# Supplementary material for: A dynamic rhizosphere interplay between tree roots and soil bacteria under drought stress
Source: eLife. 2022 Jul 20;11:e79679. doi: 10.7554/eLife.79679 (PMC9385208; doi:10.7554/eLife.79679)
Supplement: Figure 1—source data 1. [file elife-79679-fig1-data1.xlsx]

## Sheet: CFU
ANOVATwoWayRM (Drought_Rhizospher)
Multivariate Tests
		Value	F	Num df	DF	Prob>F
Drought_Rhizospher	Pillai's Trace	0.99917	6006.23	1	5	6.77679e-09
Drought_Rhizospher	Wilks' Lambda	0.000831776	6006.23	1	5	6.77679e-09
Drought_Rhizospher	Hotelling's Trace	1201.25	6006.23	1	5	6.77679e-09
Drought_Rhizospher	Roy's Largest Root	1201.25	6006.23	1	5	6.77679e-09
Days	Pillai's Trace	1	1.05621e+06	3	3	1.56396e-09
Days	Wilks' Lambda	9.46784e-07	1.05621e+06	3	3	1.56396e-09
Days	Hotelling's Trace	1.05621e+06	1.05621e+06	3	3	1.56396e-09
Days	Roy's Largest Root	1.05621e+06	1.05621e+06	3	3	1.56396e-09
Drought_Rhizospher * Days	Pillai's Trace	0.99964	2783.27	3	3	1.15541e-05
Drought_Rhizospher * Days	Wilks' Lambda	0.000359161	2783.27	3	3	1.15541e-05
Drought_Rhizospher * Days	Hotelling's Trace	2783.27	2783.27	3	3	1.15541e-05
Drought_Rhizospher * Days	Roy's Largest Root	2783.27	2783.27	3	3	1.15541e-05
Tests of Within-Subjects Effects
		Sum of Squares	DF	Mean Square	F	Prob>F
Drought_Rhizospher	Sphericity Assumed	5667.15	1	5667.15	6006.23	6.77679e-09
Drought_Rhizospher	Greenhouse-Geisser	5667.15	1	5667.15	6006.23	6.77679e-09
Drought_Rhizospher	Huynh-Feldt	5667.15	1	5667.15	6006.23	6.77679e-09
Drought_Rhizospher	Lower-bound	5667.15	1	5667.15	6006.23	6.77679e-09
Error(Drought_Rhizospher)	Sphericity Assumed	4.71773	5	0.94355
Error(Drought_Rhizospher)	Greenhouse-Geisser	4.71773	5	0.94355
Error(Drought_Rhizospher)	Huynh-Feldt	4.71773	5	0.94355
Error(Drought_Rhizospher)	Lower-bound	4.71773	5	0.94355
Days	Sphericity Assumed	35889.3	3	11963.1	13750.2	5.18194e-26
Days	Greenhouse-Geisser	35889.3	1.70275	21077.2	13750.2	1.63278e-15
Days	Huynh-Feldt	35889.3	2.49194	14402.2	13750.2	6.6133e-22
Days	Lower-bound	35889.3	1	35889.3	13750.2	8.55452e-10
Error(Days)	Sphericity Assumed	13.0505	15	0.87003
Error(Days)	Greenhouse-Geisser	13.0505	8.51377	1.53287
Error(Days)	Huynh-Feldt	13.0505	12.4597	1.04742
Error(Days)	Lower-bound	13.0505	5	2.6101
Drought_Rhizospher * Days	Sphericity Assumed	3208.3	3	1069.43	3245.26	2.59045e-21
Drought_Rhizospher * Days	Greenhouse-Geisser	3208.3	1.95405	1641.87	3245.26	1.72065e-14
Drought_Rhizospher * Days	Huynh-Feldt	3208.3	3	1069.43	3245.26	2.59045e-21
Drought_Rhizospher * Days	Lower-bound	3208.3	1	3208.3	3245.26	3.15317e-08
Error(Drought_Rhizospher * Days)	Sphericity Assumed	4.94305	15	0.32954
Error(Drought_Rhizospher * Days)	Greenhouse-Geisser	4.94305	9.77023	0.50593
Error(Drought_Rhizospher * Days)	Huynh-Feldt	4.94305	15	0.32954
Error(Drought_Rhizospher * Days)	Lower-bound	4.94305	5	0.98861
Drought_Rhizospher * Days
Descriptive Statistics
		Mean	Std. Error	95.00% LCL	95.00% UCL
Drought_Rhizospher Drought	Day1	15.1851	0.15855	14.7775	15.5927
Drought_Rhizospher Drought	Day3	79.7193	0.21131	79.1761	80.2625
Drought_Rhizospher Drought	Day7	63.9882	0.34418	63.1035	64.873
Drought_Rhizospher Drought	Day15	86.901	0.24592	86.2688	87.5332
Drought_Rhizospher Irrigated	Day1	4.85336	0.0659	4.68397	5.02276
Drought_Rhizospher Irrigated	Day3	38.1848	0.50438	36.8883	39.4814
Drought_Rhizospher Irrigated	Day7	30.4578	0.47341	29.2409	31.6748
Drought_Rhizospher Irrigated	Day15	85.3712	0.31519	84.561	86.1814
Pairwise Comparison
Bonferroni Test
Days within Drought_Rhizospher = Drought_Rhizospher Drought
	Index	Mean Difference	Std. Error	DF	|t|value	Prob>|t|	Alpha	Sig Flag	95.00% LCL	95.00% UCL
Day1 Day3	0	-64.5342	0.46508	15	138.76	2.74258e-23	0.05	1	-66.296	-62.7724
Day1 Day7	1	-48.8031	0.46508	15	104.935	1.80513e-21	0.05	1	-50.5649	-47.0413
Day1 Day15	2	-71.7159	0.46508	15	154.202	5.63936e-24	0.05	1	-73.4777	-69.9541
Day3 Day7	3	15.7311	0.46508	15	33.8246	3.94534e-14	0.05	1	13.9693	17.4929
Day3 Day15	4	-7.18171	0.46508	15	15.4419	3.60513e-09	0.05	1	-8.94353	-5.41989
Day7 Day15	5	-22.9128	0.46508	15	49.2665	1.47007e-16	0.05	1	-24.6746	-21.151
Days within Drought_Rhizospher = Drought_Rhizospher Irrigated
	Index	Mean Difference	Std. Error	DF	|t|value	Prob>|t|	Alpha	Sig Flag	95.00% LCL	95.00% UCL
Day1 Day3	0	-33.3315	0.46508	15	71.6685	5.44047e-19	0.05	1	-35.0933	-31.5696
Day1 Day7	1	-25.6045	0.46508	15	55.0541	2.80236e-17	0.05	1	-27.3663	-23.8426
Day1 Day15	2	-80.5178	0.46508	15	173.127	9.94215e-25	0.05	1	-82.2796	-78.756
Day3 Day7	3	7.72701	0.46508	15	16.6144	1.27344e-09	0.05	1	5.96519	9.48883
Day3 Day15	4	-47.1863	0.46508	15	101.459	2.9901e-21	0.05	1	-48.9481	-45.4245
Day7 Day15	5	-54.9133	0.46508	15	118.073	3.08268e-22	0.05	1	-56.6752	-53.1515
Drought_Rhizospher within Days = Day1
	Index	Mean Difference	Std. Error	DF	|t|value	Prob>|t|	Alpha	Sig Flag	95.00% LCL	95.00% UCL
Drought_Rhizospher Drought Drought_Rhizospher Irrigated	0	10.3317	0.46508	15	22.2151	1.9186e-11	0.05	1	8.56993	12.0936
Drought_Rhizospher within Days = Day3
	Index	Mean Difference	Std. Error	DF	|t|value	Prob>|t|	Alpha	Sig Flag	95.00% LCL	95.00% UCL
Drought_Rhizospher Drought Drought_Rhizospher Irrigated	0	41.5345	0.46508	15	89.3064	2.02071e-20	0.05	1	39.7726	43.2963
Drought_Rhizospher within Days = Day7
	Index	Mean Difference	Std. Error	DF	|t|value	Prob>|t|	Alpha	Sig Flag	95.00% LCL	95.00% UCL
Drought_Rhizospher Drought Drought_Rhizospher Irrigated	0	33.5304	0.46508	15	72.0962	4.97714e-19	0.05	1	31.7686	35.2922
Drought_Rhizospher within Days = Day15
	Index	Mean Difference	Std. Error	DF	|t|value	Prob>|t|	Alpha	Sig Flag	95.00% LCL	95.00% UCL
Drought_Rhizospher Drought Drought_Rhizospher Irrigated	0	1.52983	0.46508	15	3.28941	0.13904	0.05	0	-0.23199	3.29165
ANOVATwoWayRM (Drought_Soil)
Multivariate Tests
		Value	F	Num df	DF	Prob>F
Drought_Soil	Pillai's Trace	0.99998	169354	1	4	2.0919e-10
Drought_Soil	Wilks' Lambda	2.36186e-05	169354	1	4	2.0919e-10
Drought_Soil	Hotelling's Trace	42338.6	169354	1	4	2.0919e-10
Drought_Soil	Roy's Largest Root	42338.6	169354	1	4	2.0919e-10
Days	Pillai's Trace	1	239386	3	2	4.17733e-06
Days	Wilks' Lambda	2.78489e-06	239386	3	2	4.17733e-06
Days	Hotelling's Trace	359080	239386	3	2	4.17733e-06
Days	Roy's Largest Root	359080	239386	3	2	4.17733e-06
Drought_Soil * Days	Pillai's Trace	0.99997	25771.7	3	2	3.8801e-05
Drought_Soil * Days	Wilks' Lambda	2.58675e-05	25771.7	3	2	3.8801e-05
Drought_Soil * Days	Hotelling's Trace	38657.5	25771.7	3	2	3.8801e-05
Drought_Soil * Days	Roy's Largest Root	38657.5	25771.7	3	2	3.8801e-05
Tests of Within-Subjects Effects
		Sum of Squares	DF	Mean Square	F	Prob>F
Drought_Soil	Sphericity Assumed	16935.4	1	16935.4	169354	2.0919e-10
Drought_Soil	Greenhouse-Geisser	16935.4	1	16935.4	169354	2.0919e-10
Drought_Soil	Huynh-Feldt	16935.4	1	16935.4	169354	2.0919e-10
Drought_Soil	Lower-bound	16935.4	1	16935.4	169354	2.0919e-10
Error(Drought_Soil)	Sphericity Assumed	0.4	4	0.1
Error(Drought_Soil)	Greenhouse-Geisser	0.4	4	0.1
Error(Drought_Soil)	Huynh-Feldt	0.4	4	0.1
Error(Drought_Soil)	Lower-bound	0.4	4	0.1
Days	Sphericity Assumed	35635.5	3	11878.5	8296.07	3.67312e-20
Days	Greenhouse-Geisser	35635.5	1.26607	28146.6	8296.07	1.91284e-09
Days	Huynh-Feldt	35635.5	1.58393	22498.2	8296.07	2.03073e-11
Days	Lower-bound	35635.5	1	35635.5	8296.07	8.71079e-08
Error(Days)	Sphericity Assumed	17.1819	12	1.43182
Error(Days)	Greenhouse-Geisser	17.1819	5.06428	3.39276
Error(Days)	Huynh-Feldt	17.1819	6.33571	2.71191
Error(Days)	Lower-bound	17.1819	4	4.29547
Drought_Soil * Days	Sphericity Assumed	9515.38	3	3171.79	4844.34	9.24497e-19
Drought_Soil * Days	Greenhouse-Geisser	9515.38	1.6009	5943.78	4844.34	8.91345e-11
Drought_Soil * Days	Huynh-Feldt	9515.38	2.5028	3801.89	4844.34	6.2608e-16
Drought_Soil * Days	Lower-bound	9515.38	1	9515.38	4844.34	2.5532e-07
Error(Drought_Soil * Days)	Sphericity Assumed	7.85691	12	0.65474
Error(Drought_Soil * Days)	Greenhouse-Geisser	7.85691	6.40359	1.22695
Error(Drought_Soil * Days)	Huynh-Feldt	7.85691	10.0112	0.78481
Error(Drought_Soil * Days)	Lower-bound	7.85691	4	1.96423
Drought_Soil * Days
Descriptive Statistics
		Mean	Std. Error	95.00% LCL	95.00% UCL
Drought_Soil Drought	Day1	14.5115	0.1779	14.0175	15.0054
Drought_Soil Drought	Day3	96.8688	0.56365	95.3038	98.4337
Drought_Soil Drought	Day7	92.6774	0.64487	90.8869	94.4678
Drought_Soil Drought	Day15	97.2164	0.51333	95.7912	98.6417
Drought_Soil Irrigated	Day1	2.22199	0.06668	2.03684	2.40713
Drought_Soil Irrigated	Day3	9.00169	0.03529	8.9037	9.09969
Drought_Soil Irrigated	Day7	42.6811	0.35194	41.7039	43.6582
Drought_Soil Irrigated	Day15	82.7588	0.53948	81.261	84.2566
Pairwise Comparison
Bonferroni Test
Days within Drought_Soil = Drought_Soil Drought
	Index	Mean Difference	Std. Error	DF	|t|value	Prob>|t|	Alpha	Sig Flag	95.00% LCL	95.00% UCL
Day1 Day3	0	-82.3573	0.60284	12	136.616	4.44601e-19	0.05	1	-84.7641	-79.9505
Day1 Day7	1	-78.1659	0.60284	12	129.664	8.31794e-19	0.05	1	-80.5727	-75.7591
Day1 Day15	2	-82.7049	0.60284	12	137.193	4.22697e-19	0.05	1	-85.1118	-80.2981
Day3 Day7	3	4.19139	0.60284	12	6.95278	0.000429136	0.05	1	1.78458	6.5982
Day3 Day15	4	-0.34767	0.60284	12	0.57673	1	0.05	0	-2.75448	2.05914
Day7 Day15	5	-4.53906	0.60284	12	7.52951	0.00019471	0.05	1	-6.94587	-2.13225
Days within Drought_Soil = Drought_Soil Irrigated
	Index	Mean Difference	Std. Error	DF	|t|value	Prob>|t|	Alpha	Sig Flag	95.00% LCL	95.00% UCL
Day1 Day3	0	-6.77971	0.60284	12	11.2463	2.77977e-06	0.05	1	-9.18652	-4.3729
Day1 Day7	1	-40.4591	0.60284	12	67.1145	2.22495e-15	0.05	1	-42.8659	-38.0523
Day1 Day15	2	-80.5368	0.60284	12	133.596	5.81287e-19	0.05	1	-82.9436	-78.13
Day3 Day7	3	-33.6794	0.60284	12	55.8682	1.99663e-14	0.05	1	-36.0862	-31.2726
Day3 Day15	4	-73.7571	0.60284	12	122.35	1.66865e-18	0.05	1	-76.1639	-71.3503
Day7 Day15	5	-40.0777	0.60284	12	66.4819	2.49202e-15	0.05	1	-42.4845	-37.6709
Drought_Soil within Days = Day1
	Index	Mean Difference	Std. Error	DF	|t|value	Prob>|t|	Alpha	Sig Flag	95.00% LCL	95.00% UCL
Drought_Soil Drought Drought_Soil Irrigated	0	12.2895	0.60284	12	20.3861	3.12363e-09	0.05	1	9.88268	14.6963
Drought_Soil within Days = Day3
	Index	Mean Difference	Std. Error	DF	|t|value	Prob>|t|	Alpha	Sig Flag	95.00% LCL	95.00% UCL
Drought_Soil Drought Drought_Soil Irrigated	0	87.8671	0.60284	12	145.756	2.04489e-19	0.05	1	85.4603	90.2739
Drought_Soil within Days = Day7
	Index	Mean Difference	Std. Error	DF	|t|value	Prob>|t|	Alpha	Sig Flag	95.00% LCL	95.00% UCL
Drought_Soil Drought Drought_Soil Irrigated	0	49.9963	0.60284	12	82.9351	1.76392e-16	0.05	1	47.5895	52.4031
Drought_Soil within Days = Day15
	Index	Mean Difference	Std. Error	DF	|t|value	Prob>|t|	Alpha	Sig Flag	95.00% LCL	95.00% UCL
Drought_Soil Drought Drought_Soil Irrigated	0	14.4576	0.60284	12	23.9827	4.6432e-10	0.05	1	12.0508	16.8644
ANOVATwoWayRM (Re-Irrigated_Rhizosphere)
Multivariate Tests
		Value	F	Num df	DF	Prob>F
Re-Irrigated_Rhizosphere	Pillai's Trace	0.99917	6006.23	1	5	6.77679e-09
Re-Irrigated_Rhizosphere	Wilks' Lambda	0.000831776	6006.23	1	5	6.77679e-09
Re-Irrigated_Rhizosphere	Hotelling's Trace	1201.25	6006.23	1	5	6.77679e-09
Re-Irrigated_Rhizosphere	Roy's Largest Root	1201.25	6006.23	1	5	6.77679e-09
Days	Pillai's Trace	1	1.05621e+06	3	3	1.56396e-09
Days	Wilks' Lambda	9.46784e-07	1.05621e+06	3	3	1.56396e-09
Days	Hotelling's Trace	1.05621e+06	1.05621e+06	3	3	1.56396e-09
Days	Roy's Largest Root	1.05621e+06	1.05621e+06	3	3	1.56396e-09
Re-Irrigated_Rhizosphere * Days	Pillai's Trace	0.99964	2783.27	3	3	1.15541e-05
Re-Irrigated_Rhizosphere * Days	Wilks' Lambda	0.000359161	2783.27	3	3	1.15541e-05
Re-Irrigated_Rhizosphere * Days	Hotelling's Trace	2783.27	2783.27	3	3	1.15541e-05
Re-Irrigated_Rhizosphere * Days	Roy's Largest Root	2783.27	2783.27	3	3	1.15541e-05
Tests of Within-Subjects Effects
		Sum of Squares	DF	Mean Square	F	Prob>F
Re-Irrigated_Rhizosphere	Sphericity Assumed	5667.15	1	5667.15	6006.23	6.77679e-09
Re-Irrigated_Rhizosphere	Greenhouse-Geisser	5667.15	1	5667.15	6006.23	6.77679e-09
Re-Irrigated_Rhizosphere	Huynh-Feldt	5667.15	1	5667.15	6006.23	6.77679e-09
Re-Irrigated_Rhizosphere	Lower-bound	5667.15	1	5667.15	6006.23	6.77679e-09
Error(Re-Irrigated_Rhizosphere)	Sphericity Assumed	4.71773	5	0.94355
Error(Re-Irrigated_Rhizosphere)	Greenhouse-Geisser	4.71773	5	0.94355
Error(Re-Irrigated_Rhizosphere)	Huynh-Feldt	4.71773	5	0.94355
Error(Re-Irrigated_Rhizosphere)	Lower-bound	4.71773	5	0.94355
Days	Sphericity Assumed	35889.3	3	11963.1	13750.2	5.18194e-26
Days	Greenhouse-Geisser	35889.3	1.70275	21077.2	13750.2	1.63278e-15
Days	Huynh-Feldt	35889.3	2.49194	14402.2	13750.2	6.6133e-22
Days	Lower-bound	35889.3	1	35889.3	13750.2	8.55452e-10
Error(Days)	Sphericity Assumed	13.0505	15	0.87003
Error(Days)	Greenhouse-Geisser	13.0505	8.51377	1.53287
Error(Days)	Huynh-Feldt	13.0505	12.4597	1.04742
Error(Days)	Lower-bound	13.0505	5	2.6101
Re-Irrigated_Rhizosphere * Days	Sphericity Assumed	3208.3	3	1069.43	3245.26	2.59045e-21
Re-Irrigated_Rhizosphere * Days	Greenhouse-Geisser	3208.3	1.95405	1641.87	3245.26	1.72065e-14
Re-Irrigated_Rhizosphere * Days	Huynh-Feldt	3208.3	3	1069.43	3245.26	2.59045e-21
Re-Irrigated_Rhizosphere * Days	Lower-bound	3208.3	1	3208.3	3245.26	3.15317e-08
Error(Re-Irrigated_Rhizosphere * Days)	Sphericity Assumed	4.94305	15	0.32954
Error(Re-Irrigated_Rhizosphere * Days)	Greenhouse-Geisser	4.94305	9.77023	0.50593
Error(Re-Irrigated_Rhizosphere * Days)	Huynh-Feldt	4.94305	15	0.32954
Error(Re-Irrigated_Rhizosphere * Days)	Lower-bound	4.94305	5	0.98861
Re-Irrigated_Rhizosphere * Days
Descriptive Statistics
		Mean	Std. Error	95.00% LCL	95.00% UCL
Re-Irrigated_Rhizosphere Re-irrigated	Day1	15.1851	0.15855	14.7775	15.5927
Re-Irrigated_Rhizosphere Re-irrigated	Day3	79.7193	0.21131	79.1761	80.2625
Re-Irrigated_Rhizosphere Re-irrigated	Day7	63.9882	0.34418	63.1035	64.873
Re-Irrigated_Rhizosphere Re-irrigated	Day15	86.901	0.24592	86.2688	87.5332
Re-Irrigated_Rhizosphere Irrigated	Day1	4.85336	0.0659	4.68397	5.02276
Re-Irrigated_Rhizosphere Irrigated	Day3	38.1848	0.50438	36.8883	39.4814
Re-Irrigated_Rhizosphere Irrigated	Day7	30.4578	0.47341	29.2409	31.6748
Re-Irrigated_Rhizosphere Irrigated	Day15	85.3712	0.31519	84.561	86.1814
Pairwise Comparison
Bonferroni Test
Days within Re-Irrigated_Rhizosphere = Re-Irrigated_Rhizosphere Re-irrigated
	Index	Mean Difference	Std. Error	DF	|t|value	Prob>|t|	Alpha	Sig Flag	95.00% LCL	95.00% UCL
Day1 Day3	0	-64.5342	0.46508	15	138.76	2.74258e-23	0.05	1	-66.296	-62.7724
Day1 Day7	1	-48.8031	0.46508	15	104.935	1.80513e-21	0.05	1	-50.5649	-47.0413
Day1 Day15	2	-71.7159	0.46508	15	154.202	5.63936e-24	0.05	1	-73.4777	-69.9541
Day3 Day7	3	15.7311	0.46508	15	33.8246	3.94534e-14	0.05	1	13.9693	17.4929
Day3 Day15	4	-7.18171	0.46508	15	15.4419	3.60513e-09	0.05	1	-8.94353	-5.41989
Day7 Day15	5	-22.9128	0.46508	15	49.2665	1.47007e-16	0.05	1	-24.6746	-21.151
Days within Re-Irrigated_Rhizosphere = Re-Irrigated_Rhizosphere Irrigated
	Index	Mean Difference	Std. Error	DF	|t|value	Prob>|t|	Alpha	Sig Flag	95.00% LCL	95.00% UCL
Day1 Day3	0	-33.3315	0.46508	15	71.6685	5.44047e-19	0.05	1	-35.0933	-31.5696
Day1 Day7	1	-25.6045	0.46508	15	55.0541	2.80236e-17	0.05	1	-27.3663	-23.8426
Day1 Day15	2	-80.5178	0.46508	15	173.127	9.94215e-25	0.05	1	-82.2796	-78.756
Day3 Day7	3	7.72701	0.46508	15	16.6144	1.27344e-09	0.05	1	5.96519	9.48883
Day3 Day15	4	-47.1863	0.46508	15	101.459	2.9901e-21	0.05	1	-48.9481	-45.4245
Day7 Day15	5	-54.9133	0.46508	15	118.073	3.08268e-22	0.05	1	-56.6752	-53.1515
Re-Irrigated_Rhizosphere within Days = Day1
	Index	Mean Difference	Std. Error	DF	|t|value	Prob>|t|	Alpha	Sig Flag	95.00% LCL	95.00% UCL
Re-Irrigated_Rhizosphere Re-irrigated Re-Irrigated_Rhizosphere Irrigated	0	10.3317	0.46508	15	22.2151	1.9186e-11	0.05	1	8.56993	12.0936
Re-Irrigated_Rhizosphere within Days = Day3
	Index	Mean Difference	Std. Error	DF	|t|value	Prob>|t|	Alpha	Sig Flag	95.00% LCL	95.00% UCL
Re-Irrigated_Rhizosphere Re-irrigated Re-Irrigated_Rhizosphere Irrigated	0	41.5345	0.46508	15	89.3064	2.02071e-20	0.05	1	39.7726	43.2963
Re-Irrigated_Rhizosphere within Days = Day7
	Index	Mean Difference	Std. Error	DF	|t|value	Prob>|t|	Alpha	Sig Flag	95.00% LCL	95.00% UCL
Re-Irrigated_Rhizosphere Re-irrigated Re-Irrigated_Rhizosphere Irrigated	0	33.5304	0.46508	15	72.0962	4.97714e-19	0.05	1	31.7686	35.2922
Re-Irrigated_Rhizosphere within Days = Day15
	Index	Mean Difference	Std. Error	DF	|t|value	Prob>|t|	Alpha	Sig Flag	95.00% LCL	95.00% UCL
Re-Irrigated_Rhizosphere Re-irrigated Re-Irrigated_Rhizosphere Irrigated	0	1.52983	0.46508	15	3.28941	0.13904	0.05	0	-0.23199	3.29165
ANOVATwoWayRM (Re-Irrigated_Soil)
Multivariate Tests
		Value	F	Num df	DF	Prob>F
Re-Irrigated_Soil	Pillai's Trace	0.99536	858.419	1	4	8.07955e-06
Re-Irrigated_Soil	Wilks' Lambda	0.00464	858.419	1	4	8.07955e-06
Re-Irrigated_Soil	Hotelling's Trace	214.605	858.419	1	4	8.07955e-06
Re-Irrigated_Soil	Roy's Largest Root	214.605	858.419	1	4	8.07955e-06
Days	Pillai's Trace	0.99998	39863.4	3	2	2.50852e-05
Days	Wilks' Lambda	1.67235e-05	39863.4	3	2	2.50852e-05
Days	Hotelling's Trace	59795.1	39863.4	3	2	2.50852e-05
Days	Roy's Largest Root	59795.1	39863.4	3	2	2.50852e-05
Re-Irrigated_Soil * Days	Pillai's Trace	0.99997	19143.1	3	2	5.22359e-05
Re-Irrigated_Soil * Days	Wilks' Lambda	3.48242e-05	19143.1	3	2	5.22359e-05
Re-Irrigated_Soil * Days	Hotelling's Trace	28714.6	19143.1	3	2	5.22359e-05
Re-Irrigated_Soil * Days	Roy's Largest Root	28714.6	19143.1	3	2	5.22359e-05
Tests of Within-Subjects Effects
		Sum of Squares	DF	Mean Square	F	Prob>F
Re-Irrigated_Soil	Sphericity Assumed	1773.23	1	1773.23	858.419	8.07955e-06
Re-Irrigated_Soil	Greenhouse-Geisser	1773.23	1	1773.23	858.419	8.07955e-06
Re-Irrigated_Soil	Huynh-Feldt	1773.23	1	1773.23	858.419	8.07955e-06
Re-Irrigated_Soil	Lower-bound	1773.23	1	1773.23	858.419	8.07955e-06
Error(Re-Irrigated_Soil)	Sphericity Assumed	8.26276	4	2.06569
Error(Re-Irrigated_Soil)	Greenhouse-Geisser	8.26276	4	2.06569
Error(Re-Irrigated_Soil)	Huynh-Feldt	8.26276	4	2.06569
Error(Re-Irrigated_Soil)	Lower-bound	8.26276	4	2.06569
Days	Sphericity Assumed	39739.7	3	13246.6	38651.5	3.60021e-24
Days	Greenhouse-Geisser	39739.7	1.50433	26416.9	38651.5	6.18261e-13
Days	Huynh-Feldt	39739.7	2.2125	17961.5	38651.5	2.90184e-18
Days	Lower-bound	39739.7	1	39739.7	38651.5	4.01553e-09
Error(Days)	Sphericity Assumed	4.11262	12	0.34272
Error(Days)	Greenhouse-Geisser	4.11262	6.01732	0.68346
Error(Days)	Huynh-Feldt	4.11262	8.84998	0.4647
Error(Days)	Lower-bound	4.11262	4	1.02815
Re-Irrigated_Soil * Days	Sphericity Assumed	6464.68	3	2154.89	4386.12	1.67721e-18
Re-Irrigated_Soil * Days	Greenhouse-Geisser	6464.68	1.95839	3301.02	4386.12	1.18193e-12
Re-Irrigated_Soil * Days	Huynh-Feldt	6464.68	3	2154.89	4386.12	1.67721e-18
Re-Irrigated_Soil * Days	Lower-bound	6464.68	1	6464.68	4386.12	3.11409e-07
Error(Re-Irrigated_Soil * Days)	Sphericity Assumed	5.89558	12	0.4913
Error(Re-Irrigated_Soil * Days)	Greenhouse-Geisser	5.89558	7.83355	0.75261
Error(Re-Irrigated_Soil * Days)	Huynh-Feldt	5.89558	12	0.4913
Error(Re-Irrigated_Soil * Days)	Lower-bound	5.89558	4	1.47389
Re-Irrigated_Soil * Days
Descriptive Statistics
		Mean	Std. Error	95.00% LCL	95.00% UCL
Re-Irrigated_Soil Re-irrigated	Day1	1.61439	0.03458	1.51839	1.71039
Re-Irrigated_Soil Re-irrigated	Day3	65.8388	0.47966	64.507	67.1705
Re-Irrigated_Soil Re-irrigated	Day7	44.0781	0.65432	42.2614	45.8947
Re-Irrigated_Soil Re-irrigated	Day15	96.8107	0.67712	94.9307	98.6907
Re-Irrigated_Soil Irrigated	Day1	1.9554	0.01255	1.92055	1.99024
Re-Irrigated_Soil Irrigated	Day3	11.792	0.06319	11.6165	11.9674
Re-Irrigated_Soil Irrigated	Day7	57.9712	0.32663	57.0643	58.8781
Re-Irrigated_Soil Irrigated	Day15	83.3583	0.37565	82.3153	84.4012
Pairwise Comparison
Bonferroni Test
Days within Re-Irrigated_Soil = Re-Irrigated_Soil Re-irrigated
	Index	Mean Difference	Std. Error	DF	|t|value	Prob>|t|	Alpha	Sig Flag	95.00% LCL	95.00% UCL
Day1 Day3	0	-64.2244	0.51089	12	125.71	1.20587e-18	0.05	1	-66.2641	-62.1846
Day1 Day7	1	-42.4637	0.51089	12	83.1162	1.71841e-16	0.05	1	-44.5034	-40.4239
Day1 Day15	2	-95.1963	0.51089	12	186.332	1.07464e-20	0.05	1	-97.236	-93.1565
Day3 Day7	3	21.7607	0.51089	12	42.5933	5.09924e-13	0.05	1	19.721	23.8005
Day3 Day15	4	-30.9719	0.51089	12	60.6228	7.51684e-15	0.05	1	-33.0116	-28.9322
Day7 Day15	5	-52.7326	0.51089	12	103.216	1.28192e-17	0.05	1	-54.7724	-50.6929
Days within Re-Irrigated_Soil = Re-Irrigated_Soil Irrigated
	Index	Mean Difference	Std. Error	DF	|t|value	Prob>|t|	Alpha	Sig Flag	95.00% LCL	95.00% UCL
Day1 Day3	0	-9.83656	0.51089	12	19.2536	6.08583e-09	0.05	1	-11.8763	-7.79683
Day1 Day7	1	-56.0158	0.51089	12	109.643	6.21433e-18	0.05	1	-58.0556	-53.9761
Day1 Day15	2	-81.4029	0.51089	12	159.334	7.02614e-20	0.05	1	-83.4426	-79.3631
Day3 Day7	3	-46.1793	0.51089	12	90.3889	6.28959e-17	0.05	1	-48.219	-44.1395
Day3 Day15	4	-71.5663	0.51089	12	140.08	3.29272e-19	0.05	1	-73.606	-69.5266
Day7 Day15	5	-25.387	0.51089	12	49.6913	8.09953e-14	0.05	1	-27.4268	-23.3473
Re-Irrigated_Soil within Days = Day1
	Index	Mean Difference	Std. Error	DF	|t|value	Prob>|t|	Alpha	Sig Flag	95.00% LCL	95.00% UCL
Re-Irrigated_Soil Re-irrigated Re-Irrigated_Soil Irrigated	0	-0.341	0.51089	12	0.66746	1	0.05	0	-2.38074	1.69873
Re-Irrigated_Soil within Days = Day3
	Index	Mean Difference	Std. Error	DF	|t|value	Prob>|t|	Alpha	Sig Flag	95.00% LCL	95.00% UCL
Re-Irrigated_Soil Re-irrigated Re-Irrigated_Soil Irrigated	0	54.0468	0.51089	12	105.789	9.54338e-18	0.05	1	52.0071	56.0866
Re-Irrigated_Soil within Days = Day7
	Index	Mean Difference	Std. Error	DF	|t|value	Prob>|t|	Alpha	Sig Flag	95.00% LCL	95.00% UCL
Re-Irrigated_Soil Re-irrigated Re-Irrigated_Soil Irrigated	0	-13.8932	0.51089	12	27.1938	1.05432e-10	0.05	1	-15.9329	-11.8534
Re-Irrigated_Soil within Days = Day15
	Index	Mean Difference	Std. Error	DF	|t|value	Prob>|t|	Alpha	Sig Flag	95.00% LCL	95.00% UCL
Re-Irrigated_Soil Re-irrigated Re-Irrigated_Soil Irrigated	0	13.4524	0.51089	12	26.3311	1.54317e-10	0.05	1	11.4127	15.4921
