# Supplementary material for: A dynamic rhizosphere interplay between tree roots and soil bacteria under drought stress
Source: eLife. 2022 Jul 20;11:e79679. doi: 10.7554/eLife.79679 (PMC9385208; doi:10.7554/eLife.79679)
Supplement: Figure 2—source data 1. [file elife-79679-fig2-data1.xlsx]

## Sheet: Legened
Source Data s1: Tree physiological parameters and tree biomass
(A) Statistical results of Assimilation
(B) Statistical results of Transpiration
(C) Statistical results of Stomatal conductance
(D) Statistical results of Tree biomass

## Sheet: (A) Assimilation
(A) Assimilation
ANOVATwoWay (2.5)
Descriptive Statistics
Interaction
	N	Mean	SD	SEM	Variance	Missing	NonMissing
Drought with bacteria	6	7.0387	1.43689	0.58661	2.06466	0	6
Drought w/o bacteria	6	9.30317	3.60641	1.47231	13.0062	0	6
Irrigated with bacteria	6	7.23044	3.26582	1.33326	10.6656	0	6
Irrigated w/o bacteria	6	6.97785	1.7078	0.69721	2.91658	0	6
Drought with bacteria	6	7.0387	1.43689	0.58661	2.06466	0	6
Drought w/o bacteria	6	9.30317	3.60641	1.47231	13.0062	0	6
Irrigated with bacteria	6	7.23044	3.26582	1.33326	10.6656	0	6
Irrigated w/o bacteria	6	6.97785	1.7078	0.69721	2.91658	0	6
ANOVA
Overall ANOVA
	DF	Sum of Squares	Mean Square	F Value	P Value
Treatment	1	0	0	0	1
Bacteria	3	44.806	14.9353	2.08499	0.11746
Interaction	3	0	0	0	1
Model	7	44.806	6.40085	0.89357	0.52074
Error	40	286.53	7.16324	--	--
Corrected Total	47	331.336	--	--	--
Means Comparisons
Tukey Test
Treatment
	MeanDiff	SEM	q Value	Prob	Alpha	Sig	LCL	UCL
Irrigated Drought	0	0.77262	0	1	0.05	0	-1.56152	1.56152
Bacteria
	MeanDiff	SEM	q Value	Prob	Alpha	Sig	LCL	UCL
Drought w/o bacteria Drought with bacteria	2.26447	1.09265	2.9309	0.17962	0.05	0	-0.66428	5.19321
Irrigated with bacteria Drought with bacteria	0.19175	1.09265	0.24818	0.99805	0.05	0	-2.737	3.12049
Irrigated with bacteria Drought w/o bacteria	-2.07272	1.09265	2.68273	0.24557	0.05	0	-5.00147	0.85603
Irrigated w/o bacteria Drought with bacteria	-0.06084	1.09265	0.07875	0.99994	0.05	0	-2.98959	2.8679
Irrigated w/o bacteria Drought w/o bacteria	-2.32531	1.09265	3.00966	0.16173	0.05	0	-5.25406	0.60344
Irrigated w/o bacteria Irrigated with bacteria	-0.25259	1.09265	0.32693	0.99558	0.05	0	-3.18134	2.67616
Interactions
Treatment	Treatment	MeanDiff	SEM	q Value	Prob	Alpha	Sig	LCL	UCL
Drought w/o bacteria	Drought with bacteria	2.26447	1.54523	2.07246	0.82058	0.05	0	-2.67489	7.20382
Irrigated with bacteria	Drought with bacteria	0.19175	1.54523	0.17549	1	0.05	0	-4.74761	5.1311
Irrigated with bacteria	Drought w/o bacteria	-2.07272	1.54523	1.89697	0.87723	0.05	0	-7.01208	2.86664
Irrigated w/o bacteria	Drought with bacteria	-0.06084	1.54523	0.05569	1	0.05	0	-5.0002	4.87851
Irrigated w/o bacteria	Drought w/o bacteria	-2.32531	1.54523	2.12815	0.80032	0.05	0	-7.26467	2.61405
Irrigated w/o bacteria	Irrigated with bacteria	-0.25259	1.54523	0.23117	1	0.05	0	-5.19195	4.68677
ANOVATwoWay (21.5)
Descriptive Statistics
Interaction
	N	Mean	SD	SEM	Variance	Missing	NonMissing
Drought with bacteria	6	6.32861	3.83739	1.56661	14.7256	0	6
Drought w/o bacteria	6	3.85172	2.12354	0.86693	4.50942	0	6
Irrigated with bacteria	6	11.694	3.48095	1.42109	12.117	0	6
Irrigated w/o bacteria	6	12.6641	3.4772	1.41956	12.0909	0	6
Drought with bacteria	6	6.32861	3.83739	1.56661	14.7256	0	6
Drought w/o bacteria	6	3.85172	2.12354	0.86693	4.50942	0	6
Irrigated with bacteria	6	11.694	3.48095	1.42109	12.117	0	6
Irrigated w/o bacteria	6	12.6641	3.4772	1.41956	12.0909	0	6
ANOVA
Overall ANOVA
	DF	Sum of Squares	Mean Square	F Value	P Value
Treatment	1	1.7053e-13	1.7053e-13	1.57016e-14	1
Bacteria	3	645.479	215.16	19.8108	4.97361e-08
Interaction	3	0	0	0	1
Model	7	645.479	92.2113	8.49034	2.44579e-06
Error	40	434.429	10.8607	--	--
Corrected Total	47	1079.91	--	--	--
Means Comparisons
Tukey Test
Treatment
	MeanDiff	SEM	q Value	Prob	Alpha	Sig	LCL	UCL
Irrigated Drought	0	0.95135	0	1	0.05	0	-1.92275	1.92275
Bacteria
	MeanDiff	SEM	q Value	Prob	Alpha	Sig	LCL	UCL
Drought w/o bacteria Drought with bacteria	-2.47689	1.34541	2.60356	0.26972	0.05	0	-6.08315	1.12936
Irrigated with bacteria Drought with bacteria	5.36535	1.34541	5.63974	0.00152	0.05	1	1.75909	8.9716
Irrigated with bacteria Drought w/o bacteria	7.84224	1.34541	8.2433	4.79001e-06	0.05	1	4.23598	11.4485
Irrigated w/o bacteria Drought with bacteria	6.33547	1.34541	6.65948	0.000169385	0.05	1	2.72921	9.94172
Irrigated w/o bacteria Drought w/o bacteria	8.81236	1.34541	9.26304	4.51788e-07	0.05	1	5.20611	12.4186
Irrigated w/o bacteria Irrigated with bacteria	0.97012	1.34541	1.01974	0.88812	0.05	0	-2.63613	4.57638
Interactions
Treatment	Treatment	MeanDiff	SEM	q Value	Prob	Alpha	Sig	LCL	UCL
Drought w/o bacteria	Drought with bacteria	-2.47689	1.90269	1.841	0.89283	0.05	0	-8.55887	3.60509
Irrigated with bacteria	Drought with bacteria	5.36535	1.90269	3.9879	0.11857	0.05	0	-0.71663	11.4473
Irrigated with bacteria	Drought w/o bacteria	7.84224	1.90269	5.8289	0.00417	0.05	1	1.76026	13.9242
Irrigated w/o bacteria	Drought with bacteria	6.33547	1.90269	4.70896	0.03596	0.05	1	0.25349	12.4175
Irrigated w/o bacteria	Drought w/o bacteria	8.81236	1.90269	6.54996	0.000914895	0.05	1	2.73038	14.8943
Irrigated w/o bacteria	Irrigated with bacteria	0.97012	1.90269	0.72106	0.99954	0.05	0	-5.11186	7.0521
ANOVATwoWay (27.5)
Descriptive Statistics
Interaction
	N	Mean	SD	SEM	Variance	Missing	NonMissing
Drought with bacteria	6	0.87087	1.26579	0.51676	1.60222	0	6
Drought w/o bacteria	6	1.24215	1.28332	0.52391	1.64692	0	6
Irrigated with bacteria	6	7.04801	2.40262	0.98087	5.7726	0	6
Irrigated w/o bacteria	6	6.03081	1.04288	0.42575	1.08759	0	6
Drought with bacteria	6	0.87087	1.26579	0.51676	1.60222	0	6
Drought w/o bacteria	6	1.24215	1.28332	0.52391	1.64692	0	6
Irrigated with bacteria	6	7.04801	2.40262	0.98087	5.7726	0	6
Irrigated w/o bacteria	6	6.03081	1.04288	0.42575	1.08759	0	6
ANOVA
Overall ANOVA
	DF	Sum of Squares	Mean Square	F Value	P Value
Treatment	1	-2.84217e-14	-2.84217e-14	-1.12457e-14	--
Bacteria	3	367.781	122.594	48.5072	2.15962e-13
Interaction	3	0	0	0	1
Model	7	367.781	52.5402	20.7888	1.75978e-11
Error	40	101.093	2.52733	--	--
Corrected Total	47	468.875	--	--	--
Means Comparisons
Tukey Test
Treatment
	MeanDiff	SEM	q Value	Prob	Alpha	Sig	LCL	UCL
Irrigated Drought	0	0.45892	0	1	0.05	0	-0.92752	0.92752
Bacteria
	MeanDiff	SEM	q Value	Prob	Alpha	Sig	LCL	UCL
Drought w/o bacteria Drought with bacteria	0.37128	0.64902	0.80902	0.93983	0.05	0	-1.36836	2.11092
Irrigated with bacteria Drought with bacteria	6.17714	0.64902	13.4601	3.56322e-08	0.05	1	4.4375	7.91677
Irrigated with bacteria Drought w/o bacteria	5.80586	0.64902	12.651	0	0.05	1	4.06622	7.54549
Irrigated w/o bacteria Drought with bacteria	5.15994	0.64902	11.2436	0	0.05	1	3.42031	6.89958
Irrigated w/o bacteria Drought w/o bacteria	4.78866	0.64902	10.4345	1.00331e-08	0.05	1	3.04903	6.5283
Irrigated w/o bacteria Irrigated with bacteria	-1.0172	0.64902	2.21648	0.40839	0.05	0	-2.75683	0.72244
Interactions
Treatment	Treatment	MeanDiff	SEM	q Value	Prob	Alpha	Sig	LCL	UCL
Drought w/o bacteria	Drought with bacteria	0.37128	0.91785	0.57207	0.9999	0.05	0	-2.56263	3.30519
Irrigated with bacteria	Drought with bacteria	6.17714	0.91785	9.51769	1.32729e-06	0.05	1	3.24323	9.11105
Irrigated with bacteria	Drought w/o bacteria	5.80586	0.91785	8.94562	4.36409e-06	0.05	1	2.87195	8.73977
Irrigated w/o bacteria	Drought with bacteria	5.15994	0.91785	7.9504	4.13633e-05	0.05	1	2.22603	8.09385
Irrigated w/o bacteria	Drought w/o bacteria	4.78866	0.91785	7.37834	0.000148948	0.05	1	1.85475	7.72257
Irrigated w/o bacteria	Irrigated with bacteria	-1.0172	0.91785	1.56729	0.95123	0.05	0	-3.95111	1.91672
ANOVATwoWay (03.06)
Descriptive Statistics
Interaction
	N	Mean	SD	SEM	Variance	Missing	NonMissing
Drought with bacteria	6	0.55433	0.88081	0.35959	0.77582	0	6
Drought w/o bacteria	6	0.79833	0.8818	0.35999	0.77756	0	6
Irrigated with bacteria	6	7.90968	1.80968	0.7388	3.27496	0	6
Irrigated w/o bacteria	6	6.54851	2.69858	1.10169	7.28236	0	6
Drought with bacteria	6	0.55433	0.88081	0.35959	0.77582	0	6
Drought w/o bacteria	6	0.79833	0.8818	0.35999	0.77756	0	6
Irrigated with bacteria	6	7.90968	1.80968	0.7388	3.27496	0	6
Irrigated w/o bacteria	6	6.54851	2.69858	1.10169	7.28236	0	6
ANOVA
Overall ANOVA
	DF	Sum of Squares	Mean Square	F Value	P Value
Treatment	1	0	0	0	1
Bacteria	3	526.739	175.58	57.9915	1.26578e-14
Interaction	3	0	0	0	1
Model	7	526.739	75.2484	24.8535	1.10343e-12
Error	40	121.107	3.02768	--	--
Corrected Total	47	647.846	--	--	--
Means Comparisons
Tukey Test
Treatment
	MeanDiff	SEM	q Value	Prob	Alpha	Sig	LCL	UCL
Irrigated Drought	0	0.5023	0	1	0.05	0	-1.01519	1.01519
Bacteria
	MeanDiff	SEM	q Value	Prob	Alpha	Sig	LCL	UCL
Drought w/o bacteria Drought with bacteria	0.244	0.71036	0.48577	0.98586	0.05	0	-1.66006	2.14807
Irrigated with bacteria Drought with bacteria	7.35535	0.71036	14.6433	1.91562e-07	0.05	1	5.45129	9.25942
Irrigated with bacteria Drought w/o bacteria	7.11135	0.71036	14.1575	3.73764e-08	0.05	1	5.20728	9.01541
Irrigated w/o bacteria Drought with bacteria	5.99418	0.71036	11.9334	0	0.05	1	4.09011	7.89824
Irrigated w/o bacteria Drought w/o bacteria	5.75018	0.71036	11.4477	0	0.05	1	3.84611	7.65424
Irrigated w/o bacteria Irrigated with bacteria	-1.36117	0.71036	2.70987	0.23764	0.05	0	-3.26524	0.54289
Interactions
Treatment	Treatment	MeanDiff	SEM	q Value	Prob	Alpha	Sig	LCL	UCL
Drought w/o bacteria	Drought with bacteria	0.244	1.0046	0.34349	1	0.05	0	-2.96722	3.45523
Irrigated with bacteria	Drought with bacteria	7.35535	1.0046	10.3544	2.06676e-07	0.05	1	4.14413	10.5666
Irrigated with bacteria	Drought w/o bacteria	7.11135	1.0046	10.0109	5.29832e-07	0.05	1	3.90013	10.3226
Irrigated w/o bacteria	Drought with bacteria	5.99418	1.0046	8.43822	1.37447e-05	0.05	1	2.78296	9.2054
Irrigated w/o bacteria	Drought w/o bacteria	5.75018	1.0046	8.09472	2.98752e-05	0.05	1	2.53895	8.9614
Irrigated w/o bacteria	Irrigated with bacteria	-1.36117	1.0046	1.91617	0.8716	0.05	0	-4.57239	1.85005
ANOVATwoWay (10.6)
Descriptive Statistics
Interaction
	N	Mean	SD	SEM	Variance	Missing	NonMissing
Drought with bacteria	6	0.05228	0.03141	0.01282	0.000986764	0	6
Drought w/o bacteria	6	0.24149	0.54775	0.22362	0.30003	0	6
Irrigated with bacteria	6	3.57007	2.60227	1.06237	6.7718	0	6
Irrigated w/o bacteria	6	5.28345	2.1207	0.86577	4.49735	0	6
Drought with bacteria	6	0.05228	0.03141	0.01282	0.000986764	0	6
Drought w/o bacteria	6	0.24149	0.54775	0.22362	0.30003	0	6
Irrigated with bacteria	6	3.57007	2.60227	1.06237	6.7718	0	6
Irrigated w/o bacteria	6	5.28345	2.1207	0.86577	4.49735	0	6
ANOVA
Overall ANOVA
	DF	Sum of Squares	Mean Square	F Value	P Value
Treatment	1	-2.84217e-14	-2.84217e-14	-9.82586e-15	--
Bacteria	3	237.637	79.2122	27.385	8.56589e-10
Interaction	3	-1.42109e-14	-4.73695e-15	-1.63764e-15	--
Model	7	237.637	33.9481	11.7364	5.23749e-08
Error	40	115.702	2.89254	--	--
Corrected Total	47	353.338	--	--	--
Means Comparisons
Tukey Test
Treatment
	MeanDiff	SEM	q Value	Prob	Alpha	Sig	LCL	UCL
Irrigated Drought	0	0.49096	0	1	0.05	0	-0.99228	0.99228
Bacteria
	MeanDiff	SEM	q Value	Prob	Alpha	Sig	LCL	UCL
Drought w/o bacteria Drought with bacteria	0.18922	0.69433	0.3854	0.99281	0.05	0	-1.67187	2.05031
Irrigated with bacteria Drought with bacteria	3.5178	0.69433	7.16509	5.50479e-05	0.05	1	1.65671	5.37889
Irrigated with bacteria Drought w/o bacteria	3.32858	0.69433	6.77969	0.000129889	0.05	1	1.46749	5.18967
Irrigated w/o bacteria Drought with bacteria	5.23117	0.69433	10.6549	0	0.05	1	3.37008	7.09226
Irrigated w/o bacteria Drought w/o bacteria	5.04195	0.69433	10.2695	2.55657e-08	0.05	1	3.18086	6.90304
Irrigated w/o bacteria Irrigated with bacteria	1.71337	0.69433	3.48982	0.08074	0.05	0	-0.14771	3.57446
Interactions
Treatment	Treatment	MeanDiff	SEM	q Value	Prob	Alpha	Sig	LCL	UCL
Drought w/o bacteria	Drought with bacteria	0.18922	0.98193	0.27252	1	0.05	0	-2.94952	3.32796
Irrigated with bacteria	Drought with bacteria	3.5178	0.98193	5.06648	0.01869	0.05	1	0.37906	6.65654
Irrigated with bacteria	Drought w/o bacteria	3.32858	0.98193	4.79396	0.03088	0.05	1	0.18984	6.46732
Irrigated w/o bacteria	Drought with bacteria	5.23117	0.98193	7.53416	0.000105243	0.05	1	2.09243	8.36991
Irrigated w/o bacteria	Drought w/o bacteria	5.04195	0.98193	7.26164	0.000193008	0.05	1	1.90321	8.18069
Irrigated w/o bacteria	Irrigated with bacteria	1.71337	0.98193	2.46767	0.65894	0.05	0	-1.42537	4.85211
ANOVATwoWay (16.6)
Descriptive Statistics
Interaction
	N	Mean	SD	SEM	Variance	Missing	NonMissing
Drought with bacteria	6	0.65803	0.65973	0.26933	0.43524	0	6
Drought w/o bacteria	6	0.78402	1.30469	0.53264	1.70223	0	6
Irrigated with bacteria	6	10.6403	1.71943	0.70195	2.95644	0	6
Irrigated w/o bacteria	6	9.36544	2.73074	1.11482	7.45694	0	6
Drought with bacteria	6	0.65803	0.65973	0.26933	0.43524	0	6
Drought w/o bacteria	6	0.78402	1.30469	0.53264	1.70223	0	6
Irrigated with bacteria	6	10.6403	1.71943	0.70195	2.95644	0	6
Irrigated w/o bacteria	5	9.675	2.93299	1.31167	8.60243	0	5
ANOVA
Overall ANOVA
	DF	Sum of Squares	Mean Square	F Value	P Value
Treatment	1	0.07012	0.07012	0.0223	0.88206
Bacteria	3	1039.82	346.607	110.228	4.32287e-19
Interaction	3	0.20058	0.06686	0.02126	0.99572
Model	7	1040.39	148.628	47.2667	4.27016e-17
Error	39	122.634	3.14445	--	--
Corrected Total	46	1163.03	--	--	--
Means Comparisons
Tukey Test
Treatment
	MeanDiff	SEM	q Value	Prob	Alpha	Sig	LCL	UCL
Irrigated Drought	-0.10677	0.51743	0.29181	0.8376	0.05	0	-1.15337	0.93984
Bacteria
	MeanDiff	SEM	q Value	Prob	Alpha	Sig	LCL	UCL
Drought w/o bacteria Drought with bacteria	0.12599	0.72393	0.24613	0.99809	0.05	0	-1.81658	2.06856
Irrigated with bacteria Drought with bacteria	9.98226	0.72393	19.5006	0	0.05	1	8.03969	11.9248
Irrigated with bacteria Drought w/o bacteria	9.85627	0.72393	19.2544	0	0.05	1	7.9137	11.7988
Irrigated w/o bacteria Drought with bacteria	8.84812	0.7402	16.9051	0	0.05	1	6.86189	10.8344
Irrigated w/o bacteria Drought w/o bacteria	8.72213	0.7402	16.6643	0	0.05	1	6.7359	10.7084
Irrigated w/o bacteria Irrigated with bacteria	-1.13414	0.7402	2.16687	0.4286	0.05	0	-3.12037	0.85209
Interactions
Treatment	Treatment	MeanDiff	SEM	q Value	Prob	Alpha	Sig	LCL	UCL
Drought w/o bacteria	Drought with bacteria	0.12599	1.02379	0.17404	1	0.05	0	-3.15104	3.40302
Irrigated with bacteria	Drought with bacteria	9.98226	1.02379	13.789	1.80733e-08	0.05	1	6.70523	13.2593
Irrigated with bacteria	Drought w/o bacteria	9.85627	1.02379	13.6149	1.88726e-08	0.05	1	6.57924	13.1333
Irrigated w/o bacteria	Drought with bacteria	8.70741	1.02379	12.028	3.14245e-08	0.05	1	5.43038	11.9844
Irrigated w/o bacteria	Drought w/o bacteria	8.58142	1.02379	11.8539	3.47733e-08	0.05	1	5.30439	11.8584
Irrigated w/o bacteria	Irrigated with bacteria	-1.27485	1.02379	1.76102	0.91282	0.05	0	-4.55188	2.00218
ANOVATwoWay 27.6)
Descriptive Statistics
Interaction
	N	Mean	SD	SEM	Variance	Missing	NonMissing
Drought with bacteria	6	1.36632	2.07559	0.84736	4.30809	0	6
Drought w/o bacteria	6	1.63305	3.38588	1.38228	11.4642	0	6
Irrigated with bacteria	6	6.80893	2.74532	1.12077	7.53679	0	6
Irrigated w/o bacteria	6	7.25345	4.66701	1.9053	21.781	0	6
Drought with bacteria	6	1.36632	2.07559	0.84736	4.30809	0	6
Drought w/o bacteria	6	1.63305	3.38588	1.38228	11.4642	0	6
Irrigated with bacteria	6	6.80893	2.74532	1.12077	7.53679	0	6
Irrigated w/o bacteria	6	7.25345	4.66701	1.9053	21.781	0	6
ANOVA
Overall ANOVA
	DF	Sum of Squares	Mean Square	F Value	P Value
Treatment	1	-5.68434e-14	-5.68434e-14	-5.04266e-15	--
Bacteria	3	368.783	122.928	10.9051	2.28232e-05
Interaction	3	0	0	0	1
Model	7	368.783	52.6833	4.67361	0.000671092
Error	40	450.9	11.2725	--	--
Corrected Total	47	819.683	--	--	--
Tukey Test
Treatment
	MeanDiff	SEM	q Value	Prob	Alpha	Sig	LCL	UCL
Irrigated Drought	0	0.96921	0	1	0.05	0	-1.95886	1.95886
Bacteria
	MeanDiff	SEM	q Value	Prob	Alpha	Sig	LCL	UCL
Drought w/o bacteria Drought with bacteria	0.26672	1.37068	0.2752	0.99734	0.05	0	-3.40726	3.94071
Irrigated with bacteria Drought with bacteria	5.44261	1.37068	5.61549	0.00159	0.05	1	1.76862	9.11659
Irrigated with bacteria Drought w/o bacteria	5.17588	1.37068	5.34029	0.00281	0.05	1	1.5019	8.84987
Irrigated w/o bacteria Drought with bacteria	5.88713	1.37068	6.07412	0.000605002	0.05	1	2.21314	9.56111
Irrigated w/o bacteria Drought w/o bacteria	5.6204	1.37068	5.79893	0.00109	0.05	1	1.94642	9.29439
Irrigated w/o bacteria Irrigated with bacteria	0.44452	1.37068	0.45864	0.98804	0.05	0	-3.22947	4.1185
Interactions
Treatment	Treatment	MeanDiff	SEM	q Value	Prob	Alpha	Sig	LCL	UCL
Drought w/o bacteria	Drought with bacteria	0.26672	1.93843	0.19459	1	0.05	0	-5.92948	6.46293
Irrigated with bacteria	Drought with bacteria	5.44261	1.93843	3.97075	0.12168	0.05	0	-0.7536	11.6388
Irrigated with bacteria	Drought w/o bacteria	5.17588	1.93843	3.77615	0.16187	0.05	0	-1.02032	11.3721
Irrigated w/o bacteria	Drought with bacteria	5.88713	1.93843	4.29505	0.07301	0.05	0	-0.30908	12.0833
Irrigated w/o bacteria	Drought w/o bacteria	5.6204	1.93843	4.10046	0.0997	0.05	0	-0.5758	11.8166
Irrigated w/o bacteria	Irrigated with bacteria	0.44452	1.93843	0.32431	1	0.05	0	-5.75169	6.64073
ANOVATwoWay (2.7)
Descriptive Statistics
Interaction
	N	Mean	SD	SEM	Variance	Missing	NonMissing
Drought with bacteria	6	1.91186	2.57386	1.05077	6.62474	0	6
Drought w/o bacteria	6	2.37976	3.96496	1.61869	15.7209	0	6
Irrigated with bacteria	6	7.32818	3.33153	1.36009	11.0991	0	6
Irrigated w/o bacteria	6	9.26366	3.91022	1.59634	15.2898	0	6
Drought with bacteria	6	1.91186	2.57386	1.05077	6.62474	0	6
Drought w/o bacteria	6	2.37976	3.96496	1.61869	15.7209	0	6
Irrigated with bacteria	6	7.32818	3.33153	1.36009	11.0991	0	6
Irrigated w/o bacteria	6	9.26366	3.91022	1.59634	15.2898	0	6
ANOVA
Overall ANOVA
	DF	Sum of Squares	Mean Square	F Value	P Value
Treatment	1	-1.7053e-13	-1.7053e-13	-1.39966e-14	--
Bacteria	3	477.677	159.226	13.0688	4.30994e-06
Interaction	3	0	0	0	1
Model	7	477.677	68.2396	5.60091	0.000150373
Error	40	487.346	12.1837	--	--
Corrected Total	47	965.023	--	--	--
Means Comparisons
Tukey Test
Treatment
	MeanDiff	SEM	q Value	Prob	Alpha	Sig	LCL	UCL
Irrigated Drought	0	1.00762	0	1	0.05	0	-2.03649	2.03649
Bacteria
	MeanDiff	SEM	q Value	Prob	Alpha	Sig	LCL	UCL
Drought w/o bacteria Drought with bacteria	0.4679	1.42499	0.46436	0.9876	0.05	0	-3.35168	4.28748
Irrigated with bacteria Drought with bacteria	5.41633	1.42499	5.37535	0.00261	0.05	1	1.59674	9.23591
Irrigated with bacteria Drought w/o bacteria	4.94843	1.42499	4.91099	0.0066	0.05	1	1.12885	8.76801
Irrigated w/o bacteria Drought with bacteria	7.3518	1.42499	7.29618	4.10193e-05	0.05	1	3.53222	11.1714
Irrigated w/o bacteria Drought w/o bacteria	6.8839	1.42499	6.83183	0.000115718	0.05	1	3.06432	10.7035
Irrigated w/o bacteria Irrigated with bacteria	1.93548	1.42499	1.92083	0.53232	0.05	0	-1.8841	5.75506
Interactions
Treatment	Treatment	MeanDiff	SEM	q Value	Prob	Alpha	Sig	LCL	UCL
Drought w/o bacteria	Drought with bacteria	0.4679	2.01525	0.32835	1	0.05	0	-5.97386	6.90966
Irrigated with bacteria	Drought with bacteria	5.41633	2.01525	3.80095	0.15624	0.05	0	-1.02543	11.8581
Irrigated with bacteria	Drought w/o bacteria	4.94843	2.01525	3.4726	0.2439	0.05	0	-1.49333	11.3902
Irrigated w/o bacteria	Drought with bacteria	7.3518	2.01525	5.15918	0.01568	0.05	1	0.91005	13.7936
Irrigated w/o bacteria	Drought w/o bacteria	6.8839	2.01525	4.83083	0.02889	0.05	1	0.44215	13.3257
Irrigated w/o bacteria	Irrigated with bacteria	1.93548	2.01525	1.35824	0.97742	0.05	0	-4.50628	8.37723
ANOVATwoWay (11.7)
Descriptive Statistics
Interaction
		N	Mean	SD	SEM	Variance	Missing	NonMissing
Drought	Drought with bacteria	6	77.2086	94.2579	38.4806	8884.55	0	6
Drought	Drought w/o bacteria	6	56.8868	91.4079	37.3171	8355.4	0	6
Drought	Irrigated with bacteria	6	165.598	73.1742	29.8732	5354.47	0	6
Drought	Irrigated w/o bacteria	6	177.26	77.5402	31.6557	6012.48	0	6
Irrigated	Drought with bacteria	6	77.2086	94.2579	38.4806	8884.55	0	6
Irrigated	Drought w/o bacteria	6	56.8868	91.4079	37.3171	8355.4	0	6
Irrigated	Irrigated with bacteria	6	165.598	73.1742	29.8732	5354.47	0	6
Irrigated	Irrigated w/o bacteria	6	177.26	77.5402	31.6557	6012.48	0	6
ANOVA
Overall ANOVA
	DF	Sum of Squares	Mean Square	F Value	P Value
Treatment	1	0	0	0	1
Bacteria	3	152.224	50.7413	4.22903	0.01093
Interaction	3	-1.13687e-13	-3.78956e-14	-3.15841e-15	--
Model	7	152.224	21.7463	1.81244	0.11157
Error	40	479.933	11.9983	--	--
Corrected Total	47	632.157	--	--	--
Means Comparisons
Tukey Test
Treatment
	MeanDiff	SEM	q Value	Prob	Alpha	Sig	LCL	UCL
Irrigated Drought	0	0.99993	0	1	0.05	0	-2.02094	2.02094
Bacteria
	MeanDiff	SEM	q Value	Prob	Alpha	Sig	LCL	UCL
Drought w/o bacteria Drought with bacteria	-1.14544	1.41412	1.14552	0.84936	0.05	0	-4.93586	2.64498
Irrigated with bacteria Drought with bacteria	1.33373	1.41412	1.33382	0.78188	0.05	0	-2.4567	5.12415
Irrigated with bacteria Drought w/o bacteria	2.47916	1.41412	2.47934	0.31063	0.05	0	-1.31126	6.26959
Irrigated w/o bacteria Drought with bacteria	3.64164	1.41412	3.6419	0.06362	0.05	0	-0.14878	7.43206
Irrigated w/o bacteria Drought w/o bacteria	4.78708	1.41412	4.78741	0.00838	0.05	1	0.99666	8.5775
Irrigated w/o bacteria Irrigated with bacteria	2.30792	1.41412	2.30808	0.37272	0.05	0	-1.4825	6.09834
Interactions
Treatment	Treatment	MeanDiff	SEM	q Value	Prob	Alpha	Sig	LCL	UCL
Drought w/o bacteria	Drought with bacteria	-1.14544	1.99986	0.81	0.99903	0.05	0	-7.53802	5.24714
Irrigated with bacteria	Drought with bacteria	1.33373	1.99986	0.94315	0.99743	0.05	0	-5.05885	7.7263
Irrigated with bacteria	Drought w/o bacteria	2.47916	1.99986	1.75316	0.91479	0.05	0	-3.91341	8.87174
Irrigated w/o bacteria	Drought with bacteria	3.64164	1.99986	2.57521	0.61017	0.05	0	-2.75093	10.0342
Irrigated w/o bacteria	Drought w/o bacteria	4.78708	1.99986	3.38521	0.27211	0.05	0	-1.6055	11.1797
Irrigated w/o bacteria	Irrigated with bacteria	2.30792	1.99986	1.63206	0.94004	0.05	0	-4.08466	8.70049
ANOVATwoWay (20.7)
Descriptive Statistics
Interaction
		N	Mean	SD	SEM	Variance	Missing	NonMissing
Drought with bacteria	6	8.83388	0.95341	0.38923	0.90899	0	6
Drought w/o bacteria	6	10.0072	1.27875	0.52205	1.63521	0	6
Irrigated with bacteria	6	11.3458	1.39258	0.56852	1.93928	0	6
Irrigated w/o bacteria	6	9.63987	2.81291	1.14837	7.91248	0	6
Drought with bacteria	6	8.83388	0.95341	0.38923	0.90899	0	6
Drought w/o bacteria	6	10.0072	1.27875	0.52205	1.63521	0	6
Irrigated with bacteria	6	11.3458	1.39258	0.56852	1.93928	0	6
Irrigated w/o bacteria	6	9.63987	2.81291	1.14837	7.91248	0	6
ANOVA
Overall ANOVA
	DF	Sum of Squares	Mean Square	F Value	P Value
Treatment	1	4.26326e-14	4.26326e-14	1.37569e-14	1
Bacteria	3	39.5187	13.1729	4.25071	0.01068
Interaction	3	1.42109e-14	4.73695e-15	1.52855e-15	1
Model	7	39.5187	5.64554	1.82173	0.1097
Error	40	123.96	3.09899	--	--
Corrected Total	47	163.478	--	--	--
Means Comparisons
Tukey Test
Treatment
	MeanDiff	SEM	q Value	Prob	Alpha	Sig	LCL	UCL
Irrigated Drought	0	0.50818	0	1	0.05	0	-1.02708	1.02708
Bacteria
	MeanDiff	SEM	q Value	Prob	Alpha	Sig	LCL	UCL
Drought w/o bacteria Drought with bacteria	1.17334	0.71868	2.3089	0.37241	0.05	0	-0.75302	3.0997
Irrigated with bacteria Drought with bacteria	2.51191	0.71868	4.94293	0.0062	0.05	1	0.58555	4.43827
Irrigated with bacteria Drought w/o bacteria	1.33857	0.71868	2.63403	0.26025	0.05	0	-0.58779	3.26493
Irrigated w/o bacteria Drought with bacteria	0.80599	0.71868	1.58602	0.6786	0.05	0	-1.12037	2.73235
Irrigated w/o bacteria Drought w/o bacteria	-0.36735	0.71868	0.72287	0.95596	0.05	0	-2.29371	1.55901
Irrigated w/o bacteria Irrigated with bacteria	-1.70592	0.71868	3.35691	0.09875	0.05	0	-3.63228	0.22044
Interactions
Treatment	Treatment	MeanDiff	SEM	q Value	Prob	Alpha	Sig	LCL	UCL
Drought w/o bacteria	Drought with bacteria	1.17334	1.01636	1.63264	0.93994	0.05	0	-2.07548	4.42216
Irrigated with bacteria	Drought with bacteria	2.51191	1.01636	3.49518	0.23694	0.05	0	-0.73691	5.76073
Irrigated with bacteria	Drought w/o bacteria	1.33857	1.01636	1.86254	0.88697	0.05	0	-1.91025	4.58739
Irrigated w/o bacteria	Drought with bacteria	0.80599	1.01636	1.12149	0.99256	0.05	0	-2.44283	4.05481
Irrigated w/o bacteria	Drought w/o bacteria	-0.36735	1.01636	0.51115	0.99995	0.05	0	-3.61617	2.88147
Irrigated w/o bacteria	Irrigated with bacteria	-1.70592	1.01636	2.37369	0.70048	0.05	0	-4.95474	1.5429

## Sheet: (B) Transpiration 
(B)Transpiration
ANOVATwoWay (2.5)
Descriptive Statistics
Interaction
	N	Mean	SD	SEM	Variance	Missing	NonMissing
Drought with bacteria	6	2.81634	0.78944	0.32229	0.62321	0	6
Drought w/o bacteria	6	3.44569	1.85688	0.75807	3.448	0	6
Irrigated with bacteria	6	3.37617	1.57998	0.64502	2.49634	0	6
Irrigated w/o bacteria	6	3.00063	0.87673	0.35792	0.76865	0	6
Drought with bacteria	6	2.81634	0.78944	0.32229	0.62321	0	6
Drought w/o bacteria	6	3.44569	1.85688	0.75807	3.448	0	6
Irrigated with bacteria	6	3.37617	1.57998	0.64502	2.49634	0	6
Irrigated w/o bacteria	6	3.00063	0.87673	0.35792	0.76865	0	6
ANOVA
Overall ANOVA
	DF	Sum of Squares	Mean Square	F Value	P Value
Treatment	1	-2.84217e-14	-2.84217e-14	-1.54967e-14	--
Bacteria	3	3.26229	1.08743	0.59291	0.62329
Interaction	3	-1.42109e-14	-4.73695e-15	-2.58278e-15	--
Model	7	3.26229	0.46604	0.2541	0.96783
Error	40	73.3621	1.83405	--	--
Corrected Total	47	76.6244	--	--	--
Means Comparisons
Tukey Test
Treatment
	MeanDiff	SEM	q Value	Prob	Alpha	Sig	LCL	UCL
Irrigated Drought	0	0.39094	0	1	0.05	0	-0.79013	0.79013
Bacteria
	MeanDiff	SEM	q Value	Prob	Alpha	Sig	LCL	UCL
Drought w/o bacteria Drought with bacteria	0.62936	0.55288	1.60984	0.66835	0.05	0	-0.85259	2.11131
Irrigated with bacteria Drought with bacteria	0.55984	0.55288	1.43202	0.74305	0.05	0	-0.92211	2.04179
Irrigated with bacteria Drought w/o bacteria	-0.06952	0.55288	0.17782	0.99928	0.05	0	-1.55147	1.41243
Irrigated w/o bacteria Drought with bacteria	0.18429	0.55288	0.4714	0.98704	0.05	0	-1.29766	1.66624
Irrigated w/o bacteria Drought w/o bacteria	-0.44507	0.55288	1.13844	0.85168	0.05	0	-1.92702	1.03688
Irrigated w/o bacteria Irrigated with bacteria	-0.37555	0.55288	0.96062	0.90436	0.05	0	-1.8575	1.1064
Interactions
Treatment	Treatment	MeanDiff	SEM	q Value	Prob	Alpha	Sig	LCL	UCL
Drought w/o bacteria	Drought with bacteria	0.62936	0.78189	1.13833	0.99187	0.05	0	-1.86996	3.12867
Irrigated with bacteria	Drought with bacteria	0.55984	0.78189	1.01259	0.99601	0.05	0	-1.93948	3.05916
Irrigated with bacteria	Drought w/o bacteria	-0.06952	0.78189	0.12574	1	0.05	0	-2.56884	2.4298
Irrigated w/o bacteria	Drought with bacteria	0.18429	0.78189	0.33333	1	0.05	0	-2.31503	2.68361
Irrigated w/o bacteria	Drought w/o bacteria	-0.44507	0.78189	0.805	0.99907	0.05	0	-2.94438	2.05425
Irrigated w/o bacteria	Irrigated with bacteria	-0.37555	0.78189	0.67926	0.99969	0.05	0	-2.87487	2.12377
ANOVATwoWay (21.5)
Descriptive Statistics
Interaction
	N	Mean	SD	SEM	Variance	Missing	NonMissing
Drought with bacteria	6	1.14892	1.47308	0.60138	2.16996	0	6
Drought w/o bacteria	6	1.00238	0.78182	0.31918	0.61125	0	6
Irrigated with bacteria	6	3.00993	2.00094	0.81688	4.00375	0	6
Irrigated w/o bacteria	6	3.56739	1.62737	0.66437	2.64832	0	6
Drought with bacteria	6	1.14892	1.47308	0.60138	2.16996	0	6
Drought w/o bacteria	6	1.00238	0.78182	0.31918	0.61125	0	6
Irrigated with bacteria	6	3.00993	2.00094	0.81688	4.00375	0	6
Irrigated w/o bacteria	6	3.56739	1.62737	0.66437	2.64832	0	6
ANOVA
Overall ANOVA
	DF	Sum of Squares	Mean Square	F Value	P Value
Treatment	1	2.84217e-14	2.84217e-14	1.20517e-14	1
Bacteria	3	60.7625	20.2541	8.58838	0.000159973
Interaction	3	1.42109e-14	4.73695e-15	2.00861e-15	1
Model	7	60.7625	8.68035	3.68073	0.00369
Error	40	94.3328	2.35832	--	--
Corrected Total	47	155.095	--	--	--
Means Comparisons
Tukey Test
Treatment
	MeanDiff	SEM	q Value	Prob	Alpha	Sig	LCL	UCL
Irrigated Drought	0	0.44331	0	1	0.05	0	-0.89597	0.89597
Bacteria
	MeanDiff	SEM	q Value	Prob	Alpha	Sig	LCL	UCL
Drought w/o bacteria Drought with bacteria	-0.14654	0.62694	0.33055	0.99543	0.05	0	-1.827	1.53393
Irrigated with bacteria Drought with bacteria	1.86101	0.62694	4.19796	0.02493	0.05	1	0.18055	3.54147
Irrigated with bacteria Drought w/o bacteria	2.00754	0.62694	4.5285	0.01368	0.05	1	0.32708	3.68801
Irrigated w/o bacteria Drought with bacteria	2.41848	0.62694	5.45546	0.00222	0.05	1	0.73802	4.09894
Irrigated w/o bacteria Drought w/o bacteria	2.56501	0.62694	5.786	0.00112	0.05	1	0.88455	4.24547
Irrigated w/o bacteria Irrigated with bacteria	0.55747	0.62694	1.2575	0.81046	0.05	0	-1.12299	2.23793
Interactions
Treatment	Treatment	MeanDiff	SEM	q Value	Prob	Alpha	Sig	LCL	UCL
Drought w/o bacteria	Drought with bacteria	-0.14654	0.88663	0.23373	1	0.05	0	-2.98065	2.68758
Irrigated with bacteria	Drought with bacteria	1.86101	0.88663	2.9684	0.43291	0.05	0	-0.9731	4.69512
Irrigated with bacteria	Drought w/o bacteria	2.00754	0.88663	3.20213	0.33772	0.05	0	-0.82657	4.84166
Irrigated w/o bacteria	Drought with bacteria	2.41848	0.88663	3.85759	0.14394	0.05	0	-0.41563	5.25259
Irrigated w/o bacteria	Drought w/o bacteria	2.56501	0.88663	4.09132	0.10113	0.05	0	-0.2691	5.39912
Irrigated w/o bacteria	Irrigated with bacteria	0.55747	0.88663	0.88919	0.99823	0.05	0	-2.27664	3.39158
ANOVATwoWay (27.5)
Descriptive Statistics
Interaction
	N	Mean	SD	SEM	Variance	Missing	NonMissing
Drought with bacteria	6	0.31195	0.11352	0.04635	0.01289	0	6
Drought w/o bacteria	6	0.40219	0.13314	0.05435	0.01773	0	6
Irrigated with bacteria	6	2.67354	1.08994	0.44497	1.18797	0	6
Irrigated w/o bacteria	6	2.17148	0.64443	0.26309	0.41529	0	6
Drought with bacteria	6	0.31195	0.11352	0.04635	0.01289	0	6
Drought w/o bacteria	6	0.40219	0.13314	0.05435	0.01773	0	6
Irrigated with bacteria	6	2.67354	1.08994	0.44497	1.18797	0	6
Irrigated w/o bacteria	6	2.17148	0.64443	0.26309	0.41529	0	6
ANOVA
Overall ANOVA
	DF	Sum of Squares	Mean Square	F Value	P Value
Treatment	1	0	0	0	1
Bacteria	3	52.7537	17.5846	43.05	1.35308e-12
Interaction	3	0	0	0	1
Model	7	52.7537	7.53624	18.45	1.0482e-10
Error	40	16.3388	0.40847	--	--
Corrected Total	47	69.0924	--	--	--
Means Comparisons
Tukey Test
Treatment
	MeanDiff	SEM	q Value	Prob	Alpha	Sig	LCL	UCL
Irrigated Drought	0	0.1845	0	1	0.05	0	-0.37288	0.37288
Bacteria
	MeanDiff	SEM	q Value	Prob	Alpha	Sig	LCL	UCL
Drought w/o bacteria Drought with bacteria	0.09024	0.26092	0.48911	0.98557	0.05	0	-0.60913	0.78961
Irrigated with bacteria Drought with bacteria	2.36159	0.26092	12.8002	0	0.05	1	1.66222	3.06096
Irrigated with bacteria Drought w/o bacteria	2.27135	0.26092	12.3111	0	0.05	1	1.57198	2.97072
Irrigated w/o bacteria Drought with bacteria	1.85953	0.26092	10.0789	5.21192e-08	0.05	1	1.16016	2.55889
Irrigated w/o bacteria Drought w/o bacteria	1.76929	0.26092	9.58979	2.03896e-07	0.05	1	1.06992	2.46865
Irrigated w/o bacteria Irrigated with bacteria	-0.50207	0.26092	2.72127	0.23436	0.05	0	-1.20143	0.1973
Interactions
Treatment	Treatment	MeanDiff	SEM	q Value	Prob	Alpha	Sig	LCL	UCL
Drought w/o bacteria	Drought with bacteria	0.09024	0.36899	0.34586	1	0.05	0	-1.08925	1.26973
Irrigated with bacteria	Drought with bacteria	2.36159	0.36899	9.05109	3.54711e-06	0.05	1	1.1821	3.54108
Irrigated with bacteria	Drought w/o bacteria	2.27135	0.36899	8.70523	7.51267e-06	0.05	1	1.09186	3.45084
Irrigated w/o bacteria	Drought with bacteria	1.85953	0.36899	7.12686	0.000260032	0.05	1	0.68003	3.03902
Irrigated w/o bacteria	Drought w/o bacteria	1.76929	0.36899	6.78101	0.000554952	0.05	1	0.58979	2.94878
Irrigated w/o bacteria	Irrigated with bacteria	-0.50207	0.36899	1.92423	0.86919	0.05	0	-1.68156	0.67743
ANOVATwoWay (03.6)
Descriptive Statistics
Interaction
	N	Mean	SD	SEM	Variance	Missing	NonMissing
Drought with bacteria	6	0.14277	0.15422	0.06296	0.02379	0	6
Drought w/o bacteria	6	0.21341	0.25256	0.10311	0.06379	0	6
Irrigated with bacteria	6	4.54208	1.23554	0.50441	1.52655	0	6
Irrigated w/o bacteria	6	4.86963	1.44357	0.58934	2.08389	0	6
Drought with bacteria	6	0.14277	0.15422	0.06296	0.02379	0	6
Drought w/o bacteria	6	0.21341	0.25256	0.10311	0.06379	0	6
Irrigated with bacteria	6	4.54208	1.23554	0.50441	1.52655	0	6
Irrigated w/o bacteria	6	4.86963	1.44357	0.58934	2.08389	0	6
ANOVA
Overall ANOVA
	DF	Sum of Squares	Mean Square	F Value	P Value
Treatment	1	0	0	0	1
Bacteria	3	246.681	82.227	88.9419	9.67295e-18
Interaction	3	0	0	0	1
Model	7	246.681	35.2401	38.1179	9.5728e-16
Error	40	36.9801	0.9245	--	--
Corrected Total	47	283.661	--	--	--
Means Comparisons
Tukey Test
Treatment
	MeanDiff	SEM	q Value	Prob	Alpha	Sig	LCL	UCL
Irrigated Drought	0	0.27756	0	1	0.05	0	-0.56098	0.56098
Bacteria
	MeanDiff	SEM	q Value	Prob	Alpha	Sig	LCL	UCL
Drought w/o bacteria Drought with bacteria	0.07064	0.39254	0.2545	0.9979	0.05	0	-0.98152	1.1228
Irrigated with bacteria Drought with bacteria	4.39931	0.39254	15.8497	4.11431e-08	0.05	1	3.34715	5.45147
Irrigated with bacteria Drought w/o bacteria	4.32867	0.39254	15.5952	2.03319e-07	0.05	1	3.27651	5.38083
Irrigated w/o bacteria Drought with bacteria	4.72685	0.39254	17.0298	0	0.05	1	3.67469	5.77901
Irrigated w/o bacteria Drought w/o bacteria	4.65621	0.39254	16.7753	0	0.05	1	3.60405	5.70837
Irrigated w/o bacteria Irrigated with bacteria	0.32755	0.39254	1.18007	0.83777	0.05	0	-0.72461	1.3797
Interactions
Treatment	Treatment	MeanDiff	SEM	q Value	Prob	Alpha	Sig	LCL	UCL
Drought w/o bacteria	Drought with bacteria	0.07064	0.55513	0.17996	1	0.05	0	-1.70383	1.84512
Irrigated with bacteria	Drought with bacteria	4.39931	0.55513	11.2074	8.56258e-08	0.05	1	2.62483	6.17378
Irrigated with bacteria	Drought w/o bacteria	4.32867	0.55513	11.0275	1.00349e-07	0.05	1	2.55419	6.10314
Irrigated w/o bacteria	Drought with bacteria	4.72685	0.55513	12.0419	5.6489e-08	0.05	1	2.95238	6.50133
Irrigated w/o bacteria	Drought w/o bacteria	4.65621	0.55513	11.8619	5.98987e-08	0.05	1	2.88174	6.43069
Irrigated w/o bacteria	Irrigated with bacteria	0.32755	0.55513	0.83444	0.99882	0.05	0	-1.44693	2.10202
ANOVATwoWay (10.6)
Descriptive Statistics
Interaction
	N	Mean	SD	SEM	Variance	Missing	NonMissing
Drought with bacteria	6	0.18738	0.09848	0.0402	0.0097	0	6
Drought w/o bacteria	6	0.2364	0.22977	0.0938	0.0528	0	6
Irrigated with bacteria	6	5.49818	0.96419	0.39363	0.92966	0	6
Irrigated w/o bacteria	6	5.51752	1.06064	0.433	1.12495	0	6
Drought with bacteria	6	0.18738	0.09848	0.0402	0.0097	0	6
Drought w/o bacteria	6	0.2364	0.22977	0.0938	0.0528	0	6
Irrigated with bacteria	6	5.49818	0.96419	0.39363	0.92966	0	6
Irrigated w/o bacteria	6	5.51752	1.06064	0.433	1.12495	0	6
ANOVA
Overall ANOVA
	DF	Sum of Squares	Mean Square	F Value	P Value
Treatment	1	-7.10543e-15	-7.10543e-15	-1.34248e-14	--
Bacteria	3	336.583	112.194	211.977	1.38532e-24
Interaction	3	3.55271e-15	1.18424e-15	2.23746e-15	1
Model	7	336.583	48.0833	90.8471	1.59133e-22
Error	40	21.1711	0.52928	--	--
Corrected Total	47	357.754	--	--	--
Means Comparisons
Tukey Test
Treatment
	MeanDiff	SEM	q Value	Prob	Alpha	Sig	LCL	UCL
Irrigated Drought	0	0.21002	0	1	0.05	0	-0.42446	0.42446
Bacteria
	MeanDiff	SEM	q Value	Prob	Alpha	Sig	LCL	UCL
Drought w/o bacteria Drought with bacteria	0.04902	0.29701	0.23341	0.99837	0.05	0	-0.74708	0.84512
Irrigated with bacteria Drought with bacteria	5.3108	0.29701	25.2877	0	0.05	1	4.5147	6.1069
Irrigated with bacteria Drought w/o bacteria	5.26178	0.29701	25.0543	0	0.05	1	4.46568	6.05788
Irrigated w/o bacteria Drought with bacteria	5.33014	0.29701	25.3798	0	0.05	1	4.53404	6.12624
Irrigated w/o bacteria Drought w/o bacteria	5.28112	0.29701	25.1464	0	0.05	1	4.48502	6.07722
Irrigated w/o bacteria Irrigated with bacteria	0.01934	0.29701	0.0921	0.9999	0.05	0	-0.77676	0.81544
Interactions
Treatment	Treatment	MeanDiff	SEM	q Value	Prob	Alpha	Sig	LCL	UCL
Drought w/o bacteria	Drought with bacteria	0.04902	0.42003	0.16505	1	0.05	0	-1.29361	1.39165
Irrigated with bacteria	Drought with bacteria	5.3108	0.42003	17.8811	8.62448e-09	0.05	1	3.96817	6.65343
Irrigated with bacteria	Drought w/o bacteria	5.26178	0.42003	17.716	8.93141e-09	0.05	1	3.91915	6.60441
Irrigated w/o bacteria	Drought with bacteria	5.33014	0.42003	17.9462	8.50387e-09	0.05	1	3.98751	6.67277
Irrigated w/o bacteria	Drought w/o bacteria	5.28112	0.42003	17.7812	8.81008e-09	0.05	1	3.93849	6.62375
Irrigated w/o bacteria	Irrigated with bacteria	0.01934	0.42003	0.06512	1	0.05	0	-1.32329	1.36197
ANOVATwoWay (16.6)
Descriptive Statistics
Interaction
	N	Mean	SD	SEM	Variance	Missing	NonMissing
Drought with bacteria	6	1.46825	0.70597	0.28821	0.4984	0	6
Drought w/o bacteria	6	1.59875	0.82606	0.33724	0.68238	0	6
Irrigated with bacteria	6	5.78358	1.2393	0.50594	1.53587	0	6
Irrigated w/o bacteria	6	6.1624	1.77268	0.72369	3.14239	0	6
Drought with bacteria	6	1.46825	0.70597	0.28821	0.4984	0	6
Drought w/o bacteria	6	1.59875	0.82606	0.33724	0.68238	0	6
Irrigated with bacteria	6	5.78358	1.2393	0.50594	1.53587	0	6
Irrigated w/o bacteria	6	6.1624	1.77268	0.72369	3.14239	0	6
ANOVA
Overall ANOVA
	DF	Sum of Squares	Mean Square	F Value	P Value
Treatment	1	0.0144	0.0144	0.00968	0.92213
Bacteria	3	227.262	75.7541	50.9379	1.47439e-13
Interaction	3	0.04118	0.01373	0.00923	0.99876
Model	7	228.181	32.5973	21.9188	1.11236e-11
Error	39	58.0002	1.48719	--	--
Corrected Total	46	286.182	--	--	--
Means Comparisons
Tukey Test
Treatment
	MeanDiff	SEM	q Value	Prob	Alpha	Sig	LCL	UCL
Irrigated Drought	-0.13524	0.35585	0.53746	0.70597	0.05	0	-0.85501	0.58453
Bacteria
	MeanDiff	SEM	q Value	Prob	Alpha	Sig	LCL	UCL
Drought w/o bacteria Drought with bacteria	0.1305	0.49786	0.37069	0.99359	0.05	0	-1.20544	1.46644
Irrigated with bacteria Drought with bacteria	4.31533	0.49786	12.2581	0	0.05	1	2.97939	5.65127
Irrigated with bacteria Drought w/o bacteria	4.18483	0.49786	11.8874	0	0.05	1	2.84889	5.52077
Irrigated w/o bacteria Drought with bacteria	4.63039	0.50905	12.8639	0	0.05	1	3.26443	5.99636
Irrigated w/o bacteria Drought w/o bacteria	4.49989	0.50905	12.5014	0	0.05	1	3.13393	5.86586
Irrigated w/o bacteria Irrigated with bacteria	0.31506	0.50905	0.87529	0.92542	0.05	0	-1.0509	1.68103
Interactions
Treatment	Treatment	MeanDiff	SEM	q Value	Prob	Alpha	Sig	LCL	UCL
Drought w/o bacteria	Drought with bacteria	0.1305	0.69875	0.26411	1	0.05	0	-2.10307	2.36406
Irrigated with bacteria	Drought with bacteria	4.31533	0.69875	8.73386	7.04162e-06	0.05	1	2.08176	6.5489
Irrigated with bacteria	Drought w/o bacteria	4.18483	0.69875	8.46975	1.27981e-05	0.05	1	1.95127	6.4184
Irrigated w/o bacteria	Drought with bacteria	4.69415	0.69875	9.50055	1.37407e-06	0.05	1	2.46058	6.92771
Irrigated w/o bacteria	Drought w/o bacteria	4.56365	0.69875	9.23644	2.38194e-06	0.05	1	2.33008	6.79722
Irrigated w/o bacteria	Irrigated with bacteria	0.37882	0.69875	0.76669	0.99932	0.05	0	-1.85475	2.61238
ANOVATwoWay (27.6)
Descriptive Statistics
Interaction
	N	Mean	SD	SEM	Variance	Missing	NonMissing
Drought with bacteria	6	0.58334	0.91216	0.37239	0.83203	0	6
Drought w/o bacteria	6	0.9545	1.3922	0.56836	1.93821	0	6
Irrigated with bacteria	6	3.7514	0.7779	0.31758	0.60512	0	6
Irrigated w/o bacteria	6	3.53097	0.83444	0.34066	0.6963	0	6
Drought with bacteria	6	0.58334	0.91216	0.37239	0.83203	0	6
Drought w/o bacteria	6	0.9545	1.3922	0.56836	1.93821	0	6
Irrigated with bacteria	6	3.7514	0.7779	0.31758	0.60512	0	6
Irrigated w/o bacteria	6	3.53097	0.83444	0.34066	0.6963	0	6
ANOVA
Overall ANOVA
	DF	Sum of Squares	Mean Square	F Value	P Value
Treatment	1	-1.42109e-14	-1.42109e-14	-1.39607e-14	--
Bacteria	3	100.117	33.3724	32.785	7.28339e-11
Interaction	3	7.10543e-15	2.36848e-15	2.32679e-15	1
Model	7	100.117	14.3025	14.0507	4.93711e-09
Error	40	40.7167	1.01792	--	--
Corrected Total	47	140.834	--	--	--
Means Comparisons
Tukey Test
Treatment
	MeanDiff	SEM	q Value	Prob	Alpha	Sig	LCL	UCL
Irrigated Drought	0	0.29125	0	1	0.05	0	-0.58864	0.58864
Bacteria
	MeanDiff	SEM	q Value	Prob	Alpha	Sig	LCL	UCL
Drought w/o bacteria Drought with bacteria	0.37115	0.41189	1.27435	0.80428	0.05	0	-0.73288	1.47519
Irrigated with bacteria Drought with bacteria	3.16806	0.41189	10.8775	0	0.05	1	2.06402	4.27209
Irrigated with bacteria Drought w/o bacteria	2.7969	0.41189	9.60311	1.97176e-07	0.05	1	1.69287	3.90094
Irrigated w/o bacteria Drought with bacteria	2.94763	0.41189	10.1206	4.53129e-08	0.05	1	1.8436	4.05167
Irrigated w/o bacteria Drought w/o bacteria	2.57648	0.41189	8.84629	1.19869e-06	0.05	1	1.47244	3.68051
Irrigated w/o bacteria Irrigated with bacteria	-0.22043	0.41189	0.75683	0.94995	0.05	0	-1.32446	0.88361
Interactions
Treatment	Treatment	MeanDiff	SEM	q Value	Prob	Alpha	Sig	LCL	UCL
Drought w/o bacteria	Drought with bacteria	0.37115	0.5825	0.9011	0.99808	0.05	0	-1.49081	2.23312
Irrigated with bacteria	Drought with bacteria	3.16806	0.5825	7.69153	7.40041e-05	0.05	1	1.30609	5.03002
Irrigated with bacteria	Drought w/o bacteria	2.7969	0.5825	6.79043	0.000543691	0.05	1	0.93494	4.65887
Irrigated w/o bacteria	Drought with bacteria	2.94763	0.5825	7.15637	0.000243632	0.05	1	1.08567	4.8096
Irrigated w/o bacteria	Drought w/o bacteria	2.57648	0.5825	6.25527	0.00172	0.05	1	0.71451	4.43844
Irrigated w/o bacteria	Irrigated with bacteria	-0.22043	0.5825	0.53516	0.99994	0.05	0	-2.08239	1.64154
ANOVATwoWay (02.7)
Descriptive Statistics
Interaction
	N	Mean	SD	SEM	Variance	Missing	NonMissing
Drought with bacteria	6	0.74365	0.88859	0.36276	0.78958	0	6
Drought w/o bacteria	6	1.36273	1.80193	0.73564	3.24696	0	6
Irrigated with bacteria	6	3.5867	1.96855	0.80366	3.87519	0	6
Irrigated w/o bacteria	6	3.39349	0.30591	0.12489	0.09358	0	6
Drought with bacteria	6	0.74365	0.88859	0.36276	0.78958	0	6
Drought w/o bacteria	6	1.36273	1.80193	0.73564	3.24696	0	6
Irrigated with bacteria	6	3.5867	1.96855	0.80366	3.87519	0	6
Irrigated w/o bacteria	6	3.39349	0.30591	0.12489	0.09358	0	6
ANOVA
Overall ANOVA
	DF	Sum of Squares	Mean Square	F Value	P Value
Treatment	1	0	0	0	1
Bacteria	3	73.7857	24.5952	12.2895	7.73576e-06
Interaction	3	-1.42109e-14	-4.73695e-15	-2.3669e-15	--
Model	7	73.7857	10.5408	5.26691	0.000255024
Error	40	80.0531	2.00133	--	--
Corrected Total	47	153.839	--	--	--
Means Comparisons
Tukey Test
Treatment
	MeanDiff	SEM	q Value	Prob	Alpha	Sig	LCL	UCL
Irrigated Drought	0	0.40838	0	1	0.05	0	-0.82538	0.82538
Bacteria
	MeanDiff	SEM	q Value	Prob	Alpha	Sig	LCL	UCL
Drought w/o bacteria Drought with bacteria	0.61907	0.57754	1.51591	0.70838	0.05	0	-0.92898	2.16713
Irrigated with bacteria Drought with bacteria	2.84305	0.57754	6.9617	8.67059e-05	0.05	1	1.29499	4.3911
Irrigated with bacteria Drought w/o bacteria	2.22397	0.57754	5.44579	0.00226	0.05	1	0.67592	3.77203
Irrigated w/o bacteria Drought with bacteria	2.64984	0.57754	6.48861	0.000246518	0.05	1	1.10179	4.1979
Irrigated w/o bacteria Drought w/o bacteria	2.03077	0.57754	4.97269	0.00585	0.05	1	0.48271	3.57882
Irrigated w/o bacteria Irrigated with bacteria	-0.1932	0.57754	0.4731	0.9869	0.05	0	-1.74126	1.35485
Interactions
Treatment	Treatment	MeanDiff	SEM	q Value	Prob	Alpha	Sig	LCL	UCL
Drought w/o bacteria	Drought with bacteria	0.61907	0.81677	1.07191	0.99434	0.05	0	-1.99173	3.22988
Irrigated with bacteria	Drought with bacteria	2.84305	0.81677	4.92267	0.02442	0.05	1	0.23224	5.45385
Irrigated with bacteria	Drought w/o bacteria	2.22397	0.81677	3.85076	0.14538	0.05	0	-0.38683	4.83478
Irrigated w/o bacteria	Drought with bacteria	2.64984	0.81677	4.58814	0.04448	0.05	1	0.03904	5.26065
Irrigated w/o bacteria	Drought w/o bacteria	2.03077	0.81677	3.51623	0.23059	0.05	0	-0.58004	4.64157
Irrigated w/o bacteria	Irrigated with bacteria	-0.1932	0.81677	0.33453	1	0.05	0	-2.80401	2.4176
ANOVATwoWay (11.7)
Descriptive Statistics
Interaction
	N	Mean	SD	SEM	Variance	Missing	NonMissing
Drought with bacteria	6	1.60614	2.05495	0.83893	4.22283	0	6
Drought w/o bacteria	6	1.41804	2.20309	0.89941	4.85361	0	6
Irrigated with bacteria	6	4.19208	1.98901	0.81201	3.95617	0	6
Irrigated w/o bacteria	6	4.44517	1.17649	0.4803	1.38413	0	6
Drought with bacteria	6	1.60614	2.05495	0.83893	4.22283	0	6
Drought w/o bacteria	6	1.41804	2.20309	0.89941	4.85361	0	6
Irrigated with bacteria	6	4.19208	1.98901	0.81201	3.95617	0	6
Irrigated w/o bacteria	6	4.44517	1.17649	0.4803	1.38413	0	6
ANOVA
Overall ANOVA
	DF	Sum of Squares	Mean Square	F Value	P Value
Treatment	1	-2.84217e-14	-2.84217e-14	-7.88575e-15	--
Bacteria	3	95.1166	31.7055	8.79686	0.000133242
Interaction	3	-2.84217e-14	-9.4739e-15	-2.62858e-15	--
Model	7	95.1166	13.5881	3.77008	0.00315
Error	40	144.167	3.60419	--	--
Corrected Total	47	239.284	--	--	--
Means Comparisons
Tukey Test
Treatment
	MeanDiff	SEM	q Value	Prob	Alpha	Sig	LCL	UCL
Irrigated Drought	0	0.54804	0	1	0.05	0	-1.10763	1.10763
Bacteria
	MeanDiff	SEM	q Value	Prob	Alpha	Sig	LCL	UCL
Drought w/o bacteria Drought with bacteria	-0.18809	0.77505	0.34321	0.99489	0.05	0	-2.26554	1.88936
Irrigated with bacteria Drought with bacteria	2.58595	0.77505	4.71853	0.00956	0.05	1	0.5085	4.6634
Irrigated with bacteria Drought w/o bacteria	2.77404	0.77505	5.06174	0.00491	0.05	1	0.69659	4.85149
Irrigated w/o bacteria Drought with bacteria	2.83904	0.77505	5.18034	0.00388	0.05	1	0.76159	4.91649
Irrigated w/o bacteria Drought w/o bacteria	3.02713	0.77505	5.52355	0.00193	0.05	1	0.94968	5.10458
Irrigated w/o bacteria Irrigated with bacteria	0.25309	0.77505	0.4618	0.98779	0.05	0	-1.82436	2.33054
Interactions
Treatment	Treatment	MeanDiff	SEM	q Value	Prob	Alpha	Sig	LCL	UCL
Drought w/o bacteria	Drought with bacteria	-0.18809	1.09608	0.24269	1	0.05	0	-3.69173	3.31554
Irrigated with bacteria	Drought with bacteria	2.58595	1.09608	3.33651	0.28872	0.05	0	-0.91769	6.08959
Irrigated with bacteria	Drought w/o bacteria	2.77404	1.09608	3.57919	0.21229	0.05	0	-0.7296	6.27768
Irrigated w/o bacteria	Drought with bacteria	2.83904	1.09608	3.66305	0.18957	0.05	0	-0.6646	6.34267
Irrigated w/o bacteria	Drought w/o bacteria	3.02713	1.09608	3.90574	0.1341	0.05	0	-0.47651	6.53077
Irrigated w/o bacteria	Irrigated with bacteria	0.25309	1.09608	0.32655	1	0.05	0	-3.25055	3.75673
ANOVATwoWay (20.7)
Descriptive Statistics
Interaction
	N	Mean	SD	SEM	Variance	Missing	NonMissing
Drought with bacteria	6	4.45032	0.56431	0.23038	0.31845	0	6
Drought w/o bacteria	6	6.9276	0.2046	0.08353	0.04186	0	6
Irrigated with bacteria	6	5.7665	1.66296	0.6789	2.76545	0	6
Irrigated w/o bacteria	6	6.22522	1.54643	0.63133	2.39144	0	6
Drought with bacteria	6	4.45032	0.56431	0.23038	0.31845	0	6
Drought w/o bacteria	6	6.9276	0.2046	0.08353	0.04186	0	6
Irrigated with bacteria	6	5.7665	1.66296	0.6789	2.76545	0	6
Irrigated w/o bacteria	6	6.22522	1.54643	0.63133	2.39144	0	6
ANOVA
Overall ANOVA
	DF	Sum of Squares	Mean Square	F Value	P Value
Treatment	1	-7.10543e-15	-7.10543e-15	-5.15148e-15	--
Bacteria	3	39.2143	13.0714	9.47687	7.41882e-05
Interaction	3	0	0	0	1
Model	7	39.2143	5.60205	4.06152	0.00189
Error	40	55.172	1.3793	--	--
Corrected Total	47	94.3863	--	--	--
Tukey Test
Treatment
	MeanDiff	SEM	q Value	Prob	Alpha	Sig	LCL	UCL
Irrigated Drought	0	0.33903	0	1	0.05	0	-0.68521	0.68521
Bacteria
	MeanDiff	SEM	q Value	Prob	Alpha	Sig	LCL	UCL
Drought w/o bacteria Drought with bacteria	2.47728	0.47946	7.30696	4.00374e-05	0.05	1	1.19213	3.76244
Irrigated with bacteria Drought with bacteria	1.31618	0.47946	3.8822	0.04295	0.05	1	0.03103	2.60134
Irrigated with bacteria Drought w/o bacteria	-1.1611	0.47946	3.42477	0.08918	0.05	0	-2.44626	0.12406
Irrigated w/o bacteria Drought with bacteria	1.7749	0.47946	5.23521	0.00347	0.05	1	0.48974	3.06005
Irrigated w/o bacteria Drought w/o bacteria	-0.70239	0.47946	2.07175	0.46767	0.05	0	-1.98754	0.58277
Irrigated w/o bacteria Irrigated with bacteria	0.45871	0.47946	1.35301	0.77446	0.05	0	-0.82644	1.74387
Interactions
Treatment	Treatment	MeanDiff	SEM	q Value	Prob	Alpha	Sig	LCL	UCL
Drought w/o bacteria	Drought with bacteria	2.47728	0.67806	5.1668	0.01545	0.05	1	0.30985	4.64471
Irrigated with bacteria	Drought with bacteria	1.31618	0.67806	2.74513	0.53232	0.05	0	-0.85125	3.48361
Irrigated with bacteria	Drought w/o bacteria	-1.1611	0.67806	2.42167	0.67944	0.05	0	-3.32853	1.00633
Irrigated w/o bacteria	Drought with bacteria	1.7749	0.67806	3.70185	0.17969	0.05	0	-0.39253	3.94232
Irrigated w/o bacteria	Drought w/o bacteria	-0.70239	0.67806	1.46495	0.96584	0.05	0	-2.86982	1.46504

## Sheet: (C) Stomatal conductance 
(C) Stomatal conductance
ANOVATwoWay (2.5)
Descriptive Statistics
Interaction
	N	Mean	SD	SEM	Variance	Missing	NonMissing
Drought with bacteria	6	128.116	26.3815	10.7702	695.985	0	6
Drought w/o bacteria	6	152.151	81.8365	33.4096	6697.21	0	6
Irrigated with bacteria	6	144.794	52.0511	21.2498	2709.31	0	6
Irrigated w/o bacteria	6	138.128	48.2827	19.7113	2331.22	0	6
Drought with bacteria	6	128.116	26.3815	10.7702	695.985	0	6
Drought w/o bacteria	6	152.151	81.8365	33.4096	6697.21	0	6
Irrigated with bacteria	6	144.794	52.0511	21.2498	2709.31	0	6
Irrigated w/o bacteria	6	138.128	48.2827	19.7113	2331.22	0	6
ANOVA
Overall ANOVA
	DF	Sum of Squares	Mean Square	F Value	P Value
Treatment	1	-2.91038e-11	-2.91038e-11	-9.36287e-15	--
Bacteria	3	3753.67	1251.22	0.40253	0.75195
Interaction	3	-2.91038e-11	-9.70128e-12	-3.12096e-15	--
Model	7	3753.67	536.239	0.17251	0.98941
Error	40	124337	3108.43	--	--
Corrected Total	47	128091	--	--	--
Means Comparisons
Tukey Test
Treatment
	MeanDiff	SEM	q Value	Prob	Alpha	Sig	LCL	UCL
Irrigated Drought	0	16.0946	0	1	0.05	0	-32.5284	32.5284
Bacteria
	MeanDiff	SEM	q Value	Prob	Alpha	Sig	LCL	UCL
Drought w/o bacteria Drought with bacteria	24.0343	22.7612	1.49332	0.71784	0.05	0	-36.9752	85.0439
Irrigated with bacteria Drought with bacteria	16.6777	22.7612	1.03623	0.88336	0.05	0	-44.3319	77.6872
Irrigated with bacteria Drought w/o bacteria	-7.35667	22.7612	0.45709	0.98815	0.05	0	-68.3662	53.6529
Irrigated w/o bacteria Drought with bacteria	10.0115	22.7612	0.62204	0.97118	0.05	0	-50.998	71.0211
Irrigated w/o bacteria Drought w/o bacteria	-14.0228	22.7612	0.87128	0.92635	0.05	0	-75.0324	46.9867
Irrigated w/o bacteria Irrigated with bacteria	-6.66615	22.7612	0.41419	0.99112	0.05	0	-67.6757	54.3434
Interactions
Treatment	Treatment	MeanDiff	SEM	q Value	Prob	Alpha	Sig	LCL	UCL
Drought w/o bacteria	Drought with bacteria	24.0343	32.1892	1.05594	0.99484	0.05	0	-78.8588	126.927
Irrigated with bacteria	Drought with bacteria	16.6777	32.1892	0.73272	0.99949	0.05	0	-86.2154	119.571
Irrigated with bacteria	Drought w/o bacteria	-7.35667	32.1892	0.32321	1	0.05	0	-110.25	95.5364
Irrigated w/o bacteria	Drought with bacteria	10.0115	32.1892	0.43985	0.99998	0.05	0	-92.8816	112.905
Irrigated w/o bacteria	Drought w/o bacteria	-14.0228	32.1892	0.61608	0.99984	0.05	0	-116.916	88.8703
Irrigated w/o bacteria	Irrigated with bacteria	-6.66615	32.1892	0.29287	1	0.05	0	-109.559	96.227
ANOVATwoWay (21.5)
Descriptive Statistics
Interaction
	N	Mean	SD	SEM	Variance	Missing	NonMissing
Drought with bacteria	6	87.9333	82.256	33.5809	6766.04	0	6
Drought w/o bacteria	6	78.4245	78.5168	32.0544	6164.89	0	6
Irrigated with bacteria	6	243.455	56.3052	22.9865	3170.28	0	6
Irrigated w/o bacteria	6	297.089	24.9966	10.2048	624.83	0	6
Drought with bacteria	6	87.9333	82.256	33.5809	6766.04	0	6
Drought w/o bacteria	6	78.4245	78.5168	32.0544	6164.89	0	6
Irrigated with bacteria	6	243.455	56.3052	22.9865	3170.28	0	6
Irrigated w/o bacteria	6	297.089	24.9966	10.2048	624.83	0	6
ANOVA
Overall ANOVA
	DF	Sum of Squares	Mean Square	F Value	P Value
Treatment	1	5.82077e-11	5.82077e-11	1.39202e-14	1
Bacteria	3	437846	145949	34.9034	2.99122e-11
Interaction	3	2.91038e-11	9.70128e-12	2.32004e-15	1
Model	7	437846	62549.5	14.9586	2.0957e-09
Error	40	167260	4181.51	--	--
Corrected Total	47	605107	--	--	--
Means Comparisons
Tukey Test
Treatment
	MeanDiff	SEM	q Value	Prob	Alpha	Sig	LCL	UCL
Irrigated Drought	0	18.6671	0	1	0.05	0	-37.7276	37.7276
Bacteria
	MeanDiff	SEM	q Value	Prob	Alpha	Sig	LCL	UCL
Drought w/o bacteria Drought with bacteria	-9.5088	26.3992	0.50939	0.98377	0.05	0	-80.2698	61.2522
Irrigated with bacteria Drought with bacteria	155.521	26.3992	8.33132	3.91697e-06	0.05	1	84.7603	226.282
Irrigated with bacteria Drought w/o bacteria	165.03	26.3992	8.84071	1.21427e-06	0.05	1	94.2691	235.791
Irrigated w/o bacteria Drought with bacteria	209.155	26.3992	11.2045	0	0.05	1	138.394	279.916
Irrigated w/o bacteria Drought w/o bacteria	218.664	26.3992	11.7139	0	0.05	1	147.903	289.425
Irrigated w/o bacteria Irrigated with bacteria	53.6341	26.3992	2.87319	0.19365	0.05	0	-17.1269	124.395
Interactions
Treatment	Treatment	MeanDiff	SEM	q Value	Prob	Alpha	Sig	LCL	UCL
Drought w/o bacteria	Drought with bacteria	-9.5088	37.3341	0.36019	1	0.05	0	-128.848	109.83
Irrigated with bacteria	Drought with bacteria	155.521	37.3341	5.89113	0.00367	0.05	1	36.1823	274.86
Irrigated with bacteria	Drought w/o bacteria	165.03	37.3341	6.25132	0.00173	0.05	1	45.6911	284.369
Irrigated w/o bacteria	Drought with bacteria	209.155	37.3341	7.92279	4.4017e-05	0.05	1	89.8164	328.494
Irrigated w/o bacteria	Drought w/o bacteria	218.664	37.3341	8.28298	1.95269e-05	0.05	1	99.3252	338.003
Irrigated w/o bacteria	Irrigated with bacteria	53.6341	37.3341	2.03165	0.83476	0.05	0	-65.7049	172.973
ANOVATwoWay (27.5)
Descriptive Statistics
Interaction
	N	Mean	SD	SEM	Variance	Missing	NonMissing
Drought with bacteria	6	18.008	4.2302	1.72697	17.8946	0	6
Drought w/o bacteria	6	21.6519	8.53951	3.48624	72.9232	0	6
Irrigated with bacteria	6	157.691	38.7427	15.8167	1501	0	6
Irrigated w/o bacteria	6	127.184	48.402	19.76	2342.75	0	6
Drought with bacteria	6	18.008	4.2302	1.72697	17.8946	0	6
Drought w/o bacteria	6	21.6519	8.53951	3.48624	72.9232	0	6
Irrigated with bacteria	6	157.691	38.7427	15.8167	1501	0	6
Irrigated w/o bacteria	6	127.184	48.402	19.76	2342.75	0	6
ANOVA
Overall ANOVA
	DF	Sum of Squares	Mean Square	F Value	P Value
Treatment	1	0	0	0	1
Bacteria	3	186055	62018.2	63.0495	3.23854e-15
Interaction	3	0	0	0	1
Model	7	186055	26579.2	27.0212	2.90464e-13
Error	40	39345.7	983.642	--	--
Corrected Total	47	225400	--	--	--
Means Comparisons
Tukey Test
Treatment
	MeanDiff	SEM	q Value	Prob	Alpha	Sig	LCL	UCL
Irrigated Drought	0	9.05374	0	1	0.05	0	-18.2983	18.2983
Bacteria
	MeanDiff	SEM	q Value	Prob	Alpha	Sig	LCL	UCL
Drought w/o bacteria Drought with bacteria	3.64393	12.8039	0.40248	0.99184	0.05	0	-30.676	37.9638
Irrigated with bacteria Drought with bacteria	139.683	12.8039	15.4282	6.41931e-07	0.05	1	105.363	174.003
Irrigated with bacteria Drought w/o bacteria	136.039	12.8039	15.0257	1.96402e-07	0.05	1	101.719	170.359
Irrigated w/o bacteria Drought with bacteria	109.176	12.8039	12.0586	0	0.05	1	74.8556	143.495
Irrigated w/o bacteria Drought w/o bacteria	105.532	12.8039	11.6561	0	0.05	1	71.2117	139.851
Irrigated w/o bacteria Irrigated with bacteria	-30.5075	12.8039	3.3696	0.0969	0.05	0	-64.8274	3.81236
Interactions
Treatment	Treatment	MeanDiff	SEM	q Value	Prob	Alpha	Sig	LCL	UCL
Drought w/o bacteria	Drought with bacteria	3.64393	18.1075	0.28459	1	0.05	0	-54.2368	61.5247
Irrigated with bacteria	Drought with bacteria	139.683	18.1075	10.9094	1.13407e-07	0.05	1	81.8023	197.564
Irrigated with bacteria	Drought w/o bacteria	136.039	18.1075	10.6248	1.22112e-07	0.05	1	78.1583	193.92
Irrigated w/o bacteria	Drought with bacteria	109.176	18.1075	8.52673	1.12497e-05	0.05	1	51.2948	167.056
Irrigated w/o bacteria	Drought w/o bacteria	105.532	18.1075	8.24213	2.14157e-05	0.05	1	47.6508	163.412
Irrigated w/o bacteria	Irrigated with bacteria	-30.5075	18.1075	2.38267	0.69657	0.05	0	-88.3883	27.3732
ANOVATwoWay (03.6)
Descriptive Statistics
Interaction
	N	Mean	SD	SEM	Variance	Missing	NonMissing
Drought with bacteria	6	8.46412	11.187	4.56706	125.148	0	6
Drought w/o bacteria	6	10.5644	11.4419	4.67115	130.918	0	6
Irrigated with bacteria	6	206.767	23.0481	9.40936	531.216	0	6
Irrigated w/o bacteria	6	226.819	85.6955	34.985	7343.72	0	6
Drought with bacteria	6	8.46412	11.187	4.56706	125.148	0	6
Drought w/o bacteria	6	10.5644	11.4419	4.67115	130.918	0	6
Irrigated with bacteria	6	206.767	23.0481	9.40936	531.216	0	6
Irrigated w/o bacteria	6	226.819	85.6955	34.985	7343.72	0	6
Descriptive Statistics
ANOVA
Overall ANOVA
	DF	Sum of Squares	Mean Square	F Value	P Value
Treatment	1	-2.91038e-11	-2.91038e-11	-1.43175e-14	--
Bacteria	3	518014	172671	84.9447	2.1408e-17
Interaction	3	-1.45519e-11	-4.85064e-12	-2.38624e-15	--
Model	7	518014	74002	36.4049	2.09429e-15
Error	40	81310	2032.75	--	--
Corrected Total	47	599324	--	--	--
Means Comparisons
Tukey Test
Treatment
	MeanDiff	SEM	q Value	Prob	Alpha	Sig	LCL	UCL
Irrigated Drought	0	13.0152	0	1	0.05	0	-26.3048	26.3048
Bacteria
	MeanDiff	SEM	q Value	Prob	Alpha	Sig	LCL	UCL
Drought w/o bacteria Drought with bacteria	2.10032	18.4063	0.16137	0.99946	0.05	0	-47.2363	51.4369
Irrigated with bacteria Drought with bacteria	198.303	18.4063	15.2363	6.3423e-07	0.05	1	148.967	247.64
Irrigated with bacteria Drought w/o bacteria	196.203	18.4063	15.0749	1.97012e-07	0.05	1	146.866	245.539
Irrigated w/o bacteria Drought with bacteria	218.355	18.4063	16.7769	0	0.05	1	169.019	267.692
Irrigated w/o bacteria Drought w/o bacteria	216.255	18.4063	16.6155	0	0.05	1	166.918	265.592
Irrigated w/o bacteria Irrigated with bacteria	20.0521	18.4063	1.54067	0.69794	0.05	0	-29.2845	69.3887
Interactions
Treatment	Treatment	MeanDiff	SEM	q Value	Prob	Alpha	Sig	LCL	UCL
Drought w/o bacteria	Drought with bacteria	2.10032	26.0304	0.11411	1	0.05	0	-81.1062	85.3069
Irrigated with bacteria	Drought with bacteria	198.303	26.0304	10.7737	1.33001e-07	0.05	1	115.097	281.51
Irrigated with bacteria	Drought w/o bacteria	196.203	26.0304	10.6595	1.14418e-07	0.05	1	112.996	279.409
Irrigated w/o bacteria	Drought with bacteria	218.355	26.0304	11.8631	5.98735e-08	0.05	1	135.149	301.562
Irrigated w/o bacteria	Drought w/o bacteria	216.255	26.0304	11.749	6.25435e-08	0.05	1	133.048	299.462
Irrigated w/o bacteria	Irrigated with bacteria	20.0521	26.0304	1.08942	0.99376	0.05	0	-63.1544	103.259
ANOVATwoWay (10.6)
Descriptive Statistics
Interaction
	N	Mean	SD	SEM	Variance	Missing	NonMissing
Drought with bacteria	6	2.3961	4.22315	1.72409	17.835	0	6
Drought w/o bacteria	6	4.45547	4.02768	1.64429	16.2222	0	6
Irrigated with bacteria	6	150.29	31.8119	12.9872	1012	0	6
Irrigated w/o bacteria	6	149.756	33.0996	13.5129	1095.59	0	6
Drought with bacteria	6	2.3961	4.22315	1.72409	17.835	0	6
Drought w/o bacteria	6	4.45547	4.02768	1.64429	16.2222	0	6
Irrigated with bacteria	6	150.29	31.8119	12.9872	1012	0	6
Irrigated w/o bacteria	6	149.756	33.0996	13.5129	1095.59	0	6
ANOVA
Overall ANOVA
	DF	Sum of Squares	Mean Square	F Value	P Value
Treatment	1	-7.27596e-12	-7.27596e-12	-1.35895e-14	--
Bacteria	3	257915	85971.5	160.571	2.4382e-22
Interaction	3	-3.63798e-12	-1.21266e-12	-2.26492e-15	--
Model	7	257915	36844.9	68.8162	2.70279e-20
Error	40	21416.4	535.41	--	--
Corrected Total	47	279331	--	--	--
Means Comparisons
Tukey Test
Treatment
	MeanDiff	SEM	q Value	Prob	Alpha	Sig	LCL	UCL
Irrigated Drought	0	6.67964	0	1	0.05	0	-13.5001	13.5001
Bacteria
	MeanDiff	SEM	q Value	Prob	Alpha	Sig	LCL	UCL
Drought w/o bacteria Drought with bacteria	2.05936	9.44643	0.3083	0.99628	0.05	0	-23.261	27.3798
Irrigated with bacteria Drought with bacteria	147.893	9.44643	22.141	0	0.05	1	122.573	173.214
Irrigated with bacteria Drought w/o bacteria	145.834	9.44643	21.8326	0	0.05	1	120.514	171.155
Irrigated w/o bacteria Drought with bacteria	147.359	9.44643	22.061	0	0.05	1	122.039	172.68
Irrigated w/o bacteria Drought w/o bacteria	145.3	9.44643	21.7527	0	0.05	1	119.98	170.62
Irrigated w/o bacteria Irrigated with bacteria	-0.53401	9.44643	0.07995	0.99993	0.05	0	-25.8544	24.7864
Interactions
Treatment	Treatment	MeanDiff	SEM	q Value	Prob	Alpha	Sig	LCL	UCL
Drought w/o bacteria	Drought with bacteria	2.05936	13.3593	0.218	1	0.05	0	-40.6437	44.7624
Irrigated with bacteria	Drought with bacteria	147.893	13.3593	15.656	9.72896e-09	0.05	1	105.19	190.597
Irrigated with bacteria	Drought w/o bacteria	145.834	13.3593	15.438	1.08874e-08	0.05	1	103.131	188.537
Irrigated w/o bacteria	Drought with bacteria	147.359	13.3593	15.5995	9.9266e-09	0.05	1	104.656	190.063
Irrigated w/o bacteria	Drought w/o bacteria	145.3	13.3593	15.3815	1.10879e-08	0.05	1	102.597	188.003
Irrigated w/o bacteria	Irrigated with bacteria	-0.53401	13.3593	0.05653	1	0.05	0	-43.2371	42.169
ANOVATwoWay (16.6)
Descriptive Statistics
Interaction
	N	Mean	SD	SEM	Variance	Missing	NonMissing
Drought with bacteria	6	59.5556	20.2519	8.26781	410.14	0	6
Drought w/o bacteria	6	62.3386	32.6487	13.3288	1065.94	0	6
Irrigated with bacteria	6	251.336	30.0243	12.2574	901.46	0	6
Irrigated w/o bacteria	6	268.717	77.1983	31.516	5959.57	0	6
Drought with bacteria	6	59.5556	20.2519	8.26781	410.14	0	6
Drought w/o bacteria	6	62.3386	32.6487	13.3288	1065.94	0	6
Irrigated with bacteria	6	251.336	30.0243	12.2574	901.46	0	6
						0	5
ANOVA
Overall ANOVA
	DF	Sum of Squares	Mean Square	F Value	P Value
Treatment	1	48.7486	48.7486	0.02336	0.8793
Bacteria	3	474374	158125	75.7856	2.52538e-16
Interaction	3	139.444	46.4812	0.02228	0.99542
Model	7	474805	67829.3	32.5091	2.27131e-14
Error	39	81372.4	2086.47	--	--
Corrected Total	46	556178	--	--	--
Means Comparisons
Tukey Test
Treatment
	MeanDiff	SEM	q Value	Prob	Alpha	Sig	LCL	UCL
Irrigated Drought	-2.93124	13.3286	0.31101	0.82708	0.05	0	-29.891	24.0285
Bacteria
	MeanDiff	SEM	q Value	Prob	Alpha	Sig	LCL	UCL
Drought w/o bacteria Drought with bacteria	2.78306	18.6479	0.21106	0.99879	0.05	0	-47.2562	52.8223
Irrigated with bacteria Drought with bacteria	191.78	18.6479	14.5441	2.01313e-07	0.05	1	141.741	241.819
Irrigated with bacteria Drought w/o bacteria	188.997	18.6479	14.3331	3.8953e-08	0.05	1	138.958	239.036
Irrigated w/o bacteria Drought with bacteria	212.871	19.067	15.7888	4.2278e-08	0.05	1	161.707	264.035
Irrigated w/o bacteria Drought w/o bacteria	210.088	19.067	15.5824	4.18389e-08	0.05	1	158.924	261.252
Irrigated w/o bacteria Irrigated with bacteria	21.0909	19.067	1.56432	0.68794	0.05	0	-30.073	72.2548
Treatment
	MeanDiff	SEM	q Value	Prob	Alpha	Sig	LCL	UCL
Irrigated Drought	-2.93124	13.3286	0.31101	0.82708	0.05	0	-29.891	24.0285
Interactions
Treatment	Treatment	MeanDiff	SEM	q Value	Prob	Alpha	Sig	LCL	UCL
Drought w/o bacteria	Drought with bacteria	2.78306	26.3722	0.14924	1	0.05	0	-81.6309	87.197
Irrigated with bacteria	Drought with bacteria	191.78	26.3722	10.2843	2.79273e-07	0.05	1	107.366	276.194
Irrigated with bacteria	Drought w/o bacteria	188.997	26.3722	10.135	4.12014e-07	0.05	1	104.583	273.411
Irrigated w/o bacteria	Drought with bacteria	209.161	26.3722	11.2163	6.18366e-08	0.05	1	124.747	293.575
Irrigated w/o bacteria	Drought w/o bacteria	206.378	26.3722	11.0671	7.48256e-08	0.05	1	121.964	290.792
Irrigated w/o bacteria	Irrigated with bacteria	17.3808	26.3722	0.93205	0.99761	0.05	0	-67.0332	101.795
ANOVATwoWay (27.6)
Descriptive Statistics
Interaction
	N	Mean	SD	SEM	Variance	Missing	NonMissing
Drought with bacteria	6	17.3356	23.7474	9.69485	563.941	0	6
Drought w/o bacteria	6	2.69235	1.87846	0.76688	3.52861	0	6
Irrigated with bacteria	6	157.501	48.9388	19.9792	2395	0	6
Irrigated w/o bacteria	6	137.015	94.0064	38.3779	8837.2	0	6
Drought with bacteria	6	17.3356	23.7474	9.69485	563.941	0	6
Drought w/o bacteria	6	2.69235	1.87846	0.76688	3.52861	0	6
Irrigated with bacteria	6	157.501	48.9388	19.9792	2395	0	6
Irrigated w/o bacteria	6	137.015	94.0064	38.3779	8837.2	0	6
ANOVA
Overall ANOVA
	DF	Sum of Squares	Mean Square	F Value	P Value
Treatment	1	-1.45519e-11	-1.45519e-11	-4.93299e-15	--
Bacteria	3	229836	76612	25.9709	1.72272e-09
Interaction	3	0	0	0	1
Model	7	229836	32833.7	11.1304	1.01936e-07
Error	40	117997	2949.92	--	--
Corrected Total	47	347833	--	--	--
Tukey Test
Treatment
	MeanDiff	SEM	q Value	Prob	Alpha	Sig	LCL	UCL
Irrigated Drought	0	15.6789	0	1	0.05	0	-31.6882	31.6882
Bacteria
	MeanDiff	SEM	q Value	Prob	Alpha	Sig	LCL	UCL
Drought w/o bacteria Drought with bacteria	-14.6432	22.1732	0.93395	0.91125	0.05	0	-74.0768	44.7904
Irrigated with bacteria Drought with bacteria	140.165	22.1732	8.93976	9.65033e-07	0.05	1	80.7316	199.599
Irrigated with bacteria Drought w/o bacteria	154.808	22.1732	9.87371	9.65554e-08	0.05	1	95.3748	214.242
Irrigated w/o bacteria Drought with bacteria	119.68	22.1732	7.6332	1.91814e-05	0.05	1	60.2463	179.113
Irrigated w/o bacteria Drought w/o bacteria	134.323	22.1732	8.56715	2.28132e-06	0.05	1	74.8895	193.757
Irrigated w/o bacteria Irrigated with bacteria	-20.4853	22.1732	1.30656	0.79227	0.05	0	-79.9189	38.9483
Interactions
Treatment	MeanDiff	q Value	Prob	Alpha	Sig	LCL	UCL
Drought with bacteria	31.3577	0.6604	0.99974	0.05	0	-114.879	85.5921
Drought with bacteria	31.3577	6.32136	0.00149	0.05	1	39.9299	240.4
Drought w/o bacteria	31.3577	6.98176	0.000357856	0.05	1	54.5731	255.044
Drought with bacteria	31.3577	5.39749	0.00989	0.05	1	19.4446	219.915
Drought w/o bacteria	31.3577	6.05789	0.0026	0.05	1	34.0878	234.558
Irrigated with bacteria	31.3577	0.92388	0.99775	0.05	0	-120.721	79.75
ANOVATwoWay (2.7)
Descriptive Statistics
Interaction
	N	Mean	SD	SEM	Variance	Missing	NonMissing
Drought with bacteria	6	26.4629	29.3288	11.9734	860.181	0	6
Drought w/o bacteria	6	49.3096	72.1147	29.4407	5200.53	0	6
Irrigated with bacteria	6	119.813	53.3378	21.7751	2844.92	0	6
Irrigated w/o bacteria	6	121.869	38.3435	15.6537	1470.22	0	6
Drought with bacteria	6	119.813	53.3378	21.7751	2844.92	0	6
Drought w/o bacteria	6	121.869	38.3435	15.6537	1470.22	0	6
Irrigated with bacteria	6	119.813	53.3378	21.7751	2844.92	0	6
Irrigated w/o bacteria	6	121.869	38.3435	15.6537	1470.22	0	6
ANOVATwoWay (14/06/2021 09:19:54)
ANOVA
Overall ANOVA
	DF	Sum of Squares	Mean Square	F Value	P Value
Treatment	1	20644.5	20644.5	8.6896	0.00532
Bacteria	3	21600	7200	3.0306	0.04035
Interaction	3	21292.9	7097.62	2.98751	0.04233
Model	7	63537.3	9076.76	3.82056	0.00288
Error	40	95030.7	2375.77	--	--
Corrected Total	47	158568	--	--	--
Means Comparisons
Tukey Test
Treatment
	MeanDiff	SEM	q Value	Prob	Alpha	Sig	LCL	UCL
Irrigated Drought	41.4774	14.0706	4.16884	0.00532	0.05	1	13.0396	69.9151
Bacteria
	MeanDiff	SEM	q Value	Prob	Alpha	Sig	LCL	UCL
Drought w/o bacteria Drought with bacteria	12.4512	19.8988	0.88491	0.9232	0.05	0	-40.8858	65.7883
Irrigated with bacteria Drought with bacteria	46.6751	19.8988	3.31722	0.10473	0.05	0	-6.66195	100.012
Irrigated with bacteria Drought w/o bacteria	34.2239	19.8988	2.4323	0.32704	0.05	0	-19.1132	87.5609
Irrigated w/o bacteria Drought with bacteria	48.7308	19.8988	3.46332	0.08409	0.05	0	-4.60621	102.068
Irrigated w/o bacteria Drought w/o bacteria	36.2796	19.8988	2.57841	0.27771	0.05	0	-17.0574	89.6167
Irrigated w/o bacteria Irrigated with bacteria	2.05574	19.8988	0.1461	0.9996	0.05	0	-51.2813	55.3928
Interactions
Treatment	Treatment	MeanDiff	SEM	q Value	Prob	Alpha	Sig	LCL	UCL
Drought w/o bacteria	Drought with bacteria	22.8467	28.1411	1.14815	0.99144	0.05	0	-67.1067	112.8
Irrigated with bacteria	Drought with bacteria	93.3502	28.1411	4.69125	0.03711	0.05	1	3.39683	183.304
Irrigated with bacteria	Drought w/o bacteria	70.5035	28.1411	3.54311	0.22264	0.05	0	-19.4499	160.457
Irrigated w/o bacteria	Drought with bacteria	95.4059	28.1411	4.79456	0.03085	0.05	1	5.45257	185.359
Irrigated w/o bacteria	Drought w/o bacteria	72.5592	28.1411	3.64642	0.19393	0.05	0	-17.3941	162.513
Irrigated w/o bacteria	Irrigated with bacteria	2.05574	28.1411	0.10331	1	0.05	0	-87.8976	92.0091
ANOVATwoWay (11.7)
Descriptive Statistics
Interaction
	N	Mean	SD	SEM	Variance	Missing	NonMissing
Drought with bacteria	6	77.2086	94.2579	38.4806	8884.55	0	6
Drought w/o bacteria	6	56.8868	91.4079	37.3171	8355.4	0	6
Irrigated with bacteria	6	165.598	73.1742	29.8732	5354.47	0	6
Irrigated w/o bacteria	6	177.26	77.5402	31.6557	6012.48	0	6
Drought with bacteria	6	77.2086	94.2579	38.4806	8884.55	0	6
Drought w/o bacteria	6	56.8868	91.4079	37.3171	8355.4	0	6
Irrigated with bacteria	6	165.598	73.1742	29.8732	5354.47	0	6
Irrigated w/o bacteria	6	177.26	77.5402	31.6557	6012.48	0	6
ANOVA
Overall ANOVA
	DF	Sum of Squares	Mean Square	F Value	P Value
Treatment	1	-5.82077e-11	-5.82077e-11	-8.13897e-15	--
Bacteria	3	134039	44679.8	6.24742	0.0014
Interaction	3	-5.82077e-11	-1.94026e-11	-2.71299e-15	--
Model	7	134039	19148.5	2.67746	0.02264
Error	40	286069	7151.72	--	--
Corrected Total	47	420108	--	--	--
Means Comparisons
Tukey Test
Treatment
	MeanDiff	SEM	q Value	Prob	Alpha	Sig	LCL	UCL
Irrigated Drought	0	24.4126	0	1	0.05	0	-49.3399	49.3399
Bacteria
	MeanDiff	SEM	q Value	Prob	Alpha	Sig	LCL	UCL
Drought w/o bacteria Drought with bacteria	-20.3218	34.5247	0.83243	0.93494	0.05	0	-112.862	72.2189
Irrigated with bacteria Drought with bacteria	88.3899	34.5247	3.62066	0.06581	0.05	0	-4.15074	180.931
Irrigated with bacteria Drought w/o bacteria	108.712	34.5247	4.45309	0.01573	0.05	1	16.171	201.252
Irrigated w/o bacteria Drought with bacteria	100.051	34.5247	4.09833	0.02969	0.05	1	7.51047	192.592
Irrigated w/o bacteria Drought w/o bacteria	120.373	34.5247	4.93076	0.00635	0.05	1	27.8322	212.913
Irrigated w/o bacteria Irrigated with bacteria	11.6612	34.5247	0.47767	0.98653	0.05	0	-80.8794	104.202
Interactions
Treatment	Treatment	MeanDiff	SEM	q Value	Prob	Alpha	Sig	LCL	UCL
Drought w/o bacteria	Drought with bacteria	-20.3218	48.8253	0.58862	0.99988	0.05	0	-176.392	135.749
Irrigated with bacteria	Drought with bacteria	88.3899	48.8253	2.56019	0.61703	0.05	0	-67.6806	244.46
Irrigated with bacteria	Drought w/o bacteria	108.712	48.8253	3.14881	0.3584	0.05	0	-47.3589	264.782
Irrigated w/o bacteria	Drought with bacteria	100.051	48.8253	2.89796	0.46361	0.05	0	-56.0194	256.122
Irrigated w/o bacteria	Drought w/o bacteria	120.373	48.8253	3.48657	0.23958	0.05	0	-35.6977	276.443
Irrigated w/o bacteria	Irrigated with bacteria	11.6612	48.8253	0.33776	1	0.05	0	-144.409	167.732
ANOVATwoWay (20.7)
Descriptive Statistics
Interaction
	N	Mean	SD	SEM	Variance	Missing	NonMissing
Drought with bacteria	6	256.671	190.438	77.746	36266.7	0	6
Drought w/o bacteria	6	374.786	99.1276	40.4687	9826.28	0	6
Irrigated with bacteria	6	390.078	195.664	79.8794	38284.3	0	6
Irrigated w/o bacteria	6	361.333	182.974	74.699	33479.7	0	6
Drought with bacteria	6	256.671	190.438	77.746	36266.7	0	6
Drought w/o bacteria	6	374.786	99.1276	40.4687	9826.28	0	6
Irrigated with bacteria	6	390.078	195.664	79.8794	38284.3	0	6
Irrigated w/o bacteria	6	361.333	182.974	74.699	33479.7	0	6
ANOVA
Overall ANOVA
	DF	Sum of Squares	Mean Square	F Value	P Value
Treatment	1	-2.32831e-10	-2.32831e-10	-7.90215e-15	--
Bacteria	3	131833	43944.2	1.49144	0.23148
Interaction	3	-2.32831e-10	-7.76102e-11	-2.63405e-15	--
Model	7	131833	18833.2	0.63919	0.72079
Error	40	1.17857e+06	29464.2	--	--
Corrected Total	47	1.3104e+06	--	--	--
Means Comparisons
Tukey Test
Treatment
	MeanDiff	SEM	q Value	Prob	Alpha	Sig	LCL	UCL
Irrigated Drought	0	49.5515	0	1	0.05	0	-100.148	100.148
Bacteria
	MeanDiff	SEM	q Value	Prob	Alpha	Sig	LCL	UCL
Drought w/o bacteria Drought with bacteria	118.115	70.0764	2.38369	0.34453	0.05	0	-69.7187	305.95
Irrigated with bacteria Drought with bacteria	133.408	70.0764	2.6923	0.24275	0.05	0	-54.4265	321.242
Irrigated with bacteria Drought w/o bacteria	15.2922	70.0764	0.30861	0.99627	0.05	0	-172.542	203.126
Irrigated w/o bacteria Drought with bacteria	104.662	70.0764	2.11219	0.45079	0.05	0	-83.1718	292.497
Irrigated w/o bacteria Drought w/o bacteria	-13.453	70.0764	0.2715	0.99745	0.05	0	-201.287	174.381
Irrigated w/o bacteria Irrigated with bacteria	-28.7452	70.0764	0.58011	0.97639	0.05	0	-216.579	159.089
Interactions
Treatment	Treatment	MeanDiff	SEM	q Value	Prob	Alpha	Sig	LCL	UCL
Drought w/o bacteria	Drought with bacteria	118.115	99.103	1.68552	0.9296	0.05	0	-198.668	434.899
Irrigated with bacteria	Drought with bacteria	133.408	99.103	1.90375	0.87526	0.05	0	-183.376	450.191
Irrigated with bacteria	Drought w/o bacteria	15.2922	99.103	0.21822	1	0.05	0	-301.492	332.076
Irrigated w/o bacteria	Drought with bacteria	104.662	99.103	1.49355	0.96212	0.05	0	-212.121	421.446
Irrigated w/o bacteria	Drought w/o bacteria	-13.453	99.103	0.19198	1	0.05	0	-330.237	303.331
Irrigated w/o bacteria	Irrigated with bacteria	-28.7452	99.103	0.4102	0.99999	0.05	0	-345.529	288.039

## Sheet: (D) Descriptive statist Biomass
(D) Biomass
Descriptive Statistics
ANOVATwoWay
Treatment	N	Mean	SD	SEM	Variance	Missing	NonMissing
Drought	12	13.4533	18.3244	7.48089	335.783	6	6
Irrigated	12	170.625	48.5972	14.6526	2361.69	1	11
Bacteria	N	Mean	SD	SEM	Variance	Missing	NonMissing
with Bacteria	12	101.582	74.9053	26.483	5610.81	4	8
without Bacteria	12	127.216	99.4632	33.1544	9892.93	3	9
Overall	N	Mean	SD	SEM	Variance	Missing	NonMissing
	24	115.153	87.0352	21.1091	7575.12	7	17
Interaction		N	Mean	SD	SEM	Variance	Missing	NonMissing
Drought	with Bacteria	6	22.37	23.905	13.8016	571.45	3	3
Drought	without Bacteria	6	4.53667	5.43008	3.13506	29.4857	3	3
Irrigated	with Bacteria	6	149.11	44.7621	20.0182	2003.65	1	5
Irrigated	without Bacteria	6	188.555	47.6633	19.4584	2271.79	0	6
ANOVA
Overall ANOVA
	DF	Sum of Squares	Mean Square	F Value	P Value
Treatment	1	93455.6	93455.6	59.0473	3.4655e-06
Bacteria	1	451.998	451.998	0.28558	0.60209
Interaction	1	3174.97	3174.97	2.00602	0.18019
Model	3	100626	33542.2	21.1927	2.7677e-05
Error	13	20575.4	1582.72	--	--
Corrected Total	16	121202	--	--	--
Means Comparisons
Scheffe Test
Treatment
	MeanDiff	SEM	F Value	Prob	Alpha	Sig	LCL	UCL
Irrigated Drought	157.172	20.1909	60.5956	3.01228e-06	0.05	1	113.552	200.792
Bacteria
	MeanDiff	SEM	F Value	Prob	Alpha	Sig	LCL	UCL
without Bacteria with Bacteria	25.6331	19.3313	1.75824	0.20767	0.05	0	-16.1297	67.3958
Interactions
Treatment	Bacteria	Treatment	Bacteria	MeanDiff	SEM	F Value	Prob	Alpha	Sig	LCL	UCL
Drought	without Bacteria	Drought	with Bacteria	-17.8333	32.4831	0.10047	0.95832	0.05	0	-121.736	86.0698
Irrigated	with Bacteria	Drought	with Bacteria	126.74	29.0537	6.34311	0.00696	0.05	1	33.8062	219.674
Irrigated	with Bacteria	Drought	without Bacteria	144.573	29.0537	8.25375	0.00249	0.05	1	51.6395	237.507
Irrigated	without Bacteria	Drought	with Bacteria	166.185	28.1312	11.6329	0.000553301	0.05	1	76.2022	256.168
Irrigated	without Bacteria	Drought	without Bacteria	184.018	28.1312	14.2635	0.000209748	0.05	1	94.0356	274.001
Irrigated	without Bacteria	Irrigated	with Bacteria	39.445	24.0901	0.89369	0.47044	0.05	0	-37.6116	116.502
