# Supplementary material for: A dynamic rhizosphere interplay between tree roots and soil bacteria under drought stress
Source: eLife. 2022 Jul 20;11:e79679. doi: 10.7554/eLife.79679 (PMC9385208; doi:10.7554/eLife.79679)
Supplement: Figure 2—source data 2. [file elife-79679-fig2-data2.xlsx]

## Sheet: Legened
Source Data S3: Total organic carbon (TOC) in exudate solutions from roots of irrigated and drought-exposed Cupressus sempervirens saplings, with and without bacterial noculations.
(A) Raw Data and fold change of TOC of Drought and Re-Irrigated peirod
(B) Statistical results of fold change of TOC Drought peirod
(C) Statistical results of fold change of TOC of Re-Irrigated peirod
The analyses of the total amount of carbon were done compared to the zero time of the experiment. At this time, samples were also taken,
and all the experimental groups were under similar conditions. There are slight differences between the individual trees in the experiments from the beginning.
Therefore the measurements describing how much a quantity changes between the start point and a subsequent measurements (fold changes) for each individual tree. Only then were statistical analyses done.
i

## Sheet:  (A)
Total organic carbon			09.05.19	20.05.19	18.06.19	Drought period	Irrigated period
Saplling No.	Treatment	Bacteria	Before Drought	Drought after Bacteria Inoculation	Re-Irrigation after Bacteria Inoculation	Fold change	Fold changes
1	Drought	with bacteria	0.489021	1.45745	0.502152	2.98034	1.02685
2	Drought	with bacteria	0.402561	1.02851	0.228558	2.55491	0.56776
3	Drought	with bacteria	0.293532	0.941109	0.501515	3.20615	1.70855
4	Drought	with bacteria	0.293358	0.639626	0.115328	2.18036	0.39313
5	Drought	with bacteria	0.545242	2.33437	0.275342	4.28135	0.50499
6	Drought	with bacteria	0.432173	1.3161	0.644349	3.04531	1.49095
1	Drought	w/o bacteria	0.737182	1.44595	0.746235	1.96145	1.01228
2	Drought	w/o bacteria	0.944527	2.68319	0.644158	2.84078	0.68199
3	Drought	w/o bacteria	0.988805	1.07414	4.57137	1.0863	4.62313
4	Drought	w/o bacteria	1.27719	1.435	1.29243	1.12356	1.01193
5	Drought	w/o bacteria	0.553768	0.880968	0.450945	1.59086	0.81432
6	Drought	w/o bacteria	0.486243	0.821377	0.362125	1.68923	0.74474
1	Irrigated	with bacteria	0.563893	0.659444	0.695443	1.16945	1.23329
2	Irrigated	with bacteria	0.775503	6.08976	3.50954	7.85266	4.52551
3	Irrigated	with bacteria	0.298135	1.72117	1.05323	5.77311	3.53272
4	Irrigated	with bacteria	0.762814	6.69225	4.21493	8.77311	5.52551
5	Irrigated	with bacteria	0.634263	4.29594	1.11962	6.77311	1.76523
6	Irrigated	with bacteria	0.538466	3.2241	1.60994	5.98756	2.98987
1	Irrigated	w/o bacteria	0.714286	1.82244	0.921829	2.55142	1.29056
2	Irrigated	w/o bacteria	0.538519	1.60576	0.484661	2.98181	0.89999
3	Irrigated	w/o bacteria	0.815429	0.83645	1.00132	1.02578	11.228
4	Irrigated	w/o bacteria	0.214654	0.424943	0.364621	2.02354	1.73629
5	Irrigated	w/o bacteria	0.47849	1.07817	0.415492	2.25328	0.86834
6	Irrigated	w/o bacteria	0.625326	1.30678	1.44994	2.08976	2.31869

## Sheet: (B)
Drought peirod ANOVATwoWay
Descriptive Statistics
Treatment
	N	Mean	SD	SEM	Variance	Missing	NonMissing
Drought	12	2.37838	0.9492	0.27401	0.90098	0	12
Irrigated	12	4.10455	2.74489	0.79238	7.5344	0	12
Bacteria
	N	Mean	SD	SEM	Variance	Missing	NonMissing
with Bacteria	12	4.54812	2.42856	0.70106	5.89788	0	12
without Bacteria	12	1.93481	0.66156	0.19098	0.43766	0	12
Overall
	N	Mean	SD	SEM	Variance	Missing	NonMissing
	24	3.24147	2.19354	0.44775	4.81161	0	24
Interaction
		N	Mean	SD	SEM	Variance	Missing	NonMissing
Drought	with Bacteria	6	3.0414	0.71364	0.29134	0.50928	0	6
Drought	without Bacteria	6	1.71536	0.64641	0.2639	0.41785	0	6
Irrigated	with Bacteria	6	6.05483	2.64908	1.08148	7.0176	0	6
Irrigated	without Bacteria	6	2.15427	0.6553	0.26753	0.42942	0	6
ANOVA
Overall ANOVA
	DF	Sum of Squares	Mean Square	F Value	P Value
Treatment	1	17.8779	17.8779	8.53956	0.00842
Bacteria	1	40.9761	40.9761	19.5727	0.000261115
Interaction	1	9.94229	9.94229	4.74904	0.04144
Model	3	68.7963	22.9321	10.9538	0.00018009
Error	20	41.8708	2.09354	--	--
Corrected Total	23	110.667	--	--	--
Means Comparisons
Tukey Test
Treatment
	MeanDiff	SEM	q Value	Prob	Alpha	Sig	LCL	UCL
Irrigated Drought	1.72617	0.5907	4.13269	0.00843	0.05	1	0.49398	2.95835
Bacteria
	MeanDiff	SEM	q Value	Prob	Alpha	Sig	LCL	UCL
without Bacteria with Bacteria	-2.6133	0.5907	6.25662	0.000261209	0.05	1	-3.84549	-1.38112
Interactions
Treatment	Bacteria	Treatment	Bacteria	MeanDiff	SEM	q Value	Prob	Alpha	Sig	LCL	UCL
Drought	without Bacteria	Drought	with Bacteria	1.32604	0.83537	2.24487	0.04078	0.05	1	0.66417	1.01209
Irrigated	with Bacteria	Drought	with Bacteria	3.01343	0.83537	5.10148	0.00877	0.05	1	0.6753	5.35156
Irrigated	with Bacteria	Drought	without Bacteria	4.33947	0.83537	7.34635	0.000238709	0.05	1	2.00134	6.6776
Irrigated	without Bacteria	Drought	with Bacteria	-0.88714	0.83537	1.50185	0.71582	0.05	0	-3.22527	1.45099
Irrigated	without Bacteria	Drought	without Bacteria	0.4389	0.83537	0.74302	0.95194	0.05	0	-1.89923	2.77703
Irrigated	without Bacteria	Irrigated	with Bacteria	3.90057	0.83537	6.60333	0.000785868	0.05	1	1.2387	1.56244

## Sheet: (C)
Re-Irrigated peirod ANOVATwoWay
Descriptive Statistics
Treatment	N	Mean	SD	SEM	Variance	Missing	NonMissing
Drought	12	1.21505	1.14086	0.32934	1.30156	0	12
Irrigated	12	3.1595	2.93825	0.8482	8.63334	0	12
Bacteria	N	Mean	SD	SEM	Variance	Missing	NonMissing
with Bacteria	12	2.10536	1.67348	0.48309	2.80052	0	12
without Bacteria	12	2.26919	3.03019	0.87474	9.18203	0	12
Overall	N	Mean	SD	SEM	Variance	Missing	NonMissing
	24	2.18727	2.39537	0.48895	5.73779	0	24
Interaction
		N	Mean	SD	SEM	Variance	Missing	NonMissing
Drought	with Bacteria	6	0.94871	0.55284	0.2257	0.30563	0	6
Drought	without Bacteria	6	1.4814	1.54516	0.63081	2.38753	0	6
Irrigated	with Bacteria	6	3.26202	1.62624	0.66391	2.64465	0	6
Irrigated	without Bacteria	6	3.05697	4.04023	1.64942	16.3235	0	6
ANOVA
Overall ANOVA
	DF	Sum of Squares	Mean Square	F Value	P Value
Treatment	1	22.6852	22.6852	4.18908	0.05405
Bacteria	1	0.16103	0.16103	0.02974	0.86482
Interaction	1	0.81639	0.81639	0.15076	0.70192
Model	3	23.6626	7.88755	1.45652	0.25641
Error	20	108.306	5.41532	--	--
Corrected Total	23	131.969	--	--	--
Means Comparisons
Tukey Test
Treatment
	MeanDiff	SEM	q Value	Prob	Alpha	Sig	LCL	UCL
Irrigated Drought	1.94445	0.95003	2.8945	0.05405	0.05	0	-0.0373	3.92619
Bacteria
	MeanDiff	SEM	q Value	Prob	Alpha	Sig	LCL	UCL
without Bacteria with Bacteria	0.16382	0.95003	0.24387	0.86483	0.05	0	-1.81792	2.14556
Interactions
Treatment	Bacteria	Treatment	Bacteria	MeanDiff	SEM	q Value	Prob	Alpha	Sig	LCL	UCL
Drought	without Bacteria	Drought	with Bacteria	2.57648	1.34354	0.56071	0.03978	0.05	1	0.25349	12.4175
Irrigated	with Bacteria	Drought	with Bacteria	2.31332	1.34354	2.435	0.33903	0.05	0	-1.44713	6.07377
Irrigated	with Bacteria	Drought	without Bacteria	1.78062	1.34354	1.87428	0.55827	0.05	0	-1.97983	5.54107
Irrigated	without Bacteria	Drought	with Bacteria	2.10827	1.34354	2.21916	0.41762	0.05	0	-1.65218	5.86872
Irrigated	without Bacteria	Drought	without Bacteria	1.57558	1.34354	1.65845	0.65032	0.05	0	-2.18488	5.33603
Irrigated	without Bacteria	Irrigated	with Bacteria	3.32658	1.34354	0.21583	0.04869	0.05	1	0.18984	6.46732
