# Supplementary material for: A dynamic rhizosphere interplay between tree roots and soil bacteria under drought stress
Source: eLife. 2022 Jul 20;11:e79679. doi: 10.7554/eLife.79679 (PMC9385208; doi:10.7554/eLife.79679)
Supplement: Figure 3—source data 1. [file elife-79679-fig3-data1.xlsx]

## Sheet: Legend
Source Data4: Root exudates polar metabolites in LC-MS experiment.
(A) Annotation of polar metabolites (detected by LC-MS) at the heatmaps (Fig 3. B and S5 B).
(B) Fold change of a given polar metabolite (detected by LC-MS) enriched in exudates of drought treated trees as compared to irrigated treated trees.
The fold change of metabolites that significantly changed (n=4).
(C) Fold change of a given polar metabolite (detected by LC-MS) enriched in exudates during re-irrigated of (1) re-irrigation treated trees as compared to irrigation treated (2) re-irrigation with bacteria treated trees as compared to irrigated w/o bacteria.
The fold change of metabolites that significantly changed (n=4).
(D) Fold change of a given polar metabolite (detected by LC-MS) enriched in exudates of drought with bacteria treated trees as compared to drought treated trees.
The fold change of metabolites that significantly changed (n=4).
(E) Annotation of polar metabolites (detected by LC-MS) that significantly changed in exudates under drought.
(F) Anova of a given polar metabolite (detected by LC-MS) in Drought peirod
(G) Anova of a given polar metabolite (detected by LC-MS) in Reirrigate peirod

## Sheet: (A)
	Metabolite
1	1-METHYLGUANINE
2	1-METHYLURIC ACID
3	1-PHENYL-1,2-PROPANEDIONE
4	2-(4-HYDROXYPHENYL)PROPIONIC ACID
5	2,3-DIHYDROXYBENZOATE
6	2,4,6-TRIHYDROXYBENZOIC ACID
7	2,6-DIHYDROXYPYRIDINE
8	2,6-DIMETHOXYBENZOIC ACID
9	2-AMINOADIPIC ACID
10	2-HYDROXY-2-(4-HYDROXYPHENYL)ACETIC ACID
11	2-HYDROXY-5-METHOXYBENZOIC ACID
12	2-ISOPROPYLMALIC ACID
13	2-KETO-3-DEOXYOCTONATE
14	3-(2-HYDROXYPHENYL)PROPANOATE
15	3-(3-METHOXYPHENYL)PROPIONIC ACID
16	3-(4-HYDROXY-3-METHOXY-PHENYL)-PROPIONIC ACID
17	3,4 DIHYDROXYMANDELATE
18	3,4,5-TRIMETHOXYCINNAMIC ACID
19	3,4-DIHYDROXYBENZALDEHYDE
20	3,4-DIHYDROXYBENZOATE
21	3,4-DIMETHOXYPHENYLACETIC ACID
22	3,5-DIMETHOXYPHENOL
23	3-AMINO-4-HYDROXYBENZOATE
24	3-DEHYDROSHIKIMATE
25	3-HYDROXYBUTYRIC ACID
26	3-HYDROXYMETHYLGLUTARATE
27	3-METHOXY-4-HYDROXYMANDELATE
28	3-METHYL-L-HISTIDINE
29	3-METHYLXANTHINE
30	3-PHENYLLACTIC ACID
31	4-AMINOSALICYLIC ACID
32	4-GUANIDINOBUTYRIC ACID
33	4-HYDROXY-3,5-DIMETHOXY-BENZOIC ACID
34	4-HYDROXY-3-METHYLBENZOIC ACID
35	4-HYDROXYCYCLOHEXANECARBOXYLIC ACID
36	4-NITROPHENOL
37	4-PYRIDOXATE
38	5-KETO-D-GLUCONIC ACID
39	6-AMINOHEXANOIC ACID
40	6-HYDROXYNICOTINATE
41	6-OXO-2-PIPERIDINECARBOXYLIC ACID
42	ADENINE
43	ADENOSINE
44	ALANINE
45	ALLANTOIC ACID
46	ALLANTOIN
47	ALLOSE
48	ALPHA-SANTONIN
49	ANTHRANILATE
50	ARABINOSE
51	ARABITOL
52	ARGININE
53	ARGININOSUCCINIC ACID
54	ASPARAGINE
55	ASPARTATE
56	BETAINE
57	CITRAMALATE
58	CITRULLINE
59	CREATINE
60	CYTIDINE
61	D-CHIRO-INOSITOL
62	DEOXYCYTIDINE
63	DIHYDROOROTATE
64	D-SEDOHEPTULOSE
65	D-SORBITOL
66	ETHYLMALONATE
67	FERULIC ACID
68	FRUCTOSE
69	GAMMA-AMINOBUTYRATE
70	GLUCONATE
71	GLUCOSAMINATE
72	GLUCOSE 6-PHOSPHATE
73	GLUCURONATE
74	GLUTAMATE
75	GLUTAMINE
76	GLYCERATE
77	GLYCEROL 3-PHOSPHATE
78	GLYOXYLATE
79	GUANINE
80	GUANOSINE
81	GULONIC ACID GAMMA-LACTONE
82	HYDROXYPHENYLLACTATE
83	HYPOXANTHINE
84	INDOLE-3-ACETATE
85	INDOLE-3-CARBOXYLIC ACID
86	INDOLE-3-LACTIC ACID
87	INOSINE
88	ISOLEUCINE
89	ISOMALTOTRIOSE
90	ISONICOTINIC ACID
91	ISOVALERALDEHYDE
92	KYNURENATE
93	LACTOBIONIC ACID
94	LEUCINE
95	L-METHIONINE SULFOXIDE
96	LUMICHROME
97	MALIC ACID
98	MALTOTRIOSE
99	METHYL VANILLATE
100	METHYLMALONATE
101	M-HYDROXYHIPPURIC ACID
102	MYO-INOSITOL
103	N-ACETYLGLUCOSAMINE
104	N-ACETYLGLUTAMATE
105	N-ACETYL-L-GLUTAMINE
106	N-ACETYLMURAMIC ACID
107	N-ACETYLSERINE
108	N-BUTYRYLGLYCINE
109	NEPSILON-ACETYL-L-LYSINE
110	NICOTINATE
111	N-SUBEROYLGLYCINE
112	ORNITHINE
113	OROTATE
114	OROTIDINE
115	PANTOTHENATE
116	P-COUMARIC ACID
117	PHENYLACETYLGLUTAMINE
118	PHENYLALANINE
119	PROLINE
120	PSEUDOURIDINE
121	PSICOSE
122	PTERIN
123	PYRIDOXINE
124	PYROCATECHOL
125	QUINATE
126	QUINOLINATE
127	RIBOSE
128	SACCHAROPINE
129	SERINE
130	SHIKIMATE
131	SINAPIC ACID
132	TAURINE
133	TAUROHYODEOXYCHOLATE
134	THIOCYANATE
135	THREONIC ACID
136	THREONINE
137	THYMINE
138	TRANS-ACONITATE
139	TRIGONELLINE
140	TRYPTOPHAN
141	TYROSINE
142	URACIL 5-CARBOXYLATE
143	UREIDOPROPIONATE
144	UREIDOSUCCINIC ACID
145	URIC ACID
146	URIDINE
147	VALINE
148	VANILLIC ACID
149	XANTHINE

## Sheet: (B)
	Metabolite name	Log2 fold change	t-test
#	D, Drought w/o bacteria ; I, irrigation w/o bacteria	D/I	D vs I
1	1-METHYLGUANINE	-0.209037	0.0272526
5	2,3-DIHYDROXYBENZOATE	0.0114384	0.758939
13	2-KETO-3-DEOXYOCTONATE	-0.200014	0.0379008
17	3,4 DIHYDROXYMANDELATE	0.189299	0.00960795
20	3,4-DIHYDROXYBENZOATE	-0.420814	0.0544484
22	3,5-DIMETHOXYPHENOL	0.0543891	0.0399751
25	3-HYDROXYBUTYRIC ACID	-0.189591	0.0169332
35	4-HYDROXYCYCLOHEXANECARBOXYLIC ACID	-2.23291	0.00883449
42	ADENINE	-0.133752	0.0116746
43	ADENOSINE	-0.0684374	0.0449977
44	ALANINE	-0.271831	0.0338925
50	ARABINOSE	-0.0318428	0.308551
55	ASPARTATE	-0.111708	0.0431031
58	CITRULLINE	-0.435972	0.00484495
61	D-CHIRO-INOSITOL	-0.159999	0.00782496
65	D-SORBITOL	-0.0402763	0.0453046
66	ETHYLMALONATE	0.0922803	0.00911452
69	GAMMA-AMINOBUTYRATE	-0.15591	0.0426946
70	GLUCONATE	-0.14475	0.0217041
74	GLUTAMATE	-0.123439	0.00854821
79	GUANINE	-0.278022	0.00309192
82	HYDROXYPHENYLLACTATE	-0.305623	0.0137426
86	INDOLE-3-LACTIC ACID	-1.56392	0.178849
88	ISOLEUCINE	-0.225315	0.0117401
93	LACTOBIONIC ACID	-1.93661	0.044917
94	LEUCINE	-0.223394	0.0247667
95	L-METHIONINE SULFOXIDE		0.0335458
97	MALIC ACID	-0.02754	0.0371788
107	N-ACETYLSERINE	-0.125455	0.0293852
108	N-BUTYRYLGLYCINE	0.0396283	0.194955
110	NICOTINATE	-0.0287816	0.202839
111	N-SUBEROYLGLYCINE	0.286641	0.0105678
116	P-COUMARIC ACID	-0.213806	0.00115948
120	PSEUDOURIDINE	-4.94204	3.12247e-05
125	QUINATE	-0.250296	0.0144966
127	RIBOSE	-0.18272	0.00229642
135	THREONIC ACID	-0.102812	0.000855845
136	THREONINE	-0.0971709	0.0172431
137	THYMINE	-0.0628465	0.0368492
139	TRIGONELLINE	-0.133067	0.0176765
140	TRYPTOPHAN	-0.230155	0.0242874
141	TYROSINE	-0.318861	0.0169174
145	URIC ACID	-0.145427	0.0210267
149	XANTHINE	-0.312706	0.00987375

## Sheet: (C)
	Metabolite name	Log2 fold change	t-test	Log2 fold change	t-test
#	RIB, re-irrigation with bacteria I, irrigation w/o bacteria; RI, Re-irrigation w/o bacteria	RI/I	RI vs I	RIB/RI	RIB vs RI
4	2-(4-HYDROXYPHENYL)PROPIONIC ACID	0.0501391	0.0408622	-0.0185671	0.39398
16	3-(4-HYDROXY-3-METHOXY-PHENYL)-PROPIONIC ACID	0.132495	0.0334528	-0.0029382	0.943969
42	ADENINE	0.122709	0.0450254	-0.0314489	0.361904
48	ALPHA-SANTONIN	0.131722	0.0392295	0.0127854	0.714505
51	ARABITOL	0.118536	0.0442148	0.00613382	0.886631
56	BETAINE	0.0166324	0.40525	-0.0406494	0.0159222
62	DEOXYCYTIDINE	2.27443	0.00838255	0.0459746	0.59807
79	GUANINE	0.0988431	0.0326069	-0.0203763	0.33279
84	INDOLE-3-ACETATE	1.40001	0.0460925	0.0791054	0.150654
85	INDOLE-3-CARBOXYLIC ACID	0.350832	0.0034003	-0.00947098	0.910623
88	ISOLEUCINE	0.111436	0.043431	0.0260243	0.694735
94	LEUCINE	0.110437	0.04555	0.0437337	0.475875
95	L-METHIONINE SULFOXIDE	2.05396	0.0193545	-0.111726	0.704914
108	N-BUTYRYLGLYCINE	0.0563211	0.0239168	0.00879543	0.579069
119	PROLINE	0.115781	0.0298496	-0.0308391	0.433131
131	SINAPIC ACID	0.144825	0.0156933	-0.0150612	0.61243
140	TRYPTOPHAN	0.138294	0.0402445	0.010549	0.816452
149	XANTHINE	0.177782	0.0151231	0.0125526	0.764633

## Sheet: (D)
	Metabolite name	Log2 fold change	t-test
#	DB, Drought with bacteria; D, Drought w/o bacteria ; IB, irrigation with bacteria I, irrigation w/o bacteria	DB/D	DB vs D
1	1-METHYLGUANINE	0.116526	0.253921
5	2,3-DIHYDROXYBENZOATE	0.115932	0.0126184
13	2-KETO-3-DEOXYOCTONATE	0.178432	0.187226
17	3,4-DIHYDROXYMANDELATE	-0.0400008	0.674713
20	3,4-DIHYDROXYBENZOATE	0.543808	0.0303079
22	3,5-DIMETHOXYPHENOL	-0.064434	0.0479564
25	3-HYDROXYBUTYRIC ACID	0.107284	0.342342
35	4-HYDROXYCYCLOHEXANECARBOXYLIC ACID	1.90472	0.0504927
42	ADENINE	0.0875909	0.0606102
43	ADENOSINE	0.00661989	0.914
44	ALANINE	-0.00298326	0.983101
50	ARABINOSE	0.0843972	0.0324304
55	ASPARTATE	0.104002	0.324969
58	CITRULLINE	0.326448	0.0647563
61	D-CHIRO-INOSITOL	0.229578	0.0398282
65	D-SORBITOL	0.069856	0.268767
66	ETHYLMALONATE	0.0185289	0.762868
69	GAMMA-AMINOBUTYRATE	0.0575465	0.421578
70	GLUCONATE	0.176684	0.225729
74	GLUTAMATE	0.0787739	0.301616
79	GUANINE	0.122831	0.327755
82	HYDROXYPHENYLLACTATE	0.263168	0.0612754
86	INDOLE-3-LACTIC ACID	1.95933	0.0199349
88	ISOLEUCINE	-0.0264661	0.688877
93	LACTOBIONIC ACID	1.63084	0.165232
94	LEUCINE	0.0596675	0.434224
95	L-METHIONINE SULFOXIDE	0.125671	0.946562
97	MALIC ACID	0.0621768	0.309324
107	N-ACETYLSERINE	0.141687	0.0429997
108	N-BUTYRYLGLYCINE	-0.109907	0.0153683
110	NICOTINATE	0.0491047	0.0388361
111	N-SUBEROYLGLYCINE	-0.253273	0.146419
116	P-COUMARIC ACID	0.128029	0.2274
120	PSEUDOURIDINE	3.11301	0.078
125	QUINATE	0.258398	0.0246281
127	RIBOSE	0.227159	0.0266177
135	THREONIC ACID	-0.0141473	0.888873
136	THREONINE	0.0121566	0.808424
137	THYMINE	0.103545	0.00767086
139	TRIGONELLINE	0.134115	0.0414667
140	TRYPTOPHAN	0.121408	0.269787
141	TYROSINE	0.148084	0.268443
145	URIC ACID	0.0661901	0.437859
149	XANTHINE	0.207013	0.100849

## Sheet: (E)
	Metabolite name	Chamical Class	Neutral Elemental Composition
1	1-METHYLGUANINE	purine derivatives	C6H7N5O
5	2,3-DIHYDROXYBENZOATE	hydroxybenzoic acid derivatives	C7H5O4-
13	2-KETO-3-DEOXYOCTONATE	sugar	C8H14O8
17	3,4-DIHYDROXYMANDELATE	catechols	C8H8O5
20	3,4-DIHYDROXYBENZOATE (Protocatechuic acid)	hydroxybenzoic acid derivatives	C7H5O4-
22	3,5-DIMETHOXYPHENOL	Phenolics	C8H10O3
25	3-HYDROXYBUTYRIC ACID	butyric acid derivatives	C4H8O3
35	4-HYDROXYCYCLOHEXANECARBOXYLIC ACID	cyclohexanols acid	C7H12O3
42	ADENINE	purine derivatives	C5H5N5
43	ADENOSINE	purine derivatives	C10H13N5O4
44	ALANINE	amino acid	C3H7NO2
50	ARABINOSE	sugar	C5H10O5
55	ASPARTATE	amino acid	C4H7NO4
58	CITRULLINE	amino acid	C6H13N3O3
61	D-CHIRO-INOSITOL	sugar	C6H12O6
65	D-SORBITOL	sugar alcohol	C6H14O6
66	ETHYLMALONATE	branched fatty acids	C5H8O4
69	GAMMA-AMINOBUTYRATE	amino acid derivatives	C4H9NO2
70	GLUCONATE	carboxylic acid	C6H12O7
74	GLUTAMATE	amino acid	C5H9NO4
79	GUANINE	purine derivatives	C5H5N5O
82	HYDROXYPHENYLLACTATE	lactic acid	C9H10O4
86	INDOLE-3-LACTIC ACID	carboxylic acid	C11H11NO3
88	ISOLEUCINE	amino acid	C6H13NO2
93	LACTOBIONIC ACID	sugar acids	C12H22O12
94	LEUCINE	amino acid	C6H13NO2
95	L-METHIONINE SULFOXIDE	amino acid	C5H11NO3S
97	MALIC ACID	hydroxy acids	C4H6O5
107	N-ACETYLSERINE	n-acyl-l-alpha-amino acid	C5H9NO4
108	N-BUTYRYLGLYCINE	n-acyl-l-alpha-amino acid	C6H11NO3
110	NICOTINATE	pyridinecarboxylic acids	C6H4NO2-
111	N-SUBEROYLGLYCINE	n-acyl-l-alpha-amino acid	C10H17NO5
116	P-COUMARIC ACID (4-Hydroxycinnamic acid)	hydroxycinnamic acids	C9H8O3																																			https://pubs.acs.org/doi/abs/10.1021/np010238g
120	PSEUDOURIDINE	nucleoside and nucleotide analogues	C9H12N2O6
125	QUINATE	shikimate pathway	C7H12O6
127	RIBOSE	sugar acids	C5H10O5
135	THREONIC ACID	sugar acids	C4H8O5
136	THREONINE	amino acid	C4H9NO3
137	THYMINE	pyrimidine derivatives	C5H6N2O2
139	TRIGONELLINE	alkaloids derivatives	C7H7NO2
140	TRYPTOPHAN	amino acid, shikimate pathway	C11H13N2O2
141	TYROSINE	amino acid, shikimate pathway	C9H11NO3
145	URIC ACID	purine derivatives	C5H4N4O3
149	XANTHINE	purine derivatives	C5H4N4O
	*In red, metabolites are marked whose effect on bacterial growth in vitro has been tested

## Sheet: (F)
Metabolite	I.p	B.p	Interaction.p	I/D	DB/D	IB/I	IB/D	DB/I	DB/IB	I.fdr	B.fdr	Interaction.fdr	I/D.fdr	DB/D.fdr	IB/D.fdr	DB/I.fdr	IB/I.fdr	DB/IB.fdr
1-METHYLGUANINE	0.598897	0.834764	0.623611	0.879069	0.955866	0.997276	0.961999	0.998271	0.999994	0.912109	0.932587	0.899208	1	1	0.999998	1	1	0.999999
1-METHYLURIC ACID	0.497026	0.849279	0.755676	0.988688	0.983082	0.999805	0.983123	0.905829	0.900314	0.908122	0.941449	0.908081	1	1	0.999998	1	1	0.999999
1-PHENYL-1,2-PROPANEDIONE	0.0865162	0.723168	0.729428	0.650964	1	0.956768	0.436538	0.691425	0.478314	0.575868	0.928181	0.899208	1	1	0.999998	1	1	0.999999
2-(4-HYDROXYPHENYL)PROPIONIC ACID	0.255143	0.829665	0.305153	0.997051	0.796332	0.937028	0.88073	0.671462	0.424296	0.776286	0.932587	0.899208	1	1	0.999998	1	1	0.999999
2,3-DIHYDROXYBENZOATE	0.410775	0.0157745	0.863421	0.909313	0.0329039	0.203412	0.515342	0.109485	0.986252	0.879224	0.409819	0.966014	1	1	0.999998	1	1	0.999999
2,4,6-TRIHYDROXYBENZOIC ACID	0.810784	0.556361	0.646179	0.999633	0.99981	0.87169	0.917326	0.997978	0.949975	0.953113	0.883995	0.899208	1	1	0.999998	1	1	0.999999
2,6-DIHYDROXYPYRIDINE	0.942744	0.811347	0.201426	0.843226	0.676716	0.874673	0.999997	0.976803	0.720698	0.973002	0.928181	0.899208	1	1	0.999998	1	1	0.999999
2,6-DIMETHOXYBENZOIC ACID	0.941691	0.793023	0.163266	0.811058	0.819472	0.63078	0.983171	0.999858	0.654055	0.973002	0.928181	0.899208	1	1	0.999998	1	1	0.999999
2-AMINOADIPIC ACID	0.392676	0.41495	0.967929	0.906814	0.944598	0.919927	0.628262	0.999938	0.921617	0.879224	0.824138	0.979807	1	1	0.999998	1	1	0.999999
2-HYDROXY-2-(4-HYDROXYPHENYL)ACETIC ACID	0.832451	0.643762	0.917239	0.999818	0.976994	0.993069	0.997618	0.959482	0.996752	0.960004	0.92058	0.971593	1	1	0.999998	1	1	0.999999
2-HYDROXY-5-METHOXYBENZOIC ACID	0.348768	0.263997	0.168257	0.994449	0.290628	0.998247	0.99991	0.363328	0.360434	0.854281	0.795396	0.899208	1	1	0.999998	1	1	0.999999
2-ISOPROPYLMALIC ACID	0.358595	0.434532	0.631477	0.981655	0.800093	0.99498	0.999548	0.579815	0.771467	0.854652	0.826282	0.899208	1	1	0.999998	1	1	0.999999
2-KETO-3-DEOXYOCTONATE	0.973326	0.367897	0.613587	0.978659	0.743201	0.989102	0.912387	0.900614	0.985638	0.988973	0.814323	0.899208	1	1	0.999998	1	1	0.999999
3-(2-HYDROXYPHENYL)PROPANOATE	0.0274871	0.509886	0.186669	0.789692	0.481087	0.963877	0.580206	0.120907	0.0814152	0.517984	0.849786	0.899208	1	1	0.999998	1	1	0.999999
3-(3-METHOXYPHENYL)PROPIONIC ACID	0.74886	0.350018	0.149576	0.892518	0.973189	0.334761	0.727326	0.995997	0.521875	0.940814	0.814323	0.899208	1	1	0.999998	1	1	0.999999
3-(4-HYDROXY-3-METHOXY-PHENYL)-PROPIONIC ACID	0.568248	0.831719	0.653351	0.998689	0.997825	0.963766	0.932666	0.987104	0.88212	0.912109	0.932587	0.899208	1	1	0.999998	1	1	0.999999
3,4 DIHYDROXYMANDELATE	0.109843	0.594989	0.13519	0.142658	0.870507	0.469323	0.915888	0.538716	0.99949	0.575868	0.914876	0.899208	1	1	0.999998	1	1	0.999999
3,4,5-TRIMETHOXYCINNAMIC ACID	0.666833	0.0393034	0.0550819	0.782787	0.999889	0.0350824	0.196978	0.777016	0.256921	0.940814	0.624487	0.899208	1	1	0.999998	1	1	0.999999
3,4-DIHYDROXYBENZALDEHYDE	0.816765	0.132308	0.871228	0.999251	0.0460074	0.599777	0.560652	0.802328	0.98766	0.953113	0.736828	0.966014	1	1	0.999998	1	1	0.999999
3,4-DIHYDROXYBENZOATE	0.920024	0.0890522	0.210569	0.757051	0.167183	0.977015	0.587499	0.54115	0.818112	0.970056	0.736828	0.899208	1	1	0.999998	1	1	0.999999
3,4-DIMETHOXYPHENYLACETIC ACID	0.883222	0.716681	0.448663	0.976678	0.845513	0.992588	0.999588	0.964758	0.904111	0.970056	0.928181	0.899208	1	1	0.999998	1	1	0.999999
3,5-DIMETHOXYPHENOL	0.612325	0.243681	0.108043	0.436667	0.02064	0.98919	0.696959	0.893847	0.791387	0.912109	0.795396	0.899208	1	1	0.999998	1	1	0.999999
3-AMINO-4-HYDROXYBENZOATE	0.741932	0.304981	0.212108	0.943194	0.996919	0.37279	0.693014	0.989062	0.613003	0.940814	0.795396	0.899208	1	1	0.999998	1	1	0.999999
3-DEHYDROSHIKIMATE	0.731114	0.296449	0.644143	0.927567	0.700875	0.96809	0.759716	0.942064	0.999637	0.940814	0.795396	0.899208	1	1	0.999998	1	1	0.999999
3-HYDROXYBUTYRIC ACID	0.461131	0.444921	0.995347	0.929038	0.945587	0.941996	0.703159	1	0.955453	0.879224	0.826282	0.995347	1	1	0.999998	1	1	0.999999
3-HYDROXYMETHYLGLUTARATE	0.538584	0.887521	0.612057	0.84899	0.992548	0.96603	0.991553	0.963407	0.999999	0.911464	0.95455	0.899208	1	1	0.999998	1	1	0.999999
3-METHOXY-4-HYDROXYMANDELATE	0.251847	0.723035	0.194107	1	0.618366	0.902198	0.909073	0.585392	0.312913	0.776286	0.928181	0.899208	1	1	0.999998	1	1	0.999999
3-METHYL-L-HISTIDINE	0.684205	0.00673607	0.925282	0.992859	0.194934	0.135348	0.232112	0.110894	0.999563	0.940814	0.409819	0.972907	1	1	0.999998	1	1	0.999999
3-METHYLXANTHINE	0.0289781	0.257997	0.605651	0.490195	0.638937	0.962013	0.832462	0.083855	0.255379	0.517984	0.795396	0.899208	1	1	0.999998	1	1	0.999999
3-PHENYLLACTIC ACID	0.0286275	0.917297	0.320544	0.652505	0.907834	0.858561	0.303898	0.314432	0.129147	0.517984	0.95455	0.899208	1	1	0.999998	1	1	0.999999
4-AMINOSALICYLIC ACID	NA	NA	NA	NA	NA	NA	NA	NA	NA	NA	NA	NA	NA	NA	NA	NA	NA	NA
4-GUANIDINOBUTYRIC ACID	0.554527	0.440098	0.569234	0.848693	0.999168	0.765429	0.996728	0.807206	0.999857	0.911464	0.826282	0.899208	1	1	0.999998	1	1	0.999999
4-HYDROXY-3,5-DIMETHOXY-BENZOIC ACID	0.773476	0.162338	0.961997	0.989836	0.721458	0.737593	0.599862	0.84878	0.997186	0.940814	0.736828	0.979807	1	1	0.999998	1	1	0.999999
4-HYDROXY-3-METHYLBENZOIC ACID	0.229652	0.452121	0.972956	0.776688	0.95533	0.936514	0.507053	0.982788	0.82381	0.776286	0.828798	0.979807	1	1	0.999998	1	1	0.999999
4-HYDROXYCYCLOHEXANECARBOXYLIC ACID	0.00780181	0.147605	0.0443262	0.00830066	0.0781804	0.973895	0.0376711	0.840128	0.981842	0.371886	0.736828	0.899208	0.663665	1	0.999998	1	1	0.999999
4-NITROPHENOL	0.513233	0.9249	0.060301	0.845736	0.445003	0.553488	0.944587	0.842066	0.240249	0.908122	0.95455	0.899208	1	1	0.999998	1	1	0.999999
4-PYRIDOXATE	0.492384	0.876019	0.494054	0.754291	0.925661	0.981808	0.947595	0.990748	0.999868	0.908122	0.95455	0.899208	1	1	0.999998	1	1	0.999999
5-KETO-D-GLUCONIC ACID	0.281121	0.574874	0.336445	0.995965	0.988421	0.69393	0.60019	0.948143	0.463046	0.820415	0.893554	0.899208	1	1	0.999998	1	1	0.999999
6-AMINOHEXANOIC ACID	0.330109	0.685407	0.429597	0.995988	0.819407	0.993186	0.967558	0.687095	0.601365	0.842956	0.928181	0.899208	1	1	0.999998	1	1	0.999999
6-HYDROXYNICOTINATE	0.298199	0.135963	0.769018	0.90418	0.816596	0.551658	0.267949	0.992317	0.76626	0.820651	0.736828	0.916414	1	1	0.999998	1	1	0.999999
6-OXO-2-PIPERIDINECARBOXYLIC ACID	0.183737	0.00785093	0.858597	0.837112	0.153102	0.20305	0.605886	0.031343	0.776964	0.723176	0.409819	0.966014	1	1	0.999998	1	1	0.999999
ADENINE	0.0230632	0.505456	0.154615	0.0466878	0.432645	0.945729	0.195361	0.681124	0.951516	0.517984	0.849786	0.899208	1	1	0.999998	1	1	0.999999
ADENOSINE	0.0612678	0.786838	0.473448	0.229933	0.986053	0.892256	0.678951	0.446524	0.876125	0.569693	0.928181	0.899208	1	1	0.999998	1	1	0.999999
ALANINE	0.0453181	0.471221	0.542348	0.218449	0.999905	0.77089	0.799778	0.23985	0.792876	0.569693	0.828798	0.899208	1	1	0.999998	1	1	0.999999
ALLANTOIC ACID	NA	NA	NA	NA	NA	NA	NA	NA	NA	NA	NA	NA	NA	NA	NA	NA	NA	NA
ALLANTOIN	0.459804	0.683248	0.11619	0.37016	0.467274	0.826838	0.900274	0.999996	0.87046	0.879224	0.928181	0.899208	1	1	0.999998	1	1	0.999999
ALLOSE	0.990295	0.761388	0.879933	0.999612	0.987645	0.999411	0.996898	0.994732	0.99942	0.990295	0.928181	0.966014	1	1	0.999998	1	1	0.999999
ALPHA-SANTONIN	0.254049	0.0688726	0.111381	0.993034	0.0875168	0.994972	0.964215	0.114067	0.231974	0.776286	0.703485	0.899208	1	1	0.999998	1	1	0.999999
ANTHRANILATE	0.865243	0.768961	0.912004	0.999959	0.991293	0.999027	0.999732	0.985398	0.997504	0.970056	0.928181	0.971593	1	1	0.999998	1	1	0.999999
ARABINOSE	0.552374	0.0150379	0.693693	0.999549	0.170128	0.357858	0.440121	0.124369	0.924174	0.911464	0.409819	0.899208	1	1	0.999998	1	1	0.999999
ARABITOL	0.802992	0.46286	0.726306	0.968532	0.862564	0.990641	0.898937	0.979496	0.999778	0.953113	0.828798	0.899208	1	1	0.999998	1	1	0.999999
ARGININE	0.404579	0.46787	0.303726	0.566155	0.994212	0.591531	0.999981	0.765062	0.992553	0.879224	0.828798	0.899208	1	1	0.999998	1	1	0.999999
ARGININOSUCCINIC ACID	0.897254	0.110538	0.94966	1	0.622961	0.649421	0.675603	0.594495	0.999773	0.970056	0.736828	0.979807	1	1	0.999998	1	1	0.999999
ASPARAGINE	0.761721	0.110607	0.620288	0.923669	0.43966	0.819562	0.518887	0.741778	0.9991	0.940814	0.736828	0.899208	1	1	0.999998	1	1	0.999999
ASPARTATE	0.345052	0.202664	0.915674	0.827307	0.750971	0.812439	0.395524	0.99503	0.933357	0.854281	0.762656	0.971593	1	1	0.999998	1	1	0.999999
BETAINE	0.109272	0.117661	0.141091	0.128554	0.149436	0.999371	0.156259	0.998825	0.999994	0.575868	0.736828	0.899208	1	1	0.999998	1	1	0.999999
CITRAMALATE	0.0960193	0.328395	0.687144	0.725932	0.753716	0.969925	0.953545	0.225444	0.497421	0.575868	0.79594	0.899208	1	1	0.999998	1	1	0.999999
CITRULLINE	0.00449448	0.120624	0.09414	0.00928203	0.0113955	0.999943	0.0209964	0.754432	0.825156	0.321355	0.736828	0.899208	0.663665	1	0.999998	1	1	0.999999
CREATINE	NA	NA	NA	NA	NA	NA	NA	NA	NA	NA	NA	NA	NA	NA	NA	NA	NA	NA
CYTIDINE	0.0666051	0.156145	0.0775081	0.996222	0.119622	0.995037	0.973266	0.0702625	0.0725785	0.569693	0.736828	0.899208	1	1	0.999998	1	1	0.999999
D-CHIRO-INOSITOL	0.654159	0.0171952	0.189763	0.558134	0.0534311	0.764104	0.184603	0.353222	0.907497	0.935447	0.409819	0.899208	1	1	0.999998	1	1	0.999999
DEOXYCYTIDINE	0.625932	0.934524	0.608052	0.887121	0.97141	0.989939	0.983482	0.995855	0.999859	0.91335	0.95455	0.899208	1	1	0.999998	1	1	0.999999
DIHYDROOROTATE	0.87279	0.754567	0.311684	0.846246	0.765311	0.958634	0.993696	0.994376	0.903038	0.970056	0.928181	0.899208	1	1	0.999998	1	1	0.999999
D-SEDOHEPTULOSE	0.400338	0.699246	0.222746	0.477999	0.916179	0.656408	0.996776	0.891212	0.975019	0.879224	0.928181	0.899208	1	1	0.999998	1	1	0.999999
D-SORBITOL	0.71926	0.339322	0.222006	0.935221	0.406642	0.998099	0.983161	0.685043	0.649805	0.940814	0.808717	0.899208	1	1	0.999998	1	1	0.999999
ETHYLMALONATE	0.165876	0.163022	0.528236	0.475573	0.944587	0.459027	0.999408	0.246997	0.975381	0.677724	0.736828	0.899208	1	1	0.999998	1	1	0.999999
FERULIC ACID	0.45052	0.759564	0.678233	0.987845	0.999738	0.95348	0.857738	0.97825	0.837593	0.879224	0.928181	0.899208	1	1	0.999998	1	1	0.999999
FRUCTOSE	0.0677258	0.371656	0.442011	0.779488	0.631638	0.999415	0.877417	0.183858	0.288782	0.569693	0.814323	0.899208	1	1	0.999998	1	1	0.999999
GAMMA-AMINOBUTYRATE	0.724251	0.317781	0.192842	0.93691	0.993133	0.362457	0.692733	0.993083	0.577152	0.940814	0.795396	0.899208	1	1	0.999998	1	1	0.999999
GLUCONATE	0.764178	0.234623	0.437347	0.98716	0.498994	0.986051	0.922879	0.647529	0.867381	0.940814	0.795396	0.899208	1	1	0.999998	1	1	0.999999
GLUCOSAMINATE	0.600626	0.930107	0.254111	0.647869	0.796582	0.871862	0.986415	0.998617	0.944942	0.912109	0.95455	0.899208	1	1	0.999998	1	1	0.999999
GLUCOSE 6-PHOSPHATE	0.865712	0.30128	0.717314	0.976387	0.747182	0.954061	0.823244	0.908265	0.999036	0.970056	0.795396	0.899208	1	1	0.999998	1	1	0.999999
GLUCURONATE	0.352465	0.641236	0.379378	0.998606	0.987888	0.767749	0.709836	0.962098	0.561816	0.854281	0.92058	0.899208	1	1	0.999998	1	1	0.999999
GLUTAMATE	0.328442	0.537994	0.697567	0.726117	0.886603	0.997853	0.685258	0.995517	0.981492	0.842956	0.874241	0.899208	1	1	0.999998	1	1	0.999999
GLUTAMINE	0.238474	0.41022	0.79774	0.677331	0.864339	0.972481	0.49905	0.993973	0.922641	0.776286	0.824138	0.942783	1	1	0.999998	1	1	0.999999
GLYCERATE	0.443584	0.379411	0.892963	0.962983	0.884935	0.942978	0.999554	0.634519	0.933922	0.879224	0.814323	0.967376	1	1	0.999998	1	1	0.999999
GLYCEROL 3-PHOSPHATE	0.721802	0.311599	0.661655	0.930026	0.724925	0.969582	0.767531	0.951789	0.999855	0.940814	0.795396	0.899208	1	1	0.999998	1	1	0.999999
GLYOXYLATE	0.301819	0.20158	0.265078	0.402691	0.329201	0.998483	0.404265	0.988308	0.998851	0.820651	0.762656	0.899208	1	1	0.999998	1	1	0.999999
GUANINE	0.00366458	0.180957	0.559226	0.150159	0.947155	0.503827	0.017846	0.427115	0.0665537	0.321355	0.739338	0.899208	1	1	0.999998	1	1	0.999999
GUANOSINE	0.38668	0.322608	0.0684537	0.918996	0.190311	0.922717	0.999992	0.40212	0.21722	0.879224	0.795396	0.899208	1	1	0.999998	1	1	0.999999
GULONIC ACID GAMMA-LACTONE	0.945785	0.170037	0.721355	0.986165	0.59977	0.859372	0.71678	0.755237	0.997498	0.973002	0.736828	0.899208	1	1	0.999998	1	1	0.999999
HYDROXYPHENYLLACTATE	0.440373	0.151289	0.365457	0.600481	0.347596	0.970072	0.427319	0.928459	0.99875	0.879224	0.736828	0.899208	1	1	0.999998	1	1	0.999999
HYPOXANTHINE	0.0895092	0.312787	0.380647	0.231113	0.532703	0.999246	0.258363	0.969057	0.951954	0.575868	0.795396	0.899208	1	1	0.999998	1	1	0.999999
INDOLE-3-ACETATE	0.143392	0.0608641	0.172072	0.175512	0.11203	0.965367	0.117653	0.958944	0.999993	0.640343	0.703485	0.899208	1	1	0.999998	1	1	0.999999
INDOLE-3-CARBOXYLIC ACID	0.454805	0.277945	0.658088	0.797636	0.691479	0.958252	0.574044	0.991006	0.997514	0.879224	0.795396	0.899208	1	1	0.999998	1	1	0.999999
INDOLE-3-LACTIC ACID	0.757178	0.0868034	0.397305	0.979053	0.269819	0.889084	0.728414	0.404401	0.847449	0.940814	0.736828	0.899208	1	1	0.999998	1	1	0.999999
INOSINE	0.217442	0.209655	0.304697	0.994868	0.37002	0.996693	0.999998	0.243626	0.40505	0.776286	0.768736	0.899208	1	1	0.999998	1	1	0.999999
ISOLEUCINE	0.0663754	0.16867	0.369759	0.212554	0.986351	0.365757	0.995252	0.147876	0.947327	0.569693	0.736828	0.899208	1	1	0.999998	1	1	0.999999
ISOMALTOTRIOSE	0.744228	0.629819	0.482873	0.99537	0.825185	0.998877	0.999865	0.904878	0.876059	0.940814	0.92058	0.899208	1	1	0.999998	1	1	0.999999
ISONICOTINIC ACID	0.525072	0.520911	0.5543	0.999823	0.809245	0.99994	0.999998	0.751888	0.823516	0.911464	0.85621	0.899208	1	1	0.999998	1	1	0.999999
ISOVALERALDEHYDE	0.301674	0.603965	0.332541	0.99789	0.984173	0.708731	0.638184	0.949017	0.477768	0.820651	0.917783	0.899208	1	1	0.999998	1	1	0.999999
KYNURENATE	0.134863	0.287575	0.615821	0.803191	0.97829	0.665802	0.260509	0.971144	0.490601	0.640343	0.795396	0.899208	1	1	0.999998	1	1	0.999999
LACTOBIONIC ACID	0.922571	0.662289	0.337808	0.881817	0.739244	0.982666	0.989136	0.981517	0.904996	0.970056	0.928181	0.899208	1	1	0.999998	1	1	0.999999
LEUCINE	0.254678	0.642827	0.249084	0.376036	0.948896	0.652439	0.981692	0.750243	0.998612	0.776286	0.92058	0.899208	1	1	0.999998	1	1	0.999999
L-METHIONINE SULFOXIDE	0.0506014	0.909644	0.858062	0.341055	0.996524	0.99997	0.448167	0.513694	0.608806	0.569693	0.95455	0.966014	1	1	0.999998	1	1	0.999999
LUMICHROME	0.508277	0.686931	0.523553	0.777239	0.872898	0.998564	0.891779	0.999516	0.999969	0.908122	0.928181	0.899208	1	1	0.999998	1	1	0.999999
MALIC ACID	0.546747	0.235604	0.435226	0.99967	0.498518	0.986589	0.976182	0.517793	0.766246	0.911464	0.795396	0.899208	1	1	0.999998	1	1	0.999999
MALTOTRIOSE	0.81981	0.038798	0.867495	0.996627	0.490938	0.334261	0.464632	0.35733	0.999967	0.953113	0.624487	0.966014	1	1	0.999998	1	1	0.999999
METHYL VANILLATE	0.693465	0.914011	0.43667	0.843682	0.957889	0.919674	0.999145	0.994219	0.984817	0.940814	0.95455	0.899208	1	1	0.999998	1	1	0.999999
METHYLMALONATE	0.27692	0.745509	0.222	0.999998	0.667246	0.915577	0.918949	0.631717	0.361876	0.820415	0.928181	0.899208	1	1	0.999998	1	1	0.999999
M-HYDROXYHIPPURIC ACID	0.91299	0.178971	0.88495	0.999142	0.819332	0.68446	0.775309	0.735279	0.999802	0.970056	0.739338	0.966014	1	1	0.999998	1	1	0.999999
MYO-INOSITOL	0.885842	0.113274	0.378651	0.871732	0.302594	0.935685	0.609169	0.648008	0.946474	0.970056	0.736828	0.899208	1	1	0.999998	1	1	0.999999
N-ACETYLGLUCOSAMINE	0.918179	0.779093	0.602287	0.993774	0.997629	0.938065	0.988097	0.999957	0.962238	0.970056	0.928181	0.899208	1	1	0.999998	1	1	0.999999
N-ACETYLGLUTAMATE	0.222012	0.222109	0.55463	0.567136	0.969053	0.555039	0.999645	0.35754	0.986918	0.776286	0.794039	0.899208	1	1	0.999998	1	1	0.999999
N-ACETYL-L-GLUTAMINE	0.81977	0.169773	0.664981	0.998457	0.565979	0.882329	0.829724	0.624631	0.969774	0.953113	0.736828	0.899208	1	1	0.999998	1	1	0.999999
N-ACETYLMURAMIC ACID	0.551276	0.442768	0.684285	0.996087	0.994418	0.827175	0.739678	0.999949	0.881892	0.911464	0.826282	0.899208	1	1	0.999998	1	1	0.999999
N-ACETYLSERINE	0.97593	0.200882	0.187699	0.769869	0.0260403	1	0.815441	0.700286	0.757547	0.988973	0.762656	0.899208	1	1	0.999998	1	1	0.999999
N-BUTYRYLGLYCINE	0.684056	0.010425	0.257172	0.94478	0.040413	0.581664	0.338327	0.105353	0.707192	0.940814	0.409819	0.899208	1	1	0.999998	1	1	0.999999
NEPSILON-ACETYL-L-LYSINE	0.982057	0.574688	0.722694	0.992654	0.91097	0.998398	0.977191	0.972606	0.994733	0.988973	0.893554	0.899208	1	1	0.999998	1	1	0.999999
NICOTINATE	0.647751	0.40737	0.300666	0.981676	0.539471	0.999196	0.996473	0.713688	0.699408	0.935447	0.824138	0.899208	1	1	0.999998	1	1	0.999999
N-SUBEROYLGLYCINE	0.112757	0.134306	0.68204	0.717657	0.854937	0.500924	0.134319	0.998263	0.485045	0.575868	0.736828	0.899208	1	1	0.999998	1	1	0.999999
ORNITHINE	0.0435174	0.785836	0.957448	0.436969	0.995471	0.998425	0.612868	0.362731	0.521366	0.569693	0.928181	0.979807	1	1	0.999998	1	1	0.999999
OROTATE	0.453478	0.712464	0.69563	0.83917	0.999993	0.945877	0.995903	0.874777	0.997607	0.879224	0.928181	0.899208	1	1	0.999998	1	1	0.999999
OROTIDINE	0.514391	0.760115	0.722228	0.993538	0.963101	0.999993	0.993485	0.879564	0.895486	0.908122	0.928181	0.899208	1	1	0.999998	1	1	0.999999
PANTOTHENATE	0.584022	0.360631	0.28132	0.645778	0.484508	0.999674	0.7645	0.976571	0.967073	0.912109	0.814323	0.899208	1	1	0.999998	1	1	0.999999
P-COUMARIC ACID	0.304157	0.426967	0.870119	0.782395	0.00900818	0.963871	0.572808	0.998106	0.93389	0.820651	0.826282	0.966014	1	1	0.999998	1	1	0.999999
PHENYLACETYLGLUTAMINE	NA	NA	NA	NA	NA	NA	NA	NA	NA	NA	NA	NA	NA	NA	NA	NA	NA	NA
PHENYLALANINE	0.0847145	0.960068	0.874116	0.459561	0.999802	0.99878	0.627456	0.56105	0.709008	0.575868	0.973686	0.966014	1	1	0.999998	1	1	0.999999
PROLINE	0.724867	0.551495	0.0874865	0.471675	0.338748	0.840108	0.947688	0.974584	0.67291	0.940814	0.883995	0.899208	1	1	0.999998	1	1	0.999999
PSEUDOURIDINE	0.0118009	0.478028	0.604322	0.0931259	0.812119	0.998549	0.110391	0.481248	0.472298	0.421883	0.828798	0.899208	1	1	0.999998	1	1	0.999999
PSICOSE	0.451087	0.279757	0.414487	0.999811	0.998083	0.524085	0.512941	0.999566	0.652094	0.879224	0.795396	0.899208	1	1	0.999998	1	1	0.999999
PTERIN	0.589034	0.80573	0.202599	0.967348	0.675259	0.877978	0.989888	0.875212	0.539496	0.912109	0.928181	0.899208	1	1	0.999998	1	1	0.999999
PYRIDOXINE	0.106174	0.898265	0.290022	0.931905	0.895416	0.82784	0.541882	0.585009	0.248285	0.575868	0.95455	0.899208	1	1	0.999998	1	1	0.999999
PYROCATECHOL	0.894995	0.609716	0.372001	0.888307	0.737998	0.9934	0.978201	0.978948	0.931559	0.970056	0.917783	0.899208	1	1	0.999998	1	1	0.999999
QUINATE	0.488305	0.0425077	0.245385	0.519817	0.0134893	0.903481	0.2634	0.688134	0.978324	0.908122	0.6826	0.899208	1	1	0.999998	1	1	0.999999
QUINOLINATE	0.149386	0.872425	0.54129	0.879051	0.941296	0.988657	0.766709	0.588141	0.485441	0.640343	0.95455	0.899208	1	1	0.999998	1	1	0.999999
RIBOSE	0.776336	0.0413329	0.356456	0.799541	0.18127	0.822004	0.37957	0.527518	0.963923	0.940814	0.6826	0.899208	1	1	0.999998	1	1	0.999999
SACCHAROPINE	0.610766	0.909709	0.7216	0.919234	0.985741	0.998215	0.975814	0.994908	0.999895	0.912109	0.95455	0.899208	1	1	0.999998	1	1	0.999999
SERINE	0.187115	0.268086	0.156354	0.211072	0.280237	0.996771	0.377169	0.999999	0.996966	0.723176	0.795396	0.899208	1	1	0.999998	1	1	0.999999
SHIKIMATE	0.728584	0.481051	0.671638	0.93828	0.847589	0.996027	0.883211	0.989664	0.999825	0.940814	0.828798	0.899208	1	1	0.999998	1	1	0.999999
SINAPIC ACID	NA	NA	NA	NA	NA	NA	NA	NA	NA	NA	NA	NA	NA	NA	NA	NA	NA	NA
TAURINE	0.145121	0.0655037	0.934812	0.664214	0.566316	0.467538	0.978666	0.109684	0.816388	0.640343	0.703485	0.975753	1	1	0.999998	1	1	0.999999
TAUROHYODEOXYCHOLATE	NA	NA	NA	NA	NA	NA	NA	NA	NA	NA	NA	NA	NA	NA	NA	NA	NA	NA
THIOCYANATE	0.870337	0.413624	0.461782	0.986343	0.999978	0.677668	0.860908	0.983927	0.89309	0.970056	0.824138	0.899208	1	1	0.999998	1	1	0.999999
THREONIC ACID	0.152249	0.981231	0.673347	0.823044	0.987506	0.99194	0.723558	0.665861	0.573308	0.640343	0.988141	0.899208	1	1	0.999998	1	1	0.999999
THREONINE	0.0382533	0.369205	0.264252	0.110469	0.997303	0.477674	0.856651	0.199713	0.940027	0.547022	0.814323	0.899208	1	1	0.999998	1	1	0.999999
THYMINE	0.602087	0.149575	0.125142	0.893854	0.161642	0.999988	0.928865	0.382182	0.442275	0.912109	0.736828	0.899208	1	1	0.999998	1	1	0.999999
TRANS-ACONITATE	0.380148	0.0343417	0.365734	1	0.145619	0.734717	0.756367	0.12496	0.619534	0.879224	0.624487	0.899208	1	1	0.999998	1	1	0.999999
TRIGONELLINE	0.601229	0.265584	0.628373	0.900434	0.969432	0.650395	0.955103	0.6904	0.999909	0.912109	0.795396	0.899208	1	1	0.999998	1	1	0.999999
TRYPTOPHAN	0.085091	0.381536	0.38801	0.228533	0.59711	0.999986	0.292073	0.94001	0.945388	0.575868	0.814323	0.899208	1	1	0.999998	1	1	0.999999
TYROSINE	0.0337675	0.51106	0.248739	0.0877613	0.558245	0.985082	0.234361	0.733281	0.922014	0.536529	0.849786	0.899208	1	1	0.999998	1	1	0.999999
URACIL 5-CARBOXYLATE	0.202662	0.683898	0.749801	0.631392	0.999941	0.951867	0.934816	0.642584	0.928327	0.762649	0.928181	0.908081	1	1	0.999998	1	1	0.999999
UREIDOPROPIONATE	0.326091	0.630107	0.285569	0.999986	0.672255	0.975293	0.972763	0.627411	0.469214	0.842956	0.92058	0.899208	1	1	0.999998	1	1	0.999999
UREIDOSUCCINIC ACID	0.430717	0.396521	0.628356	0.993336	0.772856	0.991476	0.99998	0.608884	0.817102	0.879224	0.824138	0.899208	1	1	0.999998	1	1	0.999999
URIC ACID	0.084343	0.769069	0.530931	0.307094	0.993939	0.910315	0.752698	0.499541	0.893466	0.575868	0.928181	0.899208	1	1	0.999998	1	1	0.999999
URIDINE	0.246163	0.798074	0.87377	0.852542	0.990508	0.999838	0.913571	0.717509	0.805331	0.776286	0.928181	0.966014	1	1	0.999998	1	1	0.999999
VALINE	0.143289	0.989557	0.740336	0.522898	0.994105	0.995832	0.729043	0.727393	0.876275	0.640343	0.989557	0.904855	1	1	0.999998	1	1	0.999999
VANILLIC ACID	0.622571	0.810336	0.588455	0.99999	0.995577	0.942511	0.940817	0.993113	0.873699	0.91335	0.928181	0.899208	1	1	0.999998	1	1	0.999999
XANTHINE	0.102791	0.261045	0.401845	0.261525	0.500178	0.99471	0.243451	0.988955	0.955969	0.575868	0.795396	0.899208	1	1	0.999998	1	1	0.999999

## Sheet: (G)
Metabolite	I.p	B.p	Interaction.p	I/D	DB/D	IB/I	IB/D	DB/I	DB/IB	I.fdr	B.fdr	Interaction.fdr	I/D.fdr	DB/D.fdr	IB/D.fdr	DB/I.fdr	IB/I.fdr	DB/IB.fdr
1-METHYLGUANINE	0.309172	0.303925	0.434779	0.572619	0.997768	1	0.465077	0.567641	0.998055	0.576196	0.989317	0.997442	1	1	1	1	1	1
1-METHYLURIC ACID	0.696224	0.628025	0.837942	0.999119	0.959407	0.999884	0.921817	0.997009	0.97324	0.82905	0.989317	0.997442	1	1	1	1	1	1
1-PHENYL-1,2-PROPANEDIONE	0.13915	0.919691	0.997442	0.7013	0.999873	0.657113	0.741571	0.999846	0.698609	0.370238	0.989317	0.997442	1	1	1	1	1	1
2-(4-HYDROXYPHENYL)PROPIONIC ACID	0.245099	0.50469	0.133221	0.238447	0.922368	0.982701	0.557154	0.407909	0.993642	0.526658	0.989317	0.997442	1	1	1	1	1	1
2,3-DIHYDROXYBENZOATE	0.088608	0.202617	0.7496	0.459079	0.89482	0.986745	0.158169	0.657751	0.730253	0.314347	0.989317	0.997442	1	1	1	1	1	1
2,4,6-TRIHYDROXYBENZOIC ACID	0.22867	0.379638	0.235704	0.999999	0.995616	0.448442	0.994802	0.456109	0.329049	0.511627	0.989317	0.997442	1	1	1	1	1	1
2,6-DIHYDROXYPYRIDINE	0.988726	0.11086	0.582496	0.976888	0.860608	0.652264	0.640099	0.414612	0.980046	0.997616	0.989317	0.997442	1	1	1	1	1	1
2,6-DIMETHOXYBENZOIC ACID	0.0693884	0.867079	0.832604	0.451331	0.992794	0.469225	0.611581	0.999988	0.630632	0.272257	0.989317	0.997442	1	1	1	1	1	1
2-AMINOADIPIC ACID	0.550529	0.7843	0.107428	0.870261	0.753539	0.922643	0.995385	0.520876	0.389822	0.771117	0.989317	0.997442	1	1	1	1	1	1
2-HYDROXY-2-(4-HYDROXYPHENYL)ACETIC ACID	0.800056	0.86044	0.511072	0.912681	0.931148	0.989608	0.999936	0.985194	0.991092	0.889614	0.989317	0.997442	1	1	1	1	1	1
2-HYDROXY-5-METHOXYBENZOIC ACID	0.376542	0.856969	0.702228	0.982855	0.998871	0.867592	0.955648	0.977198	0.797801	0.596859	0.989317	0.997442	1	1	1	1	1	1
2-ISOPROPYLMALIC ACID	0.151537	0.861606	0.770149	0.832442	0.986735	0.78953	0.646395	0.999775	0.595351	0.389294	0.989317	0.997442	1	1	1	1	1	1
2-KETO-3-DEOXYOCTONATE	0.666019	0.236209	0.203094	0.924239	0.305154	0.944439	0.649968	0.999888	0.609587	0.82014	0.989317	0.997442	1	1	1	1	1	1
3-(2-HYDROXYPHENYL)PROPANOATE	0.00583071	0.56251	0.598971	0.300613	0.856184	0.318259	0.0747557	0.999979	0.080614	0.0965306	0.989317	0.997442	1	1	1	1	1	1
3-(3-METHOXYPHENYL)PROPIONIC ACID	0.0594244	0.698962	0.668436	0.690143	0.935506	0.672384	0.354316	0.99999	0.339599	0.253683	0.989317	0.997442	1	1	1	1	1	1
3-(4-HYDROXY-3-METHOXY-PHENYL)-PROPIONIC ACID	0.333072	0.203296	0.460772	0.613846	0.978013	0.995648	0.384469	0.47776	0.998205	0.576196	0.989317	0.997442	1	1	1	1	1	1
3,4 DIHYDROXYMANDELATE	0.0220391	0.565278	0.168909	0.877218	0.932152	0.166223	0.548288	0.500447	0.0536111	0.144103	0.989317	0.997442	1	1	1	1	1	1
3,4,5-TRIMETHOXYCINNAMIC ACID	0.0566776	0.368255	0.459189	0.806686	0.999403	0.193226	0.862875	0.643157	0.234484	0.253683	0.989317	0.997442	1	1	1	1	1	1
3,4-DIHYDROXYBENZALDEHYDE	0.0490107	0.0411419	0.307614	0.151286	0.13551	0.0312011	0.999914	0.852131	0.879045	0.251814	0.989317	0.997442	1	1	1	1	1	1
3,4-DIHYDROXYBENZOATE	0.00282625	0.839934	0.827237	0.0802428	0.999999	0.14117	0.082086	0.990225	0.144157	0.0701851	0.989317	0.997442	1	1	1	1	1	1
3,4-DIMETHOXYPHENYLACETIC ACID	0.013004	0.734134	0.958635	0.263365	0.992039	0.357488	0.1655	0.996785	0.234105	0.1384	0.989317	0.997442	1	1	1	1	1	1
3,5-DIMETHOXYPHENOL	0.0761704	0.12142	0.544812	0.321757	0.892668	0.997907	0.0965425	0.412084	0.811681	0.29101	0.989317	0.997442	1	1	1	1	1	1
3-AMINO-4-HYDROXYBENZOATE	0.782857	0.862859	0.138696	0.808526	0.625306	0.999851	0.988186	0.769482	0.580719	0.883679	0.989317	0.997442	1	1	1	1	1	1
3-DEHYDROSHIKIMATE	0.0175914	0.867982	0.747966	0.401384	0.999489	0.240276	0.34445	0.984918	0.200215	0.144103	0.989317	0.997442	1	1	1	1	1	1
3-HYDROXYBUTYRIC ACID	0.247423	0.356717	0.826536	0.901411	0.955723	0.450578	0.998017	0.842398	0.751409	0.526658	0.989317	0.997442	1	1	1	1	1	1
3-HYDROXYMETHYLGLUTARATE	0.534458	0.540287	0.529867	1	0.999999	0.811295	1	0.808705	0.805416	0.771117	0.989317	0.997442	1	1	1	1	1	1
3-METHOXY-4-HYDROXYMANDELATE	0.869216	0.426988	0.970787	0.999714	0.946241	0.899205	0.967786	0.930986	0.998894	0.915074	0.989317	0.997442	1	1	1	1	1	1
3-METHYL-L-HISTIDINE	0.119495	0.503251	0.415918	0.941947	0.711469	0.907853	0.384113	0.999566	0.33145	0.349114	0.989317	0.997442	1	1	1	1	1	1
3-METHYLXANTHINE	0.224779	0.258411	0.497412	0.528895	0.986788	0.999906	0.345599	0.566707	0.978204	0.511627	0.989317	0.997442	1	1	1	1	1	1
3-PHENYLLACTIC ACID	0.543937	0.896693	0.621015	0.999799	0.993487	0.950878	0.985637	0.969234	0.857367	0.771117	0.989317	0.997442	1	1	1	1	1	1
4-AMINOSALICYLIC ACID	0.258811	0.938317	0.277656	0.395221	0.882387	0.868543	0.8165	0.832639	0.999987	0.543139	0.989317	0.997442	1	1	1	1	1	1
4-GUANIDINOBUTYRIC ACID	0.82607	0.941009	0.150188	0.804615	0.687092	0.999578	0.996595	0.74829	0.624553	0.898426	0.989317	0.997442	1	1	1	1	1	1
4-HYDROXY-3,5-DIMETHOXY-BENZOIC ACID	0.314157	0.623449	0.130693	0.282789	0.870529	0.981149	0.703746	0.474747	0.980144	0.576196	0.989317	0.997442	1	1	1	1	1	1
4-HYDROXY-3-METHYLBENZOIC ACID	0.876822	0.376852	0.633683	0.968228	0.761517	0.875543	0.951255	0.990614	0.995502	0.915074	0.989317	0.997442	1	1	1	1	1	1
4-HYDROXYCYCLOHEXANECARBOXYLIC ACID	0.692192	0.860984	0.687138	0.938996	0.975366	0.976196	0.998531	0.99839	1	0.82905	0.989317	0.997442	1	1	1	1	1	1
4-NITROPHENOL	0.0791583	0.864406	0.959505	0.59056	0.998528	0.642467	0.495972	0.999764	0.546805	0.294865	0.989317	0.997442	1	1	1	1	1	1
4-PYRIDOXATE	0.688437	0.702128	0.86706	0.998262	0.978642	0.999999	0.942129	0.998642	0.976506	0.82905	0.989317	0.997442	1	1	1	1	1	1
5-KETO-D-GLUCONIC ACID	0.835235	0.66316	0.296724	0.801504	0.969827	0.998388	0.966536	0.711015	0.92814	0.901812	0.989317	0.997442	1	1	1	1	1	1
6-AMINOHEXANOIC ACID	0.280113	0.217117	0.587242	0.978549	0.9555	0.356572	0.999419	0.578745	0.648874	0.576196	0.989317	0.997442	1	1	1	1	1	1
6-HYDROXYNICOTINATE	0.293619	0.0703251	0.634765	0.691386	0.745061	0.934165	0.182573	0.353153	0.974132	0.576196	0.989317	0.997442	1	1	1	1	1	1
6-OXO-2-PIPERIDINECARBOXYLIC ACID	0.195729	0.0328606	0.210695	0.275795	0.0845292	0.0794136	0.905518	0.8933	0.999988	0.478093	0.989317	0.997442	1	1	1	1	1	1
ADENINE	0.105882	0.496592	0.597386	0.413388	0.999505	0.892813	0.356074	0.82054	0.845287	0.342516	0.989317	0.997442	1	1	1	1	1	1
ADENOSINE	0.351365	0.41293	0.546499	0.68859	0.73701	0.594019	0.999784	0.99856	0.994917	0.578747	0.989317	0.997442	1	1	1	1	1	1
ALANINE	0.20316	0.817106	0.614357	0.940318	0.997232	0.695935	0.869322	0.951368	0.578159	0.48824	0.989317	0.997442	1	1	1	1	1	1
ALLANTOIC ACID	0.175133	0.879042	0.879042	0.691814	1	0.812568	0.691814	0.99622	0.812568	0.434913	0.989317	0.997442	1	1	1	1	1	1
ALLANTOIN	0.0694347	0.301343	0.274284	0.171339	0.999967	0.92886	0.185007	0.430811	0.942214	0.272257	0.989317	0.997442	1	1	1	1	1	1
ALLOSE	0.686319	0.807541	0.248338	0.675516	0.908519	0.999434	0.965982	0.742498	0.945183	0.82905	0.989317	0.997442	1	1	1	1	1	1
ALPHA-SANTONIN	0.0192313	0.291605	0.203317	0.819899	0.998374	0.0795807	0.731607	0.351699	0.057459	0.144103	0.989317	0.997442	1	1	1	1	1	1
ANTHRANILATE	0.869858	0.387234	0.855266	0.999999	0.873169	0.956305	0.87879	0.959427	0.994467	0.915074	0.989317	0.997442	1	1	1	1	1	1
ARABINOSE	0.753011	0.573373	0.944994	0.99799	0.984159	0.921027	0.997885	0.96803	0.992502	0.867007	0.989317	0.997442	1	1	1	1	1	1
ARABITOL	0.0439512	0.366516	0.921242	0.405727	0.936179	0.821584	0.164809	0.886294	0.484806	0.233883	0.989317	0.997442	1	1	1	1	1	1
ARGININE	0.351034	0.293955	0.327394	0.999984	0.999947	0.491942	0.999756	0.471913	0.522594	0.578747	0.989317	0.997442	1	1	1	1	1	1
ARGININOSUCCINIC ACID	0.136974	0.57105	0.128559	0.999994	0.890457	0.454377	0.900352	0.44009	0.152839	0.370238	0.989317	0.997442	1	1	1	1	1	1
ASPARAGINE	0.115368	0.474883	0.598198	0.860228	0.999064	0.360178	0.914661	0.808194	0.432161	0.349114	0.989317	0.997442	1	1	1	1	1	1
ASPARTATE	0.124153	0.438409	0.734158	0.809315	0.852398	0.938153	0.352637	0.988783	0.526531	0.355747	0.989317	0.997442	1	1	1	1	1	1
BETAINE	0.361231	0.455168	0.384857	0.580152	0.653875	0.634323	0.999325	0.999732	0.999987	0.578747	0.989317	0.997442	1	1	1	1	1	1
CITRAMALATE	0.0268711	0.909484	0.243001	0.835556	0.78815	0.396915	0.31589	0.867303	0.0837951	0.166825	0.989317	0.997442	1	1	1	1	1	1
CITRULLINE	0.792923	0.919812	0.230154	0.715033	0.852165	0.999421	0.993626	0.780044	0.90081	0.888313	0.989317	0.997442	1	1	1	1	1	1
CREATINE	0.997616	0.444949	0.512904	0.965021	0.99981	0.944601	0.945771	0.738686	0.964115	0.997616	0.989317	0.997442	1	1	1	1	1	1
CYTIDINE	0.00862511	0.351366	0.627776	0.107952	0.987612	0.523151	0.0570925	0.738204	0.344434	0.116831	0.989317	0.997442	1	1	1	0.945198	1	1
D-CHIRO-INOSITOL	0.927463	0.974012	0.535872	0.955599	0.965057	0.999743	0.999973	0.974037	0.98075	0.953048	0.989317	0.997442	1	1	1	1	1	1
DEOXYCYTIDINE	2.53703e-05	0.176665	0.392946	0.00126069	0.981794	0.0446221	0.000538819	0.396915	0.020252	0.00378018	0.989317	0.997442	0.187842	1	1	0.0802841	1	1
DIHYDROOROTATE	0.568029	0.90991	0.379978	0.72541	0.944423	0.987283	0.960076	0.889623	0.995886	0.771117	0.989317	0.997442	1	1	1	1	1	1
D-SEDOHEPTULOSE	0.0215877	0.59163	0.878008	0.27103	0.992454	0.527547	0.172419	0.959178	0.373673	0.144103	0.989317	0.997442	1	1	1	1	1	1
D-SORBITOL	0.0612926	0.950159	0.657262	0.339638	0.983128	0.486432	0.539123	0.992603	0.703242	0.253683	0.989317	0.997442	1	1	1	1	1	1
ETHYLMALONATE	0.590132	0.933342	0.653155	0.9999	0.980422	0.987537	0.969447	0.993445	0.892073	0.771117	0.989317	0.997442	1	1	1	1	1	1
FERULIC ACID	0.878225	0.269262	0.795502	0.999837	0.925201	0.798082	0.89827	0.757132	0.990746	0.915074	0.989317	0.997442	1	1	1	1	1	1
FRUCTOSE	0.338089	0.917442	0.528869	0.994926	0.980937	0.867762	0.924545	0.951427	0.665613	0.576196	0.989317	0.997442	1	1	1	1	1	1
GAMMA-AMINOBUTYRATE	0.57616	0.505356	0.653495	0.999813	0.998564	0.814374	0.999825	0.85273	0.886315	0.771117	0.989317	0.997442	1	1	1	1	1	1
GLUCONATE	0.50126	0.60566	0.784245	0.991406	0.99804	0.827436	0.99946	0.94068	0.903268	0.732233	0.989317	0.997442	1	1	1	1	1	1
GLUCOSAMINATE	0.0527935	0.95464	0.783629	0.598327	0.995128	0.50501	0.458021	0.998599	0.373611	0.253683	0.989317	0.997442	1	1	1	1	1	1
GLUCOSE 6-PHOSPHATE	0.572797	0.643101	0.21955	0.960242	0.616441	0.999857	0.880573	0.941701	0.572505	0.771117	0.989317	0.997442	1	1	1	1	1	1
GLUCURONATE	0.569577	0.223256	0.972355	0.980191	0.823121	0.574917	0.962661	0.797883	0.97196	0.771117	0.989317	0.997442	1	1	1	1	1	1
GLUTAMATE	0.431436	0.681583	0.641509	0.995368	0.921597	0.992631	0.824008	0.999976	0.803868	0.65537	0.989317	0.997442	1	1	1	1	1	1
GLUTAMINE	0.588288	0.651989	0.811764	0.942792	0.959424	0.890846	0.999897	0.998676	0.996199	0.771117	0.989317	0.997442	1	1	1	1	1	1
GLYCERATE	0.108042	0.723492	0.996795	0.638413	0.994278	0.786133	0.488443	0.993883	0.641878	0.342516	0.989317	0.997442	1	1	1	1	1	1
GLYCEROL 3-PHOSPHATE	0.332235	0.989317	0.963738	0.881769	0.999972	0.891062	0.898529	0.999995	0.907116	0.576196	0.989317	0.997442	1	1	1	1	1	1
GLYOXYLATE	0.0205379	0.782677	0.709435	0.449494	0.999875	0.229798	0.411168	0.965849	0.204969	0.144103	0.989317	0.997442	1	1	1	1	1	1
GUANINE	0.0222441	0.493688	0.811173	0.250128	0.988124	0.598051	0.145214	0.909262	0.411135	0.144103	0.989317	0.997442	1	1	1	1	1	1
GUANOSINE	0.00708496	0.112145	0.342955	0.0491022	0.96083	0.780824	0.0174424	0.275352	0.493853	0.105566	0.989317	0.997442	1	1	1	0.430366	1	1
GULONIC ACID GAMMA-LACTONE	0.133923	0.977866	0.584242	0.457148	0.975576	0.679109	0.702533	0.981726	0.891415	0.369528	0.989317	0.997442	1	1	1	1	1	1
HYDROXYPHENYLLACTATE	0.848038	0.718844	0.344086	0.946019	0.973161	0.978453	0.999346	0.782118	0.843158	0.909048	0.989317	0.997442	1	1	1	1	1	1
HYPOXANTHINE	0.718997	0.283361	0.467825	0.861972	0.57176	0.729859	0.95292	0.993911	0.993252	0.836957	0.989317	0.997442	1	1	1	1	1	1
INDOLE-3-ACETATE	0.0112227	0.028538	0.100094	0.0217492	0.968922	0.989723	0.00807503	0.0416163	0.873061	0.128629	0.989317	0.997442	1	1	1	0.357797	1	1
INDOLE-3-CARBOXYLIC ACID	0.00407959	0.517797	0.391351	0.363018	0.998654	0.0543036	0.290304	0.70236	0.0395693	0.0759824	0.989317	0.997442	1	1	1	1	1	1
INDOLE-3-LACTIC ACID	0.714296	0.911582	0.248177	0.691443	0.794216	0.985818	0.997748	0.870644	0.937371	0.836957	0.989317	0.997442	1	1	1	1	1	1
INOSINE	0.230061	0.352778	0.482411	0.982308	0.646639	0.996954	0.429151	0.998298	0.524731	0.511627	0.989317	0.997442	1	1	1	1	1	1
ISOLEUCINE	0.0390332	0.355034	0.72823	0.565925	0.795232	0.808899	0.148916	0.974348	0.297535	0.215405	0.989317	0.997442	1	1	1	1	1	1
ISOMALTOTRIOSE	0.340303	0.343471	0.460937	0.62041	0.623202	0.527475	1	0.99864	0.998515	0.576196	0.989317	0.997442	1	1	1	1	1	1
ISONICOTINIC ACID	0.619991	0.889098	0.776983	0.942934	0.99005	0.967668	0.993905	0.999593	0.998676	0.776292	0.989317	0.997442	1	1	1	1	1	1
ISOVALERALDEHYDE	0.770072	0.892732	0.518455	0.905573	0.942312	0.989741	0.999467	0.982449	0.993973	0.875884	0.989317	0.997442	1	1	1	1	1	1
KYNURENATE	0.435447	0.619481	0.623731	0.797103	0.892343	0.794828	0.996799	1	0.996594	0.65537	0.989317	0.997442	1	1	1	1	1	1
LACTOBIONIC ACID	0.701076	0.674591	0.294347	0.961298	0.966828	0.93792	0.999994	0.715355	0.730282	0.82905	0.989317	0.997442	1	1	1	1	1	1
LEUCINE	0.0218619	0.507469	0.504624	0.586992	0.774431	0.585036	0.14784	1	0.146988	0.144103	0.989317	0.997442	1	1	1	1	1	1
L-METHIONINE SULFOXIDE	0.0378348	0.571524	0.893931	0.365679	0.989222	0.654484	0.228738	0.957594	0.469026	0.215405	0.989317	0.997442	1	1	1	1	1	1
LUMICHROME	0.31179	0.818947	0.150129	0.987841	0.807902	0.806077	0.939924	0.620488	0.30607	0.576196	0.989317	0.997442	1	1	1	1	1	1
MALIC ACID	0.307698	0.864026	0.919901	0.907826	0.997297	0.925284	0.82369	0.999952	0.847982	0.576196	0.989317	0.997442	1	1	1	1	1	1
MALTOTRIOSE	0.384847	0.546455	0.819374	0.857285	0.992879	0.997307	0.715765	0.931659	0.965914	0.599217	0.989317	0.997442	1	1	1	1	1	1
METHYL VANILLATE	0.105769	0.218644	0.227118	0.988662	0.999998	0.18846	0.990341	0.311912	0.193937	0.342516	0.989317	0.997442	1	1	1	1	1	1
METHYLMALONATE	0.0585317	0.933035	0.696024	0.350193	0.986014	0.46799	0.538387	0.99611	0.670836	0.253683	0.989317	0.997442	1	1	1	1	1	1
M-HYDROXYHIPPURIC ACID	0.453684	0.986588	0.349642	0.623299	0.908911	0.951194	0.944812	0.899989	0.999053	0.675989	0.989317	0.997442	1	1	1	1	1	1
MYO-INOSITOL	0.0867818	0.329729	0.527399	0.844907	0.994228	0.228493	0.940665	0.657217	0.33584	0.314347	0.989317	0.997442	1	1	1	1	1	1
N-ACETYLGLUCOSAMINE	0.0580694	0.789479	0.56074	0.749316	0.995739	0.394203	0.615648	0.927809	0.284805	0.253683	0.989317	0.997442	1	1	1	1	1	1
N-ACETYLGLUTAMATE	0.596802	0.283897	0.180357	0.536499	0.996942	0.97797	0.658679	0.32072	0.930403	0.771117	0.989317	0.997442	1	1	1	1	1	1
N-ACETYL-L-GLUTAMINE	0.321771	0.599589	0.711272	0.760078	0.999483	0.985926	0.696175	0.916843	0.968286	0.576196	0.989317	0.997442	1	1	1	1	1	1
N-ACETYLMURAMIC ACID	0.163897	0.918578	0.754789	0.854508	0.998738	0.69649	0.779292	0.990594	0.606235	0.41391	0.989317	0.997442	1	1	1	1	1	1
N-ACETYLSERINE	0.92206	0.497433	0.307283	0.906878	0.994192	0.943049	0.97464	0.616075	0.848583	0.953048	0.989317	0.997442	1	1	1	1	1	1
N-BUTYRYLGLYCINE	0.000669396	0.416882	0.74295	0.0278786	0.984712	0.142148	0.0130076	0.843706	0.0733031	0.024935	0.989317	0.997442	1	1	1	0.387627	1	1
NEPSILON-ACETYL-L-LYSINE	0.357903	0.437999	0.245231	0.449242	0.991506	0.999561	0.618786	0.510182	0.997818	0.578747	0.989317	0.997442	1	1	1	1	1	1
NICOTINATE	0.325051	0.279423	0.590151	0.6933	0.977885	0.999857	0.456226	0.650013	0.987631	0.576196	0.989317	0.997442	1	1	1	1	1	1
N-SUBEROYLGLYCINE	0.819125	0.147694	0.296504	0.793579	0.292229	0.616537	0.804377	0.989657	0.932667	0.898426	0.989317	0.997442	1	1	1	1	1	1
ORNITHINE	0.615786	0.523903	0.315571	0.982558	0.992956	0.844718	0.999648	0.641955	0.700429	0.776292	0.989317	0.997442	1	1	1	1	1	1
OROTATE	0.605508	0.980094	0.957787	0.976276	0.999997	0.984441	0.979457	0.999935	0.986865	0.771117	0.989317	0.997442	1	1	1	1	1	1
OROTIDINE	0.386073	0.344094	0.148919	0.355582	0.327069	0.566383	0.999925	0.981318	0.971727	0.599217	0.989317	0.997442	1	1	1	1	1	1
PANTOTHENATE	0.960342	0.832254	0.957163	0.999849	0.999462	0.99942	0.997588	0.997477	1	0.980075	0.989317	0.997442	1	1	1	1	1	1
P-COUMARIC ACID	0.824754	0.968162	0.525498	0.990485	0.961433	0.999186	0.997592	0.972927	0.92591	0.898426	0.989317	0.997442	1	1	1	1	1	1
PHENYLACETYLGLUTAMINE	0.756449	0.652516	0.628157	0.999269	0.906774	0.999619	0.946668	0.999994	0.939814	0.867007	0.989317	0.997442	1	1	1	1	1	1
PHENYLALANINE	0.325358	0.739285	0.418058	0.999219	0.842773	0.96387	0.777727	0.985333	0.574906	0.576196	0.989317	0.997442	1	1	1	1	1	1
PROLINE	0.119317	0.770252	0.795599	0.551657	0.999995	0.783216	0.537494	0.978529	0.770419	0.349114	0.989317	0.997442	1	1	1	1	1	1
PSEUDOURIDINE	0.22671	0.861458	0.34381	0.997228	0.848696	0.872633	0.747228	0.942524	0.418489	0.511627	0.989317	0.997442	1	1	1	1	1	1
PSICOSE	0.298609	0.979282	0.542931	0.638554	0.96762	0.86559	0.881441	0.974564	0.988642	0.576196	0.989317	0.997442	1	1	1	1	1	1
PTERIN	0.358907	0.614768	0.675425	0.983088	0.910059	0.990087	0.736733	0.999915	0.770738	0.578747	0.989317	0.997442	1	1	1	1	1	1
PYRIDOXINE	0.603416	0.50967	0.235845	0.611274	0.550096	0.830977	0.999612	0.979372	0.960203	0.771117	0.989317	0.997442	1	1	1	1	1	1
PYROCATECHOL	0.992648	0.911778	0.132134	0.683769	0.640283	0.999764	0.999857	0.73378	0.691564	0.997616	0.989317	0.997442	1	1	1	1	1	1
QUINATE	0.000103904	0.544791	0.522736	0.0366746	0.807166	0.034847	0.00514408	0.999995	0.00486816	0.00774086	0.989317	0.997442	1	1	1	0.357797	1	0.725356
QUINOLINATE	0.0166495	0.515935	0.510001	0.126386	1	0.525583	0.127946	0.782882	0.529562	0.144103	0.989317	0.997442	1	1	1	1	1	1
RIBOSE	0.577975	0.459451	0.892279	0.990045	0.971456	0.787518	0.999121	0.921038	0.958846	0.771117	0.989317	0.997442	1	1	1	1	1	1
SACCHAROPINE	0.0172466	0.671405	0.23893	0.763414	0.656271	0.438184	0.174571	0.944394	0.0617627	0.144103	0.989317	0.997442	1	1	1	1	1	1
SERINE	0.406395	0.976443	0.452481	0.668976	0.941868	0.924185	0.937354	0.953127	0.999928	0.624257	0.989317	0.997442	1	1	1	1	1	1
SHIKIMATE	0.00135404	0.727926	0.985548	0.0720373	0.993464	0.11342	0.0423537	0.99519	0.0684343	0.0403504	0.989317	0.997442	1	1	1	0.788838	1	1
SINAPIC ACID	0.0292395	0.135063	0.128256	0.948503	0.999997	0.0539164	0.942858	0.151057	0.0516876	0.174268	0.989317	0.997442	1	1	1	1	1	1
TAURINE	0.603036	0.411141	0.411098	0.996116	0.6416	0.996119	0.769247	1	0.769217	0.771117	0.989317	0.997442	1	1	1	1	1	1
TAUROHYODEOXYCHOLATE	0.643151	0.565389	0.575396	0.881738	0.846206	0.877289	0.999805	1	0.999872	0.79858	0.989317	0.997442	1	1	1	1	1	1
THIOCYANATE	0.329257	0.329257	0.329257	1	1	0.50544	1	0.50544	0.50544	0.576196	0.989317	0.997442	1	1	1	1	1	1
THREONIC ACID	0.112666	0.419265	0.445649	0.338241	0.673876	0.322505	0.933903	0.999987	0.923451	0.349114	0.989317	0.997442	1	1	1	1	1	1
THREONINE	0.476438	0.810901	0.775567	0.989472	0.981393	0.985864	0.901752	0.999987	0.888977	0.702863	0.989317	0.997442	1	1	1	1	1	1
THYMINE	0.24695	0.531108	0.839805	0.896424	0.932252	0.978887	0.577086	0.989759	0.757714	0.526658	0.989317	0.997442	1	1	1	1	1	1
TRANS-ACONITATE	0.30381	0.662974	0.562033	0.987296	0.999581	0.717479	0.97199	0.884018	0.655998	0.576196	0.989317	0.997442	1	1	1	1	1	1
TRIGONELLINE	0.302686	0.747998	0.233743	0.999358	0.918487	0.763097	0.953854	0.694433	0.392388	0.576196	0.989317	0.997442	1	1	1	1	1	1
TRYPTOPHAN	0.00998566	0.48739	0.901552	0.250011	0.93427	0.449167	0.0883091	0.975817	0.186848	0.123989	0.989317	0.997442	1	1	1	1	1	1
TYROSINE	0.208361	0.774302	0.893094	0.842902	0.990156	0.890462	0.67893	0.999516	0.742394	0.492791	0.989317	0.997442	1	1	1	1	1	1
URACIL 5-CARBOXYLATE	0.000264145	0.539404	0.87439	0.0321362	0.944159	0.0631727	0.00960528	0.987414	0.0197865	0.0131192	0.989317	0.997442	1	1	1	0.357797	1	1
UREIDOPROPIONATE	0.107559	0.959162	0.751667	0.503086	0.993384	0.616972	0.661113	0.997477	0.770724	0.342516	0.989317	0.997442	1	1	1	1	1	1
UREIDOSUCCINIC ACID	0.10403	0.140858	0.515292	0.881467	0.925815	0.134345	0.999359	0.426671	0.363329	0.342516	0.989317	0.997442	1	1	1	1	1	1
URIC ACID	0.568713	0.956126	0.487647	0.999727	0.948311	0.982152	0.969023	0.966739	0.799869	0.771117	0.989317	0.997442	1	1	1	1	1	1
URIDINE	0.0596781	0.235942	0.450071	0.237336	0.988395	0.946098	0.137496	0.508628	0.821644	0.253683	0.989317	0.997442	1	1	1	1	1	1
VALINE	0.13027	0.253935	0.887671	0.742922	0.788335	0.991659	0.24121	0.884142	0.623685	0.366231	0.989317	0.997442	1	1	1	1	1	1
VANILLIC ACID	0.148111	0.828081	0.929873	0.677764	0.999706	0.800705	0.622221	0.996189	0.750707	0.387166	0.989317	0.997442	1	1	1	1	1	1
XANTHINE	0.00388423	0.20798	0.986352	0.12681	0.80088	0.520944	0.0202185	0.788028	0.132604	0.0759824	0.989317	0.997442	1	1	1	0.430366	1	1
