# Supplementary material for: A dynamic rhizosphere interplay between tree roots and soil bacteria under drought stress
Source: eLife. 2022 Jul 20;11:e79679. doi: 10.7554/eLife.79679 (PMC9385208; doi:10.7554/eLife.79679)
Supplement: Figure 3—source data 2. [file elife-79679-fig3-data2.xlsx]

## Sheet: Legend
Dataset S5: Root exudates semi-polar metabolites in LC-MS experiment.
(A) Annotation of metabolites (detected by LC-MS) that significantly changed in exudates under drought (See also Fig. S4B)
(B) Mass signal (detected by LC-MS) enriched in exudates of drought with bacteria treated trees as compared to drought w/o bacteria treated trees.
(C) Mass signal (detected by LC-MS) enriched in exudates of drought with bactaria treated vs. drought treated trees as compared to irrigated treated trees.
(D) Mass signal (detected by LC-MS) enriched in exudates of drought with bactaria treated vs. drought treated trees as compared to irrigated with bacteria vs. irrigated w/o bacteria treated trees.
(E) Anova of a given semi polar metabolite (detected by LC-MS) in Drought peirod
(F) Anova of a given semi polar metabolite (detected by LC-MS) in Reirrigate peirod
(G) Anova of given Mass signal (detected by LC-MS) in Drought peirod
(H) Anova of given Mass signal (detected by LC-MS) in Reirrigate peirod

## Sheet: A
	treatments		DB/D	DB	DB	DB	DB	D	D	D	D	D	IB	IB	IB	IB	I	I	I	I	I	I
No.	Sample number // metabolite	Chamical Class	t-test	1	2	3	4	1	2	3	4	5	1	2	3	4	1	2	3	4	5	6
1	(7R,8S)-dihydrodehydrodiconiferyl alcohol 9-O-beta-D-glucopyranoside isomer 1	guaiacyl lignin and a primary alcohol	0.756	0	0	0.767103	1.03249	0	0	0	2.12423	0	0	0	0	0	0	0	0	0	0	0
2	(7R,8S)-dihydrodehydrodiconiferyl alcohol 9-O-beta-D-glucopyranoside isomer 2	guaiacyl lignin and a primary alcohol	0.58293	0	0	2.90222	0.919398	0	0	0	1.57354	0	0	0	0	0	0	0	0	0	0	0
3	(Z)-9-Octadecanoic acid (Oleic acid)	fatty acid	0.25833	0.639755	0	1.36264	0	0	0	0	0	0	0	1.08453	0	0	0.410312	0	0	0	0	0
4	15-​hydroxy-​16-​methoxy-9,​12-​Octadecadienoic acid (NP-020886) isomer 1	linoleic acid derivatives	0.45664	0	1.12743	1.08201	0.672395	1.12612	0.864711	0.928235	0	0.668473	0	0.644238	0.727279	0	1.0261	0.911037	0.956147	0.699653	0.922602	0
5	4-Hydroxybenzaldehyde	phenolic aldehydes, benzoic derivative	0.90504	0.588502	0.736371	0.878925	0	0	0.627111	0	0	1.2447	0.667943	0.795565	0	0	0	1.03302	0.78416	0.993397	0.973002	0
6	Abietic acid	abietane diterpenoid	0.84691	0	1.25177	0	0	1.01716	1.64192	0	2.12111	0	0.986538	0.893404	1.06742	0	0	0	0.704636	0	0	1.452
7	Abscisic acid methyl ester (NP-020761) isomer 1	abscisic acid derivatives	0.99937	3.49202	4.36793	4.72503	4.86697	4.41853	4.63586	4.13135	4.17691	4.48975	4.06516	4.08644	4.42038	5.05778	4.22199	4.05847	4.13565	4.26946	4.85482	4.01225
8	Abscisic acid methyl ester (NP-020761) isomer 2	abscisic acid derivatives	0.97298	3.17963	1.78722	1.44376	0	2.30371	0	2.38627	0	1.54604	0	0.844168	2.74886	0	2.17388	3.19254	2.51947	0	1.98035	2.07456
9	Dihydroxyphaseic acid 1-O-glucoside	phaseic acid	0.74161	1.64453	6.38579	15.1838	18.6513	1.62417	1.51901	1.17569	27.1949	4.98956	17.3173	3.28748	0.50219	7.46753	0	2.65713	2.018	3.3511	5.00755	4.18818
10	Feruloyl hexose	ferulic acid, Sugar derivatives	0.49148	0	0	5.04721	0	0	0	0	0.716656	0	0	0	0	0.733391	0	0	0	0	0	0
11	Glycerol 1-myristate	glycerol derivative	0.99848	0	2.34405	0.675592	1.94639	0.933366	1.43239	1.36599	1.14268	0.721997	0	0.945438	0	0	0.948653	0.818082	0	1.0835	0	2.03046
12	Guaiacylglycerol 4-O-vanillic acid ether isomer 1	phenolic acid	0.41515	0	4.03775	2.96567	6.92194	0	3.48196	0	2.92644	0	7.51855	1.35915	0	4.51029	0	0	2.22909	0.972652	1.33563	3.96374
13	Guaiacylglycerol 4-O-vanillic acid ether isomer 2	phenolic acid	0.52298	0	3.21544	3.68715	8.20095	0	2.99211	0	2.66824	0	7.15111	1.67869	0	4.13811	0	0	3.79377	1.45625	1.18251	4.7693
14	Isomaltose	sptarch digestion	0.03157	0	6.54534	20.1024	11.0372	0	4.44401	0	0	0	3.08821	0	1.7394	0	0	0	2.40129	3.53104	0	0
15	Lauryl gallate isomer 1	gpallic acid (GA), (triphenol) derivatives	0.99053	1.3537	1.69511	1.61158	1.62925	1.8508	1.99534	1.61535	1.45231	1.59162	1.23513	1.79278	1.79687	1.77557	1.45684	1.52711	1.47683	1.76409	1.8338	0
16	Lauryl gallate isomer 2	gallic acid (GA), (triphenol) derivatives	0.99318	1.42335	0	0	1.61387	0	0	0	1.40208	1.6815	1.22091	1.74535	0	1.56663	1.49085	0	1.51114	1.30349	0	0
17	Clerodane diterpenes (NP-022300)	clerodane derivatives	0.01245	1.2068	2.50747	0.974579	0	0.691824	0	0	0	0	14.0158	4.00328	0.987926	0	0	0	0	1.01895	0	0.670388
18	NP-022474		0.02106	0	1.61454	2.06401	0	2.27626	1.8099	2.77588	1.28638	1.66242	0	2.84885	0	1.86661	1.90181	2.04333	2.72366	1.51172	3.17813	1.36303
19	Palmitoleic acid ((Z)-9-Hexadecenoic acid)-like	omega-7 monounsaturated fatty acid	0.76378	0.661646	0.847317	2.87752	1.27119	0.868477	1.00961	0.890766	0.989931	1.05055	0.738756	2.60189	0.912509	1.11674	0.655722	0.785803	0.731067	1.05375	1.05907	0.974073
20	Protocatechuic acid (dihydroxybenzoic acid)	phenolic acid, benzoic derivative	0.04051	0	13.1448	5.62248	10.6311	0	0	0	6.53993	0	11.9093	0.808751	0	0.737665	0	0	1.07588	3.28211	0	1.76227
	* In red treatment differs significantly
	*NP- natural product

## Sheet: B
Peak names (4345)	700.92970_24.392_9.27	550.05360_24.241_7.61	531.46534_24.187_7.46	573.67693_24.052_7.81	597.07496_24.371_8.11	552.32913_24.251_7.61	701.42258_24.408_9.26	292.72236_9.736_5.42	573.49173_24.313_7.91	624.57964_23.888_8.50	762.26269_24.256_9.67	530.75278_24.189_7.50	559.39200_29.441_7.51	659.80028_24.007_8.80	543.99844_23.929_7.56	651.19550_23.965_8.71	592.69472_24.123_8.15	531.89283_24.223_7.78	612.09619_24.413_8.37	611.22701_24.408_8.35	552.18743_24.248_7.68	665.06990_24.320_8.90	577.48554_24.326_7.99	585.84951_24.106_8.10	701.62478_24.101_9.15	593.97243_23.696_8.03	530.89728_24.184_7.43	629.78103_23.918_8.55	643.59845_23.922_8.61	597.93718_24.377_8.20	585.16794_23.650_7.94	596.86103_24.135_8.06	585.57053_23.649_7.94	526.03181_24.201_7.66	710.43010_24.124_9.23	515.17467_30.698_7.90	611.70273_24.172_8.08	603.76828_23.781_8.24	611.58369_23.780_8.21	543.18673_24.241_7.75	603.97012_23.755_8.17	674.41166_24.020_8.89	570.34777_24.046_7.91	585.95419_23.738_8.19	600.52578_24.151_8.29	532.65568_23.945_7.82	650.99525_23.978_8.72	547.04504_24.255_7.79	577.35191_23.647_7.99
Drought with bacteria_1	0	0	0	0	0	0	0	577.02	0	0	0	0	0	0	0	0	0	0	0	0	0	0	0	0	0	1212.35	0	0	0	0	0	0	0	0	0	0	0	0	0	0	0	0	0	0	0	0	0	0	0
Drought with bacteria_2	0	608.26	0	0	526.37	0	0	0	0	0	0	0	0	0	0	552.7	757	0	1280.15	0	0	0	0	0	0	0	0	592.16	1025.19	0	1444.62	0	0	0	0	8782.33	2441.35	0	0	0	0	1915.51	1794.97	0	0	0	0	1221.22	1069.71
Drought with bacteria_3	0	0	0	0	0	0	0	0	0	0	0	0	0	0	0	0	0	0	0	0	0	0	0	0	0	0	0	0	0	0	0	0	0	0	0	0	0	0	0	0	0	0	0	0	0	0	0	0	0
Drought with bacteria_4	0	0	0	0	0	0	0	0	0	0	0	0	0	0	0	0	0	0	0	0	0	0	0	0	0	0	0	0	0	0	0	0	0	0	0	0	0	0	0	0	0	0	0	0	0	0	0	0	0
Drought w/o bacteria _1	1450.65	2997.19	1821.12	0	2030.37	3055.69	1345.54	0	0	1436.33	0	730.99	0	936.98	1275.41	1375.31	0	1422.36	8845.71	2826.83	3804.24	4266.47	4725.57	887.73	1513.25	812.25	831.13	0	2150.98	4271.01	2031.44	0	942.18	2738.92	945.85	9273.07	4037.07	2214.95	1643.21	1355.84	0	0	0	0	1372.08	987.26	0	5085.42	1300.68
Drought w/o bacteria _2	0	0	0	0	0	0	0	0	0	0	0	0	1457.11	0	0	0	0	0	0	0	0	0	0	0	0	0	0	0	0	0	0	0	0	0	0	0	0	0	0	0	0	0	0	0	0	0	0	0	0
Drought w/o bacteria _3	0	0	0	447.43	0	0	0	0	1969.22	0	868.01	0	443.92	0	586.38	0	787.82	0	0	0	0	0	0	0	513.51	0	0	0	0	0	0	1482.14	496.77	0	0	0	0	0	0	0	1061.64	1807.53	0	478.67	0	0	496.73	0	0
Drought w/o bacteria _4	0	0	0	0	0	0	0	0	0	0	0	0	0	0	0	0	0	0	0	0	0	413.87	0	0	0	0	0	0	0	0	0	0	0	0	0	0	0	0	0	0	0	0	0	0	0	0	0	0	0
Drought w/o bacteria _5	2204.15	0	1971.33	1504.34	6175.25	1271.43	2801.16	568.11	6610.25	628.1	832.99	2523.6	0	523.94	0	0	1433.05	1028.15	8249.12	7216.72	1250.93	0	7432.94	694.94	0	0	1771.69	1043.6	1155.39	6077.49	0	3262.02	0	2167.23	767.03	0	463.7	518.18	596.95	2028.89	1088.54	0	2561.81	513.68	1261.97	620.53	804.33	2422.65	738.28
[truncated: 4,296 more columns]

## Sheet: C
Peak names (160)	561.78173_24.277_7.74	770.27907_24.262_9.79	700.92970_24.392_9.27	535.66380_23.890_7.44	573.67693_24.052_7.81	597.07496_24.371_8.11	604.17151_23.746_8.15	734.85568_24.183_9.46	728.04086_24.168_9.40	624.57964_23.888_8.50	559.39200_29.441_7.51	659.80028_24.007_8.80	543.99844_23.929_7.56	592.69472_24.123_8.15	612.09619_24.413_8.37	611.22701_24.408_8.35	594.96239_23.745_8.17	701.62478_24.101_9.15	643.59845_23.922_8.61	596.86103_24.135_8.06	585.57053_23.649_7.94	611.70273_24.172_8.08	603.76828_23.781_8.24	611.58369_23.780_8.21	603.97012_23.755_8.17	674.41166_24.020_8.89	585.95419_23.738_8.19	650.99525_23.978_8.72	547.04504_24.255_7.79	577.35191_23.647_7.99	612.53722_24.182_8.32	588.35583_24.111_8.05	532.48862_23.949_7.83	547.49975_23.996_7.92	600.03107_24.143_8.24	553.19229_24.261_7.69	560.20070_24.273_7.77	594.75964_23.779_8.26	639.71920_24.255_8.50	594.37550_23.696_8.03	542.33444_23.349_7.46	650.15889_23.178_8.51	558.95426_23.485_7.66	619.80561_24.424_8.36	648.39762_23.929_8.62	550.62140_24.243_7.63	577.39168_29.781_8.25	251.12793_9.756_5.18	674.61241_24.017_8.90
Drought with bacteria_1	0	0	0	0	0	0	0	0	0	0	0	0	0	0	0	0	0	0	0	0	0	0	0	0	0	0	0	0	0	0	0	0	0	0	0	0	0	0	0	0	746.406	678.558	1658.01	0	0	0	0	0	0
Drought with bacteria_2	0	0	0	0	0	710.742	0	0	0	0	0	0	0	1022.16	1728.55	0	0	0	1384.28	0	0	3296.49	0	0	0	2586.46	0	0	1648.98	1444.4	1431.22	679.862	1173.36	685.33	1372.09	0	1596.35	738.153	2747.48	854.897	0	0	0	0	0	0	837.938	0	2688.93
Drought with bacteria_3	0	0	0	0	0	0	0	0	0	0	0	0	0	0	0	0	0	0	0	0	0	0	0	0	0	0	0	0	0	0	0	0	0	0	0	0	0	0	0	0	0	0	0	0	0	0	0	0	0
Drought with bacteria_4	0	0	0	0	0	0	0	0	0	0	0	0	0	0	0	0	0	0	0	0	0	0	0	0	0	0	0	0	0	0	0	0	0	0	0	0	0	0	0	0	0	0	0	0	0	0	0	0	0
Drought w/o bacteria _2	0	0	1943.77	3124.43	0	2720.56	1779.93	1557	1508.92	1924.59	0	1255.49	1708.96	0	11852.7	3787.76	1844.04	2027.65	2882.17	0	1262.46	5409.4	2967.88	2201.79	0	0	0	0	6814.12	1742.82	2634.67	3235.84	917.8	4422.46	0	3106.37	0	1256.88	3047.29	1259.44	1225.39	1286.21	2155.13	6441.98	2781.14	0	0	0	4689.94
Drought w/o bacteria _3	0	0	0	0	0	0	0	0	0	0	2077.13	0	0	0	0	0	0	0	0	0	0	0	0	0	0	0	0	0	0	0	0	0	0	0	0	0	0	0	0	0	0	0	0	0	0	0	3580.15	2390.3	0
Drought w/o bacteria _4	0	0	0	0	612.829	0	0	0	0	0	608.021	0	803.144	1079.05	0	0	0	703.336	0	2030.03	680.408	0	0	0	1454.09	2475.71	655.617	680.353	0	0	1160.52	0	0	0	911.676	1916.53	726.689	0	0	1715.39	0	642.852	644.208	1042.2	1196.77	2099.67	623.225	2854.12	2497.86
Drought w/o bacteria _5	0	0	0	0	0	0	0	0	0	0	0	0	0	0	0	0	0	0	0	0	0	0	0	0	0	0	0	0	0	0	0	0	0	0	0	0	0	0	0	0	0	0	0	0	0	550.373	558.168	887.518	0
Drought w/o bacteria _6	0	0	3532.86	0	2411.19	9897.83	0	0	0	1006.73	0	839.783	0	2296.92	13221.9	11567.1	0	0	1851.88	5228.44	0	743.229	830.55	956.805	1744.74	0	823.338	1289.2	3883.08	1183.33	0	4673.19	1652.41	1542.14	2614.17	0	2825.68	950.826	7835.16	0	776.984	0	0	1223.63	1148.09	3456.76	0	0	2905.55
Irrigated_1	5435.26	1812.83	0	3835.56	1527.58	0	3170.63	1395.04	1539.88	2179.67	919.97	1597.35	2726.73	0	8691.4	1190.68	1476.63	2955.54	2769.69	2571.54	1769.61	2718.49	4807.22	5145.46	5437.56	0	1762.63	1924.31	2163.55	1423.42	3822.95	0	1382.77	1520.26	0	0	5724.49	2065.62	0	3914.98	1477.8	1605.02	1694.16	2626.67	3794.87	0	0	0	0
Irrigated_2	0	0	0	1427.32	0	0	0	0	0	0	0	0	0	0	0	0	0	0	0	0	0	0	0	0	1508.57	0	0	0	0	0	0	0	0	0	0	0	0	0	1819.75	847.843	0	0	745.867	0	0	2522.56	0	0	0
Irrigated_3	0	0	0	0	0	0	0	0	0	0	0	0	0	0	0	0	0	0	0	0	0	0	0	0	0	0	0	0	0	0	0	0	0	0	0	0	0	0	0	0	0	0	0	0	0	0	0	0	0
Irrigated_4	0	0	0	0	0	0	982.177	0	0	0	0	0	0	0	0	2201.96	0	0	0	1058.63	0	0	0	0	0	0	0	0	0	0	0	1430.65	0	0	857.097	2400.8	2697.58	0	3627.16	0	0	0	0	0	0	0	0	0	0
Irrigated_5	0	0	0	0	0	0	0	0	0	0	0	0	0	0	0	0	0	0	0	0	0	0	0	0	0	1814.2	0	0	0	0	0	0	0	0	0	0	0	0	0	0	0	0	0	0	0	0	0	4265.23	0
Irrigated_6	2292.76	1045.21	1149.37	0	0	1987.66	0	610.204	1008.11	0	564.078	0	0	893.129	0	0	574.746	735.283	0	0	0	0	0	0	0	1723.32	0	591.711	0	0	1740.65	0	562.336	626.954	833.02	3483.63	0	605.725	0	0	0	0	0	0	0	2722.94	0	0	1887.25
[truncated: 1,139 more columns]

## Sheet: D
Peak names (2852)	561.78173_24.277_7.74	770.27907_24.262_9.79	700.92970_24.392_9.27	535.66380_23.890_7.44	531.46534_24.187_7.46	573.67693_24.052_7.81	597.07496_24.371_8.11	604.17151_23.746_8.15	734.85568_24.183_9.46	552.32913_24.251_7.61	701.42258_24.408_9.26	485.06125_21.014_6.83	624.53116_24.443_8.52	618.24213_24.428_8.43	728.04086_24.168_9.40	573.49173_24.313_7.91	624.57964_23.888_8.50	762.26269_24.256_9.67	530.75278_24.189_7.50	559.39200_29.441_7.51	659.80028_24.007_8.80	543.99844_23.929_7.56	486.04861_21.015_6.81	592.69472_24.123_8.15	528.32045_24.201_7.63	531.89283_24.223_7.78	612.09619_24.413_8.37	611.22701_24.408_8.35	546.90093_24.243_7.67	552.18743_24.248_7.68	665.06990_24.320_8.90	594.96239_23.745_8.17	577.48554_24.326_7.99	585.84951_24.106_8.10	701.62478_24.101_9.15	532.46346_24.213_7.69	586.15739_23.691_8.06	530.89728_24.184_7.43	643.59845_23.922_8.61	597.93718_24.377_8.20	596.86103_24.135_8.06	585.57053_23.649_7.94	526.03181_24.201_7.66	710.43010_24.124_9.23	611.70273_24.172_8.08	603.76828_23.781_8.24	611.58369_23.780_8.21	543.18673_24.241_7.75	603.97012_23.755_8.17
Drought with bacteria_1	0	0	0	0	0	0	0	0	0	0	0	0	0	0	0	0	0	0	0	0	0	0	0	0	0	0	0	0	0	0	0	0	0	0	0	0	0	0	0	0	0	0	0	0	0	0	0	0	0
Drought with bacteria_2	0	0	0	0	0	0	710.742	0	0	0	0	0	0	0	0	0	0	0	0	0	0	0	0	1022.16	0	0	1728.55	0	0	0	0	0	0	0	0	0	0	0	1384.28	0	0	0	0	0	3296.49	0	0	0	0
Drought with bacteria_3	0	0	0	0	0	0	0	0	0	0	0	0	0	0	0	0	0	0	0	0	0	0	0	0	0	0	0	0	0	0	0	0	0	0	0	0	0	0	0	0	0	0	0	0	0	0	0	0	0
Drought with bacteria_4	0	0	0	0	0	0	0	0	0	0	0	0	0	0	0	0	0	0	0	0	0	0	0	0	0	0	0	0	0	0	0	0	0	0	0	0	0	0	0	0	0	0	0	0	0	0	0	0	0
Drought w/o bacteria _1	0	0	1943.77	3124.43	2440.18	0	2720.56	1779.93	1557	4094.42	1802.93	0	7448.48	3327.84	1508.92	0	1924.59	0	979.477	0	1255.49	1708.96	1232.31	0	2968.15	1905.87	11852.7	3787.76	0	5097.42	5716.78	1844.04	6331.94	1189.5	2027.65	0	0	1113.66	2882.17	5722.86	0	1262.46	3669.97	1267.38	5409.4	2967.88	2201.79	1816.73	0
Drought w/o bacteria _2	0	0	0	0	0	0	0	0	0	0	0	0	0	0	0	0	0	0	0	2077.13	0	0	0	0	0	0	0	0	0	0	0	0	0	0	0	0	0	0	0	0	0	0	0	0	0	0	0	0	0
Drought w/o bacteria _3	0	0	0	0	0	612.829	0	0	0	0	0	0	0	0	0	2697.17	0	1188.88	0	608.021	0	803.144	0	1079.05	0	0	0	0	0	0	0	0	0	0	703.336	0	1257.39	0	0	0	2030.03	680.408	0	0	0	0	0	0	1454.09
Drought w/o bacteria _4	0	0	0	0	0	0	0	0	0	0	0	0	0	0	0	0	0	0	0	0	0	0	0	0	0	0	0	0	0	0	600.82	0	0	0	0	0	0	0	0	0	0	0	0	0	0	0	0	0	0
Drought w/o bacteria _5	0	0	3532.86	0	3159.69	2411.19	9897.83	0	0	2037.88	4489.76	0	0	0	0	10595.1	1006.73	1335.13	4044.88	0	839.783	0	0	2296.92	0	1647.94	13221.9	11567.1	2221.75	2005.02	0	0	11913.7	1113.87	0	2043.66	0	2839.7	1851.88	9741.14	5228.44	0	3473.68	1229.41	743.229	830.55	956.805	3251.95	1744.74
Irrigated with bacteria _1	0	0	0	0	0	0	0	0	0	0	0	0	0	0	0	0	0	0	0	0	0	0	0	0	0	0	0	0	0	0	0	0	0	0	0	0	0	0	0	0	0	0	0	0	0	0	0	0	0
Irrigated with bacteria _2	0	0	0	0	0	0	0	0	0	0	0	0	0	0	0	0	0	0	0	0	0	0	0	749.284	0	0	0	0	0	0	0	0	0	0	0	0	0	0	0	0	0	0	0	0	987.654	0	0	0	1234.29
Irrigated with bacteria _3	0	0	0	0	0	0	0	1529.64	0	0	0	0	0	0	0	0	0	0	0	0	0	0	0	0	0	0	3032.77	1577.34	2603.22	1773.71	1698.32	0	2041.65	702.688	0	788.817	0	0	0	2259.58	0	0	731.627	0	0	0	0	769.464	0
Irrigated with bacteria _4	0	0	0	0	0	0	0	0	0	0	0	0	0	0	0	0	0	0	0	0	0	0	0	0	0	0	0	0	0	0	0	0	0	0	0	0	0	0	0	0	0	0	0	0	0	0	0	0	0
Irrigated w/o bacteria _1	5435.26	1812.83	0	3835.56	0	1527.58	0	3170.63	1395.04	1115.85	0	1062.31	4615.66	3438.16	1539.88	0	2179.67	1629.85	4824.95	919.97	1597.35	2726.73	1207.54	0	4023.85	1431.47	8691.4	1190.68	4590.88	0	0	1476.63	0	1901.68	2955.54	5650.5	4631.88	2447.82	2769.69	2982.27	2571.54	1769.61	1342.26	2530.37	2718.49	4807.22	5145.46	1726.83	5437.56
Irrigated w/o bacteria _2	0	0	0	1427.32	0	0	0	0	0	0	0	829.003	0	0	0	1478.94	0	0	0	0	0	0	768.712	0	0	0	0	0	1356.28	2641.71	0	0	0	0	0	0	0	0	0	0	0	0	0	0	0	0	0	0	1508.57
Irrigated w/o bacteria _3	0	0	0	0	0	0	0	0	0	0	0	0	0	0	0	0	0	0	0	0	0	0	0	0	0	0	0	0	0	0	0	0	0	0	0	0	0	0	0	0	0	0	0	0	0	0	0	0	0
Irrigated w/o bacteria _4	0	0	0	0	0	0	0	982.177	0	0	1425.8	0	0	1950.68	0	0	0	0	0	0	0	0	0	0	1057.94	1084.36	0	2201.96	0	722.327	0	0	0	0	0	0	0	0	0	0	1058.63	0	0	751.251	0	0	0	0	0
Irrigated w/o bacteria _5	0	0	0	0	0	0	0	0	0	0	0	0	0	0	0	0	0	0	0	0	0	0	0	0	0	0	0	0	0	0	2873.39	0	0	0	0	0	0	0	0	0	0	0	0	0	0	0	0	0	0
Irrigated w/o bacteria _6	2292.76	1045.21	1149.37	0	0	0	1987.66	0	610.204	0	2292.43	0	3716.61	0	1008.11	0	0	1240.06	0	564.078	0	0	0	893.129	0	0	0	0	0	0	2952.88	574.746	3443.19	0	735.283	1771.28	800.756	2213.17	0	0	0	0	787.888	0	0	0	0	842.48	0
[truncated: 2,803 more columns]

## Sheet: E
Metabolite	I.p	B.p	Interaction.p	I/D	DB/D	IB/I	IB/D	DB/I	DB/IB	I.fdr	B.fdr	Interaction.fdr	I/D.fdr	DB/D.fdr	IB/D.fdr	DB/I.fdr	IB/I.fdr	DB/IB.fdr
X.7R.8S..dihydrodehydrodiconiferyl.alcohol.9.O.beta.D.glucopyranoside.isomer.1	0.102115	0.96273	0.961269	0.584247	0.999879	0.658535	0.589284	1	0.655365	0.510574	0.96273	0.981284	0.999975	1	0.999993	0.999819	1	0.999799
X.7R.8S..dihydrodehydrodiconiferyl.alcohol.9.O.beta.D.glucopyranoside.isomer.2	0.0866948	0.366846	0.348875	0.883453	0.552078	0.91067	0.204213	1	0.269817	0.510574	0.61141	0.69775	0.999975	1	0.999993	0.999819	1	0.999799
X.Z..9.Octadecanoic.acid..Oleic.acid.	0.689759	0.076115	0.425308	0.991213	0.264627	0.731988	0.350362	0.851271	0.83885	0.883864	0.26046	0.708846	0.999975	1	0.999993	0.999819	1	0.999799
X15..U.200B.hydroxy..U.200B.16..U.200B.methoxy.9..U.200B.12..U.200B.Octadecadienoic.acid..NP.020886..isomer.1	0.52072	0.30808	0.319588	0.99909	1	0.578613	0.999421	0.476123	0.61234	0.883864	0.560145	0.69775	0.999975	1	0.999993	0.999819	1	0.999799
X4.Hydroxybenzaldehyde	0.749254	0.817249	0.339428	0.814707	0.945677	0.999993	0.993802	0.828114	0.946527	0.883864	0.860262	0.69775	0.999975	1	0.999993	0.999819	1	0.999799
Abietic.acid	0.627702	0.733791	0.139532	0.516904	0.538862	0.965549	0.999596	0.838394	0.828276	0.883864	0.815323	0.69775	0.999975	1	0.999993	0.999819	1	0.999799
Abscisic.acid.methyl.ester..NP.020761..isomer.1	0.795478	0.700445	0.68345	0.967158	0.999992	0.999048	0.97751	0.939234	0.99859	0.883864	0.815323	0.969131	0.999975	1	0.999993	0.999819	1	0.999799
Abscisic.acid.methyl.ester..NP.020761..isomer.2	0.791268	0.487841	0.213676	0.73787	0.970046	0.971571	0.957485	0.510823	0.838443	0.883864	0.650455	0.69775	0.999975	1	0.999993	0.999819	1	0.999799
Dihydroxyphaseic.acid.1.O.glucoside	0.255482	0.306631	0.877672	0.772009	0.923742	0.999989	0.435139	0.819492	0.924606	0.752729	0.560145	0.981284	0.999975	1	0.999993	0.999819	1	0.999799
Feruloyl.hexose	0.301092	0.256064	0.397135	0.996796	0.491477	0.999948	0.359438	0.994509	0.562961	0.752729	0.560145	0.708846	0.999975	1	0.999993	0.999819	1	0.999799
Glycerol.1.myristate	0.0887698	0.474987	0.304642	0.889734	0.993733	0.284558	0.785089	0.597551	0.227323	0.510574	0.650455	0.69775	0.999975	1	0.999993	0.999819	1	0.999799
Guaiacylglycerol.4.O.vanillic.acid.ether.isomer.1	0.948706	0.078138	0.903265	0.999675	0.518261	0.568231	0.538282	0.590618	0.999799	0.948706	0.26046	0.981284	0.999975	1	0.999993	0.999819	1	0.999799
Guaiacylglycerol.4.O.vanillic.acid.ether.isomer.2	0.924602	0.106447	0.591408	0.960483	0.415155	0.597059	0.641961	0.82633	0.989854	0.948706	0.302187	0.909858	0.999975	1	0.999993	0.999819	1	0.999799
Hesperidine..Neohesperidin	NA	NA	NA	NA	NA	NA	NA	NA	NA	NA	NA	NA	NA	NA	NA	NA	NA	NA
Isomaltose	0.0731192	0.0417644	0.0444325	0.999975	0.0315689	0.999408	0.0268243	0.999785	0.052774	0.510574	0.26046	0.69775	0.999975	0.631377	0.999993	0.536486	1	0.999799
Lauryl.gallate.isomer.1	0.381943	0.632911	0.293716	0.533008	0.96939	0.997948	0.841332	0.691557	0.993901	0.848763	0.791139	0.69775	0.999975	1	0.999993	0.999819	1	0.999799
Lauryl.gallate.isomer.2	0.598384	0.469604	0.726848	0.996944	0.993723	0.787182	0.999819	0.861688	0.916793	0.883864	0.650455	0.969131	0.999975	1	0.999993	0.999819	1	0.999799
NP.022300	0.289624	0.0554662	0.225175	0.9998	0.950903	0.129073	0.963913	0.125475	0.34104	0.752729	0.26046	0.69775	0.999975	1	0.999993	0.999819	1	0.999799
NP.022474	0.580251	0.039328	0.909824	0.992268	0.383208	0.61337	0.24129	0.436154	0.979295	0.883864	0.26046	0.981284	0.999975	1	0.999993	0.999819	1	0.999799
Palmitoleic.acid...Z..9.Hexadecenoic.acid..like	0.722015	0.120875	0.981284	0.995262	0.681514	0.781823	0.525799	0.635262	0.998193	0.883864	0.302187	0.981284	0.999975	1	0.999993	0.999819	1	0.999799
Protocatechuic.acid..dihydroxybenzoic.acid.	0.287545	0.0434319	0.338528	0.999379	0.156857	0.869788	0.111623	0.803066	0.516595	0.752729	0.26046	0.69775	0.999975	1	0.999993	0.999819	1	0.999799

## Sheet: F
Metabolite	I.p	B.p	Interaction.p	I/D	DB/D	IB/I	IB/D	DB/I	DB/IB	I.fdr	B.fdr	Interaction.fdr	I/D.fdr	DB/D.fdr	IB/D.fdr	DB/I.fdr	IB/I.fdr	DB/IB.fdr
X.7R.8S..dihydrodehydrodiconiferyl.alcohol.9.O.beta.D.glucopyranoside.isomer.1	0.131723	0.131723	0.131723	0.15122	0.15122	0.15122	1	1	1	0.937919	0.420552	0.813913	0.999999	0.999529	0.956646	1	1	1
X.7R.8S..dihydrodehydrodiconiferyl.alcohol.9.O.beta.D.glucopyranoside.isomer.2	0.132733	0.132733	0.132733	0.152876	0.152876	0.152876	1	1	1	0.937919	0.420552	0.813913	0.999999	0.999529	0.956646	1	1	1
X.Z..9.Octadecanoic.acid..Oleic.acid.	0.982048	0.322188	0.856915	0.998869	0.934353	0.895216	0.882316	0.831482	0.999465	0.982048	0.637476	0.96403	0.999999	0.999529	0.999999	1	1	1
X1..2.methoxy.octadecanyl..sn.glycero.3.phosphoserine	0.521066	0.760883	0.649262	0.999083	0.999529	0.903452	0.994743	0.946917	0.858853	0.937919	0.977648	0.818929	0.999999	0.999529	0.999999	1	1	1
X15.hydroxy.16.methoxy.9..U.200B.12..U.200B.Octadecadienoic.acid..NP.020886..isomer.1	0.247401	0.977648	0.467944	0.5341	0.957386	0.843174	0.82381	0.947285	0.988391	0.937919	0.977648	0.818929	0.999999	0.999529	0.999999	1	1	1
X15..U.200B.hydroxy..U.200B.16..U.200B.methoxy.9..U.200B.12..U.200B.Octadecadienoic.acid..NP.020886..isomer.2	0.474221	0.330543	0.62811	0.823301	0.720978	0.621259	0.997507	0.983911	0.998259	0.937919	0.637476	0.818929	0.999999	0.999529	0.999999	1	1	1
X4.Hydroxybenzaldehyde	0.20121	0.00783491	0.940125	0.757628	0.17385	0.0313183	0.661106	0.208609	0.814739	0.937919	0.211542	0.976284	0.999999	0.999529	0.845594	1	1	1
Abietic.acid	0.227105	0.0396	0.128638	0.994999	0.971539	0.101863	0.905102	0.0638978	0.22045	0.937919	0.329829	0.813913	0.999999	0.999529	0.956646	1	1	1
Abscisic.acid.methyl.ester..NP.020761..isomer.1	0.479925	0.0488636	0.250553	0.546007	0.126892	0.224009	0.765474	0.915566	0.987481	0.937919	0.329829	0.813913	0.999999	0.999529	0.956646	1	1	1
Abscisic.acid.methyl.ester..NP.020761..isomer.2	0.775823	0.654204	0.224925	0.699727	0.629666	0.951876	0.9994	0.941591	0.902954	0.967668	0.929659	0.813913	0.999999	0.999529	0.999999	1	1	1
Dihydroxyphaseic.acid.1.O.glucoside	0.194356	0.240338	0.210116	0.273998	0.315563	0.300082	0.999693	0.99992	0.999985	0.937919	0.58992	0.813913	0.999999	0.999529	0.956646	1	1	1
Feruloyl.hexose	0.287875	0.15576	0.287875	0.431343	0.295683	0.295683	0.992819	0.992819	1	0.937919	0.420552	0.813913	0.999999	0.999529	0.956646	1	1	1
Glycerol.1.myristate	0.772079	0.074346	0.434301	0.984006	0.868212	0.434166	0.679547	0.261363	0.866194	0.967668	0.401469	0.818929	0.999999	0.999529	0.999999	1	1	1
Guaiacylglycerol.4.O.vanillic.acid.ether.isomer.1	0.91095	0.977579	0.697606	0.997129	0.99374	0.999627	0.99992	0.990431	0.983713	0.967668	0.977648	0.818929	0.999999	0.999529	0.999999	1	1	1
Guaiacylglycerol.4.O.vanillic.acid.ether.isomer.2	0.81349	0.314881	0.675422	0.964896	0.734502	0.80595	0.94272	0.9729	0.999161	0.967668	0.637476	0.818929	0.999999	0.999529	0.999999	1	1	1
Hesperidine..Neohesperidin	0.900291	0.885806	0.673854	0.996505	0.97695	0.999999	0.997382	0.997107	0.979028	0.967668	0.977648	0.818929	0.999999	0.999529	0.999999	1	1	1
Hexadecanedioic.acid	0.439768	0.936945	0.430238	0.999999	0.922517	0.957947	0.926401	0.95511	0.677818	0.937919	0.977648	0.818929	0.999999	0.999529	0.999999	1	1	1
Isomaltose	0.701251	0.121578	0.358886	0.784357	0.962814	0.821087	0.502944	0.299154	0.979471	0.967668	0.420552	0.818929	0.999999	0.999529	0.999999	1	1	1
Lauryl.gallate.isomer.1	0.118033	0.467572	0.594612	0.435064	0.801805	0.360336	0.920714	0.99896	0.865865	0.937919	0.742614	0.818929	0.999999	0.999529	0.972908	1	1	1
Lauryl.gallate.isomer.2	0.91053	0.440025	0.983681	0.999894	0.939356	0.963381	0.918606	0.947504	0.999681	0.967668	0.742542	0.983681	0.999999	0.999529	0.999999	1	1	1
Loratadine	0.838515	0.73306	0.908178	0.99565	0.998435	0.999645	0.979211	0.987543	0.999905	0.967668	0.977648	0.976284	0.999999	0.999529	0.999999	1	1	1
Neohesperidin	0.879729	0.82811	0.642696	0.995864	0.96073	0.999961	0.993354	0.997944	0.970506	0.967668	0.977648	0.818929	0.999999	0.999529	0.999999	1	1	1
NP.022300	0.324965	0.152934	0.301449	0.999982	0.990273	0.318882	0.986417	0.302146	0.476731	0.937919	0.420552	0.813913	0.999999	0.999529	0.956646	1	1	1
NP.022474	0.372746	0.509787	0.28949	0.999283	0.990806	0.682192	0.998189	0.607323	0.505491	0.937919	0.76468	0.813913	0.999999	0.999529	0.999999	1	1	1
Palmitoleic.acid...Z..9.Hexadecenoic.acid..like	0.931829	0.359368	0.152287	0.685579	0.341992	0.886104	0.930201	0.97945	0.756092	0.967668	0.646862	0.813913	0.999999	0.999529	0.999999	1	1	1
Protocatechuic.acid	0.511583	0.0317672	0.511583	0.78121	0.185557	0.185557	0.657969	0.657969	1	0.937919	0.329829	0.818929	0.999999	0.999529	0.956646	1	1	1
trans.Nerolidol	0.711404	0.968598	0.603579	0.999537	0.985479	0.99092	0.99515	0.977534	0.918309	0.967668	0.977648	0.818929	0.999999	0.999529	0.999999	1	1	1

## Sheet: G
Peak	I.p	B.p	Interaction.p	I/D	DB/D	IB/I	IB/D	DB/I	DB/IB	I.fdr	B.fdr	Interaction.fdr	I/D.fdr	DB/D.fdr	IB/D.fdr	DB/I.fdr	IB/I.fdr	DB/IB.fdr
561.78173_24.277_7.74	0.165745	0.232063	0.249332	0.292893	1	1	0.344049	0.344049	1	0.94968	0.496879	0.999876	1	1	1	1	1	1
770.27907_24.262_9.79	0.165348	0.231617	0.248879	0.292109	1	1	0.343232	0.343232	1	0.94968	0.496879	0.999876	1	1	1	1	1	1
700.92970_24.392_9.27	0.426334	0.121308	0.457451	0.652343	0.363283	0.363283	0.9123	0.9123	1	0.94968	0.402114	0.999876	1	1	1	1	1	1
535.66380_23.890_7.44	0.637182	0.14664	0.729068	0.947128	0.850102	0.850102	0.548706	0.548706	1	0.96328	0.402773	0.999876	1	1	1	1	1	1
531.46534_24.187_7.46	0.107942	0.164526	0.149613	0.133995	0.195277	0.195277	1	1	1	0.94968	0.41069	0.999876	1	1	1	1	1	1
573.67693_24.052_7.81	0.49998	0.126972	0.523309	0.749091	0.412471	0.412471	0.891119	0.891119	1	0.94968	0.402114	0.999876	1	1	1	1	1	1
597.07496_24.371_8.11	0.243867	0.347968	0.871563	0.71768	0.857719	0.45103	0.998058	0.935335	0.898694	0.94968	0.607446	0.999876	1	1	1	1	1	1
604.17151_23.746_8.15	0.367167	0.495776	0.786792	0.957203	0.902146	0.998655	0.647534	0.98903	0.856529	0.94968	0.701327	0.999876	1	1	1	1	1	1
734.85568_24.183_9.46	0.659192	0.146991	0.748894	0.957523	0.841576	0.841576	0.560251	0.560251	1	0.96328	0.402773	0.999876	1	1	1	1	1	1
552.32913_24.251_7.61	0.418822	0.121013	0.450694	0.641673	0.358696	0.358696	0.914797	0.914797	1	0.94968	0.402114	0.999876	1	1	1	1	1	1
701.42258_24.408_9.26	0.857131	0.0749998	0.820951	0.984179	0.465805	0.465805	0.624908	0.624908	1	0.96328	0.307824	0.999876	1	1	1	1	1	1
485.06125_21.014_6.83	0.165016	0.231244	0.248499	0.291453	1	1	0.342547	0.342547	1	0.94968	0.496879	0.999876	1	1	1	1	1	1
624.53116_24.443_8.52	0.655281	0.146337	0.745448	0.955817	0.842282	0.842282	0.557225	0.557225	1	0.96328	0.402773	0.999876	1	1	1	1	1	1
618.24213_24.428_8.43	0.633733	0.146119	0.726004	0.945394	0.850806	0.850806	0.546114	0.546114	1	0.96328	0.402773	0.999876	1	1	1	1	1	1
728.04086_24.168_9.40	0.630811	0.146002	0.72337	0.943875	0.851838	0.851838	0.544454	0.544454	1	0.96328	0.402773	0.999876	1	1	1	1	1	1
573.49173_24.313_7.91	0.404247	0.121117	0.43761	0.620672	0.350879	0.350879	0.920382	0.920382	1	0.94968	0.402114	0.999876	1	1	1	1	1	1
624.57964_23.888_8.50	0.514275	0.126865	0.535832	0.765843	0.419822	0.419822	0.885475	0.885475	1	0.94968	0.402114	0.999876	1	1	1	1	1	1
762.26269_24.256_9.67	0.922544	0.0755228	0.8765	0.994732	0.496576	0.496576	0.596798	0.596798	1	0.96328	0.307824	0.999876	1	1	1	1	1	1
530.75278_24.189_7.50	0.544238	0.130076	0.562355	0.799418	0.441155	0.441155	0.878064	0.878064	1	0.94968	0.402773	0.999876	1	1	1	1	1	1
559.39200_29.441_7.51	0.851681	0.0754509	0.816434	0.982976	0.464701	0.464701	0.628753	0.628753	1	0.96328	0.307824	0.999876	1	1	1	1	1	1
659.80028_24.007_8.80	0.514979	0.126742	0.536434	0.766635	0.419975	0.419975	0.885043	0.885043	1	0.94968	0.402114	0.999876	1	1	1	1	1	1
543.99844_23.929_7.56	0.544757	0.129274	0.562716	0.799857	0.44001	0.44001	0.876811	0.876811	1	0.94968	0.402773	0.999876	1	1	1	1	1	1
486.04861_21.015_6.81	0.635896	0.146117	0.727964	0.946507	0.849921	0.849921	0.547196	0.547196	1	0.96328	0.402773	0.999876	1	1	1	1	1	1
592.69472_24.123_8.15	0.505162	0.84618	0.590989	0.81411	0.949768	0.940462	0.99251	0.995015	0.999987	0.94968	0.932498	0.999876	1	1	1	1	1	1
528.32045_24.201_7.63	0.64355	0.147348	0.734746	0.95025	0.848461	0.848461	0.553061	0.553061	1	0.96328	0.402773	0.999876	1	1	1	1	1	1
531.89283_24.223_7.78	0.86595	0.0746977	0.828353	0.98603	0.468836	0.468836	0.619971	0.619971	1	0.96328	0.307824	0.999876	1	1	1	1	1	1
612.09619_24.413_8.37	0.538513	0.739538	0.548587	0.810895	0.904159	0.921675	0.999183	0.99778	0.99996	0.94968	0.863354	0.999876	1	1	1	1	1	1
611.22701_24.408_8.35	0.881289	0.261947	0.415604	0.964711	0.51164	0.905628	0.736748	0.993615	0.895271	0.96328	0.531346	0.999876	1	1	1	1	1	1
546.90093_24.243_7.67	0.357619	0.510789	0.781772	0.95453	0.906649	0.997658	0.64887	0.991163	0.848206	0.94968	0.713474	0.999876	1	1	1	1	1	1
552.18743_24.248_7.68	0.810127	0.287131	0.431255	0.980871	0.548508	0.940352	0.725849	0.995262	0.879032	0.96328	0.556885	0.999876	1	1	1	1	1	1
665.06990_24.320_8.90	0.694315	0.286432	0.522057	0.998472	0.613134	0.963763	0.673226	0.9857	0.885206	0.96328	0.556853	0.999876	1	1	1	1	1	1
594.96239_23.745_8.17	0.673263	0.147496	0.761477	0.963397	0.836482	0.836482	0.568033	0.568033	1	0.96328	0.402773	0.999876	1	1	1	1	1	1
577.48554_24.326_7.99	0.79611	0.401074	0.235683	0.733493	0.467546	0.892713	0.936813	0.995298	0.878536	0.96328	0.63307	0.999876	1	1	1	1	1	1
585.84951_24.106_8.10	0.912916	0.426865	0.277157	0.83191	0.530512	0.937345	0.917523	0.997319	0.870828	0.96328	0.654175	0.999876	1	1	1	1	1	1
701.62478_24.101_9.15	0.933856	0.0772008	0.886462	0.995899	0.506649	0.506649	0.596671	0.596671	1	0.96328	0.310108	0.999876	1	1	1	1	1	1
532.46346_24.213_7.69	0.36524	0.4291	0.872852	0.93808	0.902772	0.999901	0.608372	0.963939	0.89291	0.94968	0.655487	0.999876	1	1	1	1	1	1
586.15739_23.691_8.06	0.585666	0.147857	0.68196	0.916539	0.872344	0.872344	0.524522	0.524522	1	0.950761	0.402773	0.999876	1	1	1	1	1	1
530.89728_24.184_7.43	0.938845	0.0761626	0.890477	0.996316	0.505828	0.505828	0.591364	0.591364	1	0.964201	0.307824	0.999876	1	1	1	1	1	1
643.59845_23.922_8.61	0.271648	0.408687	0.992006	0.810902	0.93596	0.519399	0.995608	0.924225	0.864866	0.94968	0.639372	0.999876	1	1	1	1	1	1
597.93718_24.377_8.20	0.807501	0.413778	0.232224	0.736841	0.472816	0.903475	0.938062	0.993751	0.87103	0.96328	0.642753	0.999876	1	1	1	1	1	1
596.86103_24.135_8.06	0.832285	0.0750042	0.79992	0.978076	0.454803	0.454803	0.636302	0.636302	1	0.96328	0.307824	0.999876	1	1	1	1	1	1
585.57053_23.649_7.94	0.531521	0.128142	0.551051	0.785431	0.431107	0.431107	0.880458	0.880458	1	0.94968	0.402126	0.999876	1	1	1	1	1	1
526.03181_24.201_7.66	0.886615	0.249022	0.427635	0.966353	0.507318	0.893972	0.728166	0.990338	0.903642	0.96328	0.518129	0.999876	1	1	1	1	1	1
710.43010_24.124_9.23	0.92021	0.076176	0.87466	0.994495	0.497467	0.497467	0.599797	0.599797	1	0.96328	0.307824	0.999876	1	1	1	1	1	1
611.70273_24.172_8.08	0.526852	0.874803	0.687614	0.869394	0.976473	0.951199	0.990792	0.998211	0.999441	0.94968	0.950881	0.999876	1	1	1	1	1	1
603.76828_23.781_8.24	0.56255	0.13134	0.578419	0.818453	0.452907	0.452907	0.87264	0.87264	1	0.94968	0.402773	0.999876	1	1	1	1	1	1
611.58369_23.780_8.21	0.573182	0.131624	0.587672	0.828962	0.45891	0.45891	0.868891	0.868891	1	0.950159	0.402773	0.999876	1	1	1	1	1	1
543.18673_24.241_7.75	0.825183	0.257052	0.457631	0.982654	0.537822	0.917969	0.708212	0.988165	0.899043	0.96328	0.526349	0.999876	1	1	1	1	1	1
603.97012_23.755_8.17	0.688752	0.274234	0.538899	0.99902	0.612373	0.959721	0.660193	0.980356	0.891637	0.96328	0.544648	0.999876	1	1	1	1	1	1
674.41166_24.020_8.89	0.757126	0.970282	0.802373	0.97699	0.99855	0.998239	0.996335	0.996863	1	0.96328	0.987596	0.999876	1	1	1	1	1	1
585.95419_23.738_8.19	0.551128	0.129411	0.568275	0.806549	0.443563	0.443563	0.874517	0.874517	1	0.94968	0.402773	0.999876	1	1	1	1	1	1
600.52578_24.151_8.29	0.777221	0.26848	0.475027	0.990489	0.562194	0.937676	0.696125	0.988203	0.891523	0.96328	0.540753	0.999876	1	1	1	1	1	1
532.65568_23.945_7.82	0.951398	0.433747	0.294429	0.861788	0.55289	0.948346	0.910233	0.998052	0.870391	0.969759	0.658756	0.999876	1	1	1	1	1	1
650.99525_23.978_8.72	0.718142	0.287356	0.496763	0.996501	0.596508	0.959864	0.684468	0.989049	0.88118	0.96328	0.556885	0.999876	1	1	1	1	1	1
557.17990_24.002_7.81	0.43177	0.429607	0.793734	0.97553	0.87328	0.999999	0.653341	0.977476	0.894161	0.94968	0.655909	0.999876	1	1	1	1	1	1
547.04504_24.255_7.79	0.236079	0.390409	0.930094	0.737905	0.903989	0.47348	0.993775	0.937903	0.87095	0.94968	0.629384	0.999876	1	1	1	1	1	1
577.35191_23.647_7.99	0.256431	0.441408	0.967411	0.80743	0.953381	0.527486	0.990121	0.930909	0.843516	0.94968	0.662565	0.999876	1	1	1	1	1	1
612.53722_24.182_8.32	0.92466	0.596062	0.922554	0.998591	0.969245	0.968579	0.988401	0.988022	1	0.96328	0.788659	0.999876	1	1	1	1	1	1
588.35583_24.111_8.05	0.521548	0.781869	0.506232	0.778562	0.900753	0.930732	0.997883	0.992894	0.999789	0.94968	0.886989	0.999876	1	1	1	1	1	1
642.18963_23.949_8.65	0.89641	0.435849	0.261182	0.811451	0.520314	0.937445	0.924429	0.995366	0.863439	0.96328	0.659681	0.999876	1	1	1	1	1	1
532.48862_23.949_7.83	0.511272	0.282856	0.703204	0.990606	0.95956	0.577631	0.995279	0.711136	0.868958	0.94968	0.554437	0.999876	1	1	1	1	1	1
547.49975_23.996_7.92	0.489536	0.239678	0.806935	0.97461	0.906856	0.522995	0.989812	0.720958	0.901181	0.94968	0.506717	0.999876	1	1	1	1	1	1
600.03107_24.143_8.24	0.818008	0.640533	0.859091	0.9891	0.966483	0.959887	0.997594	0.996169	0.999991	0.96328	0.811187	0.999876	1	1	1	1	1	1
553.19229_24.261_7.69	0.701776	0.30447	0.484593	0.996756	0.604284	0.96953	0.68949	0.992879	0.868036	0.96328	0.573025	0.999876	1	1	1	1	1	1
560.20070_24.273_7.77	0.960549	0.574718	0.994494	0.999909	0.977088	0.968747	0.983387	0.976153	0.999968	0.975909	0.772567	0.999876	1	1	1	1	1	1
484.81049_21.013_6.82	0.948157	0.437894	0.379499	0.95504	0.999626	0.897424	0.981174	0.63486	0.873537	0.968533	0.661479	0.999876	1	1	1	1	1	1
568.34396_23.649_8.05	0.944414	0.0764084	0.895261	0.996775	0.509077	0.509077	0.589589	0.589589	1	0.967441	0.307824	0.999876	1	1	1	1	1	1
558.33866_23.987_7.69	0.374838	0.720345	0.400565	0.595042	0.816919	0.84348	0.992023	0.986289	0.999947	0.94968	0.852812	0.999876	1	1	1	1	1	1
645.07030_24.258_8.63	0.814053	0.0762522	0.784751	0.972852	0.45031	0.45031	0.648413	0.648413	1	0.96328	0.307824	0.999876	1	1	1	1	1	1
594.75964_23.779_8.26	0.561778	0.260067	0.698619	0.995321	0.951156	0.585301	0.987232	0.684976	0.887771	0.94968	0.529978	0.999876	1	1	1	1	1	1
574.50352_24.311_7.87	0.920295	0.636678	0.843298	0.995832	0.962535	0.977097	0.991378	0.996677	0.999856	0.96328	0.809865	0.999876	1	1	1	1	1	1
555.04372_24.264_7.76	0.796032	0.265468	0.466793	0.987604	0.553183	0.931193	0.70227	0.988652	0.893807	0.96328	0.5362	0.999876	1	1	1	1	1	1
554.33592_24.032_8.02	0.770689	0.277824	0.468161	0.990473	0.566683	0.944398	0.700804	0.990667	0.885459	0.96328	0.548342	0.999876	1	1	1	1	1	1
486.31730_11.852_7.58	0.0620064	0.639622	0.626648	0.281592	0.899613	0.363683	0.730745	1	0.78043	0.856353	0.811117	0.999876	1	1	1	1	1	1
611.98602_23.781_8.22	0.790079	0.269864	0.469983	0.988668	0.55998	0.935147	0.703851	0.989084	0.893293	0.96328	0.54245	0.999876	1	1	1	1	1	1
559.94485_23.487_7.66	0.336072	0.427879	0.891132	0.898795	0.965631	0.58748	0.998309	0.901683	0.864356	0.94968	0.654673	0.999876	1	1	1	1	1	1
639.71920_24.255_8.50	0.813535	0.583527	0.868235	0.98914	0.955403	0.943267	0.995026	0.991437	0.999968	0.96328	0.779725	0.999876	1	1	1	1	1	1
661.16525_23.270_8.64	0.942412	0.428166	0.294638	0.8579	0.549025	0.944255	0.910714	0.998293	0.873857	0.966473	0.654761	0.999876	1	1	1	1	1	1
515.36557_29.493_7.11	0.526764	0.246578	0.757302	0.987309	0.927549	0.551912	0.987625	0.702406	0.89726	0.94968	0.516709	0.999876	1	1	1	1	1	1
594.37550_23.696_8.03	0.951884	0.6185	0.861163	0.997847	0.962191	0.978172	0.986973	0.994732	0.999805	0.969909	0.80096	0.999876	1	1	1	1	1	1
542.33444_23.349_7.46	0.281575	0.417386	0.967056	0.830503	0.945665	0.534314	0.995712	0.920749	0.861385	0.94968	0.645351	0.999876	1	1	1	1	1	1
413.29729_14.396_6.70	0.476138	0.123963	0.501983	0.719299	0.394595	0.394595	0.896496	0.896496	1	0.94968	0.402114	0.999876	1	1	1	1	1	1
665.90338_24.321_8.91	0.877173	0.517166	0.831324	0.991767	0.925337	0.939282	0.981349	0.987359	0.99997	0.96328	0.718791	0.999876	1	1	1	1	1	1
650.15889_23.178_8.51	0.587218	0.84062	0.634348	0.877888	0.959742	0.960288	0.997587	0.99749	1	0.950764	0.929604	0.999876	1	1	1	1	1	1
558.95426_23.485_7.66	0.891578	0.689738	0.885004	0.996343	0.979382	0.980911	0.996952	0.997406	1	0.96328	0.838274	0.999876	1	1	1	1	1	1
564.67483_20.259_7.73	0.339374	0.749067	0.418537	0.576231	0.841643	0.832161	0.98304	0.985692	0.999997	0.94968	0.867078	0.999876	1	1	1	1	1	1
519.31918_21.523_7.16	0.722232	0.875994	0.7819	0.968061	0.999698	0.999493	0.987322	0.989265	0.999998	0.96328	0.951543	0.999876	1	1	1	1	1	1
519.06819_21.524_7.16	0.731567	0.889262	0.789721	0.971117	0.999653	0.999429	0.989383	0.991124	0.999998	0.96328	0.958494	0.999876	1	1	1	1	1	1
372.14508_33.969_6.77	0.210979	0.507283	0.957062	0.76318	0.972114	0.523275	0.964523	0.951082	0.799591	0.94968	0.711706	0.999876	1	1	1	1	1	1
551.75614_24.254_7.65	0.0227187	0.0464886	0.0395074	0.0162326	0.0312508	0.0312508	1	1	1	0.847723	0.283303	0.999876	1	1	1	1	1	1
619.80561_24.424_8.36	0.203854	0.0475433	0.24144	0.279311	0.125065	0.125065	0.891818	0.891818	1	0.94968	0.283448	0.999876	1	1	1	1	1	1
648.39762_23.929_8.62	0.23331	0.0494823	0.27025	0.329374	0.140629	0.140629	0.876898	0.876898	1	0.94968	0.285859	0.999876	1	1	1	1	1	1
626.80528_24.445_8.54	0.481706	0.0300041	0.48891	0.700281	0.175631	0.175631	0.615226	0.615226	1	0.94968	0.257814	0.999876	1	1	1	1	1	1
550.62140_24.243_7.63	0.552202	0.0313293	0.54993	0.784017	0.201732	0.201732	0.584445	0.584445	1	0.94968	0.257814	0.999876	1	1	1	1	1	1
577.39168_29.781_8.25	0.0899114	0.795977	0.146736	0.124028	0.585548	0.571045	0.806556	0.819357	0.999995	0.919094	0.896575	0.999876	1	1	1	1	1	1
251.12793_9.756_5.18	0.230969	0.0494204	0.267996	0.325414	0.139555	0.139555	0.878331	0.878331	1	0.94968	0.285859	0.999876	1	1	1	1	1	1
674.61241_24.017_8.90	0.0909083	0.216843	0.615921	0.334839	0.598712	0.18837	0.987408	0.938389	0.84294	0.924048	0.481648	0.999876	1	1	1	1	1	1
552.75606_24.255_7.68	0.4297	0.0278321	0.442935	0.629273	0.153028	0.153028	0.631156	0.631156	1	0.94968	0.257814	0.999876	1	1	1	1	1	1
547.90395_24.247_7.69	0.16452	0.0426242	0.201616	0.21292	0.100825	0.100825	0.906641	0.906641	1	0.94968	0.271349	0.999876	1	1	1	1	1	1
762.46432_24.248_9.71	0.193179	0.0453673	0.23062	0.260891	0.11697	0.11697	0.892985	0.892985	1	0.94968	0.282362	0.999876	1	1	1	1	1	1
279.12034_5.338_5.54	0.533696	0.0307635	0.533885	0.763276	0.193964	0.193964	0.590769	0.590769	1	0.94968	0.257814	0.999876	1	1	1	1	1	1
625.52731_24.443_8.44	0.428859	0.189106	0.111221	0.327152	0.175568	0.508089	0.929486	0.997755	0.888831	0.94968	0.438479	0.999876	1	1	1	1	1	1
603.50848_24.391_8.27	0.210119	0.0495126	0.24786	0.290351	0.131071	0.131071	0.89318	0.89318	1	0.94968	0.285859	0.999876	1	1	1	1	1	1
667.90895_24.320_8.89	0.58865	0.336034	0.49967	0.803365	0.64349	0.727685	0.979582	0.995136	0.999034	0.950764	0.597859	0.999876	1	1	1	1	1	1
535.32188_24.203_7.53	0.555496	0.0309348	0.55258	0.78735	0.201236	0.201236	0.579988	0.579988	1	0.94968	0.257814	0.999876	1	1	1	1	1	1
670.21601_24.012_8.88	0.191547	0.0456183	0.229051	0.25824	0.11673	0.11673	0.894996	0.894996	1	0.94968	0.282362	0.999876	1	1	1	1	1	1
607.65142_24.416_8.40	0.546622	0.0312501	0.545133	0.777916	0.199725	0.199725	0.586957	0.586957	1	0.94968	0.257814	0.999876	1	1	1	1	1	1
643.22395_24.261_8.58	0.505848	0.241901	0.106344	0.369181	0.203197	0.629225	0.932959	0.988903	0.841117	0.94968	0.509528	0.999876	1	1	1	1	1	1
602.64578_24.393_8.33	0.489203	0.0299193	0.495342	0.709707	0.177552	0.177552	0.610228	0.610228	1	0.94968	0.257814	0.999876	1	1	1	1	1	1
790.58909_28.941_9.76	0.197144	0.0458743	0.234601	0.267639	0.119448	0.119448	0.891608	0.891608	1	0.94968	0.282362	0.999876	1	1	1	1	1	1
566.67250_24.035_7.89	0.433942	0.207633	0.0985295	0.310991	0.173019	0.53956	0.936943	0.992633	0.863645	0.94968	0.468489	0.999876	1	1	1	1	1	1
604.22489_24.392_8.26	0.417897	0.0283893	0.432843	0.612915	0.151522	0.151522	0.64284	0.64284	1	0.94968	0.257814	0.999876	1	1	1	1	1	1
561.18970_24.282_7.77	0.466513	0.211351	0.108186	0.346782	0.186512	0.564711	0.929206	0.994691	0.864998	0.94968	0.474999	0.999876	1	1	1	1	1	1
728.24062_24.172_9.40	0.192997	0.0459477	0.230532	0.260742	0.117879	0.117879	0.894928	0.894928	1	0.94968	0.282362	0.999876	1	1	1	1	1	1
582.21047_24.340_8.06	0.223469	0.124142	0.844966	0.666512	0.592912	0.219612	0.994588	0.731698	0.886934	0.94968	0.402114	0.999876	1	1	1	1	1	1
330.22547_32.387_6.78	0.183648	0.0444022	0.221042	0.244804	0.111477	0.111477	0.897198	0.897198	1	0.94968	0.279898	0.999876	1	1	1	1	1	1
540.75555_24.238_7.72	0.277687	0.0441812	0.313005	0.40525	0.167894	0.167894	0.861749	0.861749	1	0.94968	0.299958	0.999876	1	1	1	1	1	1
554.04960_24.258_7.66	0.913748	0.146593	0.276805	0.820126	0.279434	0.698521	0.676119	0.988135	0.879075	0.96328	0.402773	0.999876	1	1	1	1	1	1
622.37332_24.207_8.13	0.477739	0.0296256	0.485335	0.694985	0.173122	0.173122	0.614895	0.614895	1	0.94968	0.257814	0.999876	1	1	1	1	1	1
653.40005_24.280_8.57	0.792629	0.156034	0.210923	0.692523	0.239571	0.659638	0.74109	0.998172	0.864456	0.96328	0.407888	0.999876	1	1	1	1	1	1
489.33989_29.831_7.53	0.0950011	0.33539	0.177905	0.140872	0.353455	0.299041	0.979552	0.993357	0.999455	0.93752	0.597832	0.999876	1	1	1	1	1	1
699.63345_24.094_9.13	0.51087	0.0299426	0.513988	0.736262	0.184069	0.184069	0.597896	0.597896	1	0.94968	0.257814	0.999876	1	1	1	1	1	1
122.08483_21.536_6.41	0.546097	0.0306802	0.544452	0.777043	0.197407	0.197407	0.583365	0.583365	1	0.94968	0.257814	0.999876	1	1	1	1	1	1
290.20958_14.257_5.60	0.545626	0.0310353	0.544195	0.776713	0.19861	0.19861	0.586048	0.586048	1	0.94968	0.257814	0.999876	1	1	1	1	1	1
661.20924_23.981_8.78	0.111396	0.200883	0.630861	0.383178	0.588023	0.201471	0.996339	0.9228	0.868562	0.94968	0.457236	0.999876	1	1	1	1	1	1
452.29027_25.247_7.21	0.554113	0.0312023	0.55151	0.786008	0.201835	0.201835	0.58255	0.58255	1	0.94968	0.257814	0.999876	1	1	1	1	1	1
611.86873_24.166_7.97	0.550493	0.0308325	0.548268	0.781914	0.199321	0.199321	0.582008	0.582008	1	0.94968	0.257814	0.999876	1	1	1	1	1	1
352.30563_29.839_6.69	0.543021	0.381408	0.612101	0.834732	0.752566	0.730506	0.994293	0.991083	0.99998	0.94968	0.627278	0.999876	1	1	1	1	1	1
652.40404_23.954_8.71	0.136155	0.232019	0.733288	0.482186	0.686884	0.248657	0.996325	0.911505	0.855154	0.94968	0.496879	0.999876	1	1	1	1	1	1
219.60061_20.196_5.12	0.53814	0.0310715	0.537812	0.768439	0.196466	0.196466	0.590411	0.590411	1	0.94968	0.257814	0.999876	1	1	1	1	1	1
674.41978_24.330_8.94	0.083571	0.738103	0.132753	0.109401	0.528894	0.52466	0.822855	0.82657	1	0.899616	0.863354	0.999876	1	1	1	1	1	1
602.50442_24.389_8.23	0.51452	0.318136	0.504625	0.759146	0.631028	0.665475	0.987031	0.992816	0.999936	0.94968	0.584323	0.999876	1	1	1	1	1	1
649.39936_24.280_8.67	0.555276	0.346329	0.614023	0.84131	0.72634	0.708708	0.989104	0.985514	0.999991	0.94968	0.606397	0.999876	1	1	1	1	1	1
682.91614_24.354_9.05	0.559725	0.30789	0.517926	0.795036	0.630805	0.683301	0.978491	0.990087	0.999774	0.94968	0.57557	0.999876	1	1	1	1	1	1
577.34563_24.324_7.97	0.075219	0.629221	0.106184	0.0863238	0.418184	0.445937	0.860997	0.836257	0.999956	0.899616	0.80581	0.999876	1	1	1	1	1	1
586.64260_24.345_8.07	0.279483	0.532077	0.280407	0.407073	0.606228	0.670353	0.996906	0.988675	0.999593	0.94968	0.732729	0.999876	1	1	1	1	1	1
599.37139_24.380_8.21	0.355507	0.659291	0.395118	0.571963	0.782762	0.800571	0.994441	0.991767	0.999987	0.94968	0.820672	0.999876	1	1	1	1	1	1
127.08936_3.551_4.34	0.0391928	0.007901	0.0482096	0.0298933	0.012479	0.012479	0.86013	0.86013	1	0.847723	0.1832	0.999876	1	0.827676	0.691534	1	1	1
559.34061_24.272_7.74	0.470855	0.284621	0.463548	0.701584	0.570054	0.606417	0.985719	0.992179	0.999926	0.94968	0.556419	0.999876	1	1	1	1	1	1
581.01822_24.080_7.93	0.74851	0.145587	0.19609	0.647831	0.217625	0.6201	0.74497	0.998236	0.866417	0.96328	0.402773	0.999876	1	1	1	1	1	1
605.80663_24.395_8.28	0.82993	0.139613	0.247787	0.750997	0.250439	0.646128	0.703434	0.991127	0.885272	0.96328	0.402773	0.999876	1	1	1	1	1	1
610.37205_24.408_8.35	0.874459	0.116356	0.311055	0.824634	0.264852	0.616557	0.648906	0.96369	0.916291	0.96328	0.39557	0.999876	1	1	1	1	1	1
650.56139_24.281_8.64	0.511684	0.0496247	0.120874	0.381368	0.0766564	0.285516	0.632866	0.980101	0.875068	0.94968	0.290976	0.999876	1	1	1	1	1	1
708.43952_24.118_9.20	0.556453	0.339264	0.584983	0.828331	0.70269	0.705244	0.987231	0.987743	1	0.94968	0.600883	0.999876	1	1	1	1	1	1
681.75757_24.347_9.03	0.476791	0.342679	0.545722	0.757629	0.680424	0.659822	0.994861	0.992225	0.999986	0.94968	0.604034	0.999876	1	1	1	1	1	1
564.90499_24.281_7.72	0.603423	0.374109	0.597755	0.860283	0.738554	0.760659	0.987349	0.991472	0.99998	0.953625	0.624266	0.999876	1	1	1	1	1	1
566.91471_24.296_7.87	0.260541	0.525183	0.307415	0.409631	0.628769	0.643611	0.995058	0.993291	0.999995	0.94968	0.726041	0.999876	1	1	1	1	1	1
563.91058_24.303_7.96	0.568604	0.0446194	0.135524	0.440016	0.0868438	0.319098	0.612906	0.976192	0.871645	0.94968	0.301006	0.999876	1	1	1	1	1	1
257.16837_10.166_5.36	0.57103	0.0319066	0.566218	0.804086	0.209746	0.209746	0.57815	0.57815	1	0.949956	0.257814	0.999876	1	1	1	1	1	1
528.41048_27.679_7.73	0.915561	0.128436	0.31517	0.847526	0.283654	0.66219	0.650766	0.970748	0.905948	0.96328	0.402526	0.999876	1	1	1	1	1	1
219.17474_20.143_6.59	0.530153	0.0305055	0.530748	0.75911	0.19193	0.19193	0.590964	0.590964	1	0.94968	0.257814	0.999876	1	1	1	1	1	1
511.25395_13.630_8.16	0.194359	0.0457605	0.231844	0.262962	0.118118	0.118118	0.893331	0.893331	1	0.94968	0.282362	0.999876	1	1	1	1	1	1
616.51684_24.432_8.49	0.403639	0.183998	0.101418	0.296212	0.16176	0.48542	0.933789	0.996749	0.88505	0.94968	0.431548	0.999876	1	1	1	1	1	1
593.18687_24.125_8.04	0.51386	0.0300095	0.516582	0.739863	0.185206	0.185206	0.596667	0.596667	1	0.94968	0.257814	0.999876	1	1	1	1	1	1
633.38514_23.918_8.57	0.219756	0.0479766	0.256964	0.30613	0.13235	0.13235	0.881725	0.881725	1	0.94968	0.283448	0.999876	1	1	1	1	1	1
703.77017_24.395_9.26	0.497834	0.0300673	0.502835	0.720518	0.180646	0.180646	0.606251	0.606251	1	0.94968	0.257814	0.999876	1	1	1	1	1	1
427.31336_29.604_6.28	0.807854	0.135498	0.241892	0.732625	0.241581	0.627531	0.707033	0.990968	0.888214	0.96328	0.402773	0.999876	1	1	1	1	1	1
792.56785_29.635_10.00	0.767252	0.116271	0.252216	0.717863	0.226434	0.566045	0.695881	0.981275	0.910396	0.96328	0.39557	0.999876	1	1	1	1	1	1
608.07944_24.405_8.36	0.797562	0.121365	0.2633	0.746087	0.240029	0.59164	0.691453	0.980992	0.908539	0.96328	0.402114	0.999876	1	1	1	1	1	1
629.19387_23.857_8.41	0.133718	0.195589	0.655211	0.436766	0.596042	0.220667	0.999128	0.910296	0.88609	0.94968	0.448046	0.999876	1	1	1	1	1	1
719.43545_24.152_9.32	0.489086	0.0294713	0.495061	0.709298	0.175911	0.175911	0.607117	0.607117	1	0.94968	0.257814	0.999876	1	1	1	1	1	1
554.62405_24.262_7.71	0.488964	0.212285	0.117423	0.375657	0.197588	0.578968	0.923266	0.996429	0.869828	0.94968	0.475704	0.999876	1	1	1	1	1	1
642.39032_23.935_8.63	0.566516	0.241413	0.131	0.447689	0.232489	0.661664	0.915947	0.995592	0.854754	0.94968	0.508876	0.999876	1	1	1	1	1	1
726.04974_24.159_9.38	0.479692	0.0290499	0.486789	0.697143	0.171648	0.171648	0.609605	0.609605	1	0.94968	0.257814	0.999876	1	1	1	1	1	1
519.45647_24.195_7.76	0.461774	0.0285299	0.471088	0.673484	0.164609	0.164609	0.616521	0.616521	1	0.94968	0.257814	0.999876	1	1	1	1	1	1
607.86206_24.173_8.28	0.875527	0.138273	0.269477	0.794591	0.264488	0.664994	0.68115	0.986745	0.886936	0.96328	0.402773	0.999876	1	1	1	1	1	1
620.38818_23.822_8.31	0.47299	0.0292733	0.481091	0.688645	0.170484	0.170484	0.615198	0.615198	1	0.94968	0.257814	0.999876	1	1	1	1	1	1
684.21472_24.057_9.00	0.447564	0.0284438	0.458728	0.654345	0.160219	0.160219	0.624566	0.624566	1	0.94968	0.257814	0.999876	1	1	1	1	1	1
549.47906_24.258_7.81	0.843086	0.13337	0.264402	0.772916	0.255154	0.639464	0.689035	0.985981	0.894167	0.96328	0.402773	0.999876	1	1	1	1	1	1
556.34268_24.259_7.69	0.226009	0.484405	0.293575	0.362249	0.587805	0.578666	0.993994	0.995043	0.999999	0.94968	0.694491	0.999876	1	1	1	1	1	1
620.97527_23.890_8.49	0.131376	0.214677	0.696523	0.454105	0.645098	0.231531	0.99751	0.911113	0.865456	0.94968	0.478989	0.999876	1	1	1	1	1	1
621.71084_24.209_8.45	0.531215	0.383276	0.547948	0.796325	0.714684	0.729187	0.994445	0.996022	0.999995	0.94968	0.627819	0.999876	1	1	1	1	1	1
559.48026_24.281_7.82	0.538329	0.349444	0.638583	0.842907	0.743322	0.699328	0.99174	0.982928	0.999852	0.94968	0.607692	0.999876	1	1	1	1	1	1
573.51527_24.045_7.88	0.426335	0.209557	0.095576	0.301656	0.170676	0.537378	0.940258	0.991281	0.861735	0.94968	0.47171	0.999876	1	1	1	1	1	1
550.00239_23.997_7.89	0.281925	0.507615	0.339727	0.455349	0.647274	0.649703	0.997443	0.997269	1	0.94968	0.711706	0.999876	1	1	1	1	1	1
572.77991_24.309_7.87	0.834475	0.121823	0.275064	0.776657	0.248476	0.610888	0.674561	0.978147	0.905169	0.96328	0.402114	0.999876	1	1	1	1	1	1
577.14908_23.696_8.12	0.898372	0.143014	0.274483	0.81053	0.2736	0.684722	0.67795	0.987404	0.88276	0.96328	0.402773	0.999876	1	1	1	1	1	1
449.32648_29.576_6.49	0.527036	0.355747	0.577651	0.807985	0.711749	0.701838	0.992498	0.990972	0.999998	0.94968	0.613452	0.999876	1	1	1	1	1	1
688.92799_24.363_9.11	0.575667	0.38703	0.571454	0.834245	0.732347	0.756787	0.991467	0.994873	0.999973	0.950159	0.627853	0.999876	1	1	1	1	1	1
603.56438_23.820_8.34	0.867666	0.138543	0.266217	0.787795	0.262485	0.661774	0.685178	0.987482	0.887082	0.96328	0.402773	0.999876	1	1	1	1	1	1
660.73805_24.300_8.68	0.281444	0.187303	0.322167	0.428562	0.359703	0.365468	0.990414	0.991524	0.999999	0.94968	0.436499	0.999876	1	1	1	1	1	1
543.62025_24.222_7.56	0.513997	0.329918	0.544517	0.781598	0.668622	0.673069	0.989889	0.990635	1	0.94968	0.595835	0.999876	1	1	1	1	1	1
619.87394_24.200_8.34	0.492877	0.391211	0.564606	0.780685	0.731237	0.710123	0.997485	0.995649	0.999984	0.94968	0.629384	0.999876	1	1	1	1	1	1
562.34349_24.029_7.90	0.28638	0.503581	0.34232	0.461652	0.646904	0.650962	0.997871	0.997608	1	0.94968	0.707843	0.999876	1	1	1	1	1	1
581.34808_24.089_8.06	0.525525	0.345668	0.475467	0.750302	0.634629	0.699729	0.989322	0.997292	0.999564	0.94968	0.606301	0.999876	1	1	1	1	1	1
607.20250_24.166_8.32	0.429508	0.41194	0.532181	0.717485	0.725961	0.685529	0.999709	0.998335	0.999889	0.94968	0.641042	0.999876	1	1	1	1	1	1
679.75414_13.745_9.36	0.515472	0.0317407	0.518655	0.742723	0.192001	0.192001	0.607594	0.607594	1	0.94968	0.257814	0.999876	1	1	1	1	1	1
612.37007_23.857_8.42	0.59006	0.373855	0.608363	0.858102	0.744682	0.752287	0.98906	0.990455	0.999999	0.950764	0.624266	0.999876	1	1	1	1	1	1
220.58804_1.638_3.57	0.887743	0.15475	0.250624	0.785572	0.269147	0.701952	0.697642	0.994195	0.866429	0.96328	0.407888	0.999876	1	1	1	1	1	1
450.19351_30.693_5.39	0.0246592	0.509113	0.0424404	0.023022	0.236168	0.220362	0.74088	0.766501	0.999971	0.847723	0.712137	0.999876	1	1	1	1	1	1
335.25565_34.167_6.56	0.0806664	0.0637573	0.0450752	1	0.0495718	1	0.0400225	1	0.0653083	0.899616	0.306288	0.999876	1	1	1	0.864096	1	1
558.01155_23.981_7.67	0.0459493	0.431526	0.414066	0.752832	0.656371	0.804571	0.183073	1	0.245759	0.847723	0.657432	0.999876	1	1	1	1	1	1
341.23036_31.112_6.31	0.0810939	0.0641269	0.0454112	1	0.0499925	1	0.0403797	1	0.0658242	0.899616	0.306348	0.999876	1	1	1	0.864096	1	1
149.02374_19.992_3.54	0.0434851	0.381588	0.363685	0.778856	0.576755	0.826184	0.156674	1	0.215032	0.847723	0.627278	0.999876	1	1	1	1	1	1
319.09386_26.381_6.08	0.0418481	0.33044	0.312434	0.810855	0.489312	0.852436	0.132618	1	0.186268	0.847723	0.595835	0.999876	1	1	1	1	1	1
152.01691_14.701_3.73	0.0423477	0.354879	0.336874	0.794202	0.531711	0.838818	0.143468	1	0.199339	0.847723	0.613402	0.999876	1	1	1	1	1	1
202.18058_13.617_4.72	0.0436667	0.385338	0.367458	0.77683	0.582955	0.824511	0.1586	1	0.217302	0.847723	0.627853	0.999876	1	1	1	1	1	1
212.02011_26.016_4.36	0.0429847	0.369589	0.351628	0.785728	0.556705	0.831852	0.150713	1	0.207977	0.847723	0.621136	0.999876	1	1	1	1	1	1
212.02012_28.967_4.36	0.0427449	0.364611	0.346632	0.78848	0.548296	0.834118	0.148205	1	0.204994	0.847723	0.619319	0.999876	1	1	1	1	1	1
212.02018_24.157_4.35	0.0403769	0.301919	0.284034	0.827393	0.438758	0.865864	0.118863	1	0.169446	0.847723	0.571762	0.999876	1	1	1	1	1	1
212.02022_27.719_4.36	0.0419234	0.344384	0.326368	0.800468	0.513628	0.843954	0.138424	1	0.193283	0.847723	0.605539	0.999876	1	1	1	1	1	1
225.98174_27.220_4.34	0.0427473	0.363371	0.345388	0.789417	0.546194	0.834889	0.147693	1	0.204385	0.847723	0.618707	0.999876	1	1	1	1	1	1
346.92155_12.464_5.65	0.0420766	0.348555	0.330542	0.797906	0.520838	0.841856	0.140395	1	0.195654	0.847723	0.607446	0.999876	1	1	1	1	1	1
427.15442_22.327_6.63	0.0438091	0.373893	0.355951	0.785824	0.563934	0.831931	0.154015	1	0.21189	0.847723	0.624266	0.999876	1	1	1	1	1	1
475.94406_18.375_6.42	0.0411404	0.324339	0.306348	0.812788	0.478583	0.85401	0.128993	1	0.181863	0.847723	0.589933	0.999876	1	1	1	1	1	1
379.32168_10.882_6.59	0.080738	0.0638191	0.0451314	1	0.049642	1	0.0400821	1	0.0653945	0.899616	0.306288	0.999876	1	1	1	0.864096	1	1
323.22041_33.151_6.48	0.0810779	0.064113	0.0453986	1	0.0499766	1	0.0403663	1	0.0658048	0.899616	0.306348	0.999876	1	1	1	0.864096	1	1
253.22748_13.480_5.78	0.00571934	0.00363659	0.00275673	1	0.000874844	1	0.000604705	1	0.0014261	0.549935	0.113315	0.999876	1	0.166337	1	0.163659	1	1
321.89447_10.749_4.73	0.0806912	0.0637787	0.0550946	1	0.049596	1	0.0400431	1	0.0653381	0.899616	0.306288	0.999876	1	1	1	0.864096	1	1
374.26866_26.242_6.86	0.0538907	0.390517	0.372671	0.773941	0.591462	0.822121	0.161223	1	0.220385	0.847723	0.629384	0.999876	1	1	1	1	1	1
182.96226_34.542_3.93	0.430159	0.335342	0.0564403	0.869607	0.173795	1	0.434855	0.889202	0.208098	0.94968	0.597832	0.999876	1	1	1	1	1	1
358.26490_29.226_6.52	0.301475	0.160267	0.987553	0.874727	0.731714	0.986451	0.319729	0.721646	0.90886	0.94968	0.407888	0.999876	1	1	1	1	1	1
304.89059_13.970_4.46	0.08069	0.0637777	0.0450937	1	0.0495949	1	0.0400421	1	0.0653367	0.899616	0.306288	0.999876	1	1	1	0.864096	1	1
203.14380_25.371_4.80	0.267084	0.583261	0.379273	0.989794	0.993278	0.595707	0.942336	0.733724	0.48769	0.94968	0.779725	0.999876	1	1	1	1	1	1
326.07040_29.303_5.70	0.4483	0.0342331	0.444057	1	0.173278	0.700413	0.150339	0.675491	0.732199	0.94968	0.257814	0.999876	1	1	1	1	1	1
151.12326_2.744_3.94	0.148507	0.0968402	0.00916075	0.830179	0.0191411	1	0.0677809	0.854802	0.026813	0.94968	0.357757	0.999876	1	1	1	1	1	1
208.10846_26.411_3.98	0.0433479	0.37757	0.359646	0.781267	0.570078	0.828175	0.154726	1	0.212731	0.847723	0.625701	0.999876	1	1	1	1	1	1
407.27739_32.281_6.84	0.504675	0.0355803	0.509196	1	0.201379	0.665677	0.176442	0.639023	0.809942	0.94968	0.257814	0.999876	1	1	1	1	1	1
399.27424_32.603_7.35	0.45814	0.0343984	0.455406	1	0.177873	0.693747	0.154586	0.668475	0.746815	0.94968	0.257814	0.999876	1	1	1	1	1	1
345.11333_26.416_6.53	0.476749	0.374661	0.0601429	0.853423	0.197899	1	0.500236	0.875128	0.234353	0.94968	0.624266	0.999876	1	1	1	1	1	1
167.99387_15.585_3.81	0.00842534	0.0879683	0.0772987	0.749599	0.0793407	0.801869	0.0107448	1	0.0201279	0.549935	0.334961	0.999876	1	1	1	0.509206	1	1
180.04816_16.047_4.02	0.0103674	0.120679	0.107878	0.721352	0.125534	0.778104	0.0166168	1	0.0298155	0.549935	0.402114	0.999876	1	1	1	0.592387	1	1
210.14928_15.814_4.78	0.00763996	0.0755885	0.0658845	0.762346	0.0635798	0.8125	0.00875588	1	0.0167231	0.549935	0.307824	0.999876	1	1	1	0.509206	1	1
212.02011_16.046_4.30	0.0105146	0.118866	0.106169	0.727883	0.122822	0.783625	0.0165401	1	0.029692	0.549935	0.400715	0.999876	1	1	1	0.592387	1	1
212.02021_20.587_4.36	0.0103781	0.125606	0.112528	0.712126	0.132978	0.77028	0.0172706	1	0.0308671	0.549935	0.402114	0.999876	1	1	1	0.600681	1	1
223.11562_22.683_4.84	0.00885968	0.0969718	0.085659	0.738402	0.0914409	0.792483	0.0121629	1	0.0225129	0.549935	0.35778	0.999876	1	1	1	0.509206	1	1
239.06784_10.495_4.86	0.00981091	0.11132	0.0990733	0.728428	0.111716	0.784084	0.01483	1	0.0269168	0.549935	0.3839	0.999876	1	1	1	0.571557	1	1
307.99160_11.335_5.33	0.00895792	0.0994679	0.0879848	0.734984	0.0948836	0.789609	0.0125466	1	0.0231526	0.549935	0.35988	0.999876	1	1	1	0.509206	1	1
449.21075_17.365_7.29	0.0079158	0.0797235	0.0696859	0.758174	0.068725	0.809027	0.00941334	1	0.0178571	0.549935	0.313835	0.999876	1	1	1	0.509206	1	1
309.25387_22.959_6.55	0.00558001	0.00354182	0.00268216	1	0.000844446	1	0.000583112	1	0.00137848	0.549935	0.113315	0.999876	1	0.166337	1	0.163659	1	1
209.12874_7.210_4.65	0.043285	0.376131	0.3582	0.782078	0.567677	0.828844	0.154005	1	0.211878	0.847723	0.624266	0.999876	1	1	1	1	1	1
219.17467_21.066_6.16	0.060434	0.508718	0.49249	0.718011	0.764679	0.775275	0.228168	1	0.296554	0.855409	0.712137	0.999876	1	1	1	1	1	1
149.02377_17.811_3.53	0.245463	0.170952	0.90993	0.85639	0.70648	0.996847	0.282822	0.775436	0.83907	0.94968	0.415294	0.999876	1	1	1	1	1	1
234.94616_1.166_4.48	0.478414	0.0349591	0.478762	1	0.188116	0.681627	0.164084	0.65574	0.775478	0.94968	0.257814	0.999876	1	1	1	1	1	1
340.28481_28.325_6.49	0.009026	0.100292	0.0887538	0.734705	0.096029	0.789374	0.0127087	1	0.0234222	0.549935	0.360666	0.999876	1	1	1	0.509206	1	1
211.18079_20.607_5.01	0.00857135	0.0915763	0.0806433	0.744287	0.0841284	0.797422	0.0112798	1	0.0210315	0.549935	0.343702	0.999876	1	1	1	0.509206	1	1
136.02197_11.336_3.48	0.00897997	0.099294	0.0878226	0.735894	0.0946426	0.790375	0.0125474	1	0.023154	0.549935	0.35988	0.999876	1	1	1	0.509206	1	1
168.13862_13.559_4.52	0.00830815	0.0864499	0.0758935	0.750526	0.0773512	0.802644	0.0104741	1	0.0196689	0.549935	0.330503	0.999876	1	1	1	0.509206	1	1
180.13870_17.516_4.40	0.00823779	0.0827696	0.0724935	0.758236	0.072593	0.809078	0.0100091	1	0.0188772	0.549935	0.320732	0.999876	1	1	1	0.509206	1	1
194.15440_20.896_4.61	0.00847251	0.0895977	0.0788082	0.746714	0.0814924	0.799455	0.0109686	1	0.0205065	0.549935	0.338903	0.999876	1	1	1	0.509206	1	1
196.13355_16.969_4.78	0.00790997	0.0797792	0.0697372	0.757874	0.0687952	0.808777	0.00941453	1	0.0178591	0.549935	0.313835	0.999876	1	1	1	0.509206	1	1
207.98860_19.589_4.15	0.00819084	0.0851342	0.0746771	0.750949	0.0756397	0.802998	0.0102284	1	0.0192511	0.549935	0.327228	0.999876	1	1	1	0.509206	1	1
212.02021_26.549_4.36	0.0104853	0.121481	0.108634	0.722204	0.126738	0.778826	0.0168512	1	0.0301931	0.549935	0.402114	0.999876	1	1	1	0.593329	1	1
212.09478_20.166_4.73	0.00785639	0.076196	0.0664422	0.766301	0.0643279	0.815787	0.00899001	1	0.0171279	0.549935	0.307824	0.999876	1	1	1	0.509206	1	1
212.30282_18.325_4.37	0.00997845	0.1191	0.106389	0.716293	0.123172	0.773818	0.0159867	1	0.0287977	0.549935	0.400859	0.999876	1	1	1	0.58504	1	1
212.81366_18.327_4.37	0.00998056	0.11919	0.106474	0.716161	0.123305	0.773706	0.0160004	1	0.0288198	0.549935	0.400859	0.999876	1	1	1	0.58504	1	1
226.03570_23.168_4.60	0.00991583	0.115492	0.102993	0.722151	0.117822	0.778781	0.0154633	1	0.0279487	0.549935	0.394535	0.999876	1	1	1	0.58504	1	1
239.21196_11.300_5.65	0.0077208	0.0761481	0.0663982	0.762912	0.0642688	0.812971	0.00887814	1	0.0169346	0.549935	0.307824	0.999876	1	1	1	0.509206	1	1
242.03060_15.462_4.75	0.008327	0.0868148	0.0762311	0.750071	0.077828	0.802264	0.0105308	1	0.0197652	0.549935	0.331454	0.999876	1	1	1	0.509206	1	1
242.06368_24.057_5.00	0.00859401	0.0910319	0.0801382	0.746155	0.0834007	0.798987	0.0112386	1	0.0209622	0.549935	0.342963	0.999876	1	1	1	0.509206	1	1
254.17539_6.622_5.24	0.00827919	0.0833299	0.0730106	0.757803	0.0733114	0.808718	0.0101053	1	0.0190413	0.549935	0.321592	0.999876	1	1	1	0.509206	1	1
256.19518_20.344_4.85	0.00999387	0.117397	0.104786	0.719999	0.120639	0.776959	0.0157879	1	0.0284756	0.549935	0.397425	0.999876	1	1	1	0.58504	1	1
282.20659_27.009_5.76	0.00861253	0.0914794	0.0805533	0.745516	0.0839987	0.798451	0.011306	1	0.0210756	0.549935	0.343702	0.999876	1	1	1	0.509206	1	1
296.93926_12.461_4.94	0.00833492	0.0864321	0.075877	0.751234	0.0773279	0.803236	0.0104953	1	0.0197049	0.549935	0.330503	0.999876	1	1	1	0.509206	1	1
310.00062_15.586_5.49	0.00899185	0.0990955	0.0876375	0.736623	0.0943676	0.790988	0.0125356	1	0.0231343	0.549935	0.35988	0.999876	1	1	1	0.509206	1	1
473.63272_18.660_6.77	0.0806857	0.0637739	0.0450903	1	0.0495907	1	0.0400385	1	0.0653315	0.899616	0.306288	0.999876	1	1	1	0.864096	1	1
284.20697_34.784_5.33	0.0434202	0.371945	0.353995	0.78572	0.460668	0.831846	0.152489	1	0.210083	0.847723	0.624266	0.999876	1	1	1	1	1	1
242.88560_20.794_4.37	0.22371	0.702077	0.225472	0.999225	0.647236	0.900014	0.549017	0.931855	0.323197	0.94968	0.840874	0.999876	1	1	1	1	1	1
178.12311_28.312_4.44	0.239835	0.773906	0.255357	0.998753	0.720817	0.887116	0.614389	0.927558	0.364904	0.94968	0.88111	0.999876	1	1	1	1	1	1
394.29333_34.771_7.10	0.916587	0.165546	0.299049	0.907257	0.317619	0.806757	0.619122	0.989795	0.832931	0.96328	0.41069	0.999876	1	1	1	1	1	1
213.07375_7.660_4.57	0.318838	0.608178	0.320343	0.999145	0.980974	0.655236	0.953988	0.700743	0.480678	0.94968	0.795653	0.999876	1	1	1	1	1	1
213.15540_18.478_4.78	0.0757493	0.0495141	0.435893	0.82796	0.211228	0.997957	0.044826	0.760233	0.317896	0.899616	0.285859	0.999876	1	1	1	0.913169	1	1
178.12296_15.727_4.35	0.0439806	0.392195	0.37436	0.773079	0.594204	0.821407	0.162108	1	0.221424	0.847723	0.630163	0.999876	1	1	1	1	1	1
269.17279_24.510_5.41	0.687717	0.36847	0.200268	0.627792	0.403571	0.832308	0.949774	0.993517	0.885909	0.96328	0.620601	0.999876	1	1	1	1	1	1
263.13043_12.578_5.31	0.887841	0.711587	0.426089	0.971265	0.829489	0.999513	0.963448	0.990627	0.894079	0.96328	0.846607	0.999876	1	1	1	1	1	1
165.13896_4.030_4.11	0.0870507	0.373087	0.0763329	0.999357	0.228417	0.878788	0.168241	0.910976	0.0827759	0.899616	0.624266	0.999876	1	1	1	1	1	1
213.19648_24.165_5.23	0.00863744	0.0920194	0.0810546	0.744811	0.0847221	0.797861	0.0113898	1	0.0212167	0.549935	0.344861	0.999876	1	1	1	0.509206	1	1
214.08996_10.766_4.60	0.00907091	0.101168	0.0895706	0.733778	0.0972491	0.788594	0.0128551	1	0.0236655	0.549935	0.361114	0.999876	1	1	1	0.509206	1	1
731.16701_30.678_9.01	0.235905	0.745418	0.241123	0.999144	0.689827	0.89395	0.59109	0.927976	0.348191	0.94968	0.867078	0.999876	1	1	1	1	1	1
304.89066_11.572_4.46	0.476264	0.0350811	0.476198	1	0.187551	0.684038	0.163559	0.658271	0.772425	0.94968	0.257814	0.999876	1	1	1	1	1	1
504.82469_31.002_6.90	0.46652	0.0346824	0.465025	1	0.182232	0.689033	0.158623	0.663519	0.75885	0.94968	0.257814	0.999876	1	1	1	1	1	1
266.98275_2.816_5.07	0.0870596	0.0402565	0.429029	0.860587	0.18464	0.98956	0.0430224	0.721246	0.33796	0.899616	0.262127	0.999876	1	1	1	0.897858	1	1
137.02369_2.817_3.44	0.0824028	0.0328867	0.375994	0.879976	0.14542	0.984221	0.0350567	0.717607	0.296605	0.899616	0.257814	0.999876	1	1	1	0.861911	1	1
155.03429_2.815_3.87	0.0786804	0.0370104	0.386573	0.865141	0.160017	0.990808	0.0368886	0.734443	0.295431	0.899616	0.257814	0.999876	1	1	1	0.864096	1	1
294.97772_2.817_5.28	0.0851734	0.0389614	0.4174	0.862827	0.176703	0.989332	0.0411624	0.722598	0.327126	0.899616	0.257814	0.999876	1	1	1	0.869595	1	1
455.18909_20.952_6.67	0.470321	0.369109	0.0394399	0.855132	0.194081	1	0.491032	0.876617	0.230218	0.94968	0.620695	0.999876	1	1	1	1	1	1
290.00866_7.660_4.83	0.317102	0.600807	0.325968	0.998908	0.983258	0.649605	0.955571	0.701128	0.48435	0.94968	0.790161	0.999876	1	1	1	1	1	1
406.51638_35.143_7.51	0.460823	0.0344671	0.458494	1	0.1792	0.692092	0.155815	0.666735	0.750714	0.94968	0.257814	0.999876	1	1	1	1	1	1
360.25089_23.871_6.63	0.00795796	0.0807748	0.0706542	0.756438	0.0700526	0.80758	0.00956042	1	0.0181096	0.549935	0.317142	0.999876	1	1	1	0.509206	1	1
397.26931_34.393_7.34	0.113556	0.383471	0.739225	0.48117	0.98088	0.963731	0.325984	0.814073	0.84962	0.94968	0.627819	0.999876	1	1	1	1	1	1
289.21634_22.799_5.78	0.00551713	0.00349912	0.00264858	1	0.000830848	1	0.00057346	1	0.00135715	0.549935	0.113315	0.999876	1	0.166337	1	0.163659	1	1
445.93273_26.588_6.02	0.0425926	0.361226	0.343237	0.790405	0.542549	0.8357	0.146527	1	0.202994	0.847723	0.618006	0.999876	1	1	1	1	1	1
294.26403_34.768_5.85	0.913792	0.689844	0.427483	0.966427	0.820171	0.99864	0.964176	0.992638	0.903393	0.96328	0.838274	0.999876	1	1	1	1	1	1
507.32911_35.150_7.94	0.0437362	0.387045	0.369176	0.775859	0.585766	0.823707	0.159455	1	0.218307	0.847723	0.627853	0.999876	1	1	1	1	1	1
322.23814_25.297_6.04	0.234381	0.785426	0.267653	0.997767	0.739612	0.879406	0.616894	0.930938	0.371617	0.94968	0.88855	0.999876	1	1	1	1	1	1
328.23313_35.476_5.84	0.114968	0.00424336	0.0961078	1	0.0121804	0.66608	0.00921638	0.639446	0.133417	0.94968	0.118648	0.999876	1	0.827676	1	0.509206	1	1
600.70629_24.133_8.11	0.304957	0.670887	0.937074	0.879874	0.983623	0.974172	0.714752	0.993816	0.880063	0.94968	0.827225	0.999876	1	1	1	1	1	1
194.00964_20.554_4.08	0.0459244	0.0458099	0.305625	0.811549	0.148542	1	0.0275129	0.837694	0.180605	0.847723	0.282362	0.999876	1	1	1	0.761906	1	1
270.00794_15.585_4.99	0.0403585	0.0453658	0.324712	0.816296	0.155425	0.999972	0.0295453	0.821669	0.200208	0.847723	0.282362	0.999876	1	1	1	0.766029	1	1
282.20666_26.890_5.76	0.0458353	0.0447039	0.302978	0.813354	0.145264	1	0.0269659	0.835283	0.179178	0.847723	0.280827	0.999876	1	1	1	0.761906	1	1
283.05696_26.319_5.23	0.0653468	0.0604682	0.429922	0.79899	0.234163	0.999969	0.0460746	0.804815	0.290247	0.879099	0.304177	0.999876	1	1	1	0.925386	1	1
383.20145_33.973_7.18	0.550098	0.874402	0.16025	0.959771	0.777232	0.912687	0.950596	0.671409	0.448404	0.94968	0.950881	0.999876	1	1	1	1	1	1
479.64260_18.661_6.72	0.477317	0.375051	0.0600057	0.852743	0.197788	1	0.500829	0.874535	0.234233	0.94968	0.624266	0.999876	1	1	1	1	1	1
304.89066_9.744_4.46	0.436532	0.0339348	0.430563	1	0.167559	0.707841	0.145065	0.683319	0.714243	0.94968	0.257814	0.999876	1	1	1	1	1	1
155.08197_1.354_3.93	0.00797919	0.0814642	0.0712896	0.755148	0.0409274	0.806504	0.00965197	1	0.0182665	0.549935	0.317542	0.999876	1	1	1	0.509206	1	1
280.19101_19.440_5.58	0.0445666	0.404822	0.387087	0.766287	0.614615	0.815775	0.168652	1	0.229074	0.847723	0.636819	0.999876	1	1	1	1	1	1
263.98110_1.458_5.03	0.0806744	0.0637642	0.0450815	1	0.0495796	1	0.0400291	1	0.065318	0.899616	0.306288	0.999876	1	1	1	0.864096	1	1
234.94509_1.835_4.44	0.0439043	0.389211	0.371356	0.77495	0.589323	0.822956	0.160692	1	0.219761	0.847723	0.629269	0.999876	1	1	1	1	1	1
370.29533_27.854_6.81	0.00848392	0.0904786	0.0796249	0.744831	0.0826629	0.797878	0.0110775	1	0.0206904	0.549935	0.341329	0.999876	1	1	1	0.509206	1	1
180.13867_17.028_4.47	0.041098	0.0428792	0.320296	0.82281	0.148438	0.999883	0.028638	0.814412	0.199745	0.847723	0.272364	0.999876	1	1	1	0.762295	1	1
253.04674_19.587_4.93	0.0484904	0.0426149	0.308924	0.820616	0.143398	0.999955	0.0272657	0.821974	0.188192	0.847723	0.271349	0.999876	1	1	1	0.761906	1	1
383.31343_35.678_7.23	0.435934	0.340069	0.0366602	0.866949	0.176209	1	0.442706	0.886895	0.210744	0.94968	0.601288	0.999876	1	1	1	1	1	1
244.29777_3.236_5.29	0.576185	0.844247	0.164249	0.955228	0.797181	0.912779	0.964118	0.660933	0.468364	0.950159	0.930727	0.999876	1	1	1	1	1	1
215.25653_26.361_5.72	0.0448721	0.409864	0.392174	0.763891	0.622648	0.813785	0.171429	1	0.232305	0.847723	0.640188	0.999876	1	1	1	1	1	1
285.29025_25.498_6.47	0.234857	0.17016	0.885879	0.855611	0.692441	0.997686	0.271865	0.785757	0.818607	0.94968	0.414428	0.999876	1	1	1	1	1	1
356.26188_27.464_6.73	0.55893	0.831053	0.177526	0.96674	0.820583	0.903105	0.964054	0.673045	0.478723	0.94968	0.920809	0.999876	1	1	1	1	1	1
263.13646_34.615_4.93	0.907367	0.72269	0.0392509	0.523207	0.278079	1	0.91517	0.573665	0.319495	0.96328	0.854878	0.999876	1	1	1	1	1	1
257.22252_17.073_5.42	0.00873689	0.0952838	0.084088	0.739425	0.089134	0.793342	0.0118535	1	0.0219952	0.549935	0.35338	0.999876	1	1	1	0.509206	1	1
346.23526_22.801_6.47	0.00868626	0.0946234	0.0834738	0.739769	0.0882361	0.793631	0.0117309	1	0.0217898	0.549935	0.352511	0.999876	1	1	1	0.509206	1	1
333.27790_33.832_6.61	0.232487	0.172829	0.88602	0.853142	0.696355	0.998086	0.272627	0.789306	0.816403	0.94968	0.416933	0.999876	1	1	1	1	1	1
196.13342_12.289_4.59	0.0244613	0.0434072	0.335633	0.824738	0.155651	0.999735	0.0305232	0.80513	0.215165	0.847723	0.274495	0.999876	1	1	1	0.784253	1	1
335.27943_29.618_6.55	0.251448	0.801752	0.263557	0.998956	0.743823	0.885605	0.644349	0.923669	0.38234	0.94968	0.899286	0.999876	1	1	1	1	1	1
239.14898_11.557_4.80	0.598541	0.450991	0.593479	0.999993	0.789655	0.998781	0.756452	0.997852	0.878954	0.953232	0.66905	0.999876	1	1	1	1	1	1
578.69407_24.069_7.85	0.118742	0.796855	0.585641	0.803903	0.996086	0.536992	0.709545	0.937998	0.458321	0.94968	0.896854	0.999876	1	1	1	1	1	1
379.08388_30.713_5.37	0.10049	0.441865	0.716145	0.438624	0.991954	0.931382	0.339369	0.841252	0.838138	0.94968	0.662565	0.999876	1	1	1	1	1	1
322.27412_28.325_6.38	0.0626855	0.289199	0.0606996	0.998202	0.161741	0.877822	0.106195	0.925878	0.0567043	0.856353	0.558425	0.999876	1	1	1	1	1	1
121.02881_30.972_3.26	0.579471	0.408484	0.595503	0.999958	0.76244	0.997672	0.715712	0.995129	0.873056	0.950159	0.639372	0.999876	1	1	1	1	1	1
345.13333_7.310_6.61	0.802302	0.757289	0.447071	0.987635	0.861924	1	0.956303	0.988777	0.875488	0.96328	0.871585	0.999876	1	1	1	1	1	1
273.09483_4.840_6.52	0.0388856	0.151447	0.844344	0.442078	0.640904	0.964188	0.0728001	0.778563	0.419367	0.847723	0.40729	0.999876	1	1	1	1	1	1
292.25658_29.144_6.08	0.324364	0.68512	0.96875	0.88226	0.988693	0.977266	0.743088	0.992797	0.902966	0.94968	0.837765	0.999876	1	1	1	1	1	1
481.01034_30.769_7.11	0.874981	0.660388	0.457779	0.979171	0.825012	0.998639	0.95088	0.996792	0.906836	0.96328	0.820827	0.999876	1	1	1	1	1	1
331.88516_14.065_5.25	0.748068	0.38221	0.162298	0.615399	0.365785	0.871703	0.933311	0.981992	0.816395	0.96328	0.627402	0.999876	1	1	1	1	1	1
275.05572_30.803_5.47	0.907932	0.606992	0.39046	0.956896	0.750866	0.995574	0.940035	0.995253	0.882418	0.96328	0.795225	0.999876	1	1	1	1	1	1
298.24377_32.610_6.25	0.708201	0.362142	0.192298	0.630465	0.38963	0.838179	0.940931	0.992873	0.870303	0.96328	0.618707	0.999876	1	1	1	1	1	1
432.17968_26.415_7.75	0.561782	0.399873	0.579397	0.999947	0.746702	0.997983	0.696354	0.995434	0.857609	0.94968	0.63307	0.999876	1	1	1	1	1	1
149.02378_36.570_3.54	0.555303	0.395307	0.621179	0.999628	0.767933	0.99783	0.693771	0.991953	0.875377	0.94968	0.630766	0.999876	1	1	1	1	1	1
443.22120_34.261_7.63	0.233759	0.172846	0.889492	0.853042	0.698248	0.997995	0.273916	0.787701	0.819238	0.94968	0.416933	0.999876	1	1	1	1	1	1
171.11327_2.541_4.27	0.513871	0.908142	0.159421	0.968286	0.759701	0.909834	0.930327	0.688449	0.427701	0.94968	0.967509	0.999876	1	1	1	1	1	1
333.24009_32.255_6.62	0.542597	0.406273	0.625535	0.999361	0.778085	0.998686	0.69437	0.992802	0.871721	0.94968	0.637748	0.999876	1	1	1	1	1	1
586.03129_24.087_7.98	0.299583	0.727093	0.90576	0.814367	0.99848	0.964776	0.75559	0.985968	0.931613	0.94968	0.857154	0.999876	1	1	1	1	1	1
354.30016_29.567_6.66	0.500003	0.917804	0.161038	0.972219	0.757401	0.907681	0.922698	0.696103	0.422571	0.94968	0.971993	0.999876	1	1	1	1	1	1
251.04721_33.995_5.01	0.804997	0.584812	0.43903	0.98527	0.773527	0.998216	0.905443	0.99877	0.874926	0.96328	0.780249	0.999876	1	1	1	1	1	1
315.10527_10.096_5.50	0.106593	0.460549	0.670471	0.429515	0.99646	0.932755	0.365756	0.831482	0.869395	0.94968	0.677404	0.999876	1	1	1	1	1	1
609.33983_31.661_8.37	0.249712	0.178322	0.934078	0.85075	0.729482	0.997222	0.295525	0.773953	0.85303	0.94968	0.423924	0.999876	1	1	1	1	1	1
641.15900_9.539_7.91	0.681417	0.867754	0.732072	0.999662	0.999103	0.971045	0.995539	0.98288	0.9473	0.96328	0.946037	0.999876	1	1	1	1	1	1
219.17475_31.908_5.11	0.196979	0.71029	0.0746821	0.995266	0.385918	0.851533	0.468678	0.720592	0.137171	0.94968	0.84653	0.999876	1	1	1	1	1	1
215.17339_4.076_5.01	0.904964	0.680651	0.495002	0.981031	0.855614	0.998335	0.964009	0.997743	0.931139	0.96328	0.835264	0.999876	1	1	1	1	1	1
270.15493_3.595_5.28	0.0813558	0.0643533	0.0556172	1	0.0402508	1	0.0405992	1	0.0661407	0.899616	0.306403	0.999876	1	1	1	0.864096	1	1
400.25421_8.316_6.44	0.673202	0.390375	0.195629	0.613815	0.41349	0.840979	0.959974	0.990054	0.886213	0.96328	0.629384	0.999876	1	1	1	1	1	1
630.38459_23.878_8.47	0.240902	0.715723	0.220557	0.99979	0.648886	0.906786	0.575642	0.924428	0.332319	0.94968	0.849103	0.999876	1	1	1	1	1	1
495.81679_21.186_6.94	0.482764	0.379701	0.0604743	0.850961	0.200753	1	0.508474	0.872981	0.23744	0.94968	0.626683	0.999876	1	1	1	1	1	1
496.06767_21.188_6.94	0.498807	0.393431	0.0618421	0.845692	0.209543	1	0.530887	0.868382	0.246916	0.94968	0.630553	0.999876	1	1	1	1	1	1
595.16533_23.706_8.06	0.496976	0.982079	0.792387	0.984099	0.997931	0.954257	0.953728	0.99694	0.911607	0.94968	0.994779	0.999876	1	1	1	1	1	1
537.37863_29.467_7.31	0.277747	0.533805	0.41683	0.986731	0.998472	0.577119	0.962593	0.730539	0.527164	0.94968	0.734755	0.999876	1	1	1	1	1	1
562.35769_22.138_7.62	0.518447	0.410362	0.0635941	0.839468	0.22065	1	0.558174	0.862941	0.258833	0.94968	0.640305	0.999876	1	1	1	1	1	1
616.88870_22.821_8.18	0.944204	0.198646	0.27816	0.886059	0.337056	0.837018	0.675836	0.997502	0.824213	0.967441	0.453958	0.999876	1	1	1	1	1	1
639.15254_23.069_8.41	0.915889	0.178776	0.281602	0.898116	0.318962	0.825732	0.63461	0.9948	0.816653	0.96328	0.424463	0.999876	1	1	1	1	1	1
569.35450_16.896_7.51	0.505366	0.39908	0.0624374	0.843639	0.213255	1	0.540043	0.866588	0.250906	0.94968	0.63307	0.999876	1	1	1	1	1	1
538.34417_19.622_7.29	0.511167	0.404069	0.0629331	0.841743	0.216484	1	0.548082	0.86493	0.254371	0.94968	0.635985	0.999876	1	1	1	1	1	1
551.13961_23.421_7.56	0.32998	0.765043	0.95626	0.888679	0.994193	0.963738	0.78739	0.997811	0.900189	0.94968	0.87571	0.999876	1	1	1	1	1	1
611.72109_20.647_8.01	0.934081	0.179061	0.293647	0.89849	0.32864	0.817079	0.647187	0.993493	0.834662	0.96328	0.424463	0.999876	1	1	1	1	1	1
580.34534_16.896_7.57	0.946811	0.187774	0.292125	0.893214	0.336891	0.822266	0.665702	0.995083	0.837997	0.967852	0.436812	0.999876	1	1	1	1	1	1
596.11452_22.558_7.97	0.133442	0.827969	0.527169	0.857677	0.988924	0.577569	0.714017	0.927882	0.445665	0.94968	0.917748	0.999876	1	1	1	1	1	1
487.97359_18.915_6.92	0.906154	0.17627	0.277582	0.899196	0.313125	0.827215	0.624978	0.994831	0.808976	0.96328	0.421748	0.999876	1	1	1	1	1	1
605.88198_22.692_8.07	0.930852	0.195804	0.272379	0.887431	0.329417	0.839988	0.663875	0.99763	0.813488	0.96328	0.448046	0.999876	1	1	1	1	1	1
507.07430_21.359_7.05	0.945544	0.185128	0.294559	0.895019	0.335955	0.819431	0.66191	0.994427	0.839669	0.967441	0.432979	0.999876	1	1	1	1	1	1
549.99956_20.054_7.61	0.950262	0.1891	0.293023	0.892499	0.339018	0.822259	0.669493	0.995186	0.840047	0.968948	0.438479	0.999876	1	1	1	1	1	1
429.26086_34.062_7.52	0.309624	0.731999	0.973352	0.869309	0.993098	0.964454	0.755301	0.995644	0.895898	0.94968	0.860182	0.999876	1	1	1	1	1	1
567.69518_20.052_7.58	0.922654	0.185215	0.278266	0.893835	0.323189	0.830869	0.646538	0.996044	0.816079	0.96328	0.432979	0.999876	1	1	1	1	1	1
502.64917_19.160_7.06	0.937227	0.189057	0.283932	0.891953	0.331756	0.828632	0.660697	0.996028	0.827006	0.963928	0.438479	0.999876	1	1	1	1	1	1
596.36473_22.559_7.97	0.137225	0.834084	0.515437	0.868674	0.986848	0.58679	0.716095	0.925555	0.443869	0.94968	0.923092	0.999876	1	1	1	1	1	1
684.42908_21.525_8.70	0.358755	0.747244	0.990752	0.895664	0.995163	0.975614	0.804193	0.995616	0.92585	0.94968	0.867078	0.999876	1	1	1	1	1	1
530.32560_21.682_7.27	0.934639	0.731465	0.458168	0.969786	0.85734	0.999078	0.976612	0.992339	0.923303	0.96328	0.860117	0.999876	1	1	1	1	1	1
563.09459_22.139_7.61	0.610855	0.433438	0.604165	0.999996	0.784361	0.997667	0.753045	0.996441	0.889043	0.955621	0.658756	0.999876	1	1	1	1	1	1
585.10766_22.422_7.85	0.621249	0.955631	0.70533	0.9991	0.995017	0.974644	0.981537	0.989446	0.923352	0.960624	0.982377	0.999876	1	1	1	1	1	1
552.33851_21.991_7.50	0.915958	0.677911	0.397626	0.957966	0.794128	0.998373	0.96041	0.990365	0.888117	0.96328	0.833004	0.999876	1	1	1	1	1	1
530.07474_21.683_7.27	0.601781	0.468686	0.656759	0.999776	0.833634	0.99904	0.776624	0.996002	0.907115	0.953232	0.683381	0.999876	1	1	1	1	1	1
517.32456_19.396_7.21	0.581814	0.459269	0.607152	0.99992	0.802395	0.999312	0.753635	0.997717	0.878423	0.950159	0.676219	0.999876	1	1	1	1	1	1
574.10115_22.283_7.73	0.92224	0.697906	0.410092	0.960274	0.812617	0.998723	0.966476	0.989994	0.896801	0.96328	0.839882	0.999876	1	1	1	1	1	1
518.08075_21.523_7.17	0.602287	0.967823	0.723415	0.998148	0.995441	0.973624	0.97743	0.992047	0.923747	0.953232	0.987191	0.999876	1	1	1	1	1	1
517.82958_21.523_7.17	0.600334	0.958	0.710203	0.998428	0.995184	0.97135	0.978078	0.990115	0.918399	0.953232	0.982377	0.999876	1	1	1	1	1	1
378.35811_33.505_7.24	0.531245	0.956248	0.696321	0.99577	0.987618	0.97232	0.945171	0.995188	0.888784	0.94968	0.982377	0.999876	1	1	1	1	1	1
302.30823_30.656_6.18	0.00659718	0.820555	0.813655	0.0912323	0.986766	0.140775	0.213862	1	0.28065	0.549935	0.912723	0.999876	1	1	1	1	1	1
596.02336_24.135_8.22	0.233671	0.63796	0.840738	0.700124	0.962289	0.647139	0.95189	0.996846	0.908538	0.94968	0.8104	0.999876	1	1	1	1	1	1
573.18205_24.047_7.91	0.287296	0.704404	0.876819	0.77734	0.980354	0.738858	0.95848	0.998194	0.927815	0.94968	0.840922	0.999876	1	1	1	1	1	1
576.56432_23.598_7.84	0.156394	0.960138	0.698031	0.523371	0.988179	0.736577	0.766907	0.995071	0.906527	0.94968	0.983259	0.999876	1	1	1	1	1	1
493.35257_29.520_6.91	0.310142	0.629168	0.939095	0.822834	0.977891	0.712083	0.97794	0.990098	0.918075	0.94968	0.80581	0.999876	1	1	1	1	1	1
598.92565_24.374_8.09	0.0608864	0.10373	0.116275	0.0899235	1	1	0.118977	0.118977	1	0.855409	0.367499	0.999876	1	1	1	1	1	1
568.92178_24.291_7.77	0.0579088	0.0996081	0.11189	0.0845906	1	1	0.112545	0.112545	1	0.847723	0.35988	0.999876	1	1	1	1	1	1
607.93615_24.416_8.41	0.370448	0.0731493	0.485151	0.694711	0.843977	0.843977	0.275346	0.275346	1	0.94968	0.307824	0.999876	1	1	1	1	1	1
577.91933_24.321_7.97	0.0393994	0.434517	0.451714	0.171619	1	0.803927	0.213384	0.686561	0.827054	0.847723	0.658851	0.999876	1	1	1	1	1	1
548.90736_24.242_7.65	0.058874	0.100949	0.113317	0.0863137	1	1	0.114628	0.114628	1	0.847723	0.361114	0.999876	1	1	1	1	1	1
695.25294_24.382_9.20	0.384256	0.0740261	0.498994	0.714999	0.838348	0.838348	0.283793	0.283793	1	0.94968	0.307824	0.999876	1	1	1	1	1	1
219.17468_15.947_5.12	0.312703	0.0699477	0.425817	0.60138	0.869658	0.869658	0.240896	0.240896	1	0.94968	0.307824	0.999876	1	1	1	1	1	1
620.22993_24.439_8.52	0.0588202	0.100874	0.113238	0.0862176	1	1	0.114512	0.114512	1	0.847723	0.361114	0.999876	1	1	1	1	1	1
620.87543_24.198_7.90	0.0573062	0.0987688	0.110996	0.0835175	1	1	0.111245	0.111245	1	0.847723	0.35988	0.999876	1	1	1	1	1	1
615.03332_24.191_8.03	0.0417257	0.486506	0.502848	0.19405	1	0.777096	0.238256	0.75715	0.802734	0.847723	0.695148	0.999876	1	1	1	1	1	1
701.02787_24.100_9.14	0.184619	0.274135	0.867903	0.679476	0.908524	0.999402	0.33489	0.786706	0.878639	0.94968	0.544648	0.999876	1	1	1	1	1	1
688.75745_24.363_9.11	0.286403	0.0688196	0.397904	0.554505	0.882695	0.882695	0.225748	0.225748	1	0.94968	0.307824	0.999876	1	1	1	1	1	1
540.17659_24.220_7.61	0.352587	0.0719475	0.467081	0.667327	0.85122	0.85122	0.264274	0.264274	1	0.94968	0.307824	0.999876	1	1	1	1	1	1
710.93986_24.412_9.35	0.389296	0.0742014	0.504043	0.722243	0.835949	0.835949	0.286566	0.286566	1	0.94968	0.307824	0.999876	1	1	1	1	1	1
701.75665_24.403_9.26	0.762816	0.037585	0.863323	0.992881	0.486669	0.486669	0.327067	0.327067	1	0.96328	0.257814	0.999876	1	1	1	1	1	1
655.72689_24.305_8.83	0.205933	0.286362	0.927784	0.737551	0.89544	0.999651	0.362732	0.824764	0.872383	0.94968	0.556853	0.999876	1	1	1	1	1	1
709.83289_24.122_9.23	0.215871	0.289737	0.949041	0.759836	0.889941	0.999769	0.374108	0.836653	0.871797	0.94968	0.559086	0.999876	1	1	1	1	1	1
584.20351_24.337_8.02	0.184351	0.0292698	0.289641	0.363649	0.815222	0.815222	0.101006	0.101006	1	0.94968	0.257814	0.999876	1	1	1	1	1	1
617.37436_24.421_8.41	0.788384	0.0376532	0.885858	0.995833	0.475232	0.475232	0.336695	0.336695	1	0.96328	0.257814	0.999876	1	1	1	1	1	1
595.92753_24.375_8.18	0.189229	0.270096	0.873115	0.689031	0.904209	0.999628	0.33633	0.785367	0.880771	0.94968	0.542474	0.999876	1	1	1	1	1	1
654.55820_24.288_8.16	0.83472	0.0383173	0.926177	0.998865	0.457993	0.457993	0.356825	0.356825	1	0.96328	0.257814	0.999876	1	1	1	1	1	1
693.59196_24.380_9.19	0.804569	0.0376965	0.900061	0.997196	0.46811	0.46811	0.342833	0.342833	1	0.96328	0.257814	0.999876	1	1	1	1	1	1
579.91724_24.336_7.98	0.216948	0.31479	0.976128	0.772295	0.895783	0.99923	0.392752	0.866455	0.860528	0.94968	0.581465	0.999876	1	1	1	1	1	1
565.18169_24.008_7.73	0.847907	0.0379224	0.937826	0.999321	0.450047	0.450047	0.359952	0.359952	1	0.96328	0.257814	0.999876	1	1	1	1	1	1
351.26400_28.106_6.57	0.347659	0.0720056	0.461991	0.65944	0.854216	0.854216	0.262023	0.262023	1	0.94968	0.307824	0.999876	1	1	1	1	1	1
611.53568_24.193_8.42	0.733122	0.255058	0.244942	0.745982	0.999949	0.889211	0.807903	0.361594	0.88435	0.96328	0.524839	0.999876	1	1	1	1	1	1
617.51652_24.424_8.45	0.838683	0.0383419	0.929623	0.999016	0.456369	0.456369	0.35842	0.35842	1	0.96328	0.257814	0.999876	1	1	1	1	1	1
623.09607_24.433_8.42	0.904254	0.0385502	0.986367	0.999993	0.429095	0.429095	0.384251	0.384251	1	0.96328	0.257814	0.999876	1	1	1	1	1	1
664.07258_24.318_8.89	0.828274	0.039502	0.920077	0.998561	0.467186	0.467186	0.359722	0.359722	1	0.96328	0.259584	0.999876	1	1	1	1	1	1
612.37655_24.408_8.27	0.826332	0.0382218	0.918895	0.998497	0.461209	0.461209	0.353262	0.353262	1	0.96328	0.257814	0.999876	1	1	1	1	1	1
564.62434_24.286_7.79	0.0570835	0.0984581	0.110665	0.0831214	1	1	0.110765	0.110765	1	0.847723	0.35988	0.999876	1	1	1	1	1	1
352.09464_7.618_6.19	0.33412	0.0714889	0.448039	0.637448	0.860809	0.860809	0.25442	0.25442	1	0.94968	0.307824	0.999876	1	1	1	1	1	1
705.42674_24.402_9.29	0.393	0.0746049	0.507696	0.727433	0.834888	0.834888	0.289191	0.289191	1	0.94968	0.307824	0.999876	1	1	1	1	1	1
578.06865_24.317_7.92	0.0410388	0.462039	0.478815	0.184575	1	0.791487	0.227795	0.725066	0.815797	0.847723	0.678545	0.999876	1	1	1	1	1	1
619.51859_24.427_8.42	0.900253	0.0386789	0.982864	0.999986	0.431462	0.431462	0.38332	0.38332	1	0.96328	0.257814	0.999876	1	1	1	1	1	1
665.23767_24.318_8.73	0.733714	0.0371735	0.837651	0.988148	0.498068	0.498068	0.31477	0.31477	1	0.96328	0.257814	0.999876	1	1	1	1	1	1
219.35055_23.877_5.11	0.159215	0.0278958	0.258864	0.309438	0.833668	0.833668	0.089116	0.089116	1	0.94968	0.257814	0.999876	1	1	1	1	1	1
219.40171_23.877_5.11	0.157192	0.0276479	0.256373	0.305101	0.834377	0.834377	0.0878868	0.0878868	1	0.94968	0.257814	0.999876	1	1	1	1	1	1
432.15571_14.352_6.49	0.298673	0.0705661	0.4108	0.576358	0.879432	0.879432	0.235205	0.235205	1	0.94968	0.307824	0.999876	1	1	1	1	1	1
649.05025_24.271_8.72	0.207665	0.273669	0.910504	0.732304	0.893345	0.999872	0.355779	0.806004	0.881259	0.94968	0.544648	0.999876	1	1	1	1	1	1
620.37313_24.447_8.52	0.181707	0.261808	0.842503	0.663113	0.909364	0.99964	0.323999	0.762488	0.886643	0.94968	0.531346	0.999876	1	1	1	1	1	1
637.81859_24.466_8.65	0.811461	0.0376964	0.906102	0.997672	0.465001	0.465001	0.345373	0.345373	1	0.96328	0.257814	0.999876	1	1	1	1	1	1
629.09621_24.454_8.55	0.919009	0.0390877	0.998858	1	0.425636	0.425636	0.392482	0.392482	1	0.96328	0.258051	0.999876	1	1	1	1	1	1
637.96316_24.469_8.63	0.824306	0.0381982	0.917135	0.998397	0.461985	0.461985	0.352401	0.352401	1	0.96328	0.257814	0.999876	1	1	1	1	1	1
585.50027_24.343_8.06	0.0393953	0.440565	0.457676	0.173407	1	0.799485	0.21538	0.695236	0.823038	0.847723	0.662565	0.999876	1	1	1	1	1	1
219.31241_21.533_5.11	0.377173	0.0747677	0.491703	0.70439	0.844196	0.844196	0.281975	0.281975	1	0.94968	0.307824	0.999876	1	1	1	1	1	1
188.07106_3.553_4.36	0.241275	0.8641	0.281542	0.37814	0.791748	0.818935	0.932441	0.914238	0.999951	0.94968	0.944085	0.999876	1	1	1	1	1	1
633.54729_24.222_7.94	0.695032	0.0369736	0.803102	0.979083	0.515672	0.515672	0.300108	0.300108	1	0.96328	0.257814	0.999876	1	1	1	1	1	1
579.35144_24.331_8.03	0.44	0.549247	0.454107	0.705991	0.999198	0.999979	0.815139	0.765764	0.999759	0.94968	0.748782	0.999876	1	1	1	1	1	1
603.37030_24.384_8.20	0.180458	0.279481	0.8694	0.673676	0.911275	0.999056	0.334281	0.792354	0.874006	0.94968	0.551232	0.999876	1	1	1	1	1	1
629.70846_24.228_8.15	0.703389	0.0374321	0.810426	0.981285	0.514219	0.514219	0.305008	0.305008	1	0.96328	0.257814	0.999876	1	1	1	1	1	1
580.02316_24.064_7.80	0.164554	0.876807	0.224612	0.258443	0.851819	0.859947	0.766448	0.756207	0.999998	0.94968	0.951543	0.999876	1	1	1	1	1	1
595.21535_24.388_8.29	0.278521	0.0690177	0.389337	0.539822	0.887894	0.887894	0.2222	0.2222	1	0.94968	0.307824	0.999876	1	1	1	1	1	1
669.07172_24.325_8.93	0.930915	0.131195	0.477279	0.984358	0.936021	0.591617	0.786566	0.379334	0.911226	0.96328	0.402773	0.999876	1	1	1	1	1	1
610.51471_24.406_8.35	0.500985	0.132067	0.763384	0.992863	0.561902	0.911592	0.392407	0.786778	0.919293	0.94968	0.402773	0.999876	1	1	1	1	1	1
711.60210_24.414_9.37	0.779754	0.0374796	0.878328	0.994961	0.478225	0.478225	0.332769	0.332769	1	0.96328	0.257814	0.999876	1	1	1	1	1	1
611.80412_24.407_8.38	0.0400142	0.462632	0.479399	0.181783	1	0.786319	0.2247	0.725868	0.811111	0.847723	0.678552	0.999876	1	1	1	1	1	1
542.76792_24.225_7.52	0.040442	0.479316	0.495791	0.18806	1	0.776276	0.23165	0.747936	0.801988	0.847723	0.691107	0.999876	1	1	1	1	1	1
388.25418_9.786_6.26	0.296578	0.440193	0.0551245	0.183528	0.779557	1	0.736471	0.226635	0.804971	0.94968	0.662565	0.999876	1	1	1	1	1	1
543.05011_24.231_7.59	0.235941	0.283084	0.966365	0.791181	0.878996	0.999982	0.3876	0.838505	0.880614	0.94968	0.554502	0.999876	1	1	1	1	1	1
600.50988_24.382_8.13	0.246655	0.323581	0.957683	0.832369	0.876686	0.999718	0.424539	0.896225	0.85583	0.94968	0.589248	0.999876	1	1	1	1	1	1
446.21510_32.285_7.54	0.298518	0.0708327	0.410592	0.576009	0.880137	0.880137	0.235645	0.235645	1	0.94968	0.307824	0.999876	1	1	1	1	1	1
648.39028_24.282_8.74	0.209452	0.302368	0.952486	0.752824	0.896667	0.999356	0.377055	0.848009	0.864564	0.94968	0.571853	0.999876	1	1	1	1	1	1
620.08868_24.434_8.45	0.812042	0.0377425	0.906593	0.997708	0.464993	0.464993	0.345796	0.345796	1	0.96328	0.257814	0.999876	1	1	1	1	1	1
622.51913_24.443_8.45	0.822446	0.0382829	0.915475	0.998299	0.463276	0.463276	0.352091	0.352091	1	0.96328	0.257814	0.999876	1	1	1	1	1	1
701.25428_24.411_9.26	0.793677	0.0376341	0.890522	0.99632	0.472709	0.472709	0.33855	0.33855	1	0.96328	0.257814	0.999876	1	1	1	1	1	1
711.10790_24.411_9.35	0.748818	0.0375603	0.850925	0.990791	0.493101	0.493101	0.321885	0.321885	1	0.96328	0.257814	0.999876	1	1	1	1	1	1
571.05591_24.304_7.89	0.0435765	0.582158	0.596343	0.229566	1	0.718613	0.276928	0.862095	0.749208	0.847723	0.779125	0.999876	1	1	1	1	1	1
571.35681_24.041_7.78	0.766183	0.0676253	0.282148	0.811008	0.941815	0.571887	0.508452	0.170063	0.892297	0.96328	0.307824	0.999876	1	1	1	1	1	1
571.78331_24.307_7.92	0.515201	0.598167	0.503645	0.787859	0.999346	0.999999	0.875191	0.823479	0.999589	0.94968	0.789437	0.999876	1	1	1	1	1	1
219.60061_23.877_5.11	0.341339	0.0143852	0.474157	0.678167	0.524341	0.524341	0.100031	0.100031	1	0.94968	0.201605	0.999876	1	1	1	1	1	1
704.09861_24.400_9.28	0.821527	0.0376699	0.914923	0.998266	0.460344	0.460344	0.348974	0.348974	1	0.96328	0.257814	0.999876	1	1	1	1	1	1
588.51757_24.113_8.10	0.042329	0.545207	0.560304	0.213998	1	0.738393	0.260076	0.825486	0.767391	0.847723	0.74577	0.999876	1	1	1	1	1	1
601.93097_24.388_8.26	0.256606	0.26356	0.95999	0.810871	0.867275	0.99998	0.391294	0.818913	0.897921	0.94968	0.533468	0.999876	1	1	1	1	1	1
603.79252_24.402_8.35	0.413561	0.497908	0.534615	0.736195	0.999995	0.999996	0.757906	0.783548	0.999969	0.94968	0.703684	0.999876	1	1	1	1	1	1
304.70497_23.878_6.41	0.68366	0.0371403	0.792786	0.975708	0.522279	0.522279	0.296767	0.296767	1	0.96328	0.257814	0.999876	1	1	1	1	1	1
616.66139_24.423_8.40	0.851387	0.0382534	0.940717	0.999411	0.450301	0.450301	0.362781	0.362781	1	0.96328	0.257814	0.999876	1	1	1	1	1	1
698.25472_24.382_9.22	0.793354	0.0375458	0.890275	0.996295	0.472365	0.472365	0.338037	0.338037	1	0.96328	0.257814	0.999876	1	1	1	1	1	1
701.58893_24.404_9.27	0.714033	0.0375174	0.819933	0.983913	0.509514	0.509514	0.309176	0.309176	1	0.96328	0.257814	0.999876	1	1	1	1	1	1
592.63650_24.362_8.13	0.528424	0.153011	0.685234	0.998189	0.552333	0.925711	0.432681	0.8542	0.899587	0.94968	0.40729	0.999876	1	1	1	1	1	1
683.07993_24.357_9.07	0.491721	0.14239	0.743855	0.993171	0.568912	0.926722	0.400682	0.812669	0.908385	0.94968	0.402773	0.999876	1	1	1	1	1	1
690.58523_24.371_9.15	0.781732	0.0375066	0.88006	0.995171	0.477466	0.477466	0.333611	0.333611	1	0.96328	0.257814	0.999876	1	1	1	1	1	1
570.91404_24.303_7.89	0.465578	0.132369	0.139663	0.44611	0.999997	0.869067	0.511122	0.160403	0.877478	0.94968	0.402773	0.999876	1	1	1	1	1	1
614.70715_24.191_8.17	0.669726	0.0377426	0.779945	0.971045	0.532761	0.532761	0.294288	0.294288	1	0.96328	0.257814	0.999876	1	1	1	1	1	1
548.04771_24.241_7.64	0.146832	0.261482	0.768898	0.567541	0.932493	0.997871	0.289305	0.72465	0.882409	0.94968	0.531159	0.999876	1	1	1	1	1	1
594.22041_24.369_8.12	0.0250904	0.00404836	0.0641771	0.0348997	0.799831	0.799831	0.00799221	0.00799221	1	0.847723	0.117816	0.999876	1	1	1	0.509206	0.670405	1
289.06854_3.628_5.34	0.681561	0.0372211	0.790858	0.975041	0.523796	0.523796	0.296357	0.296357	1	0.96328	0.257814	0.999876	1	1	1	1	1	1
554.33551_24.258_7.72	0.191406	0.294418	0.908013	0.707937	0.90725	0.998956	0.354903	0.822864	0.867558	0.94968	0.564131	0.999876	1	1	1	1	1	1
689.92227_24.369_9.12	0.488215	0.158727	0.717723	0.994345	0.580446	0.942935	0.419363	0.84724	0.896171	0.94968	0.407888	0.999876	1	1	1	1	1	1
753.65861_24.230_9.62	0.687193	0.0371669	0.795962	0.976782	0.520677	0.520677	0.298132	0.298132	1	0.96328	0.257814	0.999876	1	1	1	1	1	1
273.19741_4.812_5.12	0.188741	0.294595	0.910451	0.705277	0.906532	0.998805	0.351841	0.824076	0.864034	0.94968	0.564131	0.999876	1	1	1	1	1	1
631.38595_24.454_8.55	0.919618	0.0389512	0.999436	1	0.424682	0.424682	0.392074	0.392074	1	0.96328	0.257814	0.999876	1	1	1	1	1	1
631.67349_24.453_8.53	0.792092	0.0378496	0.88904	0.99617	0.474627	0.474627	0.338929	0.338929	1	0.96328	0.257814	0.999876	1	1	1	1	1	1
675.57929_24.340_8.99	0.81701	0.0378916	0.910881	0.998008	0.46358	0.46358	0.348307	0.348307	1	0.96328	0.257814	0.999876	1	1	1	1	1	1
694.25122_24.392_9.20	0.834812	0.0378615	0.926445	0.998878	0.455486	0.455486	0.354783	0.354783	1	0.96328	0.257814	0.999876	1	1	1	1	1	1
548.33199_24.243_7.68	0.80122	0.0381378	0.896942	0.996927	0.472055	0.472055	0.343573	0.343573	1	0.96328	0.257814	0.999876	1	1	1	1	1	1
590.49715_24.359_8.13	0.209534	0.358867	0.966197	0.787098	0.900312	0.996282	0.412617	0.913147	0.826473	0.94968	0.616188	0.999876	1	1	1	1	1	1
560.91278_24.277_7.79	0.154256	0.0277371	0.25262	0.298584	0.838277	0.838277	0.0870067	0.0870067	1	0.94968	0.257814	0.999876	1	1	1	1	1	1
569.06204_24.291_7.79	0.296366	0.0694818	0.408507	0.572497	0.878273	0.878273	0.231958	0.231958	1	0.94968	0.307824	0.999876	1	1	1	1	1	1
586.20886_24.341_8.05	0.248099	0.0626197	0.924515	0.802003	0.561976	0.916975	0.160753	0.45281	0.914307	0.94968	0.306288	0.999876	1	1	1	1	1	1
666.06853_24.319_8.76	0.465082	0.562698	0.563798	0.788148	0.999999	0.99998	0.825345	0.83668	0.999996	0.94968	0.761298	0.999876	1	1	1	1	1	1
587.36066_24.095_8.01	0.739424	0.469348	0.795433	0.976985	0.987711	0.987479	0.889308	0.888439	1	0.96328	0.683997	0.999876	1	1	1	1	1	1
665.73551_24.321_8.90	0.439998	0.16172	0.75034	0.985832	0.604023	0.958602	0.395985	0.836649	0.888169	0.94968	0.407897	0.999876	1	1	1	1	1	1
571.62622_24.305_7.89	0.636849	0.290635	0.172538	0.600558	0.992612	0.93719	0.805731	0.319135	0.850198	0.96328	0.559683	0.999876	1	1	1	1	1	1
744.85336_24.212_9.55	0.447441	0.144138	0.785849	0.983482	0.595875	0.942482	0.379916	0.79541	0.906037	0.94968	0.402773	0.999876	1	1	1	1	1	1
584.52337_24.094_8.03	0.221676	0.318813	0.990816	0.784243	0.892937	0.999258	0.399622	0.874777	0.858082	0.94968	0.584323	0.999876	1	1	1	1	1	1
555.49245_24.256_7.66	0.8395	0.135983	0.529748	0.996662	0.921134	0.556974	0.830386	0.41769	0.907279	0.96328	0.402773	0.999876	1	1	1	1	1	1
622.80536_24.440_8.48	0.587948	0.132311	0.685635	0.999654	0.517695	0.879283	0.435847	0.824653	0.921852	0.950764	0.402773	0.999876	1	1	1	1	1	1
397.32849_35.507_7.18	0.175679	0.934613	0.238662	0.279805	0.84112	0.846535	0.80553	0.799347	0.999999	0.94968	0.977897	0.999876	1	1	1	1	1	1
443.18888_32.215_7.60	0.351561	0.0719112	0.46603	0.665705	0.851723	0.851723	0.263706	0.263706	1	0.94968	0.307824	0.999876	1	1	1	1	1	1
665.60696_23.991_8.81	0.4796	0.634639	0.628076	0.827326	0.999997	0.999557	0.861651	0.898386	0.999798	0.94968	0.80881	0.999876	1	1	1	1	1	1
631.22061_24.218_8.28	0.664034	0.30598	0.170437	0.61442	0.98997	0.936758	0.832065	0.328389	0.83623	0.96328	0.574115	0.999876	1	1	1	1	1	1
622.53842_24.214_8.41	0.442671	0.589115	0.527391	0.751528	0.999781	0.999739	0.829104	0.831638	1	0.94968	0.783959	0.999876	1	1	1	1	1	1
537.75515_24.207_7.52	0.184742	0.31154	0.920685	0.703607	0.912786	0.997626	0.359253	0.841854	0.855235	0.94968	0.578836	0.999876	1	1	1	1	1	1
599.22356_24.378_8.20	0.237797	0.347051	0.381225	0.469093	0.999995	0.999887	0.50762	0.562028	0.999767	0.94968	0.607233	0.999876	1	1	1	1	1	1
605.95016_24.397_8.26	0.879312	0.0388092	0.964716	0.999876	0.441105	0.441105	0.375914	0.375914	1	0.96328	0.257814	0.999876	1	1	1	1	1	1
626.37814_24.229_8.54	0.806449	0.451585	0.843114	0.990804	0.978986	0.976721	0.902414	0.896807	0.999999	0.96328	0.66905	0.999876	1	1	1	1	1	1
395.21931_30.119_6.75	0.0579348	0.0996443	0.111929	0.0846369	1	1	0.112601	0.112601	1	0.847723	0.35988	0.999876	1	1	1	1	1	1
556.48240_24.259_7.66	0.265075	0.0891983	0.937247	0.869132	0.566326	0.953792	0.202008	0.604085	0.871022	0.94968	0.338289	0.999876	1	1	1	1	1	1
616.80338_24.423_8.43	0.606964	0.138411	0.653848	0.999959	0.50972	0.88072	0.453363	0.848528	0.916285	0.954471	0.402773	0.999876	1	1	1	1	1	1
631.53037_24.455_8.57	0.578158	0.134181	0.691527	0.999443	0.524424	0.885601	0.433875	0.82478	0.920656	0.950159	0.402773	0.999876	1	1	1	1	1	1
603.03079_24.153_8.16	0.729086	0.0375792	0.83336	0.987198	0.502599	0.502599	0.314846	0.314846	1	0.96328	0.257814	0.999876	1	1	1	1	1	1
609.93823_24.413_8.33	0.434088	0.157974	0.766788	0.983044	0.607631	0.957469	0.388748	0.824315	0.892276	0.94968	0.407888	0.999876	1	1	1	1	1	1
590.06616_24.362_8.17	0.871465	0.0387035	0.957963	0.99979	0.443942	0.443942	0.372439	0.372439	1	0.96328	0.257814	0.999876	1	1	1	1	1	1
614.36811_24.423_8.45	0.567916	0.120723	0.736336	0.998363	0.525292	0.8693	0.40998	0.78016	0.932975	0.94968	0.402114	0.999876	1	1	1	1	1	1
567.20282_24.295_7.86	0.726336	0.0381781	0.830664	0.986578	0.507309	0.507309	0.316395	0.316395	1	0.96328	0.257814	0.999876	1	1	1	1	1	1
572.51903_24.038_7.84	0.294718	0.482596	0.401402	0.540932	0.999302	0.998661	0.666362	0.684672	0.999991	0.94968	0.693862	0.999876	1	1	1	1	1	1
587.93234_24.345_8.01	0.523235	0.159524	0.676564	0.998213	0.557435	0.933509	0.43793	0.865993	0.893697	0.94968	0.407888	0.999876	1	1	1	1	1	1
567.62287_24.294_7.89	0.819152	0.0676943	0.308943	0.855903	0.928435	0.546801	0.532527	0.182652	0.893031	0.96328	0.307824	0.999876	1	1	1	1	1	1
383.25798_25.501_6.33	0.184616	0.0758346	0.896257	0.708584	0.620226	0.970683	0.14594	0.48053	0.876458	0.94968	0.307824	0.999876	1	1	1	1	1	1
274.01370_4.527_5.07	0.192326	0.960479	0.276518	0.323818	0.830522	0.814547	0.86211	0.876643	0.999989	0.94968	0.983259	0.999876	1	1	1	1	1	1
619.66145_24.428_8.45	0.842632	0.30456	0.920415	0.997723	0.908975	0.917496	0.824187	0.836366	0.999995	0.96328	0.573025	0.999876	1	1	1	1	1	1
305.03145_9.037_4.94	0.452564	0.630243	0.535136	0.761998	0.999405	0.999328	0.853669	0.855949	1	0.94968	0.806314	0.999876	1	1	1	1	1	1
580.35248_24.077_7.99	0.995921	0.154465	0.384979	0.949176	0.978341	0.663278	0.79876	0.357113	0.887527	0.998371	0.407888	0.999876	1	1	1	1	1	1
573.76733_24.311_7.90	0.844302	0.342893	0.891635	0.996659	0.936778	0.93551	0.854515	0.852506	1	0.96328	0.604034	0.999876	1	1	1	1	1	1
671.40852_24.331_8.95	0.46679	0.17095	0.709062	0.992811	0.59391	0.957926	0.42135	0.865573	0.882738	0.94968	0.415294	0.999876	1	1	1	1	1	1
629.87462_24.231_8.50	0.796272	0.142581	0.543291	0.998682	0.922498	0.547096	0.856868	0.436357	0.899905	0.96328	0.402773	0.999876	1	1	1	1	1	1
637.21159_24.248_8.40	0.688688	0.0374073	0.797212	0.977196	0.521328	0.521328	0.299661	0.299661	1	0.96328	0.257814	0.999876	1	1	1	1	1	1
680.58046_24.352_9.06	0.453281	0.155233	0.754829	0.987521	0.596426	0.950169	0.396183	0.826034	0.896203	0.94968	0.407888	0.999876	1	1	1	1	1	1
622.04409_24.212_8.50	0.498846	0.131224	0.770283	0.99218	0.564283	0.911213	0.390468	0.781959	0.920924	0.94968	0.402773	0.999876	1	1	1	1	1	1
574.21613_24.306_7.90	0.550444	0.0214215	0.202176	0.610391	0.844388	0.435426	0.224991	0.0610359	0.898848	0.94968	0.257814	0.999876	1	1	1	1	1	1
531.60896_24.185_7.44	0.50321	0.15364	0.707114	0.99607	0.566198	0.934211	0.420435	0.845363	0.898298	0.94968	0.407784	0.999876	1	1	1	1	1	1
594.69827_24.118_8.03	0.74546	0.375492	0.95422	0.99374	0.933177	0.970611	0.82687	0.896009	0.998889	0.96328	0.624266	0.999876	1	1	1	1	1	1
601.50406_24.402_8.36	0.02002	0.0038365	0.053607	0.0262389	0.825624	0.825624	0.00675	0.00675	1	0.815672	0.113315	0.999876	1	1	1	0.509206	0.664816	1
401.26838_25.501_6.85	0.195248	0.0764326	0.919095	0.734454	0.609455	0.967068	0.151891	0.49378	0.876586	0.94968	0.307824	0.999876	1	1	1	1	1	1
592.35893_24.364_8.15	0.259403	0.350615	0.380295	0.492781	0.999998	0.999987	0.534315	0.564416	0.999961	0.94968	0.608047	0.999876	1	1	1	1	1	1
262.59859_4.640_3.87	0.437655	0.15889	0.762039	0.984209	0.606348	0.957158	0.391823	0.827697	0.89196	0.94968	0.407888	0.999876	1	1	1	1	1	1
593.50759_24.365_8.17	0.924185	0.419655	0.969224	0.999868	0.945905	0.948395	0.919145	0.922384	1	0.96328	0.6466	0.999876	1	1	1	1	1	1
624.37844_24.215_8.47	0.464193	0.173292	0.707895	0.992606	0.596654	0.960053	0.422601	0.868667	0.880951	0.94968	0.417071	0.999876	1	1	1	1	1	1
601.36221_24.405_8.39	0.912441	0.147402	0.46234	0.984241	0.954036	0.610427	0.821235	0.395589	0.899212	0.96328	0.402773	0.999876	1	1	1	1	1	1
575.35175_24.315_7.87	0.393065	0.193287	0.526455	0.727872	0.962997	0.971297	0.476241	0.500416	0.999978	0.94968	0.444203	0.999876	1	1	1	1	1	1
307.22453_32.935_6.39	0.175849	0.939061	0.240816	0.281486	0.841258	0.844591	0.807323	0.803549	1	0.94968	0.978371	0.999876	1	1	1	1	1	1
315.14347_20.445_5.67	0.332279	0.203323	0.809744	0.943619	0.695563	0.993757	0.375767	0.858479	0.854135	0.94968	0.462421	0.999876	1	1	1	1	1	1
766.53135_31.005_9.83	0.825665	0.448554	0.868365	0.994058	0.974518	0.973564	0.906031	0.903947	1	0.96328	0.667681	0.999876	1	1	1	1	1	1
639.05372_24.255_8.63	0.454882	0.1515	0.760906	0.987219	0.593895	0.946698	0.392618	0.81805	0.899428	0.94968	0.40729	0.999876	1	1	1	1	1	1
153.13327_4.824_3.51	0.670519	0.0370895	0.780926	0.97142	0.528568	0.528568	0.291904	0.291904	1	0.96328	0.257814	0.999876	1	1	1	1	1	1
676.22772_30.669_8.87	0.463985	0.161754	0.725437	0.991396	0.589642	0.952352	0.408989	0.847669	0.888765	0.94968	0.407897	0.999876	1	1	1	1	1	1
213.11223_13.470_4.48	0.424124	0.153006	0.791978	0.977947	0.61405	0.956436	0.377987	0.805752	0.897849	0.94968	0.40729	0.999876	1	1	1	1	1	1
269.16464_25.127_5.56	0.405317	0.158176	0.801062	0.972	0.62743	0.964815	0.373422	0.808852	0.892448	0.94968	0.407888	0.999876	1	1	1	1	1	1
653.72969_24.288_8.77	0.43555	0.615367	0.515187	0.738385	0.999277	0.99929	0.838914	0.838553	1	0.94968	0.799557	0.999876	1	1	1	1	1	1
661.06715_24.306_8.85	0.23929	0.073855	0.970125	0.810568	0.573867	0.943646	0.17081	0.511884	0.891107	0.94968	0.307824	0.999876	1	1	1	1	1	1
772.48975_31.170_9.72	0.184265	0.319616	0.938354	0.711022	0.911419	0.99697	0.363178	0.855032	0.84666	0.94968	0.584323	0.999876	1	1	1	1	1	1
639.19149_23.897_8.52	0.124183	0.0274771	0.772654	0.550983	0.472162	0.904432	0.0583029	0.24467	0.869499	0.94968	0.257814	0.999876	1	1	1	1	1	1
567.92645_24.292_7.82	0.0698863	0.0253174	0.616985	0.344056	0.545053	0.957224	0.0379082	0.184289	0.849806	0.899616	0.257814	0.999876	1	1	1	0.864096	1	1
686.91381_24.376_9.13	0.484668	0.144684	0.757172	0.991473	0.58045	0.93098	0.401041	0.809849	0.910449	0.94968	0.402773	0.999876	1	1	1	1	1	1
214.21678_30.430_5.57	0.458869	0.64861	0.536527	0.766793	0.999112	0.999114	0.865105	0.865078	1	0.94968	0.814188	0.999876	1	1	1	1	1	1
629.38076_24.231_8.38	0.498205	0.243039	0.566615	0.821891	0.974113	0.968299	0.606686	0.587478	0.99999	0.94968	0.510209	0.999876	1	1	1	1	1	1
355.13649_20.454_5.84	0.379441	0.176689	0.79677	0.964887	0.652737	0.979801	0.378679	0.834754	0.876878	0.94968	0.422394	0.999876	1	1	1	1	1	1
219.17476_24.629_6.63	0.73954	0.0376005	0.842663	0.989197	0.497725	0.497725	0.318706	0.318706	1	0.96328	0.257814	0.999876	1	1	1	1	1	1
257.13812_20.928_5.12	0.07341	0.140376	0.586806	0.325347	0.903375	0.998823	0.127256	0.457896	0.860776	0.899616	0.402773	0.999876	1	1	1	1	1	1
621.21142_24.205_8.33	0.106122	0.219206	0.165824	0.165793	0.998459	0.999133	0.267322	0.255859	0.999993	0.94968	0.485384	0.999876	1	1	1	1	1	1
307.03267_4.640_3.89	0.44258	0.599559	0.544601	0.76086	0.999843	0.999601	0.832409	0.845832	0.999993	0.94968	0.789786	0.999876	1	1	1	1	1	1
145.03355_4.511_3.19	0.173173	0.298733	0.884997	0.669146	0.91725	0.997527	0.339189	0.816273	0.859608	0.94968	0.568567	0.999876	1	1	1	1	1	1
325.97531_3.629_5.21	0.419265	0.165982	0.767395	0.979935	0.620329	0.966294	0.389619	0.834511	0.885233	0.94968	0.41069	0.999876	1	1	1	1	1	1
592.36082_24.120_8.13	0.550835	0.239274	0.649651	0.886518	0.954028	0.956243	0.627879	0.633491	1	0.94968	0.506238	0.999876	1	1	1	1	1	1
233.98249_3.833_4.36	0.199362	0.0779291	0.922482	0.741414	0.611988	0.966883	0.156029	0.499869	0.878638	0.94968	0.310844	0.999876	1	1	1	1	1	1
307.03285_16.481_4.96	0.449107	0.687305	0.594569	0.78976	0.999537	0.997393	0.870827	0.90574	0.999808	0.94968	0.838274	0.999876	1	1	1	1	1	1
305.03118_4.826_4.96	0.185301	0.299158	0.910083	0.699874	0.90932	0.998391	0.351465	0.827646	0.860773	0.94968	0.568799	0.999876	1	1	1	1	1	1
320.58453_9.045_4.11	0.421929	0.159409	0.795316	0.976861	0.626116	0.96113	0.385421	0.813214	0.897866	0.94968	0.407888	0.999876	1	1	1	1	1	1
304.02432_4.479_3.78	0.784684	0.40057	0.850886	0.989653	0.966179	0.968346	0.867907	0.872697	1	0.96328	0.63307	0.999876	1	1	1	1	1	1
294.15633_4.739_5.56	0.920991	0.13875	0.466566	0.983931	0.946241	0.599766	0.804367	0.384956	0.903557	0.96328	0.402773	0.999876	1	1	1	1	1	1
608.21940_24.401_8.29	0.345364	0.0716333	0.459684	0.65584	0.854622	0.854622	0.26015	0.26015	1	0.94968	0.307824	0.999876	1	1	1	1	1	1
686.08157_24.367_9.12	0.698117	0.0392366	0.804975	0.979661	0.527009	0.527009	0.310557	0.310557	1	0.96328	0.258436	0.999876	1	1	1	1	1	1
519.74318_24.179_7.60	0.314398	0.0701686	0.427571	0.604271	0.869188	0.869188	0.242163	0.242163	1	0.94968	0.307824	0.999876	1	1	1	1	1	1
647.21960_24.275_8.54	0.188038	0.315158	0.93093	0.713156	0.911421	0.99765	0.364886	0.848788	0.853852	0.94968	0.581767	0.999876	1	1	1	1	1	1
653.06596_24.279_8.11	0.809199	0.0380779	0.903965	0.99751	0.468113	0.468113	0.346254	0.346254	1	0.96328	0.257814	0.999876	1	1	1	1	1	1
696.76207_24.385_9.19	0.728944	0.0370677	0.833442	0.987217	0.499741	0.499741	0.312602	0.312602	1	0.96328	0.257814	0.999876	1	1	1	1	1	1
679.74510_24.353_9.01	0.0396903	0.447429	0.464438	0.176296	1	0.795852	0.218601	0.704938	0.81975	0.847723	0.667051	0.999876	1	1	1	1	1	1
585.02321_24.097_8.05	0.700468	0.0374243	0.807805	0.980515	0.515608	0.515608	0.303932	0.303932	1	0.96328	0.257814	0.999876	1	1	1	1	1	1
595.64206_24.369_8.17	0.48156	0.170542	0.693351	0.995108	0.584034	0.953972	0.428669	0.871624	0.882644	0.94968	0.415005	0.999876	1	1	1	1	1	1
703.93648_24.398_9.27	0.735267	0.0371446	0.839047	0.988446	0.497162	0.497162	0.315203	0.315203	1	0.96328	0.257814	0.999876	1	1	1	1	1	1
693.91810_24.397_9.16	0.823926	0.0378591	0.916942	0.998386	0.46031	0.46031	0.350724	0.350724	1	0.96328	0.257814	0.999876	1	1	1	1	1	1
610.36900_24.175_8.23	0.777156	0.0380312	0.875811	0.994644	0.482497	0.482497	0.334254	0.334254	1	0.96328	0.257814	0.999876	1	1	1	1	1	1
586.93900_24.344_8.01	0.499917	0.151982	0.723867	0.994993	0.5733	0.933338	0.417721	0.835647	0.903622	0.94968	0.40729	0.999876	1	1	1	1	1	1
618.80670_24.428_8.45	0.222525	0.259963	0.911257	0.752044	0.883518	0.999999	0.359448	0.793548	0.892909	0.94968	0.529978	0.999876	1	1	1	1	1	1
592.78114_24.365_8.18	0.242744	0.271505	0.958629	0.795694	0.873747	1	0.385137	0.825398	0.8889	0.94968	0.542602	0.999876	1	1	1	1	1	1
639.39225_23.897_8.52	0.163006	0.0276948	0.263694	0.317875	0.828141	0.828141	0.0900638	0.0900638	1	0.94968	0.257814	0.999876	1	1	1	1	1	1
549.33735_24.245_7.64	0.040059	0.448459	0.465452	0.17766	1	0.796812	0.220119	0.70638	0.82062	0.847723	0.667681	0.999876	1	1	1	1	1	1
761.47283_24.244_9.71	0.608067	0.0379328	0.7235	0.943951	0.565933	0.565933	0.273192	0.273192	1	0.954471	0.257814	0.999876	1	1	1	1	1	1
596.35640_24.371_8.07	0.660658	0.0370367	0.772002	0.967895	0.53325	0.53325	0.288204	0.288204	1	0.96328	0.257814	0.999876	1	1	1	1	1	1
717.24448_24.137_9.30	0.700388	0.0376615	0.807637	0.980465	0.51701	0.51701	0.304894	0.304894	1	0.96328	0.257814	0.999876	1	1	1	1	1	1
744.45420_24.227_9.49	0.621176	0.0374491	0.735764	0.950797	0.556134	0.556134	0.27594	0.27594	1	0.960624	0.257814	0.999876	1	1	1	1	1	1
690.91741_24.368_9.15	0.786386	0.0375865	0.884127	0.995642	0.475776	0.475776	0.335667	0.335667	1	0.96328	0.257814	0.999876	1	1	1	1	1	1
620.04954_24.199_8.38	0.222318	0.0933698	0.9934	0.805277	0.607414	0.973338	0.185039	0.585556	0.861717	0.94968	0.349463	0.999876	1	1	1	1	1	1
561.63686_24.278_7.78	0.201441	0.00339869	0.32885	0.433498	0.366562	0.366562	0.0271083	0.0271083	1	0.94968	0.11271	0.999876	1	1	1	0.761906	1	1
589.35444_24.352_8.06	0.452879	0.537754	0.55143	0.773771	1	0.999996	0.80587	0.816647	0.999997	0.94968	0.738409	0.999876	1	1	1	1	1	1
753.45798_24.240_9.59	0.710964	0.0371274	0.817343	0.983222	0.508764	0.508764	0.306428	0.306428	1	0.96328	0.257814	0.999876	1	1	1	1	1	1
560.34154_24.277_7.74	0.0673731	0.618626	0.116537	0.0900115	0.830974	0.830343	0.4493	0.450042	1	0.897888	0.80096	0.999876	1	1	1	1	1	1
654.39433_24.292_8.79	0.799959	0.34909	0.814706	0.988432	0.958215	0.947171	0.845973	0.824096	0.999972	0.96328	0.607446	0.999876	1	1	1	1	1	1
519.59912_24.186_7.68	0.495037	0.157269	0.711494	0.995251	0.574517	0.939789	0.420954	0.84812	0.896558	0.94968	0.407888	0.999876	1	1	1	1	1	1
625.24041_24.442_8.51	0.558923	0.152522	0.659774	0.999501	0.536458	0.91526	0.447634	0.864648	0.901028	0.94968	0.40729	0.999876	1	1	1	1	1	1
625.38393_24.438_8.47	0.56218	0.139412	0.694417	0.999061	0.535202	0.898449	0.433225	0.831336	0.916089	0.94968	0.402773	0.999876	1	1	1	1	1	1
605.19914_24.160_8.27	0.210332	0.0687827	0.909514	0.75101	0.590995	0.949745	0.150748	0.465659	0.893434	0.94968	0.307824	0.999876	1	1	1	1	1	1
651.39332_24.285_8.60	0.433729	0.52588	0.530656	0.748566	0.999999	0.999991	0.789088	0.798322	0.999998	0.94968	0.726301	0.999876	1	1	1	1	1	1
668.24057_24.324_8.92	0.263717	0.0835227	0.953188	0.862761	0.560028	0.947152	0.194156	0.580081	0.877083	0.94968	0.321901	0.999876	1	1	1	1	1	1
599.19825_24.138_8.17	0.928768	0.138825	0.457808	0.981569	0.949181	0.603238	0.801916	0.379828	0.901713	0.96328	0.402773	0.999876	1	1	1	1	1	1
686.41709_24.367_9.04	0.522494	0.142694	0.715095	0.996946	0.552823	0.916678	0.41687	0.826569	0.909362	0.94968	0.402773	0.999876	1	1	1	1	1	1
693.02002_24.084_9.08	0.725402	0.03743	0.830133	0.986453	0.503518	0.503518	0.312884	0.312884	1	0.96328	0.257814	0.999876	1	1	1	1	1	1
580.18854_24.072_7.95	0.833254	0.139429	0.528706	0.996876	0.92491	0.559916	0.83815	0.422727	0.905039	0.96328	0.402773	0.999876	1	1	1	1	1	1
587.08001_24.347_8.03	0.520725	0.160201	0.683103	0.997912	0.562363	0.934681	0.438027	0.864023	0.895357	0.94968	0.407888	0.999876	1	1	1	1	1	1
534.60962_24.218_7.67	0.450923	0.140285	0.793774	0.98326	0.593745	0.937694	0.377269	0.78552	0.910526	0.94968	0.402773	0.999876	1	1	1	1	1	1
598.64863_24.379_8.23	0.883691	0.33261	0.876527	0.997779	0.936469	0.918814	0.865215	0.838957	0.999945	0.96328	0.595857	0.999876	1	1	1	1	1	1
580.50487_24.332_7.96	0.450548	0.169869	0.733813	0.988913	0.606781	0.96106	0.411904	0.853883	0.885832	0.94968	0.414428	0.999876	1	1	1	1	1	1
595.07236_24.389_8.32	0.174966	0.95686	0.259335	0.293515	0.850316	0.833957	0.810699	0.828655	0.999986	0.94968	0.982377	0.999876	1	1	1	1	1	1
587.21668_24.349_8.05	0.535582	0.183244	0.624089	0.999527	0.5603	0.948843	0.471991	0.910917	0.874722	0.94968	0.431073	0.999876	1	1	1	1	1	1
591.21358_24.371_8.20	0.845003	0.356345	0.960422	0.998709	0.922925	0.943184	0.857915	0.887303	0.999905	0.96328	0.613452	0.999876	1	1	1	1	1	1
659.74490_24.296_8.78	0.212784	0.286133	0.939149	0.751631	0.891197	0.999776	0.368821	0.829483	0.873446	0.94968	0.556853	0.999876	1	1	1	1	1	1
641.88694_24.258_8.55	0.786715	0.36821	0.856906	0.990541	0.955164	0.958312	0.849017	0.855277	0.999999	0.96328	0.620601	0.999876	1	1	1	1	1	1
568.21419_24.289_7.79	0.981009	0.439864	0.889495	0.999784	0.968934	0.939672	0.946746	0.90685	0.999433	0.988292	0.662565	0.999876	1	1	1	1	1	1
597.02719_24.134_8.06	0.0720444	0.0271749	0.641068	0.360368	0.544936	0.961249	0.0402682	0.199762	0.842013	0.899616	0.257814	0.999876	1	1	1	0.864096	1	1
565.76889_24.293_7.80	0.284438	0.0605363	0.982071	0.858795	0.523641	0.891088	0.172434	0.473775	0.915782	0.94968	0.304177	0.999876	1	1	1	1	1	1
577.55508_23.601_7.84	0.396905	0.126469	0.111712	0.354893	0.99967	0.891655	0.461373	0.133368	0.869188	0.94968	0.402114	0.999876	1	1	1	1	1	1
631.71571_24.234_8.52	0.203277	0.338279	0.310085	0.37778	0.999864	0.999491	0.471497	0.494676	0.99998	0.94968	0.599982	0.999876	1	1	1	1	1	1
634.72292_24.242_8.59	0.549099	0.216403	0.553622	0.846391	0.966969	0.941414	0.611887	0.547343	0.999628	0.94968	0.481046	0.999876	1	1	1	1	1	1
681.92407_24.348_8.95	0.751567	0.378681	0.88173	0.98903	0.952987	0.968964	0.837958	0.87161	0.999881	0.96328	0.625724	0.999876	1	1	1	1	1	1
616.71151_24.185_8.31	0.540429	0.242319	0.659127	0.884975	0.95304	0.960481	0.623302	0.642572	0.99999	0.94968	0.509687	0.999876	1	1	1	1	1	1
689.09604_24.365_9.11	0.732732	0.343314	0.866522	0.985717	0.943654	0.961468	0.806159	0.842412	0.999884	0.96328	0.604402	0.999876	1	1	1	1	1	1
556.62440_24.263_7.73	0.853111	0.300726	0.956496	0.998921	0.894228	0.913335	0.82284	0.848394	0.999956	0.96328	0.570639	0.999876	1	1	1	1	1	1
538.18268_24.239_7.82	0.223518	0.0858856	0.987907	0.799496	0.598387	0.966009	0.177271	0.555947	0.871169	0.94968	0.329671	0.999876	1	1	1	1	1	1
674.20943_24.042_8.90	0.80789	0.0736712	0.280537	0.829731	0.951276	0.569279	0.550299	0.178898	0.877054	0.96328	0.307824	0.999876	1	1	1	1	1	1
551.33245_24.272_7.86	0.050423	0.0287296	0.570205	0.265656	0.601074	0.98575	0.0331173	0.18369	0.819863	0.847723	0.257814	0.999876	1	1	1	0.828515	1	1
591.50300_24.365_8.17	0.508332	0.17934	0.672009	0.876537	0.908386	0.933389	0.522713	0.568296	0.999865	0.94968	0.424463	0.999876	1	1	1	1	1	1
340.47862_13.743_5.12	0.784989	0.0384444	0.882548	0.995463	0.481159	0.481159	0.338943	0.338943	1	0.96328	0.257814	0.999876	1	1	1	1	1	1
562.91405_24.282_7.79	0.488353	0.253404	0.60069	0.831668	0.970873	0.974815	0.606855	0.620352	0.999997	0.94968	0.522943	0.999876	1	1	1	1	1	1
653.89633_24.287_8.77	0.484891	0.217585	0.603542	0.832518	0.955398	0.961477	0.563597	0.579637	0.999994	0.94968	0.482921	0.999876	1	1	1	1	1	1
647.99641_23.929_8.62	0.748257	0.375562	0.868351	0.987489	0.955017	0.968423	0.835586	0.864515	0.999928	0.96328	0.624266	0.999876	1	1	1	1	1	1
620.79113_23.822_8.33	0.863141	0.37854	0.826723	0.994476	0.964807	0.943778	0.888112	0.849546	0.999795	0.96328	0.625724	0.999876	1	1	1	1	1	1
340.54230_13.743_5.12	0.784691	0.0384682	0.882275	0.995432	0.481427	0.481427	0.338937	0.338937	1	0.96328	0.257814	0.999876	1	1	1	1	1	1
585.21347_24.348_8.08	0.537275	0.237028	0.625966	0.870691	0.958883	0.957975	0.619222	0.616817	1	0.94968	0.503157	0.999876	1	1	1	1	1	1
556.85053_23.981_7.68	0.581967	0.261382	0.636633	0.895194	0.966235	0.95819	0.673172	0.650746	0.999984	0.950159	0.531159	0.999876	1	1	1	1	1	1
340.93332_13.743_5.12	0.773818	0.0383108	0.872752	0.994242	0.48559	0.48559	0.334253	0.334253	1	0.96328	0.257814	0.999876	1	1	1	1	1	1
258.13388_7.936_5.06	0.0699385	0.636931	0.120065	0.0942475	0.828077	0.827092	0.466027	0.467196	1	0.899616	0.809865	0.999876	1	1	1	1	1	1
575.77866_24.318_7.95	0.952781	0.0154809	0.877641	0.994876	0.229177	0.229177	0.285975	0.285975	1	0.96995	0.201605	0.999876	1	1	1	1	1	1
499.26247_4.124_7.36	0.685373	0.00477826	0.824194	0.985008	0.188132	0.188132	0.0935563	0.0935563	1	0.96328	0.126641	0.999876	1	1	1	1	1	1
617.04058_24.195_8.41	0.864478	0.0699181	0.411355	0.961359	0.245199	0.620278	0.416006	0.843988	0.896395	0.96328	0.307824	0.999876	1	1	1	1	1	1
703.60398_24.395_9.27	0.783028	0.0144026	0.733908	0.949797	0.177215	0.177215	0.332451	0.332451	1	0.96328	0.201605	0.999876	1	1	1	1	1	1
591.86086_24.114_8.12	0.979459	0.0654668	0.356806	0.908079	0.209671	0.550238	0.451318	0.865478	0.902684	0.987771	0.307824	0.999876	1	1	1	1	1	1
711.76774_24.414_9.36	0.838499	0.0145503	0.780521	0.971265	0.19175	0.19175	0.314407	0.314407	1	0.96328	0.201605	0.999876	1	1	1	1	1	1
562.63177_24.275_7.75	0.601228	0.0253062	0.633245	1	0.206348	0.521764	0.18012	0.488566	0.915906	0.953232	0.257814	0.999876	1	1	1	1	1	1
610.69827_24.180_8.37	0.796569	0.0789309	0.435042	0.979578	0.275223	0.682545	0.409971	0.85231	0.885745	0.96328	0.312654	0.999876	1	1	1	1	1	1
600.36840_24.387_8.23	0.78385	0.0900281	0.419407	0.979111	0.287729	0.721058	0.428133	0.883514	0.871382	0.96328	0.34008	0.999876	1	1	1	1	1	1
580.64991_24.327_7.95	0.961694	0.0571027	0.356709	0.885206	0.193277	0.489833	0.452823	0.841507	0.920664	0.976068	0.301006	0.999876	1	1	1	1	1	1
607.50958_24.408_8.37	0.810873	0.0689872	0.459077	0.981141	0.266887	0.641514	0.393694	0.812803	0.903746	0.96328	0.307824	0.999876	1	1	1	1	1	1
657.73176_24.301_8.81	0.826926	0.241007	0.810179	0.98211	0.739118	0.742316	0.889158	0.891512	1	0.96328	0.508773	0.999876	1	1	1	1	1	1
199.10235_25.349_4.34	0.880522	0.0150362	0.816281	0.982934	0.206155	0.206155	0.305151	0.305151	1	0.96328	0.201605	0.999876	1	1	1	1	1	1
586.35980_23.659_7.97	0.741371	0.253817	0.734712	0.952927	0.711343	0.716819	0.922222	0.92548	1	0.96328	0.52304	0.999876	1	1	1	1	1	1
584.64269_24.344_8.00	0.916241	0.166147	0.88283	0.995617	0.684909	0.686026	0.780583	0.781642	1	0.96328	0.41069	0.999876	1	1	1	1	1	1
583.77676_24.340_8.01	0.83446	0.0860956	0.39005	0.963	0.264605	0.686868	0.440321	0.891577	0.872379	0.96328	0.330033	0.999876	1	1	1	1	1	1
597.36025_24.387_8.25	0.876312	0.16338	0.785686	0.984673	0.626797	0.667033	0.7869	0.822953	0.999899	0.96328	0.410177	0.999876	1	1	1	1	1	1
290.24811_22.801_6.30	0.935755	0.0151657	0.862946	0.992822	0.221893	0.221893	0.288404	0.288404	1	0.96328	0.201605	0.999876	1	1	1	1	1	1
219.17466_22.487_6.76	0.878052	0.0145446	0.813721	0.982225	0.201659	0.201659	0.300991	0.300991	1	0.96328	0.201605	0.999876	1	1	1	1	1	1
548.75432_24.244_7.66	0.514104	0.0648122	0.800955	0.9762	0.638047	0.26075	0.824611	0.400725	0.900292	0.94968	0.30705	0.999876	1	1	1	1	1	1
599.51781_24.382_8.22	0.991307	0.142606	0.948935	0.999755	0.683371	0.690392	0.705126	0.712325	0.999999	0.995707	0.402773	0.999876	1	1	1	1	1	1
219.31239_22.493_5.12	0.886602	0.0151622	0.821516	0.984326	0.208724	0.208724	0.304378	0.304378	1	0.96328	0.201605	0.999876	1	1	1	1	1	1
574.63686_24.318_7.91	0.577362	0.0346689	0.585598	1	0.227098	0.608069	0.203454	0.584333	0.885397	0.950159	0.257814	0.999876	1	1	1	1	1	1
668.40440_24.323_8.92	0.835388	0.224001	0.784439	0.979887	0.706422	0.728734	0.870385	0.887259	0.999981	0.96328	0.492106	0.999876	1	1	1	1	1	1
390.23418_19.039_6.80	0.905268	0.0150488	0.837118	0.988032	0.212749	0.212749	0.297103	0.297103	1	0.96328	0.201605	0.999876	1	1	1	1	1	1
580.79147_24.329_7.97	0.776272	0.314455	0.733806	0.962266	0.767424	0.792516	0.942701	0.955496	0.999966	0.96328	0.581223	0.999876	1	1	1	1	1	1
218.12845_25.349_7.11	0.859198	0.0146897	0.798026	0.977463	0.198	0.198	0.308796	0.308796	1	0.96328	0.201605	0.999876	1	1	1	1	1	1
658.39977_24.304_8.82	0.718696	0.116507	0.878492	0.987901	0.727683	0.769575	0.52601	0.572024	0.999861	0.96328	0.39557	0.999876	1	1	1	1	1	1
650.39446_24.286_8.75	0.842876	0.246977	0.735836	0.974583	0.704769	0.761028	0.882075	0.920843	0.99968	0.96328	0.517164	0.999876	1	1	1	1	1	1
462.36852_25.622_7.82	0.852832	0.014728	0.79272	0.975685	0.196687	0.196687	0.311354	0.311354	1	0.96328	0.201605	0.999876	1	1	1	1	1	1
601.22004_24.403_8.34	0.484433	0.0716121	0.483874	0.70816	0.284957	0.295055	0.792608	0.805459	0.999996	0.94968	0.307824	0.999876	1	1	1	1	1	1
269.10001_12.710_5.05	0.421401	0.0304326	0.756762	0.985878	0.275555	0.672075	0.1477	0.459905	0.892804	0.94968	0.257814	0.999876	1	1	1	1	1	1
693.75536_24.381_9.19	0.894667	0.0148329	0.827981	0.98594	0.208239	0.208239	0.298433	0.298433	1	0.96328	0.201605	0.999876	1	1	1	1	1	1
719.23547_24.145_9.32	0.842538	0.0143016	0.783659	0.972448	0.190848	0.190848	0.310388	0.310388	1	0.96328	0.201605	0.999876	1	1	1	1	1	1
698.08900_24.383_9.22	0.822111	0.014514	0.766746	0.965695	0.187442	0.187442	0.319712	0.319712	1	0.96328	0.201605	0.999876	1	1	1	1	1	1
690.25383_24.370_9.14	0.875564	0.0145266	0.811611	0.981627	0.200882	0.200882	0.301631	0.301631	1	0.96328	0.201605	0.999876	1	1	1	1	1	1
704.26291_24.400_9.29	0.84275	0.0143161	0.783852	0.972519	0.191013	0.191013	0.310471	0.310471	1	0.96328	0.201605	0.999876	1	1	1	1	1	1
753.06603_24.224_9.63	0.915569	0.0144595	0.845211	0.989706	0.210692	0.210692	0.287938	0.287938	1	0.96328	0.201605	0.999876	1	1	1	1	1	1
606.53682_24.162_8.22	0.550065	0.0562998	0.81534	0.980617	0.598811	0.255194	0.775684	0.379676	0.917957	0.94968	0.301006	0.999876	1	1	1	1	1	1
558.61624_24.271_7.70	0.795259	0.0149454	0.744669	0.955426	0.184047	0.184047	0.333902	0.333902	1	0.96328	0.201605	0.999876	1	1	1	1	1	1
752.86850_24.224_9.64	0.877862	0.0142512	0.813264	0.982097	0.199279	0.199279	0.298028	0.298028	1	0.96328	0.201605	0.999876	1	1	1	1	1	1
761.67370_24.245_9.71	0.788008	0.0139786	0.737655	0.951804	0.175308	0.175308	0.325926	0.325926	1	0.96328	0.201605	0.999876	1	1	1	1	1	1
752.66827_24.223_9.63	0.823673	0.0141975	0.76774	0.966118	0.185441	0.185441	0.31576	0.31576	1	0.96328	0.201605	0.999876	1	1	1	1	1	1
656.56083_24.296_8.80	0.866665	0.0144817	0.80409	0.979389	0.198271	0.198271	0.304132	0.304132	1	0.96328	0.201605	0.999876	1	1	1	1	1	1
572.91966_24.310_7.87	0.836873	0.0616865	0.466704	0.978216	0.254187	0.601041	0.385757	0.785642	0.915876	0.96328	0.306288	0.999876	1	1	1	1	1	1
686.57961_24.377_9.13	0.904126	0.0146136	0.835726	0.987728	0.208951	0.208951	0.293155	0.293155	1	0.96328	0.201605	0.999876	1	1	1	1	1	1
612.70953_24.178_8.22	0.779809	0.0652787	0.494587	0.989519	0.275867	0.642489	0.372757	0.780123	0.910886	0.96328	0.307824	0.999876	1	1	1	1	1	1
599.79494_24.382_8.19	0.996661	0.0582583	0.38033	0.912259	0.206445	0.512888	0.439806	0.829638	0.920968	0.998762	0.302646	0.999876	1	1	1	1	1	1
710.63044_24.129_9.25	0.784489	0.0709494	0.469916	0.986255	0.276528	0.661286	0.387723	0.811868	0.900372	0.96328	0.307824	0.999876	1	1	1	1	1	1
625.04443_24.216_8.37	0.767671	0.0701025	0.492432	0.990604	0.285869	0.665755	0.380049	0.796082	0.905692	0.96328	0.307824	0.999876	1	1	1	1	1	1
694.08438_24.394_9.20	0.742291	0.0724906	0.494477	0.993032	0.29222	0.687046	0.374438	0.801672	0.898146	0.96328	0.307824	0.999876	1	1	1	1	1	1
744.06350_24.203_9.55	0.818023	0.013912	0.762717	0.963947	0.181916	0.181916	0.3146	0.3146	1	0.96328	0.201605	0.999876	1	1	1	1	1	1
744.26133_24.203_9.55	0.89357	0.0142941	0.826517	0.985585	0.203629	0.203629	0.29334	0.29334	1	0.96328	0.201605	0.999876	1	1	1	1	1	1
618.95078_24.427_8.43	0.861684	0.0706856	0.414991	0.962969	0.248558	0.623989	0.417296	0.843819	0.89738	0.96328	0.307824	0.999876	1	1	1	1	1	1
696.92543_24.385_9.21	0.814761	0.0647637	0.47053	0.98223	0.26308	0.623794	0.38494	0.793202	0.910736	0.96328	0.30705	0.999876	1	1	1	1	1	1
704.42984_24.398_9.28	0.901327	0.0600903	0.4264	0.956513	0.231683	0.564539	0.406193	0.805821	0.916183	0.96328	0.303861	0.999876	1	1	1	1	1	1
709.03747_24.121_9.22	0.820711	0.0139718	0.76503	0.964957	0.183015	0.183015	0.314327	0.314327	1	0.96328	0.201605	0.999876	1	1	1	1	1	1
743.86298_24.203_9.55	0.817515	0.0143587	0.762741	0.963957	0.185161	0.185161	0.319653	0.319653	1	0.96328	0.201605	0.999876	1	1	1	1	1	1
642.05861_24.260_8.58	0.536161	0.0302918	0.652322	0.999628	0.235008	0.599444	0.179024	0.515458	0.899064	0.94968	0.257814	0.999876	1	1	1	1	1	1
682.02429_24.047_8.96	0.507111	0.0721931	0.769671	0.979452	0.679646	0.273215	0.850312	0.40769	0.885746	0.94968	0.307824	0.999876	1	1	1	1	1	1
696.59915_24.381_9.19	0.860622	0.0638994	0.444272	0.969814	0.248547	0.598502	0.400918	0.806717	0.912375	0.96328	0.306288	0.999876	1	1	1	1	1	1
689.42425_24.367_9.07	0.890649	0.0593909	0.437894	0.961941	0.235453	0.566431	0.400366	0.796153	0.918545	0.96328	0.303861	0.999876	1	1	1	1	1	1
612.57286_23.831_8.36	0.9384	0.0149451	0.864962	0.993131	0.220798	0.220798	0.28545	0.28545	1	0.96418	0.201605	0.999876	1	1	1	1	1	1
581.78242_24.337_8.02	0.280363	0.00996026	0.860592	0.919792	0.175611	0.54502	0.0528813	0.231048	0.863536	0.94968	0.201605	0.999876	1	1	1	1	1	1
571.19789_24.304_7.83	0.537078	0.063191	0.793955	0.981349	0.636375	0.266419	0.807562	0.392373	0.906365	0.94968	0.306288	0.999876	1	1	1	1	1	1
592.52746_24.124_8.14	0.748067	0.215711	0.78587	0.964037	0.697507	0.672731	0.897218	0.879595	0.999975	0.96328	0.479882	0.999876	1	1	1	1	1	1
735.25784_24.183_9.48	0.902861	0.0151463	0.835185	0.987608	0.212887	0.212887	0.298848	0.298848	1	0.96328	0.201605	0.999876	1	1	1	1	1	1
628.38152_24.228_8.52	0.525538	0.0574871	0.835748	0.973088	0.59198	0.249029	0.792307	0.393113	0.916439	0.94968	0.301006	0.999876	1	1	1	1	1	1
726.84316_24.183_9.36	0.822421	0.01424	0.766734	0.96569	0.185459	0.185459	0.316655	0.316655	1	0.96328	0.201605	0.999876	1	1	1	1	1	1
735.64841_24.202_9.43	0.858729	0.0665671	0.42895	0.966822	0.246928	0.610309	0.405948	0.824131	0.904069	0.96328	0.307824	0.999876	1	1	1	1	1	1
542.83386_23.931_7.57	0.508706	0.0671858	0.793444	0.976284	0.650278	0.263628	0.834777	0.404427	0.895458	0.94968	0.307824	0.999876	1	1	1	1	1	1
551.47543_24.258_7.74	0.684472	0.026266	0.664379	0.999492	0.524009	0.19637	0.552766	0.20315	0.904012	0.96328	0.257814	0.999876	1	1	1	1	1	1
557.34064_24.021_7.92	0.865121	0.0988054	0.339678	0.939368	0.257068	0.708131	0.47756	0.935281	0.848816	0.96328	0.35988	0.999876	1	1	1	1	1	1
735.45478_24.184_9.47	0.795564	0.0676436	0.469629	0.984747	0.269121	0.644263	0.383935	0.802533	0.904085	0.96328	0.307824	0.999876	1	1	1	1	1	1
525.74577_24.211_7.78	0.816294	0.0814002	0.411604	0.971715	0.267638	0.681331	0.422774	0.87078	0.879219	0.96328	0.317542	0.999876	1	1	1	1	1	1
534.75470_24.213_7.63	0.86315	0.0570651	0.464965	0.973298	0.242466	0.569412	0.383302	0.770668	0.923026	0.96328	0.301006	0.999876	1	1	1	1	1	1
726.64911_24.162_9.39	0.547659	0.0669913	0.759588	0.986932	0.6688	0.278739	0.815783	0.387803	0.897718	0.94968	0.307824	0.999876	1	1	1	1	1	1
631.38625_24.229_8.43	0.946396	0.19998	0.764907	0.990629	0.666264	0.755387	0.796419	0.873182	0.998798	0.967774	0.456274	0.999876	1	1	1	1	1	1
744.65313_24.220_9.52	0.464857	0.0306541	0.70246	0.995268	0.255493	0.646203	0.159744	0.490095	0.890254	0.94968	0.257814	0.999876	1	1	1	1	1	1
594.36117_24.372_8.17	0.923587	0.0260262	0.490087	0.990047	0.634698	0.264509	0.443693	0.149585	0.90567	0.96328	0.257814	0.999876	1	1	1	1	1	1
544.04404_24.226_7.57	0.766656	0.236615	0.733684	0.958557	0.692265	0.711077	0.902393	0.914614	0.999989	0.96328	0.503157	0.999876	1	1	1	1	1	1
686.74657_24.382_9.13	0.806798	0.204484	0.794663	0.976483	0.688682	0.689116	0.865384	0.865722	1	0.96328	0.463788	0.999876	1	1	1	1	1	1
525.88865_24.207_7.72	0.760024	0.0814035	0.457728	0.987822	0.292021	0.70719	0.400937	0.845253	0.884983	0.96328	0.317542	0.999876	1	1	1	1	1	1
718.03666_24.170_9.27	0.506779	0.0678774	0.788163	0.976675	0.655533	0.264149	0.838122	0.403988	0.89266	0.94968	0.307824	0.999876	1	1	1	1	1	1
608.38158_24.157_8.22	0.85091	0.0089129	0.291996	0.874006	0.579529	0.187973	0.213149	0.0464435	0.856466	0.96328	0.201605	0.999876	1	1	1	1	1	1
568.34697_24.306_7.91	0.797447	0.192541	0.674048	0.952005	0.60338	0.675828	0.847373	0.900912	0.999413	0.96328	0.443817	0.999876	1	1	1	1	1	1
683.57990_24.352_9.06	0.483765	0.0269183	0.720174	0.995877	0.244708	0.603546	0.154616	0.45398	0.905975	0.94968	0.257814	0.999876	1	1	1	1	1	1
683.21662_24.047_8.97	0.72008	0.033806	0.553986	0.999981	0.646043	0.234927	0.597944	0.196829	0.868692	0.96328	0.257814	0.999876	1	1	1	1	1	1
588.78287_24.377_8.28	0.882143	0.240429	0.847005	0.991688	0.75777	0.766621	0.870342	0.877484	0.999999	0.96328	0.507929	0.999876	1	1	1	1	1	1
559.62377_24.290_7.90	0.930516	0.0622369	0.399555	0.940789	0.22371	0.559827	0.423423	0.829654	0.911332	0.96328	0.306288	0.999876	1	1	1	1	1	1
594.93097_24.386_8.30	0.845434	0.0115801	0.340546	0.934195	0.069807	0.282654	0.152921	0.524833	0.856719	0.96328	0.201605	0.999876	1	1	1	1	1	1
597.79348_24.379_8.24	0.830008	0.228059	0.777656	0.978227	0.707311	0.731171	0.87538	0.893053	0.999976	0.96328	0.496879	0.999876	1	1	1	1	1	1
679.07942_24.352_9.04	0.844983	0.162115	0.841115	0.986663	0.65595	0.645155	0.805446	0.795679	0.999998	0.96328	0.408077	0.999876	1	1	1	1	1	1
597.64806_24.382_8.21	0.555949	0.0290734	0.634916	0.999921	0.223464	0.579101	0.180202	0.516713	0.899705	0.94968	0.257814	0.999876	1	1	1	1	1	1
594.50473_24.365_8.15	0.190826	0.0114847	0.981051	0.791774	0.226651	0.669079	0.0431299	0.211528	0.84206	0.94968	0.201605	0.999876	1	1	1	0.897858	1	1
637.99853_23.891_8.50	0.512863	0.0675187	0.793033	0.977194	0.651608	0.266198	0.833405	0.405234	0.897014	0.94968	0.307824	0.999876	1	1	1	1	1	1
579.20489_24.330_7.96	0.848229	0.115341	0.907131	0.99824	0.710227	0.702659	0.592762	0.58467	0.999999	0.96328	0.394535	0.999876	1	1	1	1	1	1
717.84358_24.139_9.31	0.491141	0.0282875	0.690844	0.997499	0.240407	0.611353	0.159998	0.479688	0.897161	0.94968	0.257814	0.999876	1	1	1	1	1	1
614.37355_24.187_8.36	0.505595	0.0340192	0.646413	0.999112	0.248019	0.645338	0.180509	0.543811	0.883316	0.94968	0.257814	0.999876	1	1	1	1	1	1
638.59591_23.913_8.55	0.823017	0.206889	0.848662	0.985446	0.72105	0.697417	0.865276	0.846016	0.999978	0.96328	0.46792	0.999876	1	1	1	1	1	1
726.25264_24.162_9.39	0.569797	0.0785639	0.69955	0.994309	0.737554	0.31283	0.838683	0.390886	0.8829	0.949956	0.312067	0.999876	1	1	1	1	1	1
537.18779_24.201_7.50	0.805925	0.112025	0.844558	0.993438	0.736726	0.713757	0.569239	0.54452	0.999979	0.96328	0.385863	0.999876	1	1	1	1	1	1
621.58046_23.845_8.39	0.933186	0.223659	0.889002	0.997023	0.761377	0.770151	0.838016	0.84589	0.999999	0.96328	0.492106	0.999876	1	1	1	1	1	1
636.38647_24.248_8.57	0.896867	0.125613	0.945366	0.999726	0.709662	0.700737	0.635516	0.625971	0.999999	0.96328	0.402114	0.999876	1	1	1	1	1	1
599.69850_24.143_8.19	0.505018	0.0356767	0.627278	0.9994	0.24695	0.657533	0.184185	0.565434	0.874048	0.94968	0.257814	0.999876	1	1	1	1	1	1
570.34295_24.303_7.87	0.84183	0.0998124	0.9386	0.998859	0.659909	0.673027	0.552388	0.566023	0.999996	0.96328	0.35988	0.999876	1	1	1	1	1	1
653.56564_24.289_8.77	0.506789	0.0017223	0.541736	0.999997	0.0337795	0.157193	0.0277422	0.139938	0.851091	0.94968	0.0654932	0.999876	1	1	1	0.761906	1	1
606.22791_24.397_8.29	0.848397	0.105118	0.95296	0.999221	0.664132	0.682927	0.566382	0.586068	0.999989	0.96328	0.369383	0.999876	1	1	1	1	1	1
638.88969_24.252_8.62	0.846336	0.121961	0.94784	0.999041	0.701485	0.719449	0.600625	0.619924	0.99999	0.96328	0.402114	0.999876	1	1	1	1	1	1
603.18074_23.740_8.12	0.753728	0.236427	0.841428	0.974713	0.750691	0.697399	0.913914	0.87628	0.999735	0.96328	0.503157	0.999876	1	1	1	1	1	1
643.89057_24.268_8.64	0.921741	0.1011	0.939634	0.999891	0.662314	0.634486	0.598606	0.56965	0.999967	0.96328	0.361114	0.999876	1	1	1	1	1	1
644.90184_24.259_8.62	0.864138	0.108165	0.927482	0.999101	0.684522	0.680125	0.58428	0.579651	1	0.96328	0.375743	0.999876	1	1	1	1	1	1
674.01072_24.055_8.91	0.472893	0.0297231	0.703448	0.995841	0.251678	0.633814	0.159492	0.483131	0.894332	0.94968	0.257814	0.999876	1	1	1	1	1	1
691.82007_24.090_9.05	0.516757	0.0306935	0.652112	0.9993	0.236626	0.614907	0.174019	0.518383	0.891131	0.94968	0.257814	0.999876	1	1	1	1	1	1
590.86830_24.111_8.07	0.974107	0.274094	0.86637	0.998003	0.799623	0.838958	0.861459	0.895742	0.999839	0.983754	0.544648	0.999876	1	1	1	1	1	1
561.67367_24.062_8.10	0.837598	0.131766	0.90403	0.997703	0.742303	0.739811	0.618898	0.616149	1	0.96328	0.402773	0.999876	1	1	1	1	1	1
691.42673_24.077_9.05	0.880624	0.105917	0.953442	0.99967	0.665631	0.668031	0.58565	0.588162	1	0.96328	0.370076	0.999876	1	1	1	1	1	1
564.05385_24.289_7.82	0.922775	0.135521	0.972824	0.999969	0.712888	0.707817	0.664753	0.659349	1	0.96328	0.402773	0.999876	1	1	1	1	1	1
709.23123_24.148_9.20	0.798159	0.200328	0.820208	0.978537	0.697539	0.677498	0.867059	0.851116	0.999987	0.96328	0.456486	0.999876	1	1	1	1	1	1
616.87637_24.192_8.37	0.806621	0.227981	0.779904	0.974703	0.708462	0.71901	0.884531	0.892177	0.999998	0.96328	0.496879	0.999876	1	1	1	1	1	1
726.45254_24.161_9.39	0.883883	0.204264	0.84625	0.991471	0.716557	0.725278	0.836826	0.844317	0.999999	0.96328	0.463788	0.999876	1	1	1	1	1	1
665.01141_24.000_8.80	0.794163	0.22414	0.841769	0.981057	0.737486	0.704242	0.890721	0.865456	0.999936	0.96328	0.492106	0.999876	1	1	1	1	1	1
666.91441_24.315_8.85	0.794812	0.134982	0.894679	0.995258	0.752579	0.766184	0.601941	0.617267	0.999995	0.96328	0.402773	0.999876	1	1	1	1	1	1
580.85416_24.075_7.94	0.580883	0.0680974	0.728329	0.933169	0.690218	0.714805	0.354627	0.376295	0.999975	0.950159	0.307824	0.999876	1	1	1	1	1	1
623.05721_24.200_8.38	0.802341	0.105331	0.916847	0.99688	0.684122	0.705243	0.545391	0.56762	0.999985	0.96328	0.369501	0.999876	1	1	1	1	1	1
668.90446_24.320_8.91	0.829431	0.0404241	0.748111	0.967479	0.315332	0.334726	0.498909	0.524373	0.999975	0.96328	0.262619	0.999876	1	1	1	1	1	1
647.59195_23.978_8.70	0.512716	0.0351669	0.62427	0.999573	0.243848	0.649509	0.18513	0.564062	0.876161	0.94968	0.257814	0.999876	1	1	1	1	1	1
652.40708_24.278_8.71	0.835892	0.106512	0.91764	0.998182	0.686265	0.690493	0.566288	0.570739	1	0.96328	0.37126	0.999876	1	1	1	1	1	1
717.64768_24.139_9.31	0.863381	0.123284	0.905786	0.998602	0.726205	0.710906	0.616975	0.600438	0.999994	0.96328	0.402114	0.999876	1	1	1	1	1	1
614.54003_24.190_8.40	0.892865	0.107169	0.981622	0.999916	0.653099	0.666225	0.592087	0.605817	0.999996	0.96328	0.372739	0.999876	1	1	1	1	1	1
566.05659_24.308_7.96	0.945428	0.0520523	0.816343	0.99213	0.39068	0.430692	0.49754	0.543505	0.999856	0.967441	0.291696	0.999876	1	1	1	1	1	1
683.41331_24.353_9.07	0.596359	0.04563	0.732857	0.941668	0.600084	0.614956	0.294913	0.306157	0.999995	0.953232	0.282362	0.999876	1	1	1	1	1	1
545.04291_24.250_7.79	0.561292	0.0399653	0.728654	0.92924	0.574048	0.606417	0.260349	0.283188	0.999948	0.94968	0.261425	0.999876	1	1	1	1	1	1
665.40380_24.014_8.83	0.782932	0.10556	0.941143	0.996912	0.671502	0.717291	0.532696	0.58089	0.999842	0.96328	0.369803	0.999876	1	1	1	1	1	1
623.22011_24.199_8.34	0.742286	0.0453875	0.623428	0.912241	0.279539	0.324865	0.556873	0.621286	0.999633	0.96328	0.282362	0.999876	1	1	1	1	1	1
557.05177_24.283_7.88	0.631821	0.0513875	0.706313	0.945472	0.641423	0.619048	0.332791	0.314993	0.999983	0.96328	0.290212	0.999876	1	1	1	1	1	1
621.04373_24.206_8.38	0.893743	0.162048	0.969933	0.999823	0.756073	0.765395	0.692598	0.702861	0.999998	0.96328	0.408077	0.999876	1	1	1	1	1	1
646.89174_24.266_8.69	0.832045	0.015279	0.937094	0.999312	0.293977	0.293641	0.221835	0.221551	1	0.96328	0.201605	0.999876	1	1	1	1	1	1
727.04161_24.178_9.37	0.826262	0.0425382	0.777657	0.972005	0.336754	0.340913	0.514248	0.519581	1	0.96328	0.271349	0.999876	1	1	1	1	1	1
575.06867_24.315_7.91	0.789995	0.0184875	0.99927	0.999431	0.297163	0.344501	0.227026	0.267984	0.999629	0.96328	0.231255	0.999876	1	1	1	1	1	1
709.43100_24.139_9.21	0.844341	0.0167756	0.89458	0.998805	0.325511	0.301522	0.240035	0.220085	0.999949	0.96328	0.214547	0.999876	1	1	1	1	1	1
724.56923_13.746_9.52	0.782997	0.0146218	0.734095	0.949898	0.178778	0.178778	0.334872	0.334872	1	0.96328	0.201605	0.999876	1	1	1	1	1	1
571.85440_24.060_7.97	0.578427	0.0488531	0.723335	0.93281	0.620435	0.640714	0.298089	0.313616	0.999987	0.950159	0.285859	0.999876	1	1	1	1	1	1
668.73856_24.320_8.92	0.901405	0.0176979	0.965822	0.999995	0.27795	0.29427	0.257456	0.273536	0.999981	0.96328	0.222354	0.999876	1	1	1	1	1	1
276.72756_13.743_5.33	0.389217	0.00301479	0.385152	0.532604	0.0334464	0.0334464	0.259241	0.259241	1	0.94968	0.10615	0.999876	1	1	1	1	1	1
582.35185_24.356_8.18	0.842352	0.0175132	0.995682	0.999923	0.287805	0.314064	0.237656	0.261528	0.999928	0.96328	0.221007	0.999876	1	1	1	1	1	1
636.55234_24.248_8.56	0.918953	0.0143331	0.997566	0.999999	0.262239	0.255657	0.238698	0.232325	0.999998	0.96328	0.201605	0.999876	1	1	1	1	1	1
572.01572_24.076_8.05	0.522733	0.0388711	0.621688	0.876503	0.632378	0.617599	0.248067	0.238465	0.999995	0.94968	0.257814	0.999876	1	1	1	1	1	1
615.88257_24.182_8.26	0.42818	0.05509	0.602308	0.808488	0.71875	0.756605	0.254317	0.282274	0.999901	0.94968	0.301006	0.999876	1	1	1	1	1	1
684.51883_13.748_9.24	0.87098	0.000109856	0.954185	0.999728	0.0115428	0.0115428	0.0102869	0.0102869	1	0.96328	0.0101067	0.999876	1	0.823003	0.671839	0.509206	0.752259	1
657.00195_23.956_8.71	0.310204	0.528132	0.00669638	0.0562146	0.303762	1	0.872539	0.0775209	0.34616	0.94968	0.728352	0.999876	1	1	1	1	1	1
363.25071_35.574_7.31	0.80741	0.993987	0.287596	0.802365	0.85823	0.999834	0.999991	0.866684	0.904391	0.96328	0.998706	0.999876	1	1	1	1	1	1
313.25611_25.973_5.88	0.442529	0.613502	0.0951277	0.32264	0.386754	0.866165	0.999975	0.823352	0.841642	0.94968	0.797994	0.999876	1	1	1	1	1	1
456.22989_33.496_7.26	0.773118	0.956669	0.259514	0.758934	0.813732	0.998809	1	0.865486	0.896347	0.96328	0.982377	0.999876	1	1	1	1	1	1
316.02430_7.613_5.26	0.876251	0.690632	0.503886	0.989104	0.996475	0.967174	0.999862	0.86788	0.919092	0.96328	0.838274	0.999876	1	1	1	1	1	1
565.67690_24.019_7.81	0.789068	0.947176	0.238727	0.747804	0.789015	0.999037	0.999996	0.852327	0.873967	0.96328	0.979103	0.999876	1	1	1	1	1	1
623.88244_24.205_8.24	0.815729	0.874376	0.565824	0.997192	0.989085	0.987558	0.998986	0.952213	0.928968	0.96328	0.950881	0.999876	1	1	1	1	1	1
288.28971_26.095_6.46	0.230535	0.0362151	0.863165	0.671058	0.347481	0.0991839	0.888209	0.442037	0.876875	0.94968	0.257814	0.999876	1	1	1	1	1	1
569.68084_24.055_7.96	0.838396	0.251302	0.609657	0.998954	0.968291	0.724784	0.929978	0.623444	0.940696	0.96328	0.520868	0.999876	1	1	1	1	1	1
647.40190_23.939_8.63	0.541138	0.522884	0.811546	0.986054	0.992118	0.793904	0.999991	0.917492	0.927382	0.94968	0.723564	0.999876	1	1	1	1	1	1
586.20058_24.089_7.99	0.545519	0.460492	0.848487	0.982218	0.979846	0.758453	0.99994	0.902849	0.939004	0.94968	0.677404	0.999876	1	1	1	1	1	1
621.17559_23.889_8.49	0.766225	0.0323907	0.126336	0.878332	0.964873	0.215909	0.645979	0.0560295	0.464356	0.96328	0.257814	0.999876	1	1	1	1	1	1
645.23466_24.259_8.58	0.861443	0.229807	0.608568	0.998395	0.959888	0.712213	0.909295	0.59773	0.945315	0.96328	0.496879	0.999876	1	1	1	1	1	1
621.37830_23.866_8.43	0.508187	0.414835	0.8429	0.975594	0.97126	0.702011	0.999887	0.877723	0.924687	0.94968	0.643694	0.999876	1	1	1	1	1	1
629.59610_23.859_8.41	0.64518	0.382448	0.849025	0.99348	0.961406	0.757784	0.993704	0.861126	0.962637	0.96328	0.627402	0.999876	1	1	1	1	1	1
629.98039_23.920_8.57	0.778315	0.273205	0.585839	0.999555	0.979507	0.715324	0.957367	0.632755	0.916532	0.96328	0.544556	0.999876	1	1	1	1	1	1
586.53031_24.106_8.07	0.745752	0.238731	0.716558	0.999948	0.935321	0.668962	0.942778	0.671158	0.950037	0.96328	0.505588	0.999876	1	1	1	1	1	1
691.23280_24.067_9.05	0.828729	0.212676	0.561701	0.998023	0.963479	0.671018	0.911358	0.54771	0.920135	0.96328	0.475727	0.999876	1	1	1	1	1	1
615.55127_24.178_8.30	0.63184	0.471139	0.765161	0.997104	0.990841	0.807675	0.999374	0.877926	0.939353	0.96328	0.685555	0.999876	1	1	1	1	1	1
601.04388_24.136_8.14	0.499654	0.134025	0.766408	0.980286	0.814922	0.384708	0.943357	0.546665	0.885347	0.94968	0.402773	0.999876	1	1	1	1	1	1
557.67649_23.986_7.70	0.992629	0.16256	0.404814	0.954322	0.977427	0.679861	0.805453	0.380936	0.900097	0.995939	0.408836	0.999876	1	1	1	1	1	1
637.56423_24.240_8.56	0.763992	0.038217	0.541858	0.999663	0.67994	0.267234	0.600315	0.207319	0.879756	0.96328	0.257814	0.999876	1	1	1	1	1	1
624.71277_24.210_8.46	0.817692	0.0507741	0.61249	0.999761	0.695217	0.338716	0.622325	0.273752	0.928134	0.96328	0.289297	0.999876	1	1	1	1	1	1
451.16467_25.755_7.28	0.0825006	0.312385	0.33039	0.85639	1	0.19391	0.877713	0.489225	0.230033	0.899616	0.579423	0.999876	1	1	1	1	1	1
219.99078_32.545_4.28	0.112903	0.0474454	0.0553319	1	1	0.049893	1	0.0402953	0.0657023	0.94968	0.283448	0.999876	1	1	1	1	1	1
543.83173_23.932_7.57	0.113187	0.0476125	0.0555171	1	1	0.0501253	1	0.0404925	0.0659869	0.94968	0.283448	0.999876	1	1	1	1	1	1
327.15705_31.802_6.44	0.0825395	0.316851	0.334864	0.853822	1	0.196458	0.875475	0.497059	0.232793	0.899616	0.583007	0.999876	1	1	1	1	1	1
283.20576_26.212_5.85	0.312204	0.644902	0.184292	0.999672	0.904275	0.654877	0.926161	0.574516	0.333769	0.94968	0.812561	0.999876	1	1	1	1	1	1
277.11762_16.517_6.07	0.0863221	0.361	0.378917	0.836953	1	0.227025	0.860739	0.57232	0.265644	0.899616	0.61799	0.999876	1	1	1	1	1	1
602.36167_24.387_8.29	0.763609	0.475748	0.0571893	0.705025	0.764237	0.802726	1	0.247691	0.317971	0.96328	0.689909	0.999876	1	1	1	1	1	1
453.69596_30.692_5.55	0.0815256	0.304642	0.322628	0.858789	1	0.188219	0.879801	0.475565	0.223851	0.899616	0.573025	0.999876	1	1	1	1	1	1
589.78175_24.356_8.10	0.716836	0.434617	0.0541668	0.723158	0.779633	0.750717	1	0.221886	0.289593	0.96328	0.658851	0.999876	1	1	1	1	1	1
290.26918_20.910_6.35	0.112958	0.0474778	0.0553678	1	1	0.049938	1	0.0403335	0.0657575	0.94968	0.283448	0.999876	1	1	1	1	1	1
607.32479_31.666_8.97	0.0870004	0.366211	0.384099	0.835577	1	0.231057	0.859534	0.58091	0.269941	0.899616	0.620579	0.999876	1	1	1	1	1	1
333.16743_26.432_5.97	0.592223	0.332275	0.0468772	0.774053	0.822214	0.592326	1	0.161681	0.220922	0.953172	0.595857	0.999876	1	1	1	1	1	1
299.20058_26.935_6.04	0.244913	0.987559	0.325244	0.993845	0.877829	0.805572	0.744268	0.897872	0.429854	0.94968	0.996687	0.999876	1	1	1	1	1	1
638.55830_24.246_8.57	0.336066	0.70389	0.198127	0.999521	0.894841	0.712767	0.921638	0.628541	0.36745	0.94968	0.840922	0.999876	1	1	1	1	1	1
604.79567_24.393_8.26	0.716213	0.433913	0.0539783	0.722865	0.779385	0.749806	1	0.221128	0.288751	0.96328	0.658756	0.999876	1	1	1	1	1	1
293.17513_31.657_5.94	0.0839077	0.333579	0.351589	0.847134	1	0.207832	0.869642	0.526064	0.245076	0.899616	0.596469	0.999876	1	1	1	1	1	1
338.23257_31.658_6.54	0.0839878	0.331572	0.349584	0.848493	1	0.206823	0.870828	0.522613	0.243988	0.899616	0.595835	0.999876	1	1	1	1	1	1
204.96720_9.762_3.90	0.0805246	0.288765	0.30668	0.866135	1	0.178048	0.886188	0.447259	0.212757	0.899616	0.558344	0.999876	1	1	1	1	1	1
458.95734_18.402_6.62	0.536116	0.0295213	0.400686	1	0.726809	0.15603	0.703356	0.134474	0.672294	0.94968	0.257814	0.999876	1	1	1	1	1	1
452.94699_18.400_6.68	0.112516	0.0472179	0.0550796	1	1	0.0495772	1	0.0400271	0.0653151	0.94968	0.283448	0.999876	1	1	1	1	1	1
339.19307_28.923_6.52	0.156866	0.00292063	0.0734353	1	0.710403	0.00941188	0.686022	0.00704741	0.0946365	0.94968	0.10412	0.999876	1	1	0.571121	1	0.664816	1
451.16435_26.528_7.26	0.0424284	0.547415	0.562461	0.565851	1	0.227013	0.61422	0.827814	0.265631	0.847723	0.747332	0.999876	1	1	1	1	1	1
263.99552_5.273_5.49	0.925959	0.664434	0.304569	0.876071	0.966768	0.985833	0.99583	0.720269	0.87144	0.96328	0.823986	0.999876	1	1	1	1	1	1
545.81920_28.869_6.78	0.600829	0.0309613	0.465738	1	0.688255	0.182337	0.6627	0.15872	0.759731	0.953232	0.257814	0.999876	1	1	1	1	1	1
395.10008_31.659_6.74	0.0835849	0.327138	0.345154	0.850159	1	0.203737	0.872282	0.514961	0.240662	0.899616	0.593207	0.999876	1	1	1	1	1	1
265.07080_8.651_5.31	0.903566	0.144413	0.291297	0.874249	0.99205	0.684242	0.753745	0.282207	0.855269	0.96328	0.402773	0.999876	1	1	1	1	1	1
632.71133_24.234_8.59	0.887602	0.192952	0.234771	0.821201	0.999944	0.758425	0.820459	0.293713	0.811744	0.96328	0.443817	0.999876	1	1	1	1	1	1
576.91418_24.327_7.99	0.733148	0.887616	0.107325	0.827229	0.55682	0.992747	0.935444	0.704143	0.449299	0.96328	0.957082	0.999876	1	1	1	1	1	1
289.09765_27.274_5.94	0.0435035	0.654516	0.666677	0.516722	1	0.278965	0.56745	0.919546	0.320418	0.847723	0.818001	0.999876	1	1	1	1	1	1
255.08433_10.497_4.88	0.436267	0.615833	0.247651	0.997337	0.62304	0.992577	0.701307	0.965603	0.507669	0.94968	0.799798	0.999876	1	1	1	1	1	1
191.17979_26.971_4.70	0.0832877	0.32742	0.345435	0.849306	1	0.203457	0.871537	0.515448	0.24036	0.899616	0.593266	0.999876	1	1	1	1	1	1
598.36250_24.383_8.24	0.436814	0.864793	0.224885	0.996519	0.856953	0.864946	0.922456	0.750328	0.469654	0.94968	0.944253	0.999876	1	1	1	1	1	1
583.20417_24.341_8.07	0.343438	0.601753	0.148207	0.995464	0.884043	0.649041	0.947632	0.494699	0.307287	0.94968	0.790511	0.999876	1	1	1	1	1	1
613.87450_24.186_8.28	0.502511	0.722283	0.753391	0.987596	0.999997	0.871644	0.991668	0.961738	0.895444	0.94968	0.854751	0.999876	1	1	1	1	1	1
301.16418_33.892_5.45	0.93791	0.153993	0.247105	0.856858	0.998068	0.677717	0.793032	0.262471	0.80131	0.96418	0.407789	0.999876	1	1	1	1	1	1
231.17445_29.217_5.21	0.335559	0.726408	0.210503	0.999779	0.89724	0.726853	0.915966	0.657458	0.382029	0.94968	0.857154	0.999876	1	1	1	1	1	1
238.01869_29.577_5.35	0.0844038	0.335939	0.353945	0.846908	1	0.2099	0.869444	0.53011	0.247301	0.899616	0.597859	0.999876	1	1	1	1	1	1
167.91752_3.422_4.02	0.555311	0.0297892	0.419656	1	0.714201	0.1631	0.69003	0.140962	0.699275	0.94968	0.257814	0.999876	1	1	1	1	1	1
321.13875_26.801_6.58	0.0822884	0.313337	0.331344	0.855335	1	0.194137	0.876794	0.490898	0.230278	0.899616	0.579907	0.999876	1	1	1	1	1	1
392.22409_9.512_5.83	0.578842	0.0303692	0.443322	1	0.70054	0.17283	0.675625	0.149926	0.731238	0.950159	0.257814	0.999876	1	1	1	1	1	1
596.78532_24.374_8.10	0.45354	0.579393	0.260994	0.997243	0.615636	0.996565	0.695025	0.977268	0.53529	0.94968	0.776949	0.999876	1	1	1	1	1	1
595.35740_24.385_8.28	0.452978	0.551945	0.772676	0.975209	0.99658	0.756145	0.998165	0.916539	0.878667	0.94968	0.751024	0.999876	1	1	1	1	1	1
259.16699_26.109_5.57	0.0821993	0.312135	0.33014	0.855847	1	0.19334	0.877239	0.488786	0.229414	0.899616	0.579423	0.999876	1	1	1	1	1	1
364.58240_30.699_5.89	0.852295	0.166336	0.293652	0.852466	0.995831	0.745656	0.759635	0.310058	0.87692	0.96328	0.41069	0.999876	1	1	1	1	1	1
287.23733_31.941_5.75	0.0428441	0.610856	0.624273	0.534862	1	0.256648	0.584802	0.887108	0.297034	0.847723	0.797328	0.999876	1	1	1	1	1	1
313.14104_30.916_6.34	0.019494	0.0808424	0.0917908	0.81673	1	0.0228618	0.842981	0.0844156	0.0316802	0.808999	0.317142	0.999876	1	1	0.95525	1	1	1
400.12554_1.286_6.12	0.112627	0.0472831	0.0551518	1	1	0.0496676	1	0.0401038	0.0654259	0.94968	0.283448	0.999876	1	1	1	1	1	1
272.19171_27.977_5.46	0.446746	0.619853	0.716078	0.98217	0.999776	0.788592	0.993661	0.923426	0.851496	0.94968	0.80096	0.999876	1	1	1	1	1	1
330.07776_26.855_5.86	0.0452503	0.747886	0.757067	0.482064	1	0.330151	0.534019	0.967744	0.373292	0.847723	0.867078	0.999876	1	1	1	1	1	1
267.20693_4.883_5.38	0.112873	0.0474279	0.0553124	1	1	0.0498686	1	0.0402745	0.0656723	0.94968	0.283448	0.999876	1	1	1	1	1	1
612.16332_37.486_8.07	0.337771	0.689645	0.190096	0.999226	0.892894	0.704774	0.925764	0.609422	0.358706	0.94968	0.838274	0.999876	1	1	1	1	1	1
564.76672_24.287_7.80	0.724123	0.904056	0.0267903	0.283301	0.365507	0.999978	1	0.315589	0.390189	0.96328	0.964597	0.999876	1	1	1	1	1	1
373.16839_8.373_6.22	0.084714	0.345295	0.363278	0.842204	1	0.215646	0.865334	0.546036	0.253472	0.899616	0.606019	0.999876	1	1	1	1	1	1
313.14706_7.415_5.55	0.426925	0.611597	0.256874	0.998336	0.630837	0.992169	0.693868	0.969858	0.512087	0.94968	0.797373	0.999876	1	1	1	1	1	1
635.38227_24.240_8.02	0.238283	0.903416	0.385688	0.985133	0.88379	0.842536	0.704676	0.950271	0.47663	0.94968	0.964275	0.999876	1	1	1	1	1	1
560.62625_24.279_7.80	0.322616	0.14563	0.799132	0.910375	0.816307	0.297017	0.990888	0.585334	0.801818	0.94968	0.402773	0.999876	1	1	1	1	1	1
592.43260_31.377_8.50	0.342442	0.727245	0.20616	0.999585	0.893236	0.732346	0.91861	0.65252	0.381731	0.94968	0.857154	0.999876	1	1	1	1	1	1
636.45881_31.323_8.79	0.0805974	0.290033	0.307955	0.865525	1	0.178847	0.885658	0.449533	0.213631	0.899616	0.55923	0.999876	1	1	1	1	1	1
340.25955_7.409_6.08	0.174344	0.433097	0.769281	0.574566	0.865048	0.441863	0.974366	0.981571	0.886279	0.94968	0.658756	0.999876	1	1	1	1	1	1
577.33494_31.660_8.78	0.0184133	0.0724759	0.0827505	0.823573	1	0.0200423	0.849001	0.0725686	0.0279975	0.808999	0.307824	0.999876	1	1	0.879394	1	1	1
581.64256_24.329_7.91	0.391993	0.66671	0.851713	0.942313	0.99825	0.785748	0.984539	0.968921	0.88354	0.94968	0.825127	0.999876	1	1	1	1	1	1
455.11442_30.682_7.33	0.225054	0.00367603	0.118396	1	0.642758	0.0155861	0.615088	0.0119166	0.173459	0.94968	0.113315	0.999876	1	1	0.753417	1	0.767631	1
592.93492_24.367_8.16	0.814252	0.763648	0.123026	0.809088	0.524139	0.999855	0.928058	0.798607	0.525416	0.96328	0.87571	0.999876	1	1	1	1	1	1
245.07882_31.660_5.38	0.0195726	0.0816123	0.0926201	0.815947	1	0.0231109	0.842291	0.085529	0.0320039	0.808999	0.317542	0.999876	1	1	0.95525	1	1	1
477.01439_30.700_6.99	0.258769	0.00424264	0.142935	1	0.624296	0.019786	0.595881	0.0152865	0.218963	0.94968	0.118648	0.999876	1	1	0.879394	1	0.871943	1
243.08413_5.884_4.76	0.715042	0.914709	0.103176	0.829818	0.561504	0.988743	0.936419	0.680509	0.430819	0.96328	0.969784	0.999876	1	1	1	1	1	1
663.06574_24.319_8.89	0.807376	0.998706	0.559103	0.997028	0.972514	0.996126	0.993693	0.974973	0.925671	0.96328	0.998706	0.999876	1	1	1	1	1	1
570.20050_24.323_8.06	0.152294	0.319453	0.973568	0.635303	0.880157	0.322063	0.983434	0.888145	0.760258	0.94968	0.584323	0.999876	1	1	1	1	1	1
627.38425_24.220_8.43	0.432865	0.651745	0.232472	0.996405	0.62668	0.988404	0.716064	0.950187	0.486649	0.94968	0.815611	0.999876	1	1	1	1	1	1
678.74781_24.349_9.04	0.601139	0.542267	0.205159	0.962892	0.525932	0.999997	0.755479	0.964724	0.556287	0.953232	0.742817	0.999876	1	1	1	1	1	1
261.09468_1.978_4.93	0.34471	0.677579	0.180125	0.998483	0.887972	0.701944	0.931256	0.58845	0.350797	0.94968	0.832955	0.999876	1	1	1	1	1	1
585.35723_24.099_8.00	0.5285	0.607561	0.202304	0.978244	0.562353	0.998209	0.74873	0.946054	0.50866	0.94968	0.795225	0.999876	1	1	1	1	1	1
271.07889_5.487_4.98	0.448093	0.549061	0.284985	0.998715	0.621901	0.99789	0.677234	0.987429	0.55886	0.94968	0.748782	0.999876	1	1	1	1	1	1
576.77377_24.322_7.94	0.469994	0.541968	0.279991	0.99754	0.612201	0.99885	0.687518	0.987387	0.568124	0.94968	0.742817	0.999876	1	1	1	1	1	1
554.34851_4.826_7.27	0.414017	0.592436	0.281226	0.999524	0.645181	0.992913	0.677632	0.980475	0.530472	0.94968	0.785784	0.999876	1	1	1	1	1	1
262.01387_9.053_4.61	0.0441101	0.681242	0.692587	0.507056	1	0.293656	0.558165	0.936175	0.335699	0.847723	0.835298	0.999876	1	1	1	1	1	1
233.18384_4.087_6.18	0.733559	0.407476	0.586755	0.999876	0.997431	0.80541	0.993359	0.752119	0.905965	0.96328	0.638879	0.999876	1	1	1	1	1	1
533.20135_4.109_7.17	0.180186	0.940776	0.435924	0.946909	0.921036	0.766948	0.657667	0.95768	0.451105	0.94968	0.978371	0.999876	1	1	1	1	1	1
575.21040_24.316_7.92	0.542222	0.780827	0.818565	0.986983	0.999992	0.91356	0.99191	0.982596	0.933301	0.94968	0.886865	0.999876	1	1	1	1	1	1
565.84414_24.016_7.80	0.904552	0.962938	0.473241	0.979959	0.958431	0.997952	0.998577	0.946693	0.917564	0.96328	0.984337	0.999876	1	1	1	1	1	1
406.05632_9.532_4.25	0.113903	0.0359267	0.341295	0.890298	0.810315	0.0486004	0.993906	0.132432	0.267335	0.94968	0.257814	0.999876	1	1	1	1	1	1
512.11930_4.827_6.79	0.195712	0.898821	0.443738	0.955072	0.911619	0.806588	0.65857	0.968164	0.476336	0.94968	0.961555	0.999876	1	1	1	1	1	1
159.11703_12.341_4.14	0.0432817	0.625495	0.638502	0.529843	1	0.264767	0.580011	0.89873	0.305566	0.847723	0.803564	0.999876	1	1	1	1	1	1
299.18334_31.794_6.45	0.0182716	0.0715936	0.081794	0.824075	1	0.019732	0.849442	0.0713471	0.02759	0.808999	0.307824	0.999876	1	1	0.879394	1	1	1
313.19977_32.509_6.51	0.019109	0.077818	0.088529	0.819142	1	0.0218331	0.845104	0.0800792	0.0303404	0.808999	0.310836	0.999876	1	1	0.929371	1	1	1
297.09469_11.939_5.17	0.663957	0.898098	0.610238	1	0.965478	0.994214	0.962945	0.993044	0.903224	0.96328	0.961555	0.999876	1	1	1	1	1	1
333.24001_32.607_6.53	0.454106	0.649351	0.818121	0.969245	0.998663	0.814556	0.993571	0.95862	0.899047	0.94968	0.814402	0.999876	1	1	1	1	1	1
421.59445_4.825_4.72	0.180205	0.943352	0.431978	0.948114	0.920098	0.765371	0.658456	0.955952	0.44815	0.94968	0.978371	0.999876	1	1	1	1	1	1
360.98861_1.621_5.37	0.333337	0.660901	0.178587	0.998883	0.892916	0.682252	0.930751	0.57625	0.341182	0.94968	0.820945	0.999876	1	1	1	1	1	1
579.77965_24.329_7.99	0.766682	0.997507	0.524495	0.997275	0.965081	0.99347	0.989915	0.967793	0.898789	0.96328	0.998706	0.999876	1	1	1	1	1	1
255.21389_31.207_5.37	0.656785	0.368256	0.534976	0.99998	0.997626	0.733186	0.995637	0.68982	0.851503	0.96328	0.620601	0.999876	1	1	1	1	1	1
380.08820_30.826_7.08	0.711624	0.386914	0.527975	0.999579	0.998682	0.776132	0.993873	0.700639	0.87031	0.96328	0.627853	0.999876	1	1	1	1	1	1
593.22732_24.368_8.17	0.927094	0.931741	0.455561	0.97229	0.926559	0.99991	0.995382	0.964868	0.917468	0.96328	0.977541	0.999876	1	1	1	1	1	1
299.11073_30.749_4.87	0.873661	0.177436	0.260695	0.837212	0.998997	0.747466	0.790797	0.298143	0.842222	0.96328	0.423471	0.999876	1	1	1	1	1	1
397.08949_30.831_6.41	0.348656	0.660518	0.74596	0.949198	0.999855	0.744196	0.973142	0.944657	0.808871	0.94968	0.820827	0.999876	1	1	1	1	1	1
270.21205_29.132_5.73	0.484478	0.653075	0.758564	0.983935	0.999704	0.830749	0.995055	0.945789	0.888811	0.94968	0.816559	0.999876	1	1	1	1	1	1
640.19443_37.488_8.17	0.694394	0.384624	0.500133	0.999431	0.999302	0.763657	0.995187	0.680686	0.848174	0.96328	0.627853	0.999876	1	1	1	1	1	1
653.04675_4.488_7.60	0.950166	0.741448	0.337974	0.902869	0.962326	0.992087	0.998988	0.790268	0.887468	0.968948	0.864164	0.999876	1	1	1	1	1	1
343.18798_33.219_6.65	0.0103474	0.215312	0.232256	0.485396	1	0.0368461	0.53725	0.313332	0.0495255	0.549935	0.479671	0.999876	1	1	1	1	1	1
349.04360_16.482_5.38	0.428967	0.673104	0.774652	0.970176	0.999742	0.809192	0.987902	0.954903	0.870045	0.94968	0.828525	0.999876	1	1	1	1	1	1
303.10742_5.420_5.48	0.236706	0.933622	0.116995	0.998753	0.602142	0.796741	0.656066	0.699405	0.210069	0.94968	0.977897	0.999876	1	1	1	1	1	1
429.58034_4.828_5.61	0.764646	0.968292	0.558384	0.998492	0.966737	0.995666	0.987343	0.979732	0.91336	0.96328	0.987191	0.999876	1	1	1	1	1	1
315.31600_9.231_5.43	0.430297	0.565429	0.28602	0.999276	0.633338	0.996174	0.674454	0.985505	0.547496	0.94968	0.764268	0.999876	1	1	1	1	1	1
426.19703_13.855_6.67	0.185995	0.831449	0.517982	0.926131	0.921691	0.832047	0.619804	0.989941	0.519929	0.94968	0.920891	0.999876	1	1	1	1	1	1
312.09656_9.233_4.07	0.421447	0.510839	0.339816	0.999981	0.649496	0.99855	0.642755	0.997115	0.596823	0.94968	0.713474	0.999876	1	1	1	1	1	1
345.11628_10.507_5.68	0.410287	0.557809	0.308041	0.999901	0.650355	0.995493	0.658612	0.990258	0.556573	0.94968	0.756838	0.999876	1	1	1	1	1	1
233.10229_8.802_5.51	0.192648	0.841651	0.496604	0.938058	0.916339	0.833293	0.631645	0.986333	0.512709	0.94968	0.929829	0.999876	1	1	1	1	1	1
322.08132_9.541_4.12	0.421972	0.571148	0.288508	0.999514	0.639452	0.995275	0.672176	0.985237	0.544257	0.94968	0.769081	0.999876	1	1	1	1	1	1
459.35113_31.502_7.65	0.695287	0.939004	0.101648	0.837597	0.570624	0.983833	0.936672	0.663909	0.417504	0.96328	0.978371	0.999876	1	1	1	1	1	1
539.16490_4.483_7.11	0.731842	0.950985	0.561148	0.99929	0.964181	0.994833	0.981482	0.982451	0.904388	0.96328	0.980553	0.999876	1	1	1	1	1	1
216.12318_3.713_4.58	0.60176	0.339755	0.0474197	0.770088	0.818929	0.605201	1	0.165923	0.225889	0.953232	0.601104	0.999876	1	1	1	1	1	1
312.59827_9.044_4.05	0.42515	0.508076	0.338523	0.999968	0.646499	0.99875	0.643539	0.997172	0.598264	0.94968	0.711706	0.999876	1	1	1	1	1	1
159.06562_8.498_5.04	0.408449	0.568028	0.301703	0.999869	0.650627	0.994583	0.662358	0.988101	0.54857	0.94968	0.765743	0.999876	1	1	1	1	1	1
637.05194_4.642_7.55	0.768179	0.97449	0.60111	0.999341	0.976334	0.995815	0.989236	0.985093	0.930553	0.96328	0.990607	0.999876	1	1	1	1	1	1
377.07578_9.378_5.77	0.424566	0.557319	0.296587	0.999613	0.638851	0.996374	0.667126	0.988489	0.554857	0.94968	0.756533	0.999876	1	1	1	1	1	1
453.06532_16.498_6.38	0.719861	0.973173	0.591614	0.999805	0.974407	0.992864	0.983445	0.984002	0.912905	0.96328	0.989832	0.999876	1	1	1	1	1	1
315.27050_8.498_5.35	0.423592	0.564212	0.292002	0.99955	0.638625	0.995865	0.669799	0.986829	0.549226	0.94968	0.762984	0.999876	1	1	1	1	1	1
265.02202_9.230_4.56	0.441788	0.748847	0.860937	0.95905	0.99965	0.857141	0.983064	0.983598	0.910987	0.94968	0.867078	0.999876	1	1	1	1	1	1
345.05080_4.326_5.78	0.74389	0.996805	0.56165	0.999112	0.973324	0.992145	0.988587	0.975138	0.907777	0.96328	0.998706	0.999876	1	1	1	1	1	1
387.12622_17.871_5.86	0.653221	0.930793	0.616288	0.999999	0.972405	0.99106	0.966994	0.991043	0.901586	0.96328	0.977541	0.999876	1	1	1	1	1	1
392.04020_15.811_5.64	0.66357	0.919851	0.642464	0.999994	0.975501	0.992995	0.968212	0.993946	0.91558	0.96328	0.972716	0.999876	1	1	1	1	1	1
424.06661_15.803_6.15	0.663457	0.948656	0.623927	1	0.976546	0.990539	0.972316	0.990236	0.907947	0.96328	0.979901	0.999876	1	1	1	1	1	1
534.98431_16.508_6.73	0.642704	0.937598	0.619074	0.999993	0.97401	0.98952	0.966147	0.99073	0.898967	0.96328	0.978371	0.999876	1	1	1	1	1	1
307.03287_9.378_4.95	0.735142	0.956654	0.592348	0.999666	0.971933	0.994934	0.983506	0.985991	0.918098	0.96328	0.982377	0.999876	1	1	1	1	1	1
335.24051_17.408_6.06	0.440544	0.59241	0.259922	0.997867	0.622506	0.994908	0.6932	0.974592	0.525144	0.94968	0.785784	0.999876	1	1	1	1	1	1
484.61002_9.541_5.07	0.7403	0.852735	0.60438	0.999683	0.954872	0.999042	0.969821	0.995472	0.925424	0.96328	0.93749	0.999876	1	1	1	1	1	1
478.06182_16.501_6.51	0.660926	0.977961	0.601511	1	0.982741	0.982106	0.981599	0.979088	0.896717	0.96328	0.993285	0.999876	1	1	1	1	1	1
419.08622_15.809_6.07	0.672319	0.892523	0.625196	1	0.967683	0.995176	0.96434	0.994489	0.912113	0.96328	0.95947	0.999876	1	1	1	1	1	1
480.05638_15.024_6.38	0.658497	0.930657	0.647621	0.999983	0.977948	0.991836	0.96928	0.993601	0.915766	0.96328	0.977541	0.999876	1	1	1	1	1	1
304.02444_15.799_4.94	0.688624	0.957957	0.580058	0.99992	0.969645	0.991475	0.976537	0.984255	0.897985	0.96328	0.982377	0.999876	1	1	1	1	1	1
466.07699_16.494_6.62	0.61458	0.861538	0.668683	0.999623	0.971001	0.993671	0.945459	0.998015	0.910193	0.956949	0.943246	0.999876	1	1	1	1	1	1
638.38563_9.538_7.90	0.476059	0.783672	0.363975	0.999966	0.962181	0.863165	0.967074	0.829597	0.639532	0.94968	0.887622	0.999876	1	1	1	1	1	1
554.34842_4.640_7.30	0.738972	0.954637	0.567613	0.999277	0.96635	0.995084	0.983072	0.98293	0.909373	0.96328	0.982377	0.999876	1	1	1	1	1	1
638.15070_9.539_5.33	0.463536	0.698233	0.324234	0.999817	0.966519	0.813567	0.976783	0.756385	0.59189	0.94968	0.839882	0.999876	1	1	1	1	1	1
554.12940_4.332_7.33	0.731106	0.93903	0.580158	0.999569	0.966327	0.995594	0.980436	0.98641	0.912263	0.96328	0.978371	0.999876	1	1	1	1	1	1
559.74382_23.486_7.66	0.608526	0.344976	0.047693	0.766848	0.816241	0.614112	1	0.168677	0.229103	0.954471	0.605832	0.999876	1	1	1	1	1	1
613.65793_24.414_8.38	0.615829	0.463768	0.248149	0.97446	0.525716	0.999654	0.724199	0.991026	0.622108	0.957657	0.678552	0.999876	1	1	1	1	1	1
602.03636_24.142_8.16	0.683924	0.522118	0.493321	0.999363	0.999949	0.846363	0.999925	0.773987	0.843085	0.96328	0.72342	0.999876	1	1	1	1	1	1
577.68539_24.071_7.94	0.22391	0.935133	0.384562	0.981021	0.894393	0.814761	0.704064	0.941943	0.46044	0.94968	0.977897	0.999876	1	1	1	1	1	1
568.85614_24.030_7.80	0.786397	0.401149	0.515873	0.997295	0.999359	0.821073	0.989616	0.704165	0.89159	0.96328	0.63307	0.999876	1	1	1	1	1	1
673.24118_24.337_8.98	0.771387	0.832534	0.113742	0.817451	0.541849	0.997787	0.933049	0.746432	0.483079	0.96328	0.921735	0.999876	1	1	1	1	1	1
447.27185_18.400_6.72	0.0820961	0.308669	0.326666	0.857681	1	0.191264	0.878837	0.482682	0.22716	0.899616	0.575633	0.999876	1	1	1	1	1	1
552.35894_31.423_8.06	0.0433293	0.634967	0.647702	0.525386	1	0.269291	0.575751	0.905846	0.310308	0.847723	0.80881	0.999876	1	1	1	1	1	1
657.79869_23.962_8.73	0.767607	0.878938	0.099529	0.795242	0.534203	0.995261	0.941112	0.691597	0.448177	0.96328	0.951682	0.999876	1	1	1	1	1	1
580.92666_24.331_7.99	0.167731	0.958226	0.382316	0.953869	0.926795	0.692851	0.683261	0.909497	0.393873	0.94968	0.982377	0.999876	1	1	1	1	1	1
549.68068_23.952_7.60	0.47356	0.441821	0.135634	0.430809	0.933982	0.99726	0.830558	0.375909	0.878092	0.94968	0.662565	0.999876	1	1	1	1	1	1
600.65062_24.383_8.25	0.936941	0.864308	0.490766	0.976833	0.920914	0.999999	0.99243	0.982797	0.935447	0.963928	0.944085	0.999876	1	1	1	1	1	1
546.99767_24.008_7.97	0.737986	0.876618	0.107952	0.825618	0.55245	0.993867	0.934047	0.711354	0.453247	0.96328	0.951543	0.999876	1	1	1	1	1	1
574.35997_24.307_7.85	0.607775	0.598769	0.174816	0.945925	0.518819	0.999779	0.783776	0.930394	0.514369	0.954471	0.789501	0.999876	1	1	1	1	1	1
558.50711_23.990_7.74	0.447115	0.613032	0.828649	0.965202	0.997064	0.791348	0.995487	0.951737	0.899433	0.94968	0.797977	0.999876	1	1	1	1	1	1
696.43390_24.380_9.19	0.851644	0.85692	0.563917	0.99456	0.944462	0.999966	0.985503	0.992264	0.940505	0.96328	0.939861	0.999876	1	1	1	1	1	1
230.14475_12.251_4.88	0.143178	0.299878	0.0548282	0.998849	0.872692	0.230425	0.914208	0.163223	0.081533	0.94968	0.569788	0.999876	1	1	1	1	1	1
551.00121_23.958_7.63	0.766674	0.984518	0.47282	0.994338	0.953721	0.991995	0.989879	0.951747	0.872589	0.96328	0.994984	0.999876	1	1	1	1	1	1
595.69467_24.135_8.16	0.868162	0.982584	0.541831	0.992248	0.971585	0.997772	0.997398	0.968837	0.935209	0.96328	0.994779	0.999876	1	1	1	1	1	1
581.18028_24.092_8.05	0.731684	0.987601	0.571501	0.999492	0.976579	0.990506	0.988417	0.975475	0.907899	0.96328	0.996687	0.999876	1	1	1	1	1	1
676.24245_24.337_8.99	0.816679	0.90602	0.513155	0.99352	0.940668	0.999211	0.985512	0.980916	0.910892	0.96328	0.965609	0.999876	1	1	1	1	1	1
573.01461_24.046_7.90	0.828555	0.94233	0.486248	0.990261	0.940804	0.998617	0.989596	0.970163	0.901846	0.96328	0.978371	0.999876	1	1	1	1	1	1
430.26418_14.399_6.19	0.335305	0.727319	0.210934	0.999788	0.897269	0.727213	0.915599	0.658518	0.382368	0.94968	0.857154	0.999876	1	1	1	1	1	1
406.74983_14.059_6.27	0.0825776	0.31837	0.336384	0.853008	1	0.19736	0.874766	0.499714	0.23377	0.899616	0.584323	0.999876	1	1	1	1	1	1
539.99379_23.975_7.88	0.784325	0.996296	0.500692	0.995073	0.9577	0.994755	0.990484	0.963437	0.893515	0.96328	0.998706	0.999876	1	1	1	1	1	1
567.75920_23.545_7.75	0.730478	0.463082	0.582532	0.999851	0.999396	0.839096	0.997427	0.788329	0.904255	0.96328	0.678552	0.999876	1	1	1	1	1	1
550.17141_23.965_7.67	0.797371	0.896061	0.460505	0.990331	0.918082	0.998898	0.980233	0.972499	0.878909	0.96328	0.9611	0.999876	1	1	1	1	1	1
231.22558_1.428_4.63	0.704963	0.985176	0.0814024	0.793849	0.557337	0.972838	0.952779	0.571541	0.37218	0.96328	0.995296	0.999876	1	1	1	1	1	1
525.17586_4.486_7.21	0.726949	0.945315	0.554218	0.999253	0.96141	0.994822	0.979842	0.982149	0.899813	0.96328	0.978939	0.999876	1	1	1	1	1	1
619.23802_24.435_8.39	0.935922	0.268349	0.122823	0.728894	0.240315	0.915467	0.708544	0.989698	0.599632	0.96328	0.540753	0.999876	1	1	1	1	1	1
608.04385_24.142_8.10	0.247347	0.649143	0.0632654	0.167475	0.681285	0.987362	0.805859	0.345548	0.873184	0.94968	0.814402	0.999876	1	1	1	1	1	1
556.91099_24.263_7.73	0.875361	0.623738	0.0391608	0.403805	0.240243	0.991052	0.946569	0.632689	0.408976	0.96328	0.80264	0.999876	1	1	1	1	1	1
584.49464_24.339_8.02	0.531484	0.751864	0.16417	0.490549	0.590246	0.943784	0.999988	0.861338	0.901048	0.94968	0.867529	0.999876	1	1	1	1	1	1
613.79918_24.419_8.41	0.489268	0.809144	0.131928	0.416986	0.56584	0.948869	0.99944	0.790701	0.878427	0.94968	0.903555	0.999876	1	1	1	1	1	1
585.18986_24.100_8.08	0.863792	0.723286	0.2912	0.826797	0.730188	0.990859	0.99235	0.95815	0.892746	0.96328	0.854885	0.999876	1	1	1	1	1	1
272.29473_28.088_6.50	0.734412	0.137763	0.0396206	0.319548	0.0687164	0.641031	0.668026	0.971896	0.494662	0.96328	0.402773	0.999876	1	1	1	1	1	1
675.90869_24.340_8.99	0.794605	0.522273	0.0418637	0.372042	0.21153	0.962831	0.9392	0.711951	0.462516	0.96328	0.72342	0.999876	1	1	1	1	1	1
673.21822_24.022_8.87	0.803703	0.346195	0.120733	0.799211	0.28563	0.97765	0.707713	0.970565	0.52667	0.96328	0.606397	0.999876	1	1	1	1	1	1
558.47761_24.266_7.69	0.932858	0.383139	0.0739623	0.627193	0.228829	0.970887	0.781026	0.901399	0.468112	0.96328	0.627819	0.999876	1	1	1	1	1	1
678.91583_24.349_9.04	0.903035	0.297431	0.116069	0.736263	0.249622	0.941401	0.716388	0.980809	0.567476	0.96328	0.567028	0.999876	1	1	1	1	1	1
613.22918_24.412_8.37	0.719103	0.376095	0.131835	0.857989	0.319834	0.991848	0.689117	0.969046	0.505608	0.96328	0.624266	0.999876	1	1	1	1	1	1
594.78883_24.368_8.16	0.935636	0.271588	0.12338	0.730175	0.243082	0.917496	0.711797	0.989301	0.600537	0.96328	0.542602	0.999876	1	1	1	1	1	1
615.19993_24.191_8.31	0.832593	0.641476	0.30334	0.81874	0.696351	0.976542	0.987998	0.97808	0.911826	0.96328	0.811187	0.999876	1	1	1	1	1	1
261.09695_2.453_5.08	0.800537	0.372797	0.10681	0.777755	0.280066	0.984475	0.721655	0.951053	0.493456	0.96328	0.624266	0.999876	1	1	1	1	1	1
187.09651_3.259_4.21	0.872646	0.699288	0.331997	0.858193	0.754246	0.988567	0.99078	0.975669	0.916005	0.96328	0.840442	0.999876	1	1	1	1	1	1
582.92138_24.343_8.06	0.697895	0.546926	0.324594	0.760646	0.659071	0.918805	0.99168	0.993422	0.958183	0.96328	0.747046	0.999876	1	1	1	1	1	1
638.72439_24.245_8.46	0.671313	0.364816	0.159086	0.907728	0.350059	0.99345	0.661532	0.984187	0.530199	0.96328	0.619319	0.999876	1	1	1	1	1	1
588.07151_24.353_8.10	0.924931	0.731643	0.342896	0.886916	0.779941	0.994908	0.989428	0.972882	0.906228	0.96328	0.860117	0.999876	1	1	1	1	1	1
558.84150_23.991_7.70	0.613401	0.960886	0.218383	0.619031	0.773374	0.991445	0.998618	0.827526	0.917695	0.955967	0.983297	0.999876	1	1	1	1	1	1
612.51835_24.411_8.32	0.807515	0.323526	0.132333	0.814155	0.287777	0.970164	0.694867	0.982324	0.553147	0.96328	0.589248	0.999876	1	1	1	1	1	1
562.05722_24.290_7.86	0.866657	0.324776	0.111989	0.749819	0.260272	0.961232	0.719825	0.971079	0.539347	0.96328	0.59035	0.999876	1	1	1	1	1	1
579.06783_24.324_7.94	0.756171	0.61725	0.269478	0.749925	0.647919	0.959129	0.991563	0.972882	0.913722	0.96328	0.80096	0.999876	1	1	1	1	1	1
588.68556_24.111_8.13	0.800113	0.694224	0.27716	0.782743	0.700432	0.981121	0.994349	0.959418	0.904054	0.96328	0.838274	0.999876	1	1	1	1	1	1
588.49993_24.353_8.10	0.575334	0.931869	0.222659	0.597534	0.764323	0.984275	0.998129	0.844375	0.933052	0.950159	0.977541	0.999876	1	1	1	1	1	1
664.41353_23.985_8.77	0.784086	0.800968	0.359904	0.837194	0.825756	0.990105	0.999513	0.964531	0.950791	0.96328	0.899001	0.999876	1	1	1	1	1	1
532.32174_24.221_7.74	0.853903	0.555873	0.311504	0.832776	0.652451	0.9622	0.972996	0.990959	0.911727	0.96328	0.755519	0.999876	1	1	1	1	1	1
557.01872_23.980_7.68	0.813962	0.748864	0.239634	0.757584	0.690002	0.990022	0.995867	0.926	0.868877	0.96328	0.867078	0.999876	1	1	1	1	1	1
655.60891_23.952_8.68	0.775484	0.784804	0.355823	0.830096	0.81547	0.987776	0.999403	0.966546	0.951244	0.96328	0.888198	0.999876	1	1	1	1	1	1
465.94971_18.400_6.55	0.998714	0.491263	0.0527827	0.550389	0.737254	0.903742	0.997237	0.243596	0.39925	0.999598	0.698446	0.999876	1	1	1	1	1	1
387.10488_7.136_6.74	0.697469	0.0546869	0.720791	0.927719	0.354096	0.333315	0.634197	0.607015	0.999973	0.96328	0.301006	0.999876	1	1	1	1	1	1
389.25748_6.645_6.27	0.718971	0.0599281	0.662738	0.918369	0.342576	0.362872	0.635051	0.661075	0.999976	0.96328	0.303861	0.999876	1	1	1	1	1	1
219.06505_8.652_4.65	0.508117	0.0560237	0.668153	0.884313	0.682755	0.711984	0.290602	0.313317	0.999959	0.94968	0.301006	0.999876	1	1	1	1	1	1
304.89099_29.092_4.47	0.530435	0.0572587	0.635978	0.883049	0.706626	0.700617	0.307756	0.303031	1	0.94968	0.301006	0.999876	1	1	1	1	1	1
427.30176_34.117_7.44	0.693384	0.0555936	0.713548	0.924345	0.353582	0.334828	0.63935	0.614852	0.99998	0.96328	0.301006	0.999876	1	1	1	1	1	1
227.12575_19.130_4.88	0.500435	0.0688642	0.616651	0.858066	0.756928	0.758713	0.32476	0.3263	1	0.94968	0.307824	0.999876	1	1	1	1	1	1
345.23119_5.463_5.93	0.44246	0.153091	0.449156	0.662465	0.406076	0.424747	0.935823	0.94631	0.999986	0.94968	0.40729	0.999876	1	1	1	1	1	1
225.95706_23.945_5.32	0.127142	0.0170553	0.672209	0.828335	0.176336	0.852561	0.0359521	0.390633	0.577543	0.94968	0.217151	0.999876	1	1	1	0.864096	1	1
396.12991_29.651_6.48	0.0948463	0.0215862	0.583453	0.804609	0.173201	0.9333	0.0322949	0.48458	0.456587	0.93752	0.257814	0.999876	1	1	1	0.81509	1	1
479.18668_2.011_7.03	0.472204	0.0664174	0.647906	0.9975	0.353631	0.809537	0.248787	0.69304	0.864374	0.94968	0.307824	0.999876	1	1	1	1	1	1
244.15468_4.921_5.14	0.409182	0.0111894	0.85525	0.923336	0.280959	0.0713635	0.541111	0.164744	0.863529	0.94968	0.201605	0.999876	1	1	1	1	1	1
264.19599_26.690_5.68	0.133119	0.0159023	0.677386	0.836461	0.17094	0.831793	0.0356878	0.375433	0.591781	0.94968	0.205218	0.999876	1	1	1	0.864096	1	1
155.15458_3.841_4.30	0.23703	0.000585282	0.0304672	0.867778	0.00136929	0.195601	0.00387731	0.478762	0.102677	0.94968	0.0313648	0.999876	1	0.229718	1	0.409558	1	1
370.83565_25.617_5.36	0.689743	0.0133606	0.442502	0.885096	0.532446	0.304836	0.194317	0.0891978	0.974769	0.96328	0.201605	0.999876	1	1	1	1	1	1
287.17250_23.504_6.21	0.27206	0.00328893	0.863074	0.824924	0.143756	0.329065	0.0277834	0.0786999	0.956489	0.94968	0.110353	0.999876	1	1	1	0.761906	1	1
210.14925_15.244_4.75	0.258808	0.0038182	0.872153	0.814907	0.154262	0.36537	0.029134	0.08779	0.948231	0.94968	0.113315	0.999876	1	1	1	0.762295	1	1
225.68361_23.949_5.32	0.0596966	0.000240049	0.660368	0.700334	0.0115117	0.218967	0.00117701	0.0307163	0.4484	0.851273	0.0190172	0.999876	1	0.823003	1	0.18313	1	1
135.01412_18.377_3.36	0.21931	0.00385397	0.981221	0.819195	0.130772	0.410268	0.0243269	0.104922	0.889576	0.94968	0.113315	0.999876	1	1	1	0.738087	1	1
194.13920_18.374_4.08	0.220906	0.00431944	0.956215	0.809623	0.145198	0.428508	0.0265921	0.108284	0.899532	0.94968	0.119392	0.999876	1	1	1	0.761906	1	1
209.20148_12.819_5.24	0.101025	0.00477034	0.142306	0.99679	0.0181309	0.709043	0.00955202	0.57057	0.163989	0.94968	0.126641	0.999876	1	1	1	0.509206	1	1
293.18525_26.419_6.16	0.813548	0.0150676	0.256758	0.903664	0.0636924	0.344087	0.161605	0.659947	0.767447	0.96328	0.201605	0.999876	1	1	1	1	1	1
136.02165_18.375_3.45	0.363963	0.000401971	0.512425	0.75593	0.0761581	0.0713918	0.0104803	0.00974815	0.999986	0.94968	0.0258829	0.999876	1	1	1	0.509206	0.731624	1
420.28026_31.516_7.18	0.891343	0.16775	0.977791	0.999846	0.760115	0.775199	0.69892	0.715572	0.999993	0.96328	0.411602	0.999876	1	1	1	1	1	1
277.13720_13.247_5.47	0.614939	0.00416734	0.847866	0.977293	0.168241	0.195248	0.0751018	0.0892026	0.999754	0.956949	0.118648	0.999876	1	1	1	1	1	1
362.32634_25.319_7.21	0.598587	0.0318148	0.252091	0.969099	0.100639	0.60626	0.174333	0.815314	0.645003	0.953232	0.257814	0.999876	1	1	1	1	1	1
194.00970_15.585_4.10	0.0828886	2.53423e-06	0.730071	0.5248	0.00114848	0.00510443	7.40443e-05	0.000309293	0.88501	0.899616	0.00055597	0.999876	1	0.204716	0.355069	0.163659	0.211952	1
607.38173_35.153_8.86	0.68666	0.0476427	0.709787	0.921105	0.358251	0.338558	0.650749	0.625254	0.999977	0.96328	0.301006	0.999876	1	1	1	1	1	1
215.17571_6.645_5.11	0.408012	6.33232e-05	0.809078	0.990335	0.00594936	0.019758	0.00252706	0.00879804	0.936653	0.94968	0.00828117	0.999876	1	0.565586	0.879394	0.327599	0.697001	1
225.28744_23.941_5.32	0.262722	0.00010154	0.768036	0.955663	0.00774247	0.0425904	0.00225602	0.0134937	0.838801	0.94968	0.00998591	0.999876	1	0.690047	1	0.30639	0.801754	1
439.05538_16.494_6.20	0.953805	0.747216	0.94365	1	0.997979	0.991687	0.998036	0.991466	0.999597	0.970479	0.867078	0.999876	1	1	1	1	1	1
596.98381_16.503_7.12	0.964276	0.690486	0.942254	1	0.995613	0.986976	0.995114	0.985497	0.999653	0.977992	0.838274	0.999876	1	1	1	1	1	1
245.06349_2.564_4.65	0.386582	0.178369	0.469766	0.631826	0.454283	0.421585	0.970492	0.957065	0.999929	0.94968	0.423924	0.999876	1	1	1	1	1	1
337.10496_28.257_6.12	0.838747	0.174421	0.367515	0.890467	0.988308	0.770798	0.751588	0.371519	0.926389	0.96328	0.419222	0.999876	1	1	1	1	1	1
495.63520_18.916_6.84	0.701247	0.0665064	0.654763	0.910004	0.357268	0.375136	0.667233	0.6894	0.999984	0.96328	0.307824	0.999876	1	1	1	1	1	1
510.31055_19.159_6.98	0.695122	0.0687596	0.652897	0.907278	0.362424	0.378878	0.677868	0.698039	0.999988	0.96328	0.307824	0.999876	1	1	1	1	1	1
561.35078_20.053_7.62	0.691805	0.0701791	0.651419	0.905639	0.36545	0.381418	0.684091	0.703517	0.999989	0.96328	0.307824	0.999876	1	1	1	1	1	1
538.82807_16.553_7.38	0.878087	0.194434	0.950413	0.999457	0.806902	0.814164	0.730702	0.739113	0.999999	0.96328	0.446119	0.999876	1	1	1	1	1	1
535.32430_19.843_7.49	0.678978	0.0718209	0.659785	0.903641	0.37399	0.379374	0.697511	0.704001	1	0.96328	0.307824	0.999876	1	1	1	1	1	1
582.35265_17.224_7.67	0.670082	0.0780935	0.64868	0.896765	0.384218	0.392493	0.719545	0.729175	0.999999	0.96328	0.311065	0.999876	1	1	1	1	1	1
628.14575_22.948_8.29	0.589765	0.408246	0.663138	0.903802	0.992841	0.992477	0.796567	0.794085	1	0.950764	0.639372	0.999876	1	1	1	1	1	1
473.29837_18.662_6.77	0.69995	0.0674082	0.653089	0.909047	0.358887	0.377255	0.670745	0.693422	0.999983	0.96328	0.307824	0.999876	1	1	1	1	1	1
435.28197_17.836_6.30	0.427288	0.16556	0.441121	0.645868	0.417949	0.433783	0.949764	0.957424	0.999992	0.94968	0.41069	0.999876	1	1	1	1	1	1
514.30616_15.811_6.94	0.425678	0.181517	0.418671	0.630151	0.423291	0.456717	0.958473	0.971848	0.999924	0.94968	0.42855	0.999876	1	1	1	1	1	1
531.99996_19.622_7.35	0.699991	0.0715878	0.637437	0.904144	0.362067	0.390125	0.682107	0.71599	0.999943	0.96328	0.307824	0.999876	1	1	1	1	1	1
585.35829_22.422_7.85	0.576047	0.409283	0.691206	0.907428	0.990531	0.993885	0.786725	0.808819	0.999978	0.950159	0.639954	0.999876	1	1	1	1	1	1
155.97466_4.644_3.77	0.909421	0.645712	0.864312	0.997656	0.997038	0.992471	0.980423	0.96689	0.999868	0.96328	0.813055	0.999876	1	1	1	1	1	1
574.35192_22.283_7.73	0.928013	0.209284	0.999589	0.999994	0.799874	0.811556	0.768807	0.781582	0.999996	0.96328	0.471469	0.999876	1	1	1	1	1	1
560.33968_16.894_7.50	0.701129	0.0761979	0.6216	0.899434	0.365562	0.404333	0.693309	0.738951	0.999854	0.96328	0.307824	0.999876	1	1	1	1	1	1
643.01829_4.641_7.47	0.932745	0.659818	0.871542	0.998564	0.997343	0.992048	0.985021	0.970991	0.999791	0.96328	0.820672	0.999876	1	1	1	1	1	1
583.86890_22.422_7.84	0.856014	0.619192	0.952517	0.998413	0.989423	0.994546	0.964003	0.976288	0.999922	0.96328	0.80096	0.999876	1	1	1	1	1	1
563.34529_22.139_7.62	0.877218	0.638773	0.960527	0.999068	0.990609	0.994712	0.971523	0.980593	0.999953	0.96328	0.8104	0.999876	1	1	1	1	1	1
528.83630_21.682_7.28	0.76413	0.395445	0.787399	0.970483	0.85132	0.843727	0.973668	0.970538	0.999999	0.96328	0.630766	0.999876	1	1	1	1	1	1
550.84953_21.991_7.50	0.759741	0.385411	0.726342	0.958099	0.816664	0.83838	0.969901	0.978024	0.999971	0.96328	0.627853	0.999876	1	1	1	1	1	1
561.85585_22.138_7.62	0.881359	0.620382	0.966077	0.999251	0.988257	0.993149	0.968552	0.978426	0.99995	0.96328	0.80096	0.999876	1	1	1	1	1	1
572.86231_22.282_7.73	0.893897	0.631029	0.972591	0.999516	0.988757	0.99321	0.972529	0.980974	0.99996	0.96328	0.806314	0.999876	1	1	1	1	1	1
598.02897_20.457_7.87	0.8834	0.640232	0.938932	0.998801	0.992456	0.994308	0.973512	0.977902	0.999995	0.96328	0.811187	0.999876	1	1	1	1	1	1
503.31526_15.810_6.98	0.493971	0.183442	0.896955	0.959234	0.819057	0.461278	0.96998	0.697094	0.931597	0.94968	0.431073	0.999876	1	1	1	1	1	1
609.37356_24.163_8.21	0.428051	0.61173	0.417116	0.669708	0.994809	0.99942	0.843638	0.777743	0.999359	0.94968	0.797373	0.999876	1	1	1	1	1	1
325.13963_6.805_5.88	0.282751	0.105168	0.365989	0.522405	0.951976	0.942246	0.289249	0.273643	0.999985	0.94968	0.369383	0.999876	1	1	1	1	1	1
571.69415_24.037_7.84	0.522291	0.960448	0.579273	0.823032	0.981562	0.982481	0.973753	0.972529	1	0.94968	0.983259	0.999876	1	1	1	1	1	1
585.36943_23.649_7.94	0.605642	0.892142	0.677064	0.906132	0.996558	0.995674	0.975655	0.978511	0.999998	0.953868	0.959423	0.999876	1	1	1	1	1	1
594.87556_22.559_7.96	0.329645	0.670316	0.433759	0.592882	0.992136	0.989119	0.802642	0.819791	0.999989	0.94968	0.827225	0.999876	1	1	1	1	1	1
606.13281_22.692_8.07	0.566234	0.882502	0.648926	0.878571	0.995494	0.993884	0.967295	0.972322	0.999995	0.94968	0.954816	0.999876	1	1	1	1	1	1
630.05670_24.219_8.43	0.0178363	0.980154	0.980903	0.219714	1	0.31063	0.266281	0.999984	0.353247	0.808999	0.99445	0.999876	1	1	1	1	1	1
363.08730_9.051_5.71	0.104641	0.611463	0.670308	0.745891	0.905803	0.833665	0.38384	0.999855	0.497054	0.94968	0.797373	0.999876	1	1	1	1	1	1
597.50269_24.387_8.28	0.242364	0.374843	0.451979	0.979108	0.641687	0.995343	0.406229	0.999293	0.546989	0.94968	0.624266	0.999876	1	1	1	1	1	1
682.75058_24.354_9.06	0.26148	0.34828	0.455948	0.984122	0.622595	0.998494	0.406139	0.998266	0.570192	0.94968	0.607446	0.999876	1	1	1	1	1	1
587.68968_24.100_8.05	0.00460536	0.545103	0.560203	0.0492485	1	0.319311	0.0686757	0.825376	0.362178	0.549935	0.74577	0.999876	1	1	1	1	1	1
585.63703_24.348_8.09	0.202176	0.976216	0.873215	0.684056	0.999018	0.793392	0.801929	0.99972	0.877666	0.94968	0.991866	0.999876	1	1	1	1	1	1
583.06261_24.337_7.99	0.110354	0.572004	0.697987	0.745842	0.900963	0.864258	0.377013	0.99893	0.526265	0.94968	0.76987	0.999876	1	1	1	1	1	1
561.48500_24.278_7.80	0.283245	0.395277	0.382867	0.99553	0.603725	0.997018	0.450961	1	0.529629	0.94968	0.630766	0.999876	1	1	1	1	1	1
590.93300_24.361_8.08	0.291284	0.332902	0.442026	0.991829	0.598869	0.999746	0.41996	0.99806	0.587891	0.94968	0.596005	0.999876	1	1	1	1	1	1
610.53092_24.176_8.26	0.274215	0.903368	0.941538	0.845589	0.999988	0.818726	0.882258	0.99896	0.85438	0.94968	0.964275	0.999876	1	1	1	1	1	1
587.52556_24.100_8.03	0.260273	0.96939	0.934117	0.783625	0.999986	0.868268	0.830849	0.999758	0.897319	0.94968	0.987308	0.999876	1	1	1	1	1	1
597.86390_24.130_8.08	0.286761	0.367988	0.406461	0.994217	0.60107	0.998672	0.437736	0.999831	0.553628	0.94968	0.620601	0.999876	1	1	1	1	1	1
696.26475_24.381_9.19	0.268968	0.350209	0.444021	0.987463	0.615326	0.998718	0.413097	0.998748	0.568044	0.94968	0.608047	0.999876	1	1	1	1	1	1
573.91249_24.313_7.94	0.135119	0.218932	0.597192	0.851807	0.589432	0.997222	0.203297	0.945058	0.518993	0.94968	0.485154	0.999876	1	1	1	1	1	1
671.58020_24.328_8.95	0.264841	0.387895	0.407441	0.990771	0.617887	0.996199	0.431702	0.999953	0.533337	0.94968	0.627853	0.999876	1	1	1	1	1	1
561.92348_24.278_7.71	0.562294	0.711336	0.763535	0.995079	0.961862	0.998551	0.886001	0.999921	0.92836	0.94968	0.846607	0.999876	1	1	1	1	1	1
692.02174_24.075_9.05	0.0427661	0.392777	0.902452	0.42446	0.895503	0.810615	0.168393	0.945764	0.457621	0.847723	0.630389	0.999876	1	1	1	1	1	1
617.70704_24.199_8.22	0.233478	0.41794	0.415554	0.982185	0.647455	0.988818	0.421912	0.999997	0.507721	0.94968	0.645351	0.999876	1	1	1	1	1	1
586.06961_24.347_8.06	0.578302	0.642328	0.734553	0.997446	0.937279	0.99985	0.862865	0.999602	0.924817	0.950159	0.811187	0.999876	1	1	1	1	1	1
553.91066_24.260_7.72	0.54811	0.766374	0.75592	0.994275	0.970936	0.995687	0.899458	1	0.920466	0.94968	0.87571	0.999876	1	1	1	1	1	1
564.01820_24.011_7.71	0.554777	0.762128	0.817406	0.990691	0.980161	0.996609	0.904978	0.999922	0.941771	0.94968	0.875036	0.999876	1	1	1	1	1	1
646.39233_24.272_8.70	0.464597	0.756746	0.841303	0.973098	0.982658	0.990051	0.862461	0.999761	0.919708	0.94968	0.871311	0.999876	1	1	1	1	1	1
643.72433_24.267_8.69	0.52669	0.726241	0.657064	0.997651	0.938401	0.995976	0.866769	0.99993	0.873238	0.94968	0.857154	0.999876	1	1	1	1	1	1
646.06221_24.264_8.67	0.310562	0.462279	0.978857	0.858696	0.956952	0.998162	0.598886	0.941694	0.917574	0.94968	0.678548	0.999876	1	1	1	1	1	1
273.09477_4.334_7.25	0.255382	0.400656	0.402768	0.989474	0.624143	0.994105	0.430755	0.999993	0.519938	0.94968	0.63307	0.999876	1	1	1	1	1	1
566.48986_24.294_7.82	0.569535	0.596195	0.740447	0.996894	0.924555	0.999986	0.837792	0.998582	0.92462	0.949956	0.788659	0.999876	1	1	1	1	1	1
690.75134_24.369_9.13	0.513378	0.613605	0.808643	0.987097	0.949087	0.999568	0.822178	0.99701	0.928223	0.94968	0.797994	0.999876	1	1	1	1	1	1
675.41291_24.335_8.97	0.150955	0.693074	0.683177	0.515218	0.999997	0.890839	0.578823	0.937003	0.911966	0.94968	0.838274	0.999876	1	1	1	1	1	1
642.22882_24.261_8.67	0.108866	0.754939	0.551162	0.36775	0.99613	0.810803	0.548692	0.913265	0.918988	0.94968	0.869583	0.999876	1	1	1	1	1	1
259.11778_10.493_5.09	0.255566	0.368043	0.440597	0.984703	0.627619	0.996997	0.412958	0.999361	0.551664	0.94968	0.620601	0.999876	1	1	1	1	1	1
589.92494_24.359_8.12	0.266277	0.435533	0.98254	0.837382	0.939041	0.996459	0.531814	0.941811	0.877863	0.94968	0.65966	0.999876	1	1	1	1	1	1
307.13908_9.675_5.64	0.0940111	0.656648	0.655011	0.726723	0.916358	0.788095	0.383242	1	0.464596	0.934215	0.81923	0.999876	1	1	1	1	1	1
336.16549_17.192_5.77	0.22828	0.387789	0.46046	0.972395	0.65826	0.992273	0.401872	0.99942	0.538254	0.94968	0.627853	0.999876	1	1	1	1	1	1
600.79299_24.382_8.23	0.0569759	0.443461	0.443441	0.214097	0.999996	0.862626	0.26898	0.687366	0.888025	0.847723	0.664332	0.999876	1	1	1	1	1	1
689.26104_24.363_9.11	0.608138	0.665395	0.785251	0.996956	0.956451	0.999913	0.889599	0.99926	0.948313	0.954471	0.824364	0.999876	1	1	1	1	1	1
575.92054_24.326_8.02	0.621729	0.645034	0.762002	0.99831	0.945604	0.999991	0.88556	0.999271	0.945695	0.960624	0.812561	0.999876	1	1	1	1	1	1
327.10488_10.100_5.50	0.490395	0.677151	0.808497	0.983203	0.964061	0.99719	0.839522	0.999082	0.919297	0.94968	0.832788	0.999876	1	1	1	1	1	1
343.14756_16.478_5.72	0.0825611	0.655145	0.546951	0.299103	0.87099	0.431783	0.792113	0.999636	0.873549	0.899616	0.81807	0.999876	1	1	1	1	1	1
584.78075_24.353_8.15	0.33421	0.384068	0.975165	0.876485	0.930816	0.999988	0.56311	0.90747	0.931071	0.94968	0.627853	0.999876	1	1	1	1	1	1
315.31605_9.376_5.41	0.245173	0.363944	0.457554	0.979138	0.636916	0.996509	0.401986	0.99884	0.554553	0.94968	0.619313	0.999876	1	1	1	1	1	1
339.14164_20.926_5.72	0.222742	0.381602	0.481052	0.965697	0.668214	0.992321	0.394323	0.998777	0.547961	0.94968	0.627278	0.999876	1	1	1	1	1	1
550.33344_24.247_7.65	0.663478	0.694621	0.680536	0.999953	0.936545	0.999959	0.914	1	0.931833	0.96328	0.838274	0.999876	1	1	1	1	1	1
499.26266_3.973_7.36	0.248517	0.416522	0.397065	0.988687	0.631674	0.99141	0.433953	1	0.507994	0.94968	0.645351	0.999876	1	1	1	1	1	1
315.37755_9.376_5.41	0.246202	0.36764	0.45231	0.980307	0.636072	0.9963	0.404987	0.999094	0.551424	0.94968	0.620601	0.999876	1	1	1	1	1	1
660.90349_24.306_8.84	0.329839	0.492962	0.965731	0.890868	0.95328	0.997674	0.632086	0.963213	0.907832	0.94968	0.699467	0.999876	1	1	1	1	1	1
395.04872_9.054_5.81	0.0311883	0.894102	0.321943	0.670332	0.915937	0.307701	0.338222	0.849799	0.135935	0.847723	0.960082	0.999876	1	1	1	1	1	1
651.22724_24.282_8.75	0.326089	0.464873	0.940909	0.897133	0.938234	0.998522	0.606759	0.960551	0.897401	0.94968	0.679211	0.999876	1	1	1	1	1	1
262.09716_4.482_3.80	0.259664	0.373422	0.430129	0.987079	0.624027	0.996909	0.41943	0.999637	0.547205	0.94968	0.624266	0.999876	1	1	1	1	1	1
283.11547_10.151_5.36	0.295911	0.450972	0.972058	0.844831	0.955193	0.99789	0.57749	0.935848	0.912494	0.94968	0.66905	0.999876	1	1	1	1	1	1
450.06764_16.500_6.38	0.612109	0.883333	0.607484	0.999962	0.962022	0.991273	0.946703	0.993845	0.883292	0.955621	0.954991	0.999876	1	1	1	1	1	1
187.04408_15.797_3.29	0.222194	0.375404	0.48157	0.965415	0.66364	0.992937	0.389555	0.998534	0.54795	0.94968	0.624266	0.999876	1	1	1	1	1	1
315.61590_9.230_5.43	0.115842	0.207267	0.657651	0.790853	0.61259	0.995811	0.179967	0.918657	0.524422	0.94968	0.468404	0.999876	1	1	1	1	1	1
233.10223_8.500_4.69	0.47589	0.698781	0.82886	0.977809	0.972031	0.99536	0.842905	0.999145	0.920529	0.94968	0.840187	0.999876	1	1	1	1	1	1
406.05587_15.809_6.02	0.443631	0.687584	0.840516	0.968637	0.972064	0.993691	0.819695	0.998652	0.912221	0.94968	0.838274	0.999876	1	1	1	1	1	1
273.24843_4.331_5.14	0.118684	0.230731	0.606298	0.819707	0.609138	0.992738	0.194188	0.949091	0.496078	0.94968	0.496879	0.999876	1	1	1	1	1	1
315.61588_9.376_5.41	0.117213	0.207539	0.653844	0.795362	0.610616	0.996007	0.181335	0.920129	0.524583	0.94968	0.468489	0.999876	1	1	1	1	1	1
275.11278_15.798_3.50	0.460799	0.736958	0.754472	0.983998	0.965198	0.990588	0.844792	0.999994	0.886071	0.94968	0.863164	0.999876	1	1	1	1	1	1
449.07427_16.500_4.44	0.38577	0.621427	0.900064	0.937278	0.970228	0.993793	0.751274	0.992443	0.909383	0.94968	0.801225	0.999876	1	1	1	1	1	1
315.27050_8.799_5.33	0.490677	0.692536	0.804144	0.983648	0.966315	0.996472	0.846225	0.999423	0.917705	0.94968	0.838274	0.999876	1	1	1	1	1	1
362.09322_16.493_4.32	0.446644	0.698045	0.82105	0.972439	0.970524	0.993029	0.824741	0.999263	0.906353	0.94968	0.839882	0.999876	1	1	1	1	1	1
457.18942_21.072_6.88	0.415449	0.726823	0.876535	0.952834	0.983314	0.98727	0.823459	0.998817	0.912566	0.94968	0.857154	0.999876	1	1	1	1	1	1
275.53234_9.523_5.21	0.124282	0.580863	0.679741	0.762177	0.999745	0.43028	0.839999	0.896043	0.521591	0.94968	0.777757	0.999876	1	1	1	1	1	1
265.02202_9.377_4.55	0.291661	0.897082	0.465164	0.985165	0.968839	0.803022	0.857268	0.92588	0.58671	0.94968	0.961555	0.999876	1	1	1	1	1	1
305.03196_8.497_4.94	0.28005	0.932176	0.48141	0.980065	0.966556	0.811059	0.835535	0.941505	0.589188	0.94968	0.977541	0.999876	1	1	1	1	1	1
390.04509_9.378_5.83	0.291092	0.914445	0.467065	0.98487	0.966202	0.810899	0.850072	0.931673	0.588042	0.94968	0.969784	0.999876	1	1	1	1	1	1
407.06344_9.538_4.23	0.275104	0.433823	0.922575	0.806867	0.96094	0.997631	0.549524	0.914597	0.918248	0.94968	0.658756	0.999876	1	1	1	1	1	1
117.05497_9.235_4.65	0.139403	0.827407	0.664967	0.810362	0.964062	0.782201	0.562031	0.998828	0.551321	0.94968	0.917482	0.999876	1	1	1	1	1	1
320.08273_9.542_5.09	0.155964	0.799079	0.685373	0.826999	0.962948	0.820785	0.577421	0.999628	0.590528	0.94968	0.898649	0.999876	1	1	1	1	1	1
304.10773_9.540_4.13	0.154013	0.773011	0.711002	0.813317	0.963291	0.831863	0.563076	0.999952	0.604197	0.94968	0.880442	0.999876	1	1	1	1	1	1
347.04260_9.049_4.18	0.140392	0.765009	0.700384	0.796956	0.959282	0.816517	0.534507	0.999945	0.576496	0.94968	0.87571	0.999876	1	1	1	1	1	1
391.16011_13.856_6.32	0.13573	0.81038	0.719404	0.778959	0.971828	0.788236	0.552553	0.999823	0.579535	0.94968	0.904369	0.999876	1	1	1	1	1	1
538.75368_24.236_7.73	0.315196	0.334366	0.41512	0.996613	0.579462	0.999932	0.438332	0.999027	0.587084	0.94968	0.597	0.999876	1	1	1	1	1	1
551.33561_23.957_7.62	0.281226	0.402163	0.382058	0.995348	0.608404	0.996414	0.453849	1	0.52688	0.94968	0.633685	0.999876	1	1	1	1	1	1
611.95176_24.413_8.36	0.501586	0.643815	0.846144	0.980906	0.96464	0.998845	0.833524	0.9969	0.935489	0.94968	0.811742	0.999876	1	1	1	1	1	1
591.64629_24.360_8.14	0.316208	0.341114	0.403606	0.997287	0.576214	0.999887	0.442918	0.999466	0.578098	0.94968	0.602762	0.999876	1	1	1	1	1	1
605.66224_24.400_8.29	0.580169	0.599587	0.705374	0.998473	0.914064	0.99999	0.841709	0.999365	0.91586	0.950159	0.789786	0.999876	1	1	1	1	1	1
664.24323_24.313_8.89	0.540942	0.760956	0.729218	0.995244	0.964739	0.995384	0.892525	0.999996	0.90844	0.94968	0.875036	0.999876	1	1	1	1	1	1
594.86313_24.120_8.10	0.152822	0.71103	0.725603	0.540072	1	0.883772	0.587238	0.952959	0.89705	0.94968	0.846607	0.999876	1	1	1	1	1	1
672.40748_24.339_8.97	0.269774	0.401417	0.949809	0.814273	0.944385	0.998629	0.517466	0.907978	0.906488	0.94968	0.63307	0.999876	1	1	1	1	1	1
607.03570_24.166_8.28	0.131976	0.195902	0.645351	0.826398	0.590441	0.998778	0.188044	0.914006	0.545994	0.94968	0.448046	0.999876	1	1	1	1	1	1
591.07049_24.367_8.15	0.532148	0.5837	0.720096	0.995603	0.913403	0.999912	0.809341	0.998731	0.904369	0.94968	0.779725	0.999876	1	1	1	1	1	1
568.07166_24.293_7.79	0.576478	0.752742	0.749568	0.99654	0.967261	0.99766	0.905872	1	0.927768	0.950159	0.868104	0.999876	1	1	1	1	1	1
557.62108_24.293_7.97	0.285673	0.477601	0.988465	0.850767	0.954057	0.995406	0.581773	0.954296	0.891863	0.94968	0.689909	0.999876	1	1	1	1	1	1
555.76870_24.270_7.82	0.338166	0.425436	0.875381	0.841079	0.967989	0.999862	0.608679	0.895099	0.958343	0.94968	0.652335	0.999876	1	1	1	1	1	1
627.21015_24.222_8.52	0.305357	0.441191	0.929278	0.836133	0.961586	0.998821	0.584134	0.919873	0.931125	0.94968	0.662565	0.999876	1	1	1	1	1	1
613.37241_24.411_8.37	0.545829	0.680226	0.748569	0.994783	0.951282	0.99886	0.864686	0.999832	0.918308	0.94968	0.835264	0.999876	1	1	1	1	1	1
674.25260_24.332_8.96	0.557125	0.672327	0.806544	0.992113	0.962645	0.999371	0.871414	0.999018	0.940378	0.94968	0.827926	0.999876	1	1	1	1	1	1
549.91022_24.241_7.63	0.153276	0.249318	0.799807	0.595537	0.915657	0.998937	0.28547	0.727868	0.876795	0.94968	0.518252	0.999876	1	1	1	1	1	1
601.07850_24.383_8.24	0.480418	0.664505	0.848849	0.976256	0.969299	0.997426	0.831516	0.997675	0.929043	0.94968	0.823986	0.999876	1	1	1	1	1	1
604.08189_24.395_8.33	0.488902	0.690673	0.812549	0.982388	0.967569	0.996508	0.845137	0.999269	0.919934	0.94968	0.838274	0.999876	1	1	1	1	1	1
656.90509_24.296_8.82	0.612174	0.739542	0.723549	0.998818	0.959088	0.999014	0.913307	1	0.930381	0.955621	0.863354	0.999876	1	1	1	1	1	1
661.23311_24.305_8.81	0.316785	0.494202	0.978079	0.87789	0.956399	0.996855	0.622185	0.961133	0.905418	0.94968	0.700764	0.999876	1	1	1	1	1	1
589.21089_24.361_8.14	0.142923	0.177663	0.664508	0.836079	0.577115	0.999871	0.186664	0.890615	0.577239	0.94968	0.423658	0.999876	1	1	1	1	1	1
558.67389_23.988_7.74	0.355622	0.539415	0.940041	0.913197	0.959996	0.996854	0.682399	0.977617	0.910704	0.94968	0.740333	0.999876	1	1	1	1	1	1
566.17821_24.019_7.82	0.597861	0.73502	0.737591	0.998004	0.961248	0.998821	0.907363	0.999999	0.930678	0.953232	0.861581	0.999876	1	1	1	1	1	1
553.47820_24.271_7.84	0.513918	0.739257	0.737795	0.992513	0.962176	0.994943	0.87243	1	0.90174	0.94968	0.863354	0.999876	1	1	1	1	1	1
646.55874_24.270_8.70	0.338679	0.456573	0.967022	0.896841	0.942285	0.999237	0.615052	0.952582	0.913292	0.94968	0.673292	0.999876	1	1	1	1	1	1
637.73219_24.242_8.56	0.711444	0.579044	0.806171	0.999575	0.938573	0.999131	0.897997	0.995202	0.974518	0.96328	0.776949	0.999876	1	1	1	1	1	1
603.36080_24.158_8.28	0.293008	0.485955	0.929537	0.877762	0.942304	0.995153	0.588617	0.968131	0.872909	0.94968	0.695057	0.999876	1	1	1	1	1	1
629.04868_24.227_8.46	0.138315	0.212628	0.615302	0.848935	0.593163	0.998153	0.203511	0.935906	0.536296	0.94968	0.475727	0.999876	1	1	1	1	1	1
639.22128_24.251_8.62	0.294175	0.495995	0.952554	0.834511	0.970501	0.995266	0.608939	0.946541	0.91738	0.94968	0.701327	0.999876	1	1	1	1	1	1
668.57206_24.323_8.92	0.307434	0.463566	0.99423	0.866148	0.951236	0.997852	0.593988	0.948624	0.906715	0.94968	0.678552	0.999876	1	1	1	1	1	1
647.79451_23.950_8.66	0.332445	0.565979	0.999259	0.879726	0.976292	0.993501	0.684933	0.973787	0.919302	0.94968	0.764649	0.999876	1	1	1	1	1	1
649.56788_24.279_8.72	0.167715	0.287645	0.732108	0.583171	0.954682	0.998277	0.337378	0.731472	0.915696	0.94968	0.556885	0.999876	1	1	1	1	1	1
652.57211_24.279_8.63	0.305334	0.584913	0.985265	0.854037	0.981544	0.988081	0.673193	0.975004	0.910715	0.94968	0.780249	0.999876	1	1	1	1	1	1
543.00103_23.924_7.54	0.611044	0.806379	0.758695	0.997758	0.977794	0.997033	0.935104	0.999981	0.94011	0.955621	0.902587	0.999876	1	1	1	1	1	1
559.76716_24.292_7.93	0.304041	0.434012	0.912965	0.892441	0.918233	0.998594	0.561189	0.957304	0.874211	0.94968	0.658756	0.999876	1	1	1	1	1	1
286.17091_30.812_6.17	0.279898	0.925615	0.90622	0.788526	0.998686	0.840854	0.889211	0.999999	0.917308	0.94968	0.976278	0.999876	1	1	1	1	1	1
553.76733_24.261_7.75	0.154774	0.271682	0.755772	0.574416	0.941494	0.998025	0.307613	0.728222	0.89561	0.94968	0.542602	0.999876	1	1	1	1	1	1
564.35641_24.010_7.76	0.194543	0.316071	0.74508	0.629949	0.962249	0.998678	0.389953	0.764321	0.930312	0.94968	0.581947	0.999876	1	1	1	1	1	1
569.34634_24.296_7.86	0.0924895	0.337275	0.637775	0.386188	0.985808	0.963559	0.271192	0.725095	0.865068	0.932614	0.599319	0.999876	1	1	1	1	1	1
387.19323_27.375_6.83	0.122682	0.965053	0.568777	0.824652	0.968464	0.674609	0.591114	0.981776	0.459363	0.94968	0.986145	0.999876	1	1	1	1	1	1
620.21878_24.198_8.37	0.334644	0.476237	0.902244	0.913844	0.931517	0.998369	0.61834	0.970564	0.887093	0.94968	0.689909	0.999876	1	1	1	1	1	1
569.63094_24.314_7.97	0.132641	0.226112	0.693229	0.503849	0.934933	0.998912	0.25153	0.642988	0.898968	0.94968	0.495292	0.999876	1	1	1	1	1	1
587.64677_24.351_8.07	0.136613	0.230428	0.703438	0.51647	0.934423	0.998955	0.258776	0.654002	0.899045	0.94968	0.496879	0.999876	1	1	1	1	1	1
602.20163_24.146_8.20	0.161087	0.258496	0.804474	0.61094	0.919822	0.998996	0.301187	0.740002	0.882645	0.94968	0.527725	0.999876	1	1	1	1	1	1
630.39453_24.218_8.45	0.287401	0.562514	0.958737	0.829414	0.981658	0.987947	0.644659	0.96594	0.910571	0.94968	0.761298	0.999876	1	1	1	1	1	1
566.34549_24.299_7.89	0.144063	0.282042	0.708352	0.530196	0.958061	0.996225	0.305788	0.713149	0.903325	0.94968	0.553222	0.999876	1	1	1	1	1	1
389.14200_9.457_6.20	0.253791	0.940422	0.922655	0.769604	0.999289	0.825026	0.862879	0.999999	0.896121	0.94968	0.978371	0.999876	1	1	1	1	1	1
550.47794_24.242_7.65	0.113836	0.295638	0.758097	0.494731	0.951622	0.98591	0.270072	0.752641	0.843607	0.94968	0.564743	0.999876	1	1	1	1	1	1
579.19281_24.083_8.01	0.165952	0.355528	0.800451	0.612553	0.963317	0.991468	0.378655	0.822381	0.886429	0.94968	0.613452	0.999876	1	1	1	1	1	1
630.18276_23.899_8.52	0.299287	0.453589	0.890797	0.814914	0.971875	0.998235	0.591189	0.913474	0.939471	0.94968	0.670973	0.999876	1	1	1	1	1	1
278.57380_4.483_3.81	0.298546	0.483487	0.982575	0.85013	0.961881	0.996308	0.601603	0.949616	0.909705	0.94968	0.694312	0.999876	1	1	1	1	1	1
687.93305_18.399_8.45	0.00421799	0.33108	0.0641738	0.582154	0.878073	0.0275469	0.23731	0.19481	0.00956623	0.549935	0.595835	0.999876	1	1	1	1	1	1
555.13337_4.485_7.24	0.488676	0.742453	0.758276	0.987843	0.967021	0.992908	0.86264	0.999995	0.89949	0.94968	0.864982	0.999876	1	1	1	1	1	1
270.58769_4.483_3.81	0.303526	0.490816	0.986339	0.865376	0.957281	0.996093	0.60816	0.958549	0.901248	0.94968	0.698158	0.999876	1	1	1	1	1	1
554.12956_4.830_4.93	0.302165	0.509133	0.999208	0.85917	0.964592	0.994786	0.620462	0.96089	0.904807	0.94968	0.712137	0.999876	1	1	1	1	1	1
303.10560_5.152_5.34	0.287077	0.487079	0.992026	0.85033	0.9575	0.994872	0.590025	0.956307	0.893884	0.94968	0.69527	0.999876	1	1	1	1	1	1
426.19714_14.073_6.66	0.257043	0.893821	0.559186	0.955398	0.986373	0.777194	0.840355	0.954946	0.622309	0.94968	0.960082	0.999876	1	1	1	1	1	1
554.12955_4.827_5.76	0.311443	0.503967	0.970872	0.876383	0.957464	0.995827	0.622943	0.965019	0.89975	0.94968	0.70798	0.999876	1	1	1	1	1	1
738.07639_9.539_8.22	0.165597	0.857145	0.640128	0.858165	0.96435	0.803027	0.618506	0.997088	0.574379	0.94968	0.939861	0.999876	1	1	1	1	1	1
709.44447_18.663_8.59	0.110827	0.719322	0.193572	0.979429	0.615536	0.749288	0.383783	0.903116	0.190173	0.94968	0.852596	0.999876	1	1	1	1	1	1
384.18653_8.854_6.41	0.271919	0.517743	0.965753	0.819465	0.97279	0.990415	0.599366	0.956013	0.899837	0.94968	0.719242	0.999876	1	1	1	1	1	1
608.04902_4.644_7.10	0.304289	0.495761	0.989837	0.864564	0.95935	0.995859	0.612602	0.959194	0.902849	0.94968	0.701327	0.999876	1	1	1	1	1	1
552.13399_4.484_7.26	0.314588	0.525013	0.982519	0.874069	0.965089	0.994725	0.640977	0.967914	0.905297	0.94968	0.726041	0.999876	1	1	1	1	1	1
464.63285_18.400_6.58	0.121626	0.490647	0.531125	0.828828	0.999992	0.363999	0.866541	0.776921	0.421674	0.94968	0.698158	0.999876	1	1	1	1	1	1
601.78953_24.394_8.30	0.649926	0.157773	0.209886	0.944714	0.240444	0.912273	0.44245	0.998387	0.604967	0.96328	0.407888	0.999876	1	1	1	1	1	1
610.22603_24.414_8.42	0.879613	0.376227	0.516577	0.985164	0.688534	0.95742	0.839584	0.99719	0.937148	0.96328	0.624266	0.999876	1	1	1	1	1	1
606.94054_24.400_8.29	0.860816	0.441796	0.424872	0.973267	0.672197	0.979973	0.860206	1	0.889243	0.96328	0.662565	0.999876	1	1	1	1	1	1
562.77319_24.276_7.77	0.844486	0.451486	0.476734	0.984745	0.716859	0.982771	0.864249	0.99995	0.909861	0.96328	0.66905	0.999876	1	1	1	1	1	1
593.08320_24.367_8.13	0.604413	0.214806	0.173125	0.938617	0.25788	0.96639	0.480146	0.999925	0.522681	0.953625	0.478989	0.999876	1	1	1	1	1	1
585.35759_24.345_8.09	0.867911	0.402932	0.501589	0.984842	0.698985	0.96815	0.849425	0.998913	0.928018	0.96328	0.634546	0.999876	1	1	1	1	1	1
667.08285_24.316_8.87	0.851341	0.131477	0.45034	0.975234	0.37495	0.772079	0.552247	0.92662	0.908228	0.96328	0.402773	0.999876	1	1	1	1	1	1
607.08368_24.398_8.30	0.562681	0.269894	0.685208	0.998948	0.699448	0.978941	0.596059	0.948097	0.908535	0.94968	0.54245	0.999876	1	1	1	1	1	1
616.54491_24.183_8.21	0.247315	0.0965527	0.417117	0.989231	0.298004	0.978717	0.169935	0.895909	0.539073	0.94968	0.357621	0.999876	1	1	1	1	1	1
283.07891_10.225_5.16	0.303189	0.531381	0.401189	0.995795	0.714058	0.986471	0.565065	0.999031	0.558923	0.94968	0.732126	0.999876	1	1	1	1	1	1
681.58998_24.351_9.04	0.321663	0.122922	0.806265	0.942484	0.56895	0.966222	0.273346	0.74904	0.849797	0.94968	0.402114	0.999876	1	1	1	1	1	1
599.65950_24.381_8.19	0.583693	0.172942	0.228685	0.970511	0.270602	0.944513	0.4301	0.998447	0.591432	0.950761	0.416933	0.999876	1	1	1	1	1	1
541.18755_24.223_7.61	0.542994	0.190678	0.22373	0.977542	0.283536	0.965657	0.427557	0.999533	0.56008	0.94968	0.440334	0.999876	1	1	1	1	1	1
596.21511_24.375_8.23	0.789225	0.365087	0.539281	0.995287	0.694731	0.970598	0.792638	0.995084	0.92186	0.96328	0.61941	0.999876	1	1	1	1	1	1
634.54951_24.243_8.59	0.837176	0.4439	0.456994	0.98276	0.697582	0.982717	0.855076	0.999981	0.89824	0.96328	0.664332	0.999876	1	1	1	1	1	1
572.05880_24.312_7.90	0.470057	0.226932	0.234413	0.991459	0.32644	0.989682	0.425346	0.999956	0.526526	0.94968	0.496708	0.999876	1	1	1	1	1	1
690.82952_24.065_9.04	0.498168	0.236597	0.20363	0.98062	0.305751	0.989152	0.446653	0.999986	0.504103	0.94968	0.503157	0.999876	1	1	1	1	1	1
619.09475_24.427_8.45	0.88021	0.401551	0.436967	0.971921	0.651485	0.96736	0.846781	0.99988	0.902713	0.96328	0.63307	0.999876	1	1	1	1	1	1
549.51297_23.952_7.59	0.533985	0.190176	0.228338	0.980502	0.287016	0.967183	0.422568	0.999386	0.560589	0.94968	0.439533	0.999876	1	1	1	1	1	1
679.24179_24.366_9.06	0.528827	0.183503	0.236846	0.983427	0.287741	0.964616	0.41317	0.998731	0.568494	0.94968	0.431073	0.999876	1	1	1	1	1	1
537.04262_24.207_7.55	0.427384	0.226014	0.254671	0.997274	0.343822	0.993519	0.400495	0.999739	0.522442	0.94968	0.495292	0.999876	1	1	1	1	1	1
537.89842_24.205_7.52	0.522691	0.192964	0.232374	0.983481	0.293127	0.970695	0.419962	0.999365	0.55866	0.94968	0.443817	0.999876	1	1	1	1	1	1
689.58774_24.371_9.13	0.533888	0.211652	0.202882	0.972854	0.283809	0.977198	0.441815	0.999998	0.525806	0.94968	0.475301	0.999876	1	1	1	1	1	1
576.63189_24.328_8.02	0.331138	0.0967034	0.329459	0.999963	0.247876	0.9543	0.205804	0.937167	0.53779	0.94968	0.357715	0.999876	1	1	1	1	1	1
532.03505_24.231_7.85	0.541055	0.184337	0.228975	0.979315	0.281961	0.962593	0.41981	0.999118	0.565983	0.94968	0.431989	0.999876	1	1	1	1	1	1
584.92390_24.354_8.12	0.0778725	0.0482902	0.570699	0.759643	0.265868	0.996374	0.0476442	0.66737	0.404127	0.899616	0.284134	0.999876	1	1	1	0.94362	1	1
697.09246_24.383_9.12	0.581794	0.168335	0.231444	0.971758	0.268261	0.941544	0.423521	0.997896	0.59412	0.950159	0.412451	0.999876	1	1	1	1	1	1
583.53069_24.082_7.96	0.839634	0.488147	0.527228	0.991234	0.773947	0.988004	0.885299	0.999904	0.929011	0.96328	0.696098	0.999876	1	1	1	1	1	1
603.93790_24.396_8.32	0.853234	0.407986	0.465139	0.981511	0.677223	0.972839	0.842231	0.999691	0.90796	0.96328	0.639328	0.999876	1	1	1	1	1	1
735.05704_24.184_9.47	0.472369	0.206399	0.243927	0.992455	0.315892	0.984143	0.406701	0.999492	0.54055	0.94968	0.467182	0.999876	1	1	1	1	1	1
578.49142_24.341_8.09	0.268952	0.104373	0.372888	0.996351	0.285318	0.978784	0.186931	0.927688	0.5223	0.94968	0.368862	0.999876	1	1	1	1	1	1
586.79470_24.351_8.07	0.984051	0.386006	0.446381	0.952037	0.64644	0.939461	0.880382	0.999611	0.936243	0.991001	0.627853	0.999876	1	1	1	1	1	1
580.52016_24.075_8.00	0.351163	0.16539	0.880768	0.936223	0.682664	0.979909	0.352726	0.781557	0.896048	0.94968	0.41069	0.999876	1	1	1	1	1	1
588.64102_24.368_8.22	0.804167	0.463947	0.429752	0.983139	0.691511	0.989604	0.848921	0.999996	0.871678	0.96328	0.678552	0.999876	1	1	1	1	1	1
595.50093_24.383_8.27	0.702797	0.241336	0.683756	0.999998	0.668543	0.935431	0.651297	0.933245	0.949771	0.96328	0.508876	0.999876	1	1	1	1	1	1
612.88118_24.178_8.33	0.33363	0.0826501	0.369589	0.999699	0.247468	0.934023	0.191496	0.895995	0.578361	0.94968	0.320705	0.999876	1	1	1	1	1	1
572.20225_24.327_8.05	0.741388	0.512947	0.481424	0.995086	0.760028	0.997158	0.852959	0.999998	0.876425	0.96328	0.715017	0.999876	1	1	1	1	1	1
656.59898_23.986_8.75	0.311395	0.0997943	0.34162	0.999666	0.259726	0.963626	0.200958	0.935648	0.532536	0.94968	0.35988	0.999876	1	1	1	1	1	1
547.47892_24.243_7.71	0.14164	0.0418444	0.465006	0.926169	0.203126	0.960425	0.0650995	0.704502	0.454781	0.94968	0.26818	0.999876	1	1	1	1	1	1
556.76750_24.263_7.72	0.465454	0.233048	0.223753	0.990268	0.321999	0.991558	0.42647	0.999999	0.510066	0.94968	0.498614	0.999876	1	1	1	1	1	1
612.80494_24.410_8.37	0.562322	0.222284	0.706926	0.998562	0.660368	0.961123	0.54641	0.913282	0.917763	0.94968	0.489918	0.999876	1	1	1	1	1	1
550.76236_24.265_7.83	0.393746	0.0483188	0.200663	0.992202	0.108861	0.830812	0.144463	0.923818	0.448268	0.94968	0.284134	0.999876	1	1	1	1	1	1
673.81726_24.026_8.88	0.91104	0.421888	0.50578	0.979807	0.715787	0.96545	0.877778	0.999315	0.940204	0.96328	0.64829	0.999876	1	1	1	1	1	1
682.62060_24.053_8.97	0.854216	0.440705	0.491687	0.985489	0.719637	0.979251	0.864002	0.999793	0.91952	0.96328	0.662565	0.999876	1	1	1	1	1	1
572.63455_24.315_7.98	0.886802	0.471833	0.471909	0.978279	0.727314	0.981152	0.890139	0.999997	0.919741	0.96328	0.686216	0.999876	1	1	1	1	1	1
635.71932_24.246_8.57	0.394835	0.289081	0.744784	0.975646	0.751174	0.998193	0.503189	0.941774	0.858324	0.94968	0.558425	0.999876	1	1	1	1	1	1
679.57610_24.360_9.06	0.3458	0.0994971	0.31488	1	0.243453	0.952556	0.215334	0.946674	0.535123	0.94968	0.35988	0.999876	1	1	1	1	1	1
658.56503_24.304_8.84	0.4906	0.0333024	0.187467	0.970136	0.081095	0.693496	0.14027	0.883166	0.495514	0.94968	0.257814	0.999876	1	1	1	1	1	1
539.82641_23.979_7.90	0.84886	0.498472	0.428272	0.976541	0.713571	0.989805	0.884138	0.999898	0.885938	0.96328	0.704132	0.999876	1	1	1	1	1	1
564.51723_24.034_7.91	0.823329	0.454966	0.499758	0.989879	0.734873	0.985391	0.859742	0.999853	0.913734	0.96328	0.672286	0.999876	1	1	1	1	1	1
735.84721_24.203_9.44	0.861192	0.39594	0.505553	0.986108	0.696389	0.967329	0.842757	0.998565	0.927904	0.96328	0.63085	0.999876	1	1	1	1	1	1
565.91295_24.311_7.98	0.453979	0.221355	0.786333	0.983374	0.704406	0.981272	0.481737	0.884324	0.906092	0.94968	0.488248	0.999876	1	1	1	1	1	1
554.83680_24.018_7.91	0.856256	0.445831	0.59942	0.995174	0.789712	0.977887	0.877481	0.997372	0.956774	0.96328	0.666045	0.999876	1	1	1	1	1	1
606.51623_24.396_8.26	0.578966	0.263741	0.697984	0.999112	0.700644	0.974064	0.601664	0.94167	0.919055	0.950159	0.533468	0.999876	1	1	1	1	1	1
646.22802_24.270_8.69	0.705253	0.271669	0.616801	0.999816	0.660096	0.952598	0.676801	0.964936	0.928819	0.96328	0.542602	0.999876	1	1	1	1	1	1
674.58669_24.333_8.92	0.534272	0.25725	0.626854	0.999359	0.651381	0.980982	0.557612	0.956755	0.87275	0.94968	0.526349	0.999876	1	1	1	1	1	1
585.06887_24.352_8.11	0.634735	0.261015	0.726581	0.999665	0.714168	0.961206	0.636825	0.932141	0.944684	0.96328	0.531097	0.999876	1	1	1	1	1	1
700.62609_24.117_9.13	0.563403	0.219728	0.714786	0.998406	0.661919	0.959449	0.544981	0.908703	0.920976	0.94968	0.486164	0.999876	1	1	1	1	1	1
656.20706_23.968_8.71	0.899242	0.449758	0.535186	0.98574	0.754215	0.973655	0.88997	0.999367	0.94699	0.96328	0.668505	0.999876	1	1	1	1	1	1
700.23208_24.098_9.13	0.952945	0.443641	0.462636	0.964173	0.701451	0.964869	0.89969	0.999967	0.934001	0.96995	0.664332	0.999876	1	1	1	1	1	1
691.61983_24.110_9.05	0.908897	0.419057	0.483422	0.97632	0.698436	0.965679	0.873304	0.99962	0.93136	0.96328	0.646377	0.999876	1	1	1	1	1	1
595.19523_24.126_8.18	0.910571	0.484351	0.461673	0.972549	0.728454	0.980528	0.903147	1	0.921745	0.96328	0.694491	0.999876	1	1	1	1	1	1
544.18851_24.225_7.58	0.604515	0.248018	0.700148	0.999565	0.68545	0.963097	0.601344	0.93237	0.928329	0.953625	0.518129	0.999876	1	1	1	1	1	1
544.47273_24.256_7.86	0.644877	0.254961	0.638907	1	0.656363	0.958589	0.626516	0.952754	0.919158	0.96328	0.524839	0.999876	1	1	1	1	1	1
606.37249_24.396_8.29	0.567496	0.249071	0.660128	0.999489	0.662915	0.972022	0.574446	0.944285	0.900994	0.94968	0.518129	0.999876	1	1	1	1	1	1
612.66128_24.413_8.35	0.577299	0.22546	0.669783	0.999551	0.642086	0.960027	0.55542	0.927526	0.909077	0.950159	0.494624	0.999876	1	1	1	1	1	1
599.86499_24.147_8.22	0.700446	0.237368	0.664448	0.999987	0.652588	0.93439	0.643284	0.936553	0.943755	0.96328	0.503326	0.999876	1	1	1	1	1	1
609.87033_24.171_8.32	0.481322	0.0353216	0.184226	0.971215	0.083059	0.712798	0.142281	0.894875	0.484658	0.94968	0.257814	0.999876	1	1	1	1	1	1
557.76412_24.276_7.77	0.627379	0.236879	0.718694	0.999676	0.683979	0.952103	0.605266	0.919657	0.940983	0.96328	0.503157	0.999876	1	1	1	1	1	1
661.40106_24.303_8.84	0.220328	0.113253	0.412312	0.982794	0.322989	0.992459	0.172122	0.921658	0.505388	0.94968	0.389153	0.999876	1	1	1	1	1	1
682.81604_24.080_8.98	0.29494	0.101068	0.350036	0.999051	0.266646	0.969659	0.194819	0.933547	0.525936	0.94968	0.361114	0.999876	1	1	1	1	1	1
631.55242_24.234_8.53	0.896348	0.463388	0.451105	0.972687	0.706886	0.978762	0.887698	1	0.913283	0.96328	0.678552	0.999876	1	1	1	1	1	1
664.90175_24.332_8.92	0.844138	0.500789	0.451205	0.981346	0.731722	0.990163	0.88571	0.999977	0.896493	0.96328	0.705745	0.999876	1	1	1	1	1	1
540.89882_24.236_7.72	0.542224	0.297022	0.581452	0.999872	0.662661	0.989231	0.596977	0.979441	0.852604	0.94968	0.566627	0.999876	1	1	1	1	1	1
593.64889_24.366_8.15	0.624478	0.284648	0.606413	1	0.666536	0.974343	0.640447	0.971544	0.898544	0.962769	0.556419	0.999876	1	1	1	1	1	1
575.49220_24.320_7.97	0.566917	0.302135	0.719809	0.998172	0.749302	0.9855	0.634211	0.953825	0.921816	0.94968	0.571791	0.999876	1	1	1	1	1	1
664.40363_24.321_8.89	0.123911	0.0378461	0.521773	0.882568	0.213439	0.962314	0.0562392	0.644357	0.466761	0.94968	0.257814	0.999876	1	1	1	1	1	1
671.74202_24.336_8.90	0.596245	0.21844	0.692011	0.999576	0.646994	0.951161	0.561609	0.915457	0.923772	0.953232	0.484441	0.999876	1	1	1	1	1	1
643.05687_24.265_8.63	0.487529	0.314052	0.765874	0.989519	0.783785	0.994761	0.596991	0.947715	0.909526	0.94968	0.580853	0.999876	1	1	1	1	1	1
665.20243_24.037_8.85	0.292111	0.0915897	0.371567	0.998241	0.263824	0.961536	0.183568	0.910314	0.543614	0.94968	0.343702	0.999876	1	1	1	1	1	1
599.03080_24.142_8.17	0.862007	0.436949	0.500326	0.985654	0.722841	0.977223	0.866005	0.999662	0.925335	0.96328	0.660404	0.999876	1	1	1	1	1	1
569.20242_24.303_7.88	0.525382	0.0337656	0.553918	0.999997	0.211933	0.637278	0.180792	0.598354	0.846882	0.94968	0.257814	0.999876	1	1	1	1	1	1
564.67783_24.045_7.96	0.846115	0.421467	0.449461	0.98009	0.675856	0.97736	0.845372	0.99993	0.89778	0.96328	0.647992	0.999876	1	1	1	1	1	1
543.47705_24.223_7.57	0.588248	0.22087	0.629215	0.999935	0.611857	0.95623	0.55223	0.936945	0.896818	0.950764	0.487932	0.999876	1	1	1	1	1	1
673.62223_24.013_8.87	0.525032	0.356066	0.664888	0.998046	0.76343	0.996651	0.647883	0.980643	0.883289	0.94968	0.613452	0.999876	1	1	1	1	1	1
656.39669_24.008_8.77	0.320192	0.10041	0.325479	0.999922	0.251104	0.96186	0.204672	0.943272	0.524651	0.94968	0.360666	0.999876	1	1	1	1	1	1
700.42632_24.131_9.12	0.127833	0.0336178	0.532412	0.884562	0.203461	0.948241	0.0534875	0.611222	0.481552	0.94968	0.257814	0.999876	1	1	1	1	1	1
471.33954_29.548_6.71	0.902612	0.446951	0.485914	0.978027	0.720048	0.973631	0.885416	0.999885	0.930256	0.96328	0.666879	0.999876	1	1	1	1	1	1
560.05704_24.279_7.82	0.320948	0.127049	0.878923	0.923121	0.617292	0.967731	0.283696	0.719904	0.880499	0.94968	0.402114	0.999876	1	1	1	1	1	1
553.33504_24.273_7.84	0.74292	0.27481	0.656107	0.999803	0.687198	0.943565	0.705758	0.957412	0.950677	0.96328	0.544654	0.999876	1	1	1	1	1	1
588.19057_24.097_8.01	0.654181	0.308807	0.68539	0.999972	0.736049	0.974746	0.690292	0.963953	0.936579	0.96328	0.575633	0.999876	1	1	1	1	1	1
671.90465_24.352_8.99	0.603831	0.231677	0.670841	0.999824	0.649951	0.956641	0.579349	0.931198	0.918326	0.953625	0.496879	0.999876	1	1	1	1	1	1
679.40925_24.361_8.99	0.604542	0.238789	0.716848	0.999367	0.68504	0.958627	0.593079	0.921513	0.933983	0.953625	0.505588	0.999876	1	1	1	1	1	1
682.08557_24.354_9.05	0.626049	0.255405	0.708125	0.999736	0.697892	0.961243	0.623525	0.934311	0.937	0.96328	0.525036	0.999876	1	1	1	1	1	1
556.20024_24.259_7.70	0.320932	0.126772	0.91955	0.911488	0.639103	0.966703	0.286336	0.698552	0.896351	0.94968	0.402114	0.999876	1	1	1	1	1	1
588.21472_24.350_8.08	0.359244	0.130314	0.906533	0.934969	0.638599	0.957404	0.314935	0.711927	0.910923	0.94968	0.402773	0.999876	1	1	1	1	1	1
601.20622_24.143_8.18	0.949281	0.434768	0.460725	0.96436	0.693762	0.963176	0.894074	0.999943	0.932452	0.96864	0.658851	0.999876	1	1	1	1	1	1
646.80415_23.922_8.60	0.637902	0.276561	0.69324	0.9999	0.710678	0.96731	0.650836	0.949181	0.935197	0.96328	0.547364	0.999876	1	1	1	1	1	1
543.33264_24.230_7.65	0.585095	0.249045	0.723877	0.998783	0.700198	0.967119	0.592924	0.925861	0.930184	0.950761	0.518129	0.999876	1	1	1	1	1	1
532.17823_24.226_7.79	0.359276	0.114524	0.83518	0.952295	0.568317	0.945452	0.287091	0.71761	0.885045	0.94968	0.392576	0.999876	1	1	1	1	1	1
582.49324_24.361_8.23	0.455946	0.301517	0.778018	0.983737	0.779549	0.995652	0.564215	0.938904	0.901567	0.94968	0.57138	0.999876	1	1	1	1	1	1
661.56732_24.301_8.83	0.319602	0.137894	0.871889	0.923786	0.633217	0.97474	0.296245	0.743039	0.876236	0.94968	0.402773	0.999876	1	1	1	1	1	1
591.35843_24.368_8.20	0.897742	0.141996	0.402376	0.954392	0.359738	0.771423	0.588807	0.953144	0.897718	0.96328	0.402773	0.999876	1	1	1	1	1	1
659.91008_24.298_8.74	0.991574	0.128167	0.369112	0.914219	0.318545	0.703791	0.609526	0.953395	0.909214	0.995707	0.402126	0.999876	1	1	1	1	1	1
593.93692_24.364_8.12	0.357753	0.158657	0.928248	0.9274	0.698067	0.97469	0.353057	0.748696	0.916446	0.94968	0.407888	0.999876	1	1	1	1	1	1
683.01460_24.070_8.98	0.533503	0.0575482	0.653333	0.999425	0.331081	0.742729	0.256117	0.657306	0.894671	0.94968	0.301006	0.999876	1	1	1	1	1	1
547.33141_24.005_7.95	0.874987	0.511573	0.484896	0.982412	0.761474	0.988208	0.904489	0.999999	0.921338	0.96328	0.714148	0.999876	1	1	1	1	1	1
569.01355_24.072_8.04	0.359621	0.13187	0.977664	0.91595	0.68007	0.956749	0.323006	0.678258	0.933833	0.94968	0.402773	0.999876	1	1	1	1	1	1
700.03794_24.091_9.14	0.627858	0.285063	0.682856	0.999889	0.712883	0.972306	0.651915	0.955445	0.928716	0.96328	0.556467	0.999876	1	1	1	1	1	1
634.89406_24.239_8.53	0.600187	0.257269	0.60163	0.999997	0.635624	0.96989	0.596968	0.962621	0.88817	0.953232	0.526349	0.999876	1	1	1	1	1	1
708.64188_24.116_9.22	0.637563	0.281211	0.738941	0.999555	0.740742	0.968013	0.660358	0.939462	0.948438	0.96328	0.553114	0.999876	1	1	1	1	1	1
708.84296_24.116_9.22	0.61992	0.286101	0.704237	0.99968	0.726067	0.973624	0.650499	0.950752	0.933366	0.960354	0.556853	0.999876	1	1	1	1	1	1
717.44635_24.140_9.30	0.486649	0.305836	0.789122	0.987338	0.788792	0.993758	0.59137	0.937993	0.91763	0.94968	0.574115	0.999876	1	1	1	1	1	1
581.06982_24.334_8.00	0.455079	0.283749	0.736986	0.988058	0.742044	0.994106	0.542243	0.941251	0.885321	0.94968	0.555424	0.999876	1	1	1	1	1	1
582.63610_24.358_8.19	0.514856	0.285676	0.676308	0.9974	0.709675	0.989167	0.579075	0.957222	0.88579	0.94968	0.556853	0.999876	1	1	1	1	1	1
605.54375_24.154_8.22	0.498878	0.308423	0.664049	0.996964	0.723497	0.994045	0.588246	0.968113	0.872702	0.94968	0.575633	0.999876	1	1	1	1	1	1
578.63517_24.336_8.03	0.259122	0.200393	0.981213	0.825089	0.799137	0.99822	0.332214	0.761763	0.893617	0.94968	0.456486	0.999876	1	1	1	1	1	1
667.24778_24.316_8.84	0.306173	0.164599	0.936879	0.89486	0.711571	0.98754	0.324167	0.753348	0.892818	0.94968	0.41069	0.999876	1	1	1	1	1	1
541.04389_24.234_7.71	0.713309	0.0559739	0.548323	0.997611	0.277758	0.639402	0.321148	0.714062	0.914184	0.96328	0.301006	0.999876	1	1	1	1	1	1
578.92386_24.330_8.00	0.882029	0.135637	0.48522	0.976766	0.403156	0.761936	0.581222	0.917312	0.931864	0.96328	0.402773	0.999876	1	1	1	1	1	1
587.35930_24.350_8.07	0.813638	0.12444	0.375881	0.96513	0.31751	0.783541	0.50794	0.947816	0.852664	0.96328	0.402114	0.999876	1	1	1	1	1	1
588.92553_24.371_8.23	0.967632	0.144848	0.359364	0.918666	0.334976	0.746216	0.624538	0.968075	0.895468	0.979654	0.402773	0.999876	1	1	1	1	1	1
562.17444_24.041_7.96	0.14982	0.0374549	0.476261	0.930902	0.194801	0.943761	0.06353	0.672593	0.475846	0.94968	0.257814	0.999876	1	1	1	1	1	1
631.88342_24.232_8.55	0.841445	0.140052	0.447695	0.976581	0.38624	0.791292	0.561567	0.935936	0.903471	0.96328	0.402773	0.999876	1	1	1	1	1	1
538.61051_24.235_7.76	0.372362	0.139212	0.844306	0.954347	0.620233	0.96123	0.330485	0.759008	0.894074	0.94968	0.402773	0.999876	1	1	1	1	1	1
544.90001_24.253_7.82	0.351052	0.136731	0.85654	0.943173	0.622656	0.965641	0.314321	0.748702	0.887939	0.94968	0.402773	0.999876	1	1	1	1	1	1
609.53846_24.170_8.26	0.359358	0.0946787	0.860317	0.947776	0.538079	0.920798	0.258883	0.659029	0.896164	0.94968	0.352511	0.999876	1	1	1	1	1	1
657.06553_24.306_8.83	0.371728	0.117611	0.940076	0.93286	0.632414	0.940767	0.30726	0.669595	0.928003	0.94968	0.397425	0.999876	1	1	1	1	1	1
676.07582_24.337_8.99	0.371003	0.12654	0.859529	0.951088	0.605592	0.951583	0.313387	0.728828	0.899804	0.94968	0.402114	0.999876	1	1	1	1	1	1
624.21398_24.214_8.45	0.287609	0.165202	0.971809	0.869544	0.730756	0.990368	0.31384	0.737022	0.895076	0.94968	0.41069	0.999876	1	1	1	1	1	1
637.89668_24.239_8.48	0.29575	0.128977	0.867818	0.911418	0.614779	0.976248	0.268855	0.729163	0.859826	0.94968	0.402773	0.999876	1	1	1	1	1	1
748.54156_29.664_9.69	0.689922	0.260157	0.635748	0.999964	0.65992	0.950387	0.658406	0.95591	0.93131	0.96328	0.529978	0.999876	1	1	1	1	1	1
579.03126_24.064_7.90	0.888072	0.485191	0.473909	0.97855	0.737473	0.983218	0.896815	1	0.920743	0.96328	0.694491	0.999876	1	1	1	1	1	1
599.93919_24.383_8.23	0.871288	0.123459	0.447413	0.970895	0.360602	0.748041	0.547773	0.919041	0.913219	0.96328	0.402114	0.999876	1	1	1	1	1	1
600.08259_24.380_8.21	0.928307	0.116435	0.409311	0.947924	0.326202	0.70883	0.559103	0.926681	0.911981	0.96328	0.39557	0.999876	1	1	1	1	1	1
600.22625_24.381_8.20	0.828846	0.140325	0.413156	0.971717	0.364401	0.80015	0.5501	0.94827	0.880777	0.96328	0.402773	0.999876	1	1	1	1	1	1
575.63572_24.315_7.94	0.543714	0.0621279	0.645373	0.999656	0.340522	0.753663	0.271131	0.67935	0.894896	0.94968	0.306288	0.999876	1	1	1	1	1	1
591.69339_24.121_8.11	0.480238	0.287514	0.690568	0.99443	0.719633	0.992802	0.558598	0.954656	0.876749	0.94968	0.556885	0.999876	1	1	1	1	1	1
563.05697_24.280_7.79	0.312169	0.147241	0.892067	0.913328	0.660298	0.980702	0.304318	0.748622	0.87954	0.94968	0.402773	0.999876	1	1	1	1	1	1
538.32501_24.244_7.82	0.349234	0.12973	0.873016	0.938708	0.619058	0.96099	0.305066	0.727915	0.893739	0.94968	0.402773	0.999876	1	1	1	1	1	1
547.18811_24.253_7.77	0.350633	0.118056	0.893776	0.934754	0.607914	0.950414	0.291308	0.694564	0.902825	0.94968	0.398455	0.999876	1	1	1	1	1	1
547.33291_24.251_7.75	0.29236	0.12752	0.910206	0.896106	0.635399	0.975619	0.2678	0.704786	0.87565	0.94968	0.402114	0.999876	1	1	1	1	1	1
549.62255_24.243_7.66	0.300223	0.153741	0.916591	0.897935	0.684156	0.985379	0.305581	0.746851	0.881833	0.94968	0.407784	0.999876	1	1	1	1	1	1
553.62233_24.266_7.79	0.296134	0.137203	0.910618	0.833719	0.748104	0.976747	0.295714	0.629817	0.939273	0.94968	0.402773	0.999876	1	1	1	1	1	1
562.20198_24.280_7.79	0.300572	0.156792	0.912116	0.899435	0.68653	0.986397	0.309057	0.753778	0.880107	0.94968	0.407888	0.999876	1	1	1	1	1	1
689.75434_24.368_9.13	0.371456	0.127201	0.865872	0.949858	0.610361	0.95182	0.31511	0.726842	0.902338	0.94968	0.402114	0.999876	1	1	1	1	1	1
718.23624_24.156_9.29	0.301881	0.124792	0.918383	0.900069	0.634691	0.971149	0.271198	0.695319	0.88503	0.94968	0.402114	0.999876	1	1	1	1	1	1
563.48285_24.307_8.00	0.310444	0.103268	0.820971	0.934308	0.53638	0.953252	0.240908	0.7005	0.850456	0.94968	0.366775	0.999876	1	1	1	1	1	1
617.54137_24.189_8.36	0.635651	0.280507	0.69937	0.999856	0.718	0.968998	0.654076	0.949451	0.936411	0.96328	0.55211	0.999876	1	1	1	1	1	1
569.51217_24.070_8.05	0.331265	0.140916	0.875181	0.928943	0.640311	0.973265	0.308151	0.746549	0.884225	0.94968	0.402773	0.999876	1	1	1	1	1	1
572.34585_24.324_8.04	0.532585	0.0679319	0.634335	0.999605	0.350963	0.779821	0.278686	0.705964	0.885045	0.94968	0.307824	0.999876	1	1	1	1	1	1
547.16420_24.006_7.96	0.572243	0.358816	0.692779	0.99889	0.780685	0.993731	0.684061	0.97708	0.912702	0.950159	0.616188	0.999876	1	1	1	1	1	1
672.23806_24.345_8.99	0.885524	0.104525	0.414578	0.959292	0.310106	0.704261	0.512312	0.909196	0.902332	0.96328	0.368941	0.999876	1	1	1	1	1	1
656.01215_23.954_8.69	0.680492	0.341741	0.583316	0.999811	0.703732	0.980824	0.72212	0.988337	0.906762	0.96328	0.603202	0.999876	1	1	1	1	1	1
544.61425_24.258_7.86	0.376521	0.126512	0.830335	0.959108	0.589293	0.95043	0.314447	0.743583	0.891379	0.94968	0.402114	0.999876	1	1	1	1	1	1
550.90420_24.273_7.90	0.348958	0.166518	0.817082	0.950207	0.649246	0.981763	0.347062	0.812814	0.86906	0.94968	0.41069	0.999876	1	1	1	1	1	1
555.91123_24.261_7.70	0.305513	0.13316	0.993723	0.872714	0.697683	0.973494	0.290825	0.665837	0.918447	0.94968	0.402773	0.999876	1	1	1	1	1	1
568.49170_24.297_7.86	0.394164	0.143434	0.885544	0.953536	0.650333	0.956517	0.353856	0.745609	0.918701	0.94968	0.402773	0.999876	1	1	1	1	1	1
576.20419_24.344_8.16	0.241998	0.148004	0.977876	0.828	0.70771	0.992977	0.260836	0.706778	0.867411	0.94968	0.402773	0.999876	1	1	1	1	1	1
578.77932_24.334_8.04	0.224638	0.145228	0.990413	0.796506	0.719908	0.994525	0.246803	0.685809	0.867221	0.94968	0.402773	0.999876	1	1	1	1	1	1
627.55586_24.222_8.51	0.373329	0.141347	0.932604	0.934363	0.672426	0.960355	0.341344	0.718438	0.925319	0.94968	0.402773	0.999876	1	1	1	1	1	1
699.83698_24.092_9.13	0.33037	0.121803	0.989739	0.889258	0.678773	0.957897	0.292485	0.641587	0.931778	0.94968	0.402114	0.999876	1	1	1	1	1	1
581.92512_24.334_8.01	0.473714	0.0552076	0.666402	0.99701	0.330149	0.769825	0.225872	0.640256	0.87493	0.94968	0.301006	0.999876	1	1	1	1	1	1
557.19359_24.288_7.92	0.420918	0.115717	0.864413	0.967029	0.586957	0.921284	0.328086	0.704954	0.923805	0.94968	0.394766	0.999876	1	1	1	1	1	1
538.46739_24.240_7.82	0.554322	0.075051	0.53376	0.999997	0.317869	0.794694	0.295683	0.785936	0.843719	0.94968	0.307824	0.999876	1	1	1	1	1	1
551.18860_24.270_7.88	0.900259	0.12252	0.449452	0.965718	0.360355	0.731758	0.561883	0.917106	0.922474	0.96328	0.402114	0.999876	1	1	1	1	1	1
559.91291_24.282_7.83	0.905009	0.160467	0.3604	0.938919	0.355867	0.799526	0.615997	0.975926	0.874286	0.96328	0.407888	0.999876	1	1	1	1	1	1
566.20086_24.302_7.92	0.831329	0.17448	0.35972	0.958111	0.372691	0.849571	0.596457	0.981749	0.845624	0.96328	0.419222	0.999876	1	1	1	1	1	1
574.78090_24.315_7.92	0.794634	0.167845	0.45431	0.984946	0.429875	0.850352	0.580939	0.955025	0.890283	0.96328	0.411602	0.999876	1	1	1	1	1	1
581.35782_24.333_7.98	0.517974	0.0563975	0.618999	0.999608	0.311585	0.749997	0.244038	0.672929	0.872954	0.94968	0.301006	0.999876	1	1	1	1	1	1
657.56397_24.316_8.86	0.874997	0.143363	0.450298	0.97139	0.392793	0.780671	0.585884	0.937958	0.914751	0.96328	0.402773	0.999876	1	1	1	1	1	1
624.54609_24.213_8.47	0.32644	0.143832	0.922912	0.912822	0.671392	0.97519	0.312338	0.727576	0.899751	0.94968	0.402773	0.999876	1	1	1	1	1	1
682.22638_24.040_8.96	0.282469	0.195669	0.847563	0.905861	0.706481	0.996969	0.332478	0.834535	0.837852	0.94968	0.448046	0.999876	1	1	1	1	1	1
578.86316_24.063_7.92	0.359404	0.140438	0.953525	0.922194	0.682155	0.963482	0.332615	0.706221	0.926076	0.94968	0.402773	0.999876	1	1	1	1	1	1
569.91463_24.325_8.08	0.517408	0.0623141	0.569976	0.999932	0.304756	0.774675	0.25388	0.724542	0.847347	0.94968	0.306288	0.999876	1	1	1	1	1	1
674.74739_24.337_8.88	0.521321	0.0374219	0.560936	0.999986	0.227248	0.662138	0.190856	0.616636	0.848014	0.94968	0.257814	0.999876	1	1	1	1	1	1
674.91173_24.337_8.87	0.547402	0.0509211	0.712569	0.99873	0.337803	0.703674	0.249297	0.59544	0.923044	0.94968	0.289297	0.999876	1	1	1	1	1	1
682.24984_24.353_9.05	0.593657	0.0566404	0.619399	0.999999	0.312477	0.705593	0.277146	0.673663	0.903411	0.953232	0.301006	0.999876	1	1	1	1	1	1
562.48928_24.276_7.76	0.51769	0.0560278	0.649055	0.999179	0.324527	0.74683	0.245259	0.653716	0.886532	0.94968	0.301006	0.999876	1	1	1	1	1	1
652.23928_24.279_8.71	0.544105	0.0566672	0.619065	0.999869	0.312399	0.73521	0.255851	0.673968	0.884139	0.94968	0.301006	0.999876	1	1	1	1	1	1
664.81733_23.984_8.78	0.657623	0.331594	0.700518	0.999941	0.763666	0.979788	0.713908	0.968383	0.941701	0.96328	0.595835	0.999876	1	1	1	1	1	1
638.78933_23.938_8.60	0.613229	0.277465	0.713514	0.999503	0.723082	0.971924	0.638925	0.944397	0.934563	0.955967	0.548342	0.999876	1	1	1	1	1	1
622.88918_24.199_8.40	0.110116	0.0343498	0.568681	0.839436	0.219536	0.963298	0.0490688	0.592812	0.473875	0.94968	0.257814	0.999876	1	1	1	0.965133	1	1
554.50183_24.030_8.01	0.589982	0.312523	0.671265	0.999618	0.731273	0.985322	0.652956	0.968029	0.911785	0.950764	0.579423	0.999876	1	1	1	1	1	1
563.34139_24.300_7.94	0.505995	0.0583917	0.637893	0.999088	0.326253	0.763474	0.24509	0.66964	0.876207	0.94968	0.302788	0.999876	1	1	1	1	1	1
568.77884_24.295_7.84	0.482119	0.0574918	0.645559	0.998127	0.327242	0.774334	0.233283	0.661623	0.868972	0.94968	0.301006	0.999876	1	1	1	1	1	1
572.49042_24.317_7.99	0.466928	0.0677492	0.651673	0.997058	0.359103	0.816327	0.249457	0.69538	0.863469	0.94968	0.307824	0.999876	1	1	1	1	1	1
576.06208_24.340_8.12	0.550349	0.0595749	0.574382	0.999997	0.299581	0.745325	0.262129	0.711945	0.86515	0.94968	0.303861	0.999876	1	1	1	1	1	1
593.79291_24.364_8.14	0.524843	0.0618204	0.663511	0.999051	0.348434	0.76265	0.263399	0.66772	0.895031	0.94968	0.306288	0.999876	1	1	1	1	1	1
654.06333_24.285_8.77	0.508642	0.0538707	0.684493	0.99808	0.334418	0.741723	0.238658	0.624231	0.897969	0.94968	0.299958	0.999876	1	1	1	1	1	1
654.22944_24.284_8.76	0.505631	0.0508469	0.572926	0.99987	0.274425	0.738425	0.221908	0.677527	0.844662	0.94968	0.289297	0.999876	1	1	1	1	1	1
660.06998_24.309_8.80	0.578374	0.0712205	0.605374	0.999996	0.344963	0.765607	0.304996	0.733253	0.89029	0.950159	0.307824	0.999876	1	1	1	1	1	1
664.56656_24.334_8.85	0.55751	0.0610785	0.63456	0.999868	0.332349	0.742533	0.273858	0.68179	0.89581	0.94968	0.305607	0.999876	1	1	1	1	1	1
664.73341_24.332_8.88	0.5238	0.0480033	0.670899	0.998977	0.309067	0.708001	0.228809	0.605938	0.899169	0.94968	0.283448	0.999876	1	1	1	1	1	1
667.40879_24.321_8.81	0.479504	0.0541641	0.655846	0.997718	0.322018	0.762849	0.225126	0.642059	0.872928	0.94968	0.299958	0.999876	1	1	1	1	1	1
667.57384_24.323_8.90	0.550105	0.0475725	0.590227	0.999987	0.272161	0.695044	0.23236	0.651974	0.874348	0.94968	0.283448	0.999876	1	1	1	1	1	1
672.07110_24.349_8.99	0.522766	0.0665349	0.632354	0.999483	0.346262	0.781282	0.270873	0.702422	0.88014	0.94968	0.307824	0.999876	1	1	1	1	1	1
682.41646_24.352_9.04	0.549443	0.060063	0.579937	0.999992	0.303517	0.747251	0.263378	0.710412	0.867477	0.94968	0.303861	0.999876	1	1	1	1	1	1
568.63535_24.296_7.84	0.509555	0.0625444	0.619125	0.999448	0.328992	0.776951	0.254844	0.696195	0.868536	0.94968	0.306288	0.999876	1	1	1	1	1	1
621.87754_24.210_8.41	0.393937	0.161527	0.946752	0.939042	0.712237	0.966637	0.383231	0.74392	0.936901	0.94968	0.407897	0.999876	1	1	1	1	1	1
544.75651_24.255_7.85	0.490883	0.0503681	0.589821	0.999567	0.280502	0.744525	0.216035	0.665041	0.846408	0.94968	0.288453	0.999876	1	1	1	1	1	1
549.76676_24.242_7.64	0.565219	0.0464841	0.626851	0.999955	0.284618	0.678083	0.238025	0.624607	0.897142	0.94968	0.283303	0.999876	1	1	1	1	1	1
574.92509_24.315_7.92	0.477957	0.0567038	0.626094	0.998525	0.315789	0.775239	0.22831	0.669947	0.85769	0.94968	0.301006	0.999876	1	1	1	1	1	1
576.34700_24.340_8.11	0.430094	0.0552786	0.648678	0.9948	0.322092	0.798673	0.206519	0.650879	0.844469	0.94968	0.301006	0.999876	1	1	1	1	1	1
581.21413_24.331_7.98	0.433217	0.0551798	0.652535	0.994844	0.323589	0.796104	0.20786	0.648216	0.848107	0.94968	0.301006	0.999876	1	1	1	1	1	1
587.50363_24.350_8.07	0.44702	0.0591572	0.66079	0.995428	0.339382	0.800896	0.222952	0.659252	0.858866	0.94968	0.303861	0.999876	1	1	1	1	1	1
649.72870_24.286_8.71	0.518758	0.0619005	0.615902	0.999633	0.325672	0.76952	0.257181	0.69576	0.871212	0.94968	0.306288	0.999876	1	1	1	1	1	1
649.89224_24.301_8.75	0.50144	0.060418	0.662841	0.998356	0.344055	0.771869	0.249695	0.662873	0.885159	0.94968	0.304177	0.999876	1	1	1	1	1	1
652.73285_24.288_8.61	0.538791	0.0505377	0.545675	1	0.261499	0.718462	0.232359	0.693124	0.845908	0.94968	0.288844	0.999876	1	1	1	1	1	1
657.22945_24.316_8.81	0.529645	0.052806	0.652071	0.999397	0.316066	0.726473	0.242452	0.638502	0.893116	0.94968	0.295299	0.999876	1	1	1	1	1	1
657.39567_24.317_8.78	0.504876	0.051029	0.589691	0.999748	0.282419	0.738532	0.223272	0.668047	0.853101	0.94968	0.289333	0.999876	1	1	1	1	1	1
659.57724_24.297_8.79	0.53513	0.0686829	0.623571	0.999737	0.34758	0.781324	0.280661	0.714652	0.881196	0.94968	0.307824	0.999876	1	1	1	1	1	1
551.04625_24.275_7.91	0.503932	0.0734244	0.597922	0.999585	0.346664	0.814205	0.27423	0.744268	0.854279	0.94968	0.307824	0.999876	1	1	1	1	1	1
557.33580_24.295_7.98	0.52734	0.0494413	0.693315	0.998571	0.323999	0.710828	0.235647	0.599706	0.909164	0.94968	0.285859	0.999876	1	1	1	1	1	1
563.76793_24.304_7.99	0.485476	0.0592354	0.719351	0.99524	0.367803	0.774059	0.244006	0.626099	0.90189	0.94968	0.303861	0.999876	1	1	1	1	1	1
629.21565_24.230_8.56	0.507451	0.0558114	0.680317	0.998135	0.338548	0.750319	0.242634	0.634696	0.89557	0.94968	0.301006	0.999876	1	1	1	1	1	1
576.35148_24.090_8.07	0.381857	0.130543	0.857386	0.95541	0.611906	0.951286	0.325683	0.737317	0.903997	0.94968	0.402773	0.999876	1	1	1	1	1	1
579.35424_24.090_8.06	0.370275	0.190068	0.828185	0.955346	0.688629	0.985493	0.390815	0.836648	0.884445	0.94968	0.439533	0.999876	1	1	1	1	1	1
624.87874_24.210_8.41	0.38048	0.152523	0.827187	0.960199	0.633087	0.967655	0.351956	0.788408	0.890852	0.94968	0.40729	0.999876	1	1	1	1	1	1
602.86581_24.146_8.21	0.548142	0.0740015	0.6152	0.999888	0.356875	0.790034	0.297829	0.736103	0.88233	0.94968	0.307824	0.999876	1	1	1	1	1	1
642.39070_24.269_8.61	0.514172	0.0599425	0.608626	0.999654	0.316782	0.765936	0.250051	0.692831	0.865852	0.94968	0.303861	0.999876	1	1	1	1	1	1
645.39612_24.271_8.60	0.50775	0.0500289	0.603285	0.999659	0.285452	0.73155	0.222895	0.655337	0.861492	0.94968	0.287666	0.999876	1	1	1	1	1	1
556.05609_24.261_7.71	0.481182	0.0609703	0.593796	0.999278	0.31255	0.790224	0.236934	0.705459	0.842227	0.94968	0.305601	0.999876	1	1	1	1	1	1
646.72588_24.267_8.69	0.860389	0.123641	0.43291	0.96976	0.351966	0.754865	0.540161	0.925155	0.902824	0.96328	0.402114	0.999876	1	1	1	1	1	1
650.05823_24.303_8.80	0.507078	0.0499166	0.609682	0.999581	0.287951	0.731059	0.222795	0.650965	0.864354	0.94968	0.2876	0.999876	1	1	1	1	1	1
675.07923_24.335_8.96	0.520842	0.0542652	0.595568	0.999842	0.294582	0.741501	0.23826	0.678288	0.863147	0.94968	0.299958	0.999876	1	1	1	1	1	1
635.05286_24.252_8.58	0.530763	0.0594528	0.615495	0.99978	0.318672	0.753814	0.256639	0.686914	0.876556	0.94968	0.303861	0.999876	1	1	1	1	1	1
569.77278_24.324_8.06	0.538534	0.0477159	0.605669	0.999915	0.279332	0.701809	0.229299	0.643241	0.876725	0.94968	0.283448	0.999876	1	1	1	1	1	1
557.47841_24.288_7.93	0.536634	0.0596932	0.632213	0.999703	0.327299	0.750097	0.261091	0.677969	0.886605	0.94968	0.303861	0.999876	1	1	1	1	1	1
638.98913_23.924_8.58	0.365725	0.122653	0.931148	0.932103	0.637539	0.948118	0.310193	0.684502	0.922435	0.94968	0.402114	0.999876	1	1	1	1	1	1
562.34551_24.278_7.77	0.559252	0.0643482	0.619664	0.999936	0.334159	0.753774	0.281324	0.702278	0.889737	0.94968	0.306403	0.999876	1	1	1	1	1	1
563.62481_24.313_8.06	0.492412	0.061404	0.565582	0.999787	0.300276	0.786741	0.2406	0.72394	0.832579	0.94968	0.306288	0.999876	1	1	1	1	1	1
570.05746_24.325_8.05	0.543568	0.0542701	0.602581	0.99994	0.297804	0.727201	0.248295	0.674079	0.876583	0.94968	0.299958	0.999876	1	1	1	1	1	1
660.23634_24.306_8.83	0.584741	0.0487214	0.580215	0.999998	0.271313	0.679955	0.248622	0.663477	0.883724	0.950761	0.285859	0.999876	1	1	1	1	1	1
569.34438_24.082_8.13	0.311101	0.131649	0.954044	0.894366	0.666932	0.972017	0.288772	0.690041	0.903425	0.94968	0.402773	0.999876	1	1	1	1	1	1
580.68720_24.073_7.99	0.528739	0.0787715	0.624768	0.999623	0.373447	0.812938	0.299497	0.744524	0.878114	0.94968	0.312457	0.999876	1	1	1	1	1	1
586.69147_24.110_8.10	0.713706	0.0750483	0.586374	0.998902	0.344716	0.703797	0.377101	0.755672	0.927511	0.96328	0.307824	0.999876	1	1	1	1	1	1
632.21653_24.230_8.50	0.571091	0.0666228	0.577503	1	0.319503	0.757201	0.288462	0.734786	0.874836	0.949956	0.307824	0.999876	1	1	1	1	1	1
639.55423_24.248_8.62	0.481901	0.0625814	0.658706	0.997635	0.348274	0.791162	0.24564	0.673282	0.874385	0.94968	0.306288	0.999876	1	1	1	1	1	1
650.22581_24.295_8.70	0.567985	0.0565163	0.590059	0.999999	0.29848	0.722286	0.263367	0.690732	0.880624	0.94968	0.301006	0.999876	1	1	1	1	1	1
642.55383_24.280_8.65	0.574981	0.0518559	0.60175	0.999998	0.290291	0.698241	0.254981	0.664338	0.88933	0.950159	0.291696	0.999876	1	1	1	1	1	1
620.37719_24.217_8.42	0.480823	0.0646429	0.670935	0.997099	0.36009	0.797677	0.250594	0.673646	0.879183	0.94968	0.30705	0.999876	1	1	1	1	1	1
667.74146_24.319_8.89	0.504492	0.0596633	0.594373	0.999674	0.309256	0.771682	0.244113	0.700271	0.854221	0.94968	0.303861	0.999876	1	1	1	1	1	1
635.21654_24.265_8.61	0.509574	0.0574233	0.575606	0.99987	0.294299	0.76178	0.239623	0.703029	0.847147	0.94968	0.301006	0.999876	1	1	1	1	1	1
642.72075_24.284_8.73	0.527335	0.0469585	0.613607	0.999795	0.280389	0.704737	0.223406	0.634842	0.875728	0.94968	0.283448	0.999876	1	1	1	1	1	1
639.38824_24.250_8.58	0.519487	0.0637067	0.623383	0.999553	0.33423	0.774667	0.262254	0.697848	0.87487	0.94968	0.306288	0.999876	1	1	1	1	1	1
628.21314_24.241_8.50	0.599476	0.0595885	0.596969	0.999999	0.310277	0.715012	0.285515	0.69844	0.895726	0.953232	0.303861	0.999876	1	1	1	1	1	1
602.69992_24.146_8.21	0.524836	0.060077	0.661871	0.999092	0.342595	0.756655	0.259127	0.662142	0.894519	0.94968	0.303861	0.999876	1	1	1	1	1	1
393.04321_9.539_5.81	0.0934056	0.104148	0.597784	0.325223	0.41422	0.112383	1	0.818676	0.850947	0.932614	0.368523	0.999876	1	1	1	1	1	1
446.44467_30.688_5.37	0.797295	0.783538	0.827439	0.98442	0.984222	0.982887	0.999981	0.999959	1	0.96328	0.887622	0.999876	1	1	1	1	1	1
307.03296_4.826_5.02	0.345574	0.306584	0.901493	0.826493	0.841967	0.504782	0.999944	0.904769	0.940033	0.94968	0.574779	0.999876	1	1	1	1	1	1
306.24296_21.072_6.36	0.730616	0.271091	0.277013	0.956262	0.405228	0.958543	0.640341	0.999974	0.722888	0.96328	0.542602	0.999876	1	1	1	1	1	1
327.10505_13.237_5.51	0.145614	0.885949	0.6966	0.507769	0.997641	0.797877	0.672786	0.980502	0.898854	0.94968	0.956369	0.999876	1	1	1	1	1	1
357.34013_15.805_5.75	0.275158	0.561879	0.442004	0.545729	0.998538	0.991765	0.69194	0.765416	0.999372	0.94968	0.761298	0.999876	1	1	1	1	1	1
357.40565_15.804_5.75	0.2723	0.566645	0.443661	0.543566	0.998455	0.990853	0.691708	0.769365	0.999255	0.94968	0.765144	0.999876	1	1	1	1	1	1
293.12365_8.802_5.50	0.293322	0.536048	0.409204	0.543292	0.998086	0.996112	0.698675	0.726461	0.999967	0.94968	0.736775	0.999876	1	1	1	1	1	1
338.18100_8.801_5.83	0.139734	0.93453	0.721999	0.508926	0.996891	0.763463	0.684874	0.989086	0.881302	0.94968	0.977897	0.999876	1	1	1	1	1	1
357.59376_16.494_5.77	0.0463353	0.623638	0.44328	0.184521	0.996072	0.71709	0.319567	0.80141	0.85411	0.847723	0.80264	0.999876	1	1	1	1	1	1
275.30950_16.489_5.21	0.0415517	0.618935	0.473382	0.18176	0.997911	0.695022	0.296484	0.817144	0.817765	0.847723	0.80096	0.999876	1	1	1	1	1	1
577.01805_24.078_8.02	0.709784	0.850105	0.879747	0.978418	0.994657	0.979611	0.999412	0.999988	0.999077	0.96328	0.935378	0.999876	1	1	1	1	1	1
600.87564_24.134_8.15	0.277716	0.547659	0.350723	0.483942	0.993015	0.994352	0.699708	0.688453	0.999998	0.94968	0.747332	0.999876	1	1	1	1	1	1
608.54402_24.162_8.19	0.858135	0.958266	0.902963	0.99605	0.999247	0.99866	0.999838	0.999959	0.999994	0.96328	0.982377	0.999876	1	1	1	1	1	1
617.20793_24.193_8.40	0.50547	0.766171	0.66755	0.856814	0.999557	0.996436	0.919621	0.95247	0.999605	0.94968	0.87571	0.999876	1	1	1	1	1	1
564.18815_24.010_7.76	0.629351	0.980538	0.646789	0.904128	0.988232	0.991839	0.989945	0.985682	0.999983	0.96328	0.994486	0.999876	1	1	1	1	1	1
586.36850_24.088_8.00	0.643495	0.81666	0.750165	0.941977	0.99987	0.99924	0.967879	0.978349	0.999942	0.96328	0.9091	0.999876	1	1	1	1	1	1
593.86868_24.126_8.12	0.329511	0.54598	0.421511	0.587953	0.998262	0.997949	0.736012	0.741602	1	0.94968	0.746112	0.999876	1	1	1	1	1	1
573.11338_22.282_7.73	0.827742	0.87891	0.812856	0.987097	0.991923	0.994631	0.999998	0.999936	0.999984	0.96328	0.951682	0.999876	1	1	1	1	1	1
638.15057_9.235_7.98	0.297719	0.926795	0.973187	0.832771	0.999732	0.851598	0.895937	0.999969	0.903906	0.94968	0.976799	0.999876	1	1	1	1	1	1
117.05502_9.381_4.65	0.137193	0.919345	0.719443	0.503283	0.997362	0.767228	0.6728	0.987326	0.879719	0.94968	0.972716	0.999876	1	1	1	1	1	1
492.59659_9.541_5.06	0.140865	0.912244	0.787936	0.545059	0.999359	0.772589	0.668145	0.992771	0.853831	0.94968	0.96976	0.999876	1	1	1	1	1	1
258.13390_8.082_4.96	0.511234	0.86725	0.562457	0.810048	0.989356	0.991119	0.954476	0.949593	0.999998	0.94968	0.945849	0.999876	1	1	1	1	1	1
275.11282_9.541_4.14	0.0517059	0.647311	0.45975	0.203644	0.995911	0.724298	0.347686	0.823777	0.86077	0.847723	0.813632	0.999876	1	1	1	1	1	1
215.09157_5.372_4.49	0.250505	0.155904	0.398137	0.505783	0.976034	0.986774	0.329831	0.367567	0.999857	0.94968	0.407888	0.999876	1	1	1	1	1	1
311.11036_14.661_5.33	0.445684	0.338021	0.638651	0.818967	0.98583	0.996145	0.652423	0.726236	0.999416	0.94968	0.599897	0.999876	1	1	1	1	1	1
316.32120_28.009_6.97	0.337957	0.135916	0.930138	0.87657	0.735878	0.299828	0.982305	0.637727	0.872303	0.94968	0.402773	0.999876	1	1	1	1	1	1
566.01155_24.017_7.81	0.965556	0.556397	0.981122	1	0.971574	0.976941	0.968836	0.974734	0.999991	0.978943	0.75564	0.999876	1	1	1	1	1	1
584.35594_24.098_8.06	0.532552	0.251976	0.732644	0.906594	0.937935	0.967986	0.620197	0.694998	0.999417	0.94968	0.52151	0.999876	1	1	1	1	1	1
611.78542_23.781_8.22	0.807805	0.805482	0.763214	0.978179	0.978355	0.98749	0.999978	0.999988	0.999898	0.96328	0.901938	0.999876	1	1	1	1	1	1
568.75025_23.546_7.75	0.869103	0.842897	0.804481	0.990418	0.988056	0.994881	0.999939	0.99999	0.999831	0.96328	0.930208	0.999876	1	1	1	1	1	1
598.20613_24.129_8.13	0.869519	0.607031	0.990991	0.999609	0.981688	0.9932	0.961867	0.981961	0.999603	0.96328	0.795225	0.999876	1	1	1	1	1	1
630.55880_24.221_8.41	0.863604	0.255592	0.749857	0.979991	0.721617	0.77904	0.8817	0.92191	0.999641	0.96328	0.525036	0.999876	1	1	1	1	1	1
682.42716_24.040_8.96	0.523696	0.31144	0.728051	0.899275	0.964301	0.985961	0.673392	0.751448	0.999278	0.94968	0.578836	0.999876	1	1	1	1	1	1
691.03127_24.067_9.04	0.981015	0.485131	0.917845	0.999994	0.974063	0.946925	0.966385	0.934015	0.999411	0.988292	0.694491	0.999876	1	1	1	1	1	1
610.20348_24.168_8.26	0.636002	0.352651	0.825345	0.962389	0.957045	0.980353	0.766399	0.83137	0.999426	0.96328	0.610662	0.999876	1	1	1	1	1	1
673.42099_24.014_8.87	0.884965	0.515021	0.973112	0.999889	0.960799	0.980705	0.939886	0.967269	0.9996	0.96328	0.716943	0.999876	1	1	1	1	1	1
576.85007_24.094_8.11	0.64426	0.368618	0.736173	0.94534	0.978272	0.981188	0.791524	0.801956	0.999998	0.96328	0.620601	0.999876	1	1	1	1	1	1
594.17478_23.696_8.03	0.892045	0.745222	0.828737	0.993631	0.979397	0.988563	0.998469	0.999762	0.999883	0.96328	0.867078	0.999876	1	1	1	1	1	1
606.36885_24.166_8.26	0.7752	0.57482	0.986275	0.99747	0.975859	0.996345	0.929135	0.977363	0.997633	0.96328	0.772567	0.999876	1	1	1	1	1	1
593.53852_24.112_8.08	0.843477	0.545723	0.881026	0.995502	0.988319	0.987959	0.945785	0.944838	1	0.96328	0.746112	0.999876	1	1	1	1	1	1
595.52807_24.124_8.11	0.589118	0.282028	0.701783	0.91922	0.959567	0.966332	0.690806	0.709528	0.99999	0.950764	0.553222	0.999876	1	1	1	1	1	1
571.52595_24.037_7.84	0.974441	0.592466	0.978232	0.999995	0.983507	0.981193	0.978187	0.975334	0.999998	0.983754	0.785784	0.999876	1	1	1	1	1	1
587.85764_24.103_8.09	0.588703	0.319303	0.671494	0.908411	0.977131	0.977197	0.727872	0.728112	1	0.950764	0.584323	0.999876	1	1	1	1	1	1
550.33881_23.954_7.59	0.639605	0.33672	0.717109	0.939804	0.973822	0.97402	0.766879	0.767512	1	0.96328	0.598706	0.999876	1	1	1	1	1	1
557.50831_24.000_7.79	0.600055	0.290981	0.691897	0.920139	0.964986	0.966986	0.707127	0.712905	1	0.953232	0.559971	0.999876	1	1	1	1	1	1
620.59013_23.821_8.32	0.851778	0.528691	0.983471	0.999061	0.972031	0.986107	0.937601	0.962506	0.999738	0.96328	0.728771	0.999876	1	1	1	1	1	1
554.66922_24.031_8.02	0.661649	0.315463	0.73431	0.950889	0.96432	0.963666	0.760005	0.758263	1	0.96328	0.581947	0.999876	1	1	1	1	1	1
629.39554_23.856_8.41	0.509535	0.251999	0.791317	0.914885	0.920095	0.973906	0.598185	0.726344	0.997056	0.94968	0.52151	0.999876	1	1	1	1	1	1
562.00653_24.046_7.97	0.594053	0.378652	0.682603	0.912698	0.987264	0.988485	0.776514	0.782713	1	0.953232	0.625724	0.999876	1	1	1	1	1	1
613.03948_24.198_8.39	0.871842	0.152146	0.952827	0.999985	0.701039	0.765218	0.657456	0.72626	0.999525	0.96328	0.40729	0.999876	1	1	1	1	1	1
664.61603_23.984_8.78	0.933707	0.580079	0.959585	0.999819	0.984065	0.983968	0.970075	0.969926	1	0.96328	0.777437	0.999876	1	1	1	1	1	1
630.22699_24.220_8.48	0.804478	0.291427	0.671798	0.955531	0.712482	0.789532	0.919592	0.960511	0.99913	0.96328	0.560074	0.999876	1	1	1	1	1	1
573.34916_24.045_7.89	0.612747	0.334504	0.720777	0.931997	0.972591	0.977982	0.749484	0.76756	0.99999	0.955967	0.597	0.999876	1	1	1	1	1	1
602.97988_23.739_8.12	0.88404	0.614791	0.854334	0.996255	0.995981	0.991543	0.971748	0.95786	0.999917	0.96328	0.799173	0.999876	1	1	1	1	1	1
627.71499_24.233_8.49	0.918762	0.130017	0.956279	0.999999	0.665157	0.703843	0.645282	0.685816	0.999906	0.96328	0.402773	0.999876	1	1	1	1	1	1
642.88843_24.279_8.71	0.817462	0.156188	0.94287	0.999809	0.702066	0.79758	0.633017	0.737651	0.998348	0.96328	0.407888	0.999876	1	1	1	1	1	1
647.20667_23.922_8.60	0.63795	0.363012	0.680503	0.928735	0.984963	0.980008	0.789669	0.76966	0.999985	0.96328	0.618707	0.999876	1	1	1	1	1	1
660.40347_24.302_8.81	0.825005	0.125256	0.990372	0.999537	0.67468	0.740148	0.588727	0.658906	0.999527	0.96328	0.402114	0.999876	1	1	1	1	1	1
601.36743_24.155_8.23	0.637806	0.321137	0.751568	0.947998	0.962565	0.970589	0.749622	0.771968	0.99998	0.96328	0.585977	0.999876	1	1	1	1	1	1
655.81123_23.953_8.69	0.627072	0.427412	0.666191	0.919172	0.994373	0.991481	0.82807	0.808611	0.999983	0.96328	0.654661	0.999876	1	1	1	1	1	1
602.53289_24.150_8.25	0.838327	0.161654	0.999581	0.999542	0.739959	0.792683	0.65892	0.717728	0.999705	0.96328	0.407897	0.999876	1	1	1	1	1	1
632.05004_24.230_8.54	0.785283	0.126788	0.983704	0.998936	0.673972	0.763184	0.568874	0.665388	0.998772	0.96328	0.402114	0.999876	1	1	1	1	1	1
583.68930_24.115_8.10	0.559382	0.281435	0.774516	0.929027	0.94106	0.973557	0.663418	0.747634	0.999106	0.94968	0.553173	0.999876	1	1	1	1	1	1
591.02532_24.137_8.19	0.559009	0.330999	0.791758	0.932336	0.957132	0.985965	0.70657	0.799724	0.998617	0.94968	0.595835	0.999876	1	1	1	1	1	1
652.89837_24.289_8.75	0.86749	0.131033	0.917765	1	0.646073	0.733776	0.615225	0.70752	0.9989	0.96328	0.402773	0.999876	1	1	1	1	1	1
638.05677_24.254_8.53	0.971886	0.140757	0.958968	0.999919	0.685623	0.696387	0.692864	0.704002	0.999998	0.982567	0.402773	0.999876	1	1	1	1	1	1
638.40132_23.891_8.50	0.674222	0.378533	0.752059	0.956964	0.977969	0.979224	0.812431	0.81662	1	0.96328	0.625724	0.999876	1	1	1	1	1	1
605.70193_24.176_8.31	0.83708	0.17315	0.973537	0.999143	0.769555	0.807473	0.677992	0.7214	0.999879	0.96328	0.417071	0.999876	1	1	1	1	1	1
616.04309_24.198_8.38	0.811965	0.184837	0.93569	0.997471	0.802645	0.831181	0.684452	0.718859	0.99994	0.96328	0.432804	0.999876	1	1	1	1	1	1
623.38121_24.217_8.42	0.864486	0.152997	0.957055	0.999966	0.704627	0.769834	0.65526	0.725506	0.999496	0.96328	0.40729	0.999876	1	1	1	1	1	1
627.87875_24.246_8.58	0.758819	0.117444	0.978971	0.998384	0.653258	0.759071	0.535665	0.64895	0.998009	0.96328	0.397425	0.999876	1	1	1	1	1	1
630.71943_24.235_8.50	0.918468	0.158108	0.89642	0.999927	0.680088	0.755067	0.685997	0.763438	0.999273	0.96328	0.407888	0.999876	1	1	1	1	1	1
630.88537_24.231_8.46	0.817299	0.143778	0.966852	0.998659	0.729847	0.773844	0.622138	0.671097	0.999838	0.96328	0.402773	0.999876	1	1	1	1	1	1
638.22300_24.249_8.51	0.892553	0.127559	0.950642	1	0.657537	0.712786	0.625926	0.684031	0.999727	0.96328	0.402114	0.999876	1	1	1	1	1	1
645.56114_24.268_8.58	0.904338	0.123932	0.983528	0.999995	0.668468	0.697839	0.628904	0.659841	0.999959	0.96328	0.402114	0.999876	1	1	1	1	1	1
645.72846_24.265_8.65	0.852928	0.141828	0.983912	0.999584	0.717739	0.754247	0.636674	0.676514	0.999912	0.96328	0.402773	0.999876	1	1	1	1	1	1
653.06591_24.283_8.73	0.819844	0.132025	0.962755	0.999721	0.672322	0.756657	0.595551	0.686253	0.998973	0.96328	0.402773	0.999876	1	1	1	1	1	1
638.20063_23.891_8.50	0.686808	0.387323	0.622741	0.927868	0.993903	0.976984	0.836579	0.757297	0.998966	0.96328	0.627853	0.999876	1	1	1	1	1	1
572.18380_24.055_7.93	0.871415	0.159351	0.975357	0.999941	0.724006	0.775088	0.670875	0.726352	0.999748	0.96328	0.407888	0.999876	1	1	1	1	1	1
647.00606_23.922_8.60	0.618771	0.34273	0.673604	0.920259	0.982069	0.978188	0.764483	0.749571	0.999994	0.959394	0.604034	0.999876	1	1	1	1	1	1
561.83924_24.056_8.07	0.826941	0.181784	0.978603	0.999587	0.756927	0.825265	0.679607	0.757186	0.999281	0.96328	0.428823	0.999876	1	1	1	1	1	1
588.02508_24.099_8.07	0.795052	0.148766	0.976546	0.999193	0.708232	0.795301	0.612128	0.708729	0.998741	0.96328	0.404268	0.999876	1	1	1	1	1	1
595.36204_24.120_8.13	0.849413	0.15979	0.97595	0.999415	0.749765	0.783495	0.664672	0.702394	0.999923	0.96328	0.407888	0.999876	1	1	1	1	1	1
564.84636_24.027_7.86	0.640265	0.318958	0.722907	0.941855	0.967737	0.968855	0.752173	0.755407	1	0.96328	0.584323	0.999876	1	1	1	1	1	1
635.38316_24.268_8.67	0.815345	0.135571	0.986393	0.999427	0.691337	0.763734	0.601913	0.680613	0.999329	0.96328	0.402773	0.999876	1	1	1	1	1	1
576.68222_24.107_8.20	0.561476	0.307924	0.712229	0.910704	0.966413	0.97946	0.6965	0.739921	0.999874	0.94968	0.57557	0.999876	1	1	1	1	1	1
594.02952_24.133_8.18	0.745463	0.169966	0.98796	0.996497	0.758043	0.844727	0.620794	0.723994	0.998444	0.96328	0.414428	0.999876	1	1	1	1	1	1
565.01387_24.013_7.77	0.634975	0.356413	0.715551	0.937519	0.978776	0.97958	0.779634	0.782531	1	0.96328	0.613452	0.999876	1	1	1	1	1	1
620.87582_24.227_8.53	0.840225	0.164956	0.937685	0.998543	0.77625	0.793096	0.671465	0.690823	0.99999	0.96328	0.41069	0.999876	1	1	1	1	1	1
704.51525_29.694_9.37	0.989675	0.134313	0.865474	0.99797	0.623279	0.670695	0.692376	0.740001	0.999835	0.99568	0.402773	0.999876	1	1	1	1	1	1
606.20038_24.178_8.29	0.77661	0.128828	0.991373	0.998125	0.691124	0.769762	0.570421	0.656372	0.999133	0.96328	0.402773	0.999876	1	1	1	1	1	1
620.54106_24.230_8.55	0.783301	0.132307	0.996901	0.998455	0.694472	0.772882	0.57995	0.665887	0.999132	0.96328	0.402773	0.999876	1	1	1	1	1	1
569.17728_24.079_8.12	0.822418	0.150975	0.951954	0.999794	0.698715	0.787051	0.628377	0.724802	0.998723	0.96328	0.40729	0.999876	1	1	1	1	1	1
598.86290_24.160_8.25	0.839163	0.168501	0.925088	0.998189	0.787194	0.797793	0.677433	0.689755	0.999997	0.96328	0.412502	0.999876	1	1	1	1	1	1
605.86567_24.187_8.37	0.854246	0.161698	0.973446	0.999451	0.753793	0.78384	0.670471	0.704107	0.999945	0.96328	0.407897	0.999876	1	1	1	1	1	1
613.36993_24.207_8.41	0.871342	0.182246	0.992678	0.999783	0.771877	0.804589	0.70705	0.743763	0.999922	0.96328	0.429204	0.999876	1	1	1	1	1	1
586.85898_24.105_8.05	0.920015	0.130697	0.909055	0.999945	0.640688	0.707275	0.642244	0.711349	0.99953	0.96328	0.402773	0.999876	1	1	1	1	1	1
660.48906_29.724_9.02	0.664229	0.04905	0.879519	0.982982	0.533467	0.600538	0.325512	0.382256	0.999528	0.96328	0.285859	0.999876	1	1	1	1	1	1
293.17509_16.804_5.61	0.10882	0.1656	0.150644	0.135449	0.19707	0.19707	1	1	1	0.94968	0.41069	0.999876	1	1	1	1	1	1
277.21632_26.164_5.86	0.165306	0.231569	0.24883	0.292025	1	1	0.343144	0.343144	1	0.94968	0.496879	0.999876	1	1	1	1	1	1
419.02003_27.274_6.58	0.355843	0.723295	0.416121	0.589156	0.828539	0.831397	0.988863	0.988217	1	0.94968	0.854885	0.999876	1	1	1	1	1	1
530.31692_15.213_7.47	0.100617	0.773006	0.781331	0.460934	1	0.771914	0.513451	0.9763	0.79802	0.94968	0.880442	0.999876	1	1	1	1	1	1
275.25820_32.389_6.25	0.356552	0.703262	0.430801	0.599526	0.828599	0.821118	0.990466	0.991879	0.999999	0.94968	0.840922	0.999876	1	1	1	1	1	1
618.36993_16.554_8.18	0.100649	0.815677	0.822505	0.479638	1	0.74721	0.531665	0.987187	0.77547	0.94968	0.908715	0.999876	1	1	1	1	1	1
574.34326_15.915_7.81	0.307865	0.791054	0.434569	0.557704	0.86861	0.827914	0.967754	0.983091	0.999778	0.94968	0.892792	0.999876	1	1	1	1	1	1
201.07396_36.133_4.20	0.562786	0.900315	0.531459	0.82005	0.945136	0.969328	0.994625	0.984403	0.999644	0.94968	0.962766	0.999876	1	1	1	1	1	1
254.94948_6.632_4.48	0.355429	0.694839	0.439049	0.603937	0.829819	0.81556	0.990868	0.993354	0.999992	0.94968	0.838274	0.999876	1	1	1	1	1	1
394.30892_25.217_6.93	0.934936	0.0760819	0.88714	0.995971	0.503823	0.503823	0.592883	0.592883	1	0.96328	0.307824	0.999876	1	1	1	1	1	1
307.22488_32.744_6.37	0.728705	0.932298	0.768579	0.966585	0.998585	0.998598	0.992861	0.992822	1	0.96328	0.977541	0.999876	1	1	1	1	1	1
469.33840_7.468_7.41	0.862272	0.474996	0.395016	0.975792	0.999305	0.886936	0.993756	0.674395	0.85279	0.96328	0.68941	0.999876	1	1	1	1	1	1
404.28287_23.634_7.16	0.867054	0.287815	0.397388	0.96344	0.522989	0.926773	0.751255	0.997455	0.879381	0.96328	0.556885	0.999876	1	1	1	1	1	1
228.17882_2.828_4.85	0.164949	0.231169	0.248423	0.291322	1	1	0.34241	0.34241	1	0.94968	0.496879	0.999876	1	1	1	1	1	1
481.35039_35.380_7.94	0.0537403	0.38719	0.369322	0.775769	0.586004	0.823633	0.159524	1	0.218389	0.847723	0.627853	0.999876	1	1	1	1	1	1
321.89458_10.238_4.74	0.465212	0.36477	0.0590147	0.856847	0.191363	1	0.483853	0.878111	0.227268	0.94968	0.619319	0.999876	1	1	1	1	1	1
395.24052_29.115_6.89	0.916248	0.160034	0.307024	0.911392	0.31712	0.798528	0.612034	0.986879	0.83968	0.96328	0.407888	0.999876	1	1	1	1	1	1
171.13985_33.885_4.36	0.230813	0.163968	0.861794	0.861176	0.670171	0.997449	0.260789	0.788546	0.803313	0.94968	0.41069	0.999876	1	1	1	1	1	1
234.94578_1.520_4.49	0.246643	0.175996	0.923542	0.852056	0.720779	0.997256	0.289906	0.775843	0.845997	0.94968	0.421455	0.999876	1	1	1	1	1	1
213.16733_27.743_4.74	0.584465	0.395805	0.675592	0.999406	0.797982	0.996278	0.718572	0.986645	0.909733	0.950761	0.63085	0.999876	1	1	1	1	1	1
527.98434_30.810_7.39	0.52129	0.390826	0.569942	0.999723	0.73426	0.998895	0.661878	0.995291	0.833669	0.94968	0.629384	0.999876	1	1	1	1	1	1
606.34868_26.867_8.20	0.233607	0.16618	0.873984	0.859129	0.680149	0.99742	0.266051	0.78588	0.811858	0.94968	0.41069	0.999876	1	1	1	1	1	1
252.21706_34.776_5.28	0.266823	0.145309	0.296855	0.999358	0.292277	0.995168	0.221314	0.98373	0.447704	0.94968	0.402773	0.999876	1	1	1	1	1	1
419.27745_31.348_7.22	0.527182	0.427873	0.620406	0.999092	0.789764	0.99955	0.699544	0.995136	0.861888	0.94968	0.654673	0.999876	1	1	1	1	1	1
575.41286_32.902_8.47	0.90292	0.165346	0.28954	0.906831	0.310268	0.813458	0.609576	0.991184	0.819136	0.96328	0.41069	0.999876	1	1	1	1	1	1
314.23844_29.158_6.14	0.517432	0.393631	0.612007	0.999058	0.761469	0.998964	0.66659	0.992528	0.854005	0.94968	0.630553	0.999876	1	1	1	1	1	1
318.27917_25.418_6.72	0.370152	0.362474	0.171901	0.993267	0.364908	0.999884	0.459837	0.988423	0.375993	0.94968	0.618707	0.999876	1	1	1	1	1	1
200.20117_28.184_5.27	0.11183	0.410406	0.71	0.461991	0.988831	0.954587	0.341907	0.818609	0.860057	0.94968	0.640305	0.999876	1	1	1	1	1	1
275.88925_4.007_4.24	0.312022	0.169436	0.287152	0.999993	0.313037	0.994898	0.272544	0.992429	0.475109	0.94968	0.414081	0.999876	1	1	1	1	1	1
397.32877_36.235_7.47	0.555978	0.411959	0.612259	0.999712	0.77452	0.998552	0.705575	0.994328	0.871065	0.94968	0.641042	0.999876	1	1	1	1	1	1
524.36031_30.956_7.11	0.483376	0.380226	0.0605314	0.850773	0.201097	1	0.509337	0.872817	0.237811	0.94968	0.626824	0.999876	1	1	1	1	1	1
433.02511_27.182_6.46	0.516139	0.430723	0.659644	0.997661	0.812486	0.999678	0.698844	0.992666	0.875382	0.94968	0.656779	0.999876	1	1	1	1	1	1
259.89119_23.865_4.34	0.581302	0.991422	0.665359	0.998951	0.989212	0.972524	0.967639	0.988858	0.89482	0.950159	0.998706	0.999876	1	1	1	1	1	1
265.15188_4.387_5.34	0.514143	0.419497	0.649194	0.997947	0.799855	0.99955	0.688193	0.992318	0.869935	0.94968	0.6466	0.999876	1	1	1	1	1	1
457.29203_35.157_7.76	0.336314	0.73367	0.958219	0.853257	0.992118	0.79098	0.966405	0.99644	0.925672	0.94968	0.860897	0.999876	1	1	1	1	1	1
307.11871_31.002_4.74	0.331479	0.0706912	0.445419	0.63326	0.860395	0.860395	0.251518	0.251518	1	0.94968	0.307824	0.999876	1	1	1	1	1	1
465.31693_35.334_7.86	0.308708	0.455187	0.0551289	0.189623	0.7698	1	0.7575	0.233376	0.796096	0.94968	0.672286	0.999876	1	1	1	1	1	1
531.26471_10.250_7.09	0.385577	0.64321	0.523041	0.702236	0.998898	0.996207	0.819602	0.856026	0.99987	0.94968	0.811338	0.999876	1	1	1	1	1	1
687.52571_13.747_9.24	0.550608	8.98913e-07	0.419991	0.591731	0.00010296	0.00010296	0.000591361	0.000591361	1	0.94968	0.000507562	0.999876	1	0.0730205	0.0730205	0.163659	0.211952	1
201.11014_36.672_4.41	0.855255	0.602174	0.0933639	0.74815	0.793724	0.911726	0.999999	0.39444	0.463289	0.96328	0.790699	0.999876	1	1	1	1	1	1
227.17576_9.517_4.04	0.792156	0.22128	0.116082	0.835778	0.988534	0.611503	0.967311	0.205385	0.473676	0.96328	0.488248	0.999876	1	1	1	1	1	1
480.83581_31.048_6.70	0.756843	0.968846	0.274916	0.763943	0.832723	0.998638	0.999976	0.872236	0.912273	0.96328	0.987191	0.999876	1	1	1	1	1	1
321.89446_27.023_4.73	0.622115	0.0315219	0.487678	1	0.676419	0.19172	0.650276	0.167436	0.785914	0.960624	0.257814	0.999876	1	1	1	1	1	1
220.99359_30.655_4.28	0.585725	0.327179	0.0464782	0.776643	0.824356	0.583459	1	0.158747	0.217475	0.950761	0.593207	0.999876	1	1	1	1	1	1
242.88552_19.568_4.32	0.326614	0.147993	0.809413	0.909699	0.814756	0.303059	0.990755	0.59501	0.810086	0.94968	0.402773	0.999876	1	1	1	1	1	1
309.61654_30.689_4.69	0.363655	0.761855	0.21188	0.999238	0.885318	0.768346	0.919008	0.679441	0.403601	0.94968	0.875036	0.999876	1	1	1	1	1	1
333.27644_33.182_6.44	0.0815605	0.30432	0.322305	0.859063	1	0.188089	0.88004	0.474993	0.22371	0.899616	0.573025	0.999876	1	1	1	1	1	1
400.25432_10.893_6.39	0.216356	0.92814	0.39433	0.976598	0.897209	0.811181	0.69291	0.947283	0.460526	0.94968	0.977197	0.999876	1	1	1	1	1	1
226.95188_36.191_4.63	0.817321	0.914507	0.575623	0.997453	0.986332	0.99151	0.998124	0.963352	0.933372	0.96328	0.969784	0.999876	1	1	1	1	1	1
273.04219_27.373_4.92	0.677147	0.97463	0.0969699	0.839214	0.577912	0.97604	0.939486	0.633608	0.397708	0.96328	0.990607	0.999876	1	1	1	1	1	1
172.09716_1.333_4.02	0.0186334	0.0740873	0.084496	0.822293	1	0.0205848	0.847875	0.0748136	0.0287088	0.808999	0.307824	0.999876	1	1	0.889512	1	1	1
275.88918_7.178_4.24	0.88269	0.146957	0.302114	0.872379	0.99111	0.70049	0.745187	0.292646	0.871476	0.96328	0.402773	0.999876	1	1	1	1	1	1
277.10935_15.778_5.24	0.960156	0.15083	0.238308	0.85977	0.998336	0.659854	0.800773	0.252608	0.782026	0.975896	0.40729	0.999876	1	1	1	1	1	1
218.10849_36.774_4.46	0.469723	0.699903	0.790565	0.977484	0.999824	0.846824	0.990706	0.964395	0.895949	0.94968	0.840456	0.999876	1	1	1	1	1	1
228.32187_4.105_4.83	0.798242	0.892106	0.525009	0.996012	0.981577	0.987074	0.997817	0.944932	0.907693	0.96328	0.959423	0.999876	1	1	1	1	1	1
450.70349_30.699_5.58	0.255094	0.273425	0.398232	0.981889	0.998426	0.355974	0.997831	0.505547	0.482541	0.94968	0.544558	0.999876	1	1	1	1	1	1
271.24247_35.277_5.62	0.481199	0.732953	0.904589	0.962217	0.99866	0.872603	0.990996	0.986524	0.938877	0.94968	0.860594	0.999876	1	1	1	1	1	1
710.41672_12.765_8.79	0.765125	0.994029	0.586151	0.999154	0.976532	0.994447	0.990327	0.980567	0.924055	0.96328	0.998706	0.999876	1	1	1	1	1	1
519.37044_35.152_8.50	0.544236	0.952853	0.179197	0.526784	0.766141	0.992926	0.991356	0.740389	0.907181	0.94968	0.981415	0.999876	1	1	1	1	1	1
251.92093_3.935_4.38	0.255093	0.163787	0.403751	0.514383	0.978161	0.988351	0.342694	0.381897	0.999851	0.94968	0.41069	0.999876	1	1	1	1	1	1
537.53516_36.608_9.28	0.582214	0.0581137	0.561447	0.878227	0.754767	0.666852	0.343123	0.273233	0.998846	0.950159	0.302446	0.999876	1	1	1	1	1	1
212.01957_19.615_4.24	0.477062	0.0104762	0.831948	0.98893	0.172868	0.407596	0.0899953	0.247071	0.944453	0.94968	0.201605	0.999876	1	1	1	1	1	1
456.16773_32.150_7.63	0.512037	0.0616256	0.632596	0.871825	0.724286	0.728282	0.31079	0.314036	1	0.94968	0.306288	0.999876	1	1	1	1	1	1
150.03749_11.332_3.67	0.438142	0.00035404	0.387787	0.737076	0.0933882	0.0531474	0.0124052	0.0066064	0.990951	0.94968	0.0252431	0.999876	1	1	1	0.509206	0.664816	1
194.00967_20.343_4.08	0.383147	0.000456621	0.459508	0.7388	0.0925163	0.073153	0.0123426	0.00946314	0.999299	0.94968	0.0271309	0.999876	1	1	1	0.509206	0.729429	1
383.27695_32.432_6.67	0.808638	0.149421	0.407845	0.974408	0.373691	0.82333	0.553343	0.956758	0.869907	0.96328	0.404699	0.999876	1	1	1	1	1	1
168.11459_18.373_3.80	0.648338	0.00252251	0.801713	0.978204	0.136179	0.136773	0.0595992	0.0598935	1	0.96328	0.0922334	0.999876	1	1	1	1	1	1
282.91088_26.218_4.68	0.384632	0.153848	0.911106	0.943902	0.681364	0.965518	0.363745	0.749726	0.922679	0.94968	0.407784	0.999876	1	1	1	1	1	1
317.24493_32.234_6.43	0.873332	0.149058	0.420645	0.965061	0.381663	0.79255	0.590115	0.9525	0.899379	0.96328	0.404484	0.999876	1	1	1	1	1	1
225.57625_23.952_5.32	0.373685	9.898e-05	0.881892	0.974462	0.0093953	0.0295876	0.00325177	0.0108047	0.943106	0.94968	0.00998591	0.999876	1	0.765583	1	0.373223	0.767631	1
247.18056_24.691_5.35	0.351449	0.000116505	0.860902	0.970988	0.0101557	0.0354724	0.00340206	0.0126503	0.927486	0.94968	0.0103835	0.999876	1	0.804558	1	0.373223	0.767631	1
232.07606_33.567_4.87	0.857415	0.322711	0.746279	0.97942	0.780744	0.834994	0.924177	0.955837	0.999606	0.96328	0.588474	0.999876	1	1	1	1	1	1
207.00497_18.386_4.12	0.379667	0.000105893	0.828709	0.982622	0.00893984	0.0309319	0.00340245	0.0124804	0.929495	0.94968	0.0100669	0.999876	1	0.765583	1	0.373223	0.767631	1
255.02596_20.554_4.77	0.697658	0.000662526	0.55216	0.994856	0.0183757	0.0608349	0.0220099	0.0754551	0.932252	0.96328	0.0330471	0.999876	1	1	1	0.682307	1	1
265.19109_23.504_5.69	0.773629	0.000442729	0.595198	0.991698	0.0153394	0.0401351	0.0197381	0.0531073	0.964151	0.96328	0.0271309	0.999876	1	0.892814	1	0.639031	1	1
318.30023_25.269_6.80	0.71968	0.000862693	0.801997	0.935053	0.0358053	0.0256274	0.0797133	0.0571895	0.998329	0.96328	0.0406073	0.999876	1	1	1	1	1	1
165.97841_18.363_3.85	0.736433	0.000672067	0.641686	0.997275	0.0223684	0.0562767	0.0247846	0.0642957	0.966864	0.96328	0.0330471	0.999876	1	1	1	0.744059	1	1
213.11017_5.149_4.56	0.863368	0.620941	0.869938	0.995863	0.995518	0.99364	0.96877	0.96251	0.999992	0.96328	0.80096	0.999876	1	1	1	1	1	1
539.21931_30.370_8.06	0.545163	0.276456	0.720871	0.99728	0.726237	0.982767	0.595297	0.941952	0.915383	0.94968	0.547364	0.999876	1	1	1	1	1	1
460.27528_9.075_6.75	0.293678	0.609988	0.410408	0.542268	0.994345	0.990202	0.742892	0.772156	0.999957	0.94968	0.797289	0.999876	1	1	1	1	1	1
305.24640_32.258_6.17	0.533445	0.222738	0.612401	0.863705	0.955645	0.951456	0.601817	0.591417	0.999998	0.94968	0.490539	0.999876	1	1	1	1	1	1
226.13934_18.557_4.44	0.157919	0.603409	0.683698	0.817275	0.999879	0.497874	0.875191	0.906596	0.578693	0.94968	0.791593	0.999876	1	1	1	1	1	1
218.12838_3.825_4.77	0.478363	0.807864	0.837166	0.97636	0.987955	0.986467	0.88881	0.999986	0.922744	0.94968	0.902832	0.999876	1	1	1	1	1	1
610.18421_37.783_8.11	0.556988	0.229807	0.742616	0.997232	0.689679	0.964879	0.555634	0.906734	0.928005	0.94968	0.496879	0.999876	1	1	1	1	1	1
111.09202_36.568_3.42	0.226851	0.332402	0.265961	0.337683	0.446776	0.463886	0.999961	0.999812	0.99999	0.94968	0.595857	0.999876	1	1	1	1	1	1
245.10268_14.209_4.87	0.748745	0.979787	0.827345	0.978678	0.997912	0.99584	0.997699	0.999074	0.999968	0.96328	0.994431	0.999876	1	1	1	1	1	1
480.01166_30.761_7.03	0.319529	0.405392	0.23218	0.397376	0.466758	0.621009	0.999991	0.994512	0.994158	0.94968	0.637013	0.999876	1	1	1	1	1	1
179.99384_18.555_3.93	0.409482	0.00845182	0.552447	0.670056	0.0939125	0.0667958	0.42574	0.328671	0.997894	0.94968	0.192837	0.999876	1	1	1	1	1	1
207.98883_18.556_4.16	0.700094	0.0214687	0.828942	0.950794	0.254241	0.194494	0.451557	0.359014	0.998382	0.96328	0.257814	0.999876	1	1	1	1	1	1
312.25913_32.804_6.34	0.608983	0.568132	0.544034	0.844057	0.82889	0.883223	0.999414	1	0.99943	0.954471	0.765743	0.999876	1	1	1	1	1	1
173.07895_3.403_3.98	0.58065	0.440371	0.778599	0.992874	0.985536	0.7607	0.999577	0.866858	0.92811	0.950159	0.662565	0.999876	1	1	1	1	1	1
539.16484_4.827_7.22	0.518241	0.807398	0.693093	0.873019	0.999387	0.994844	0.934767	0.967055	0.999399	0.94968	0.902832	0.999876	1	1	1	1	1	1
194.00969_18.373_4.08	0.908975	0.00306561	0.467578	0.898034	0.041501	0.0883763	0.110312	0.223302	0.979486	0.96328	0.106624	0.999876	1	1	1	1	1	1
225.99948_18.558_4.44	0.943021	0.0894527	0.808038	0.998638	0.706038	0.585728	0.595979	0.472896	0.997308	0.966749	0.338804	0.999876	1	1	1	1	1	1
219.17461_19.476_5.12	0.169174	0.2359	0.253234	0.299648	1	1	0.351088	0.351088	1	0.94968	0.503098	0.999876	1	1	1	1	1	1
176.11392_2.246_4.31	0.0631816	0.704311	0.693347	0.31257	0.942931	0.396391	0.691371	1	0.746312	0.858066	0.840922	0.999876	1	1	1	1	1	1
295.22655_27.723_6.08	0.165373	0.231645	0.248907	0.292158	1	1	0.343282	0.343282	1	0.94968	0.496879	0.999876	1	1	1	1	1	1
237.93975_16.069_4.31	0.416382	0.665404	0.392085	0.622816	0.783737	0.84349	0.998205	0.990864	0.999454	0.94968	0.824364	0.999876	1	1	1	1	1	1
281.17279_28.610_5.94	0.705092	0.273233	0.525224	0.998198	0.60211	0.956071	0.666917	0.982248	0.890993	0.96328	0.544556	0.999876	1	1	1	1	1	1
149.02377_26.555_3.54	0.491343	0.320923	0.661886	0.992001	0.979066	0.599166	0.998913	0.724233	0.840739	0.94968	0.585963	0.999876	1	1	1	1	1	1
272.19155_22.855_5.47	0.0626229	0.641141	0.628211	0.283909	0.900803	0.366155	0.731861	1	0.78139	0.856353	0.811187	0.999876	1	1	1	1	1	1
335.21948_30.156_6.24	0.331398	0.733815	0.440424	0.583348	0.848182	0.817617	0.982589	0.990241	0.999917	0.94968	0.860897	0.999876	1	1	1	1	1	1
273.19409_23.308_5.47	0.871103	0.461564	0.231754	0.772614	0.50562	0.942202	0.937848	0.988239	0.845385	0.96328	0.678197	0.999876	1	1	1	1	1	1
309.11719_30.722_4.74	0.101588	0.84708	0.852779	0.49563	1	0.730806	0.54715	0.992641	0.760426	0.94968	0.932769	0.999876	1	1	1	1	1	1
475.32450_26.571_7.15	0.927643	0.13583	0.315272	0.853489	0.293296	0.682379	0.657649	0.974988	0.901926	0.96328	0.402773	0.999876	1	1	1	1	1	1
385.17934_33.249_7.28	0.428886	0.033932	0.421732	1	0.164399	0.713939	0.142156	0.689754	0.702154	0.94968	0.257814	0.999876	1	1	1	1	1	1
248.97223_2.816_5.10	0.234013	0.12774	0.296213	0.997766	0.270092	0.99543	0.184521	0.975676	0.418039	0.94968	0.402114	0.999876	1	1	1	1	1	1
377.08892_30.661_6.41	0.241327	0.161007	0.878071	0.865022	0.674575	0.996084	0.267091	0.776575	0.821021	0.94968	0.407897	0.999876	1	1	1	1	1	1
167.91754_9.384_4.05	0.0231178	0.748124	0.738632	0.363912	0.964154	0.449097	0.20643	1	0.272313	0.847723	0.867078	0.999876	1	1	1	1	1	1
249.15763_9.082_7.56	0.651721	0.381298	0.214967	0.62282	0.429861	0.822542	0.963921	0.994422	0.911149	0.96328	0.627278	0.999876	1	1	1	1	1	1
220.11823_2.468_4.77	0.82301	0.632903	0.408985	0.978107	0.778805	0.999194	0.925532	0.995069	0.862808	0.96328	0.808307	0.999876	1	1	1	1	1	1
414.23651_28.356_7.51	0.304597	0.702301	0.961245	0.870512	0.989671	0.968632	0.733984	0.994509	0.888857	0.94968	0.840874	0.999876	1	1	1	1	1	1
324.25336_32.971_6.39	0.924984	0.161288	0.311622	0.910824	0.321957	0.795902	0.619553	0.986441	0.846697	0.96328	0.407897	0.999876	1	1	1	1	1	1
508.33276_31.485_7.73	0.454513	0.355705	0.0581266	0.860454	0.185715	1	0.468799	0.88125	0.221126	0.94968	0.613452	0.999876	1	1	1	1	1	1
239.18300_11.543_5.10	0.59636	0.950906	0.630387	0.999736	0.977961	0.982783	0.958659	0.990652	0.886438	0.953232	0.980553	0.999876	1	1	1	1	1	1
589.32217_26.869_7.92	0.566591	0.982657	0.718827	0.996803	0.992039	0.975097	0.961655	0.995019	0.910805	0.94968	0.994779	0.999876	1	1	1	1	1	1
426.19717_14.349_6.67	0.92976	0.765691	0.523223	0.982388	0.902537	0.999553	0.982948	0.995256	0.946239	0.96328	0.87571	0.999876	1	1	1	1	1	1
311.22127_28.557_6.21	0.0573526	0.0988336	0.111065	0.0836001	1	1	0.111346	0.111346	1	0.847723	0.35988	0.999876	1	1	1	1	1	1
304.89071_10.191_4.46	0.272517	0.409882	0.0554321	0.171942	0.800615	1	0.691094	0.213745	0.82406	0.94968	0.640188	0.999876	1	1	1	1	1	1
311.22168_28.993_6.30	0.17355	0.271617	0.842129	0.649751	0.915531	0.999063	0.322596	0.771949	0.87897	0.94968	0.542602	0.999876	1	1	1	1	1	1
329.19585_25.190_6.04	0.0106053	0.214365	0.231289	0.0414732	1	0.773743	0.0586577	0.311599	0.799685	0.549935	0.478755	0.999876	1	1	1	1	1	1
453.28966_1.288_7.43	0.470573	0.227954	0.572699	0.808114	0.967403	0.968709	0.569439	0.573467	1	0.94968	0.496879	0.999876	1	1	1	1	1	1
349.04355_9.545_5.40	0.666055	0.273015	0.0491231	0.363634	0.873722	0.897816	0.853357	0.141172	0.533787	0.96328	0.544556	0.999876	1	1	1	1	1	1
390.09727_21.782_6.29	0.868009	0.494368	0.0592978	0.500108	0.760113	0.943782	0.988242	0.261437	0.483705	0.96328	0.700764	0.999876	1	1	1	1	1	1
593.70656_24.114_8.07	0.573678	0.477009	0.797388	0.991026	0.98848	0.782556	0.999932	0.892845	0.932462	0.950159	0.689909	0.999876	1	1	1	1	1	1
253.14113_26.865_5.63	0.0866227	0.368033	0.38591	0.833669	1	0.231505	0.857862	0.583897	0.270417	0.899616	0.620601	0.999876	1	1	1	1	1	1
493.15500_4.523_7.38	0.509198	0.0288187	0.374292	1	0.7426	0.145308	0.72009	0.124676	0.632807	0.94968	0.257814	0.999876	1	1	1	1	1	1
475.06692_30.800_6.93	0.0437175	0.666872	0.67866	0.511876	1	0.285494	0.562799	0.927531	0.327221	0.847723	0.825127	0.999876	1	1	1	1	1	1
151.03926_5.273_3.60	0.753129	0.916601	0.521215	0.997814	0.977623	0.984814	0.994555	0.949861	0.8915	0.96328	0.971079	0.999876	1	1	1	1	1	1
359.14902_19.420_6.32	0.534015	0.68989	0.910098	0.973801	0.997069	0.879524	0.9975	0.981654	0.954768	0.94968	0.838274	0.999876	1	1	1	1	1	1
219.10204_14.214_4.65	0.838242	0.937118	0.586045	0.996966	0.985277	0.99461	0.998179	0.969835	0.94233	0.96328	0.978371	0.999876	1	1	1	1	1	1
308.99346_5.273_5.47	0.77334	0.92749	0.509922	0.996413	0.973791	0.987997	0.995009	0.949198	0.89315	0.96328	0.977171	0.999876	1	1	1	1	1	1
601.86955_24.136_8.09	0.800088	0.846663	0.100462	0.779057	0.519589	0.998035	0.941864	0.711129	0.466507	0.96328	0.93267	0.999876	1	1	1	1	1	1
280.99820_5.272_5.31	0.748422	0.920524	0.490428	0.996651	0.97072	0.984213	0.993523	0.941409	0.87432	0.96328	0.973067	0.999876	1	1	1	1	1	1
267.96713_5.271_5.24	0.77654	0.942744	0.503006	0.995826	0.969802	0.989668	0.994235	0.950822	0.891108	0.96328	0.978371	0.999876	1	1	1	1	1	1
130.06794_1.087_4.24	0.32655	0.692941	0.198523	0.999711	0.899224	0.698443	0.920329	0.622575	0.361218	0.94968	0.838274	0.999876	1	1	1	1	1	1
223.11537_1.096_4.65	0.532601	0.995778	0.173502	0.510233	0.737248	0.988289	0.993559	0.754641	0.906586	0.94968	0.998706	0.999876	1	1	1	1	1	1
1193.44537_3.540_10.74	0.506108	0.0588186	0.654365	0.877686	0.701432	0.723144	0.298405	0.315643	0.999983	0.94968	0.303861	0.999876	1	1	1	1	1	1
387.10527_7.485_6.59	0.640715	0.263157	0.653739	0.999995	0.673968	0.962571	0.634353	0.952872	0.923045	0.96328	0.533043	0.999876	1	1	1	1	1	1
173.07906_1.837_3.98	0.503131	0.0713107	0.609087	0.856033	0.768484	0.764102	0.332909	0.329047	1	0.94968	0.307824	0.999876	1	1	1	1	1	1
557.16910_30.682_4.90	0.775668	0.430868	0.792943	0.973903	0.873626	0.86946	0.979429	0.977853	1	0.96328	0.656779	0.999876	1	1	1	1	1	1
409.29194_33.089_7.34	0.867619	0.598007	0.877742	0.996479	0.99352	0.991458	0.964541	0.9586	0.999995	0.96328	0.789437	0.999876	1	1	1	1	1	1
508.96834_9.536_6.52	0.209877	0.0337442	0.912113	0.66754	0.357136	0.0870958	0.898584	0.404849	0.837393	0.94968	0.257814	0.999876	1	1	1	1	1	1
279.58900_30.704_4.70	0.457622	0.147275	0.440645	0.66809	0.392236	0.426089	0.924282	0.94458	0.999912	0.94968	0.402773	0.999876	1	1	1	1	1	1
279.07298_4.640_5.41	0.288569	0.110952	0.94432	0.842631	0.681359	0.962637	0.253705	0.594719	0.926848	0.94968	0.383559	0.999876	1	1	1	1	1	1
221.12013_3.601_4.75	0.0176425	0.997138	0.997246	0.222704	1	0.301409	0.269519	1	0.343729	0.808999	0.998706	0.999876	1	1	1	1	1	1
177.05497_8.978_4.03	0.287103	0.688647	0.93404	0.867207	0.98546	0.965184	0.707291	0.995168	0.867048	0.94968	0.838274	0.999876	1	1	1	1	1	1
169.03598_1.012_3.94	0.344421	0.804711	0.956557	0.890261	0.999089	0.827273	0.950611	0.996087	0.901659	0.94968	0.901695	0.999876	1	1	1	1	1	1
301.16479_20.164_5.67	0.00815272	0.758734	0.584812	0.25426	0.924321	0.267135	0.107573	0.998423	0.120871	0.549935	0.872896	0.999876	1	1	1	1	1	1
267.01768_9.520_4.58	0.0286299	0.248012	0.976102	0.286305	0.848098	0.0951529	0.805095	0.811484	0.391748	0.847723	0.518129	0.999876	1	1	1	1	1	1
304.89053_16.090_4.47	0.295362	0.8139	0.383428	0.994483	0.96217	0.758298	0.883004	0.855513	0.522016	0.94968	0.90709	0.999876	1	1	1	1	1	1
424.06673_16.487_6.28	0.144474	0.310022	0.708482	0.52972	0.967829	0.993345	0.326354	0.73983	0.902976	0.94968	0.577142	0.999876	1	1	1	1	1	1
310.14987_8.501_5.49	0.0588618	0.585687	0.895524	0.492237	0.961811	0.747476	0.286611	0.989366	0.510403	0.847723	0.780551	0.999876	1	1	1	1	1	1
338.18109_8.499_5.79	0.0133806	0.311028	0.825821	0.158161	0.940754	0.670039	0.0719294	0.799477	0.397273	0.681455	0.578638	0.999876	1	1	1	1	1	1
255.08426_9.534_4.83	0.162962	0.768097	0.663116	0.846908	0.950841	0.842688	0.569279	0.99971	0.58739	0.94968	0.876596	0.999876	1	1	1	1	1	1
307.03282_9.232_4.95	0.062042	0.589421	0.878905	0.51235	0.959202	0.754998	0.295487	0.991156	0.511519	0.856353	0.783959	0.999876	1	1	1	1	1	1
615.71923_24.178_8.28	0.528828	0.328334	0.736534	0.99542	0.780192	0.99338	0.634856	0.960041	0.914	0.94968	0.594545	0.999876	1	1	1	1	1	1
364.19670_23.660_6.17	0.0242819	0.122107	0.261531	0.703229	0.239738	0.923321	0.034831	0.981802	0.106805	0.847723	0.402114	0.999876	1	1	1	0.861911	1	1
315.18007_23.439_5.85	0.00207121	0.0239717	0.392346	0.17921	0.124924	0.854705	0.00215201	0.636859	0.0392667	0.549935	0.257814	0.999876	1	1	1	0.30639	1	1
313.12590_13.470_5.55	0.0310756	0.125692	0.823492	0.406807	0.583912	0.963844	0.0539584	0.745519	0.371914	0.847723	0.402114	0.999876	1	1	1	1	1	1
369.15206_23.661_6.07	0.0211902	0.139999	0.782015	0.349841	0.586585	0.911573	0.044516	0.790748	0.293715	0.846347	0.402773	0.999876	1	1	1	0.913169	1	1
329.15963_23.661_5.86	0.037611	0.0461671	0.429686	0.678423	0.200273	0.999944	0.0256208	0.74983	0.219172	0.847723	0.28255	0.999876	1	1	1	0.761152	1	1
598.36345_24.157_8.24	0.41425	0.152311	0.877673	0.961515	0.660703	0.956772	0.378389	0.763732	0.923925	0.94968	0.40729	0.999876	1	1	1	1	1	1
608.21379_24.157_8.23	0.258341	0.156462	0.941853	0.856807	0.701947	0.992843	0.279812	0.738583	0.86399	0.94968	0.407888	0.999876	1	1	1	1	1	1
635.55086_24.265_8.66	0.492717	0.0693445	0.59304	0.999479	0.334069	0.80947	0.260083	0.734499	0.84669	0.94968	0.307824	0.999876	1	1	1	1	1	1
263.02158_4.123_4.60	0.00782008	0.00372272	0.098456	0.715415	0.0113836	0.994811	0.00122001	0.606557	0.0256853	0.549935	0.113315	0.999876	1	0.823003	1	0.18313	1	1
331.15395_14.898_6.42	0.760364	0.55033	0.580816	0.998683	0.839266	0.997667	0.887564	0.999956	0.926457	0.96328	0.749185	0.999876	1	1	1	1	1	1
169.04988_5.272_4.05	0.767461	0.854048	0.991338	0.994795	0.999024	0.985827	0.999778	0.99923	0.997346	0.96328	0.938203	0.999876	1	1	1	1	1	1
554.28061_9.956_7.75	0.767628	0.878789	0.799611	0.977269	0.99081	0.990441	0.999862	0.999885	1	0.96328	0.951682	0.999876	1	1	1	1	1	1
276.05313_30.770_6.34	0.316202	0.337734	0.836477	0.775031	0.83565	0.512196	0.999993	0.940079	0.946956	0.94968	0.599762	0.999876	1	1	1	1	1	1
396.22301_35.152_7.41	0.528512	0.441131	0.155498	0.467548	0.394309	0.807435	0.990886	0.965184	0.897949	0.94968	0.662565	0.999876	1	1	1	1	1	1
523.30482_31.559_7.91	0.874134	0.258284	0.826859	0.989531	0.765342	0.782338	0.885481	0.898406	0.99999	0.96328	0.52767	0.999876	1	1	1	1	1	1
397.21592_35.152_7.40	0.792365	0.64663	0.265104	0.766889	0.660645	0.972463	0.990978	0.96545	0.898744	0.96328	0.813266	0.999876	1	1	1	1	1	1
452.06132_15.023_6.19	0.135301	0.902022	0.716713	0.498777	0.997847	0.773054	0.660671	0.985127	0.878958	0.94968	0.963613	0.999876	1	1	1	1	1	1
298.13070_9.379_5.36	0.138646	0.954934	0.711565	0.501081	0.995424	0.751988	0.694561	0.989968	0.884206	0.94968	0.982377	0.999876	1	1	1	1	1	1
357.65924_15.804_5.75	0.138549	0.913368	0.726144	0.509374	0.997818	0.771985	0.671388	0.987418	0.878494	0.94968	0.969784	0.999876	1	1	1	1	1	1
371.13138_15.578_5.82	0.14094	0.890131	0.703512	0.502793	0.997758	0.788515	0.666072	0.982011	0.891089	0.94968	0.959069	0.999876	1	1	1	1	1	1
305.03209_8.800_4.97	0.139492	0.912141	0.705568	0.500642	0.997053	0.77529	0.674724	0.98497	0.888324	0.94968	0.96976	0.999876	1	1	1	1	1	1
364.04553_9.031_5.56	0.143122	0.943563	0.707015	0.507218	0.995741	0.765109	0.697045	0.98847	0.891191	0.94968	0.978371	0.999876	1	1	1	1	1	1
159.06556_16.492_3.92	0.0371043	0.582521	0.450027	0.162312	0.998194	0.696172	0.266177	0.782801	0.814672	0.847723	0.779244	0.999876	1	1	1	1	1	1
275.36713_16.489_5.21	0.0412206	0.628311	0.472129	0.180284	0.997503	0.687711	0.299368	0.821289	0.817018	0.847723	0.805367	0.999876	1	1	1	1	1	1
275.58993_16.489_5.21	0.0421499	0.63473	0.479792	0.185304	0.997614	0.687835	0.304956	0.828949	0.815759	0.847723	0.80881	0.999876	1	1	1	1	1	1
354.10702_16.498_4.43	0.0451843	0.569581	0.490059	0.198274	0.999545	0.741297	0.286628	0.80009	0.822443	0.847723	0.767333	0.999876	1	1	1	1	1	1
406.05631_9.539_6.04	0.162112	0.930676	0.698729	0.536075	0.995916	0.799109	0.722042	0.986254	0.912793	0.94968	0.977541	0.999876	1	1	1	1	1	1
380.19160_15.025_6.14	0.135492	0.971428	0.739381	0.508896	0.996129	0.736612	0.694301	0.993485	0.868132	0.94968	0.98841	0.999876	1	1	1	1	1	1
275.26703_15.805_5.05	0.042688	0.63816	0.464593	0.181765	0.996677	0.689596	0.310088	0.821959	0.827462	0.847723	0.8104	0.999876	1	1	1	1	1	1
117.05504_9.066_4.71	0.0410759	0.638701	0.461211	0.176207	0.996449	0.681504	0.304401	0.820249	0.823215	0.847723	0.8104	0.999876	1	1	1	1	1	1
638.15059_9.381_7.98	0.296994	0.912811	0.972028	0.831399	0.999591	0.845139	0.900271	0.999936	0.903723	0.94968	0.969784	0.999876	1	1	1	1	1	1
275.36708_9.047_5.15	0.137476	0.929322	0.736288	0.512126	0.997663	0.761644	0.676601	0.98995	0.872569	0.94968	0.977541	0.999876	1	1	1	1	1	1
459.35189_10.489_7.25	0.306291	0.347618	0.994591	0.838361	0.907733	0.5021	0.999751	0.894141	0.886878	0.94968	0.607446	0.999876	1	1	1	1	1	1
347.04266_15.801_5.33	0.042247	0.622953	0.449439	0.175817	0.996503	0.697915	0.303347	0.80488	0.835662	0.847723	0.802466	0.999876	1	1	1	1	1	1
392.04033_16.506_6.03	0.0562537	0.704229	0.483674	0.222998	0.994328	0.70691	0.387637	0.863712	0.858989	0.847723	0.840922	0.999876	1	1	1	1	1	1
298.13060_9.234_5.38	0.146818	0.943723	0.723669	0.522415	0.996587	0.769679	0.701552	0.990082	0.888218	0.94968	0.978371	0.999876	1	1	1	1	1	1
275.30938_9.047_5.15	0.13523	0.919701	0.733127	0.506528	0.997862	0.763068	0.667909	0.98876	0.871417	0.94968	0.972716	0.999876	1	1	1	1	1	1
275.58995_9.048_5.15	0.136671	0.920925	0.729815	0.507538	0.997704	0.764978	0.671525	0.988552	0.87458	0.94968	0.97313	0.999876	1	1	1	1	1	1
263.02139_9.378_4.61	0.143213	0.934873	0.725273	0.516965	0.997021	0.768527	0.690743	0.989431	0.883793	0.94968	0.977897	0.999876	1	1	1	1	1	1
640.15634_9.541_7.90	0.287147	0.821731	0.987955	0.827339	0.998171	0.794312	0.92225	0.998623	0.890723	0.94968	0.913675	0.999876	1	1	1	1	1	1
468.20769_20.444_6.97	0.231163	0.764646	0.395114	0.446947	0.833611	0.748674	0.943184	0.979515	0.998615	0.94968	0.87571	0.999876	1	1	1	1	1	1
349.14958_14.453_6.00	0.274708	0.841801	0.940416	0.796451	0.997229	0.795993	0.911582	0.999692	0.90125	0.94968	0.929829	0.999876	1	1	1	1	1	1
431.15247_14.691_6.58	0.456809	0.86706	0.181932	0.470439	0.809806	0.991345	0.965186	0.698839	0.938963	0.94968	0.945849	0.999876	1	1	1	1	1	1
364.04544_9.380_5.57	0.145421	0.928805	0.731603	0.524357	0.997504	0.77455	0.690709	0.98947	0.883628	0.94968	0.977473	0.999876	1	1	1	1	1	1
364.04549_9.233_5.56	0.142658	0.934384	0.724548	0.515597	0.997009	0.767959	0.689616	0.989317	0.883494	0.94968	0.977897	0.999876	1	1	1	1	1	1
639.15421_9.542_7.90	0.0454056	0.650537	0.46451	0.188919	0.996056	0.695013	0.325906	0.828166	0.837372	0.847723	0.815172	0.999876	1	1	1	1	1	1
345.11580_10.650_5.63	0.042907	0.618629	0.453075	0.178853	0.996923	0.703473	0.303586	0.804802	0.835967	0.847723	0.80096	0.999876	1	1	1	1	1	1
391.15995_21.074_6.32	0.082672	0.993525	0.179551	0.13582	0.740472	0.655704	0.681685	0.768004	0.998993	0.899616	0.998706	0.999876	1	1	1	1	1	1
391.16002_14.029_6.34	0.140374	0.518659	0.0460403	0.0813268	0.222374	0.535228	0.984528	0.733971	0.923711	0.94968	0.719813	0.999876	1	1	1	1	1	1
283.11543_9.873_5.22	0.0999971	0.323756	0.762131	0.463969	0.961181	0.971079	0.266166	0.779454	0.817528	0.94968	0.589248	0.999876	1	1	1	1	1	1
341.12099_17.191_5.67	0.265837	0.595819	0.975124	0.835696	0.977762	0.977262	0.635986	0.982248	0.871318	0.94968	0.788659	0.999876	1	1	1	1	1	1
325.12592_17.482_5.56	0.101599	0.339419	0.722489	0.447905	0.973584	0.968412	0.281114	0.77249	0.839652	0.94968	0.600883	0.999876	1	1	1	1	1	1
617.37498_24.188_8.35	0.851067	0.522872	0.983807	0.999512	0.96484	0.985779	0.93377	0.967191	0.999342	0.96328	0.723564	0.999876	1	1	1	1	1	1
610.03741_24.168_8.31	0.561103	0.295203	0.758532	0.924852	0.951335	0.976985	0.679471	0.75246	0.999404	0.94968	0.564413	0.999876	1	1	1	1	1	1
579.52132_24.079_7.99	0.697555	0.331846	0.757711	0.964366	0.964744	0.962355	0.790035	0.78396	1	0.96328	0.595835	0.999876	1	1	1	1	1	1
584.18763_24.115_8.16	0.896312	0.248989	0.795523	0.988929	0.739639	0.785137	0.867531	0.902582	0.999813	0.96328	0.518129	0.999876	1	1	1	1	1	1
613.20342_24.211_8.48	0.82914	0.143102	0.990674	0.999327	0.716295	0.768329	0.625047	0.682251	0.99974	0.96328	0.402773	0.999876	1	1	1	1	1	1
584.01993_24.121_8.17	0.85528	0.194167	0.999876	0.999685	0.782852	0.826368	0.713398	0.763082	0.999801	0.96328	0.445864	0.999876	1	1	1	1	1	1
608.70580_24.174_8.28	0.960853	0.179331	0.942277	0.999926	0.735105	0.762676	0.743017	0.771392	0.99996	0.975909	0.424463	0.999876	1	1	1	1	1	1
628.04552_24.244_8.52	0.928064	0.134769	0.987445	1	0.690488	0.706112	0.662127	0.678595	0.999994	0.96328	0.402773	0.999876	1	1	1	1	1	1
591.52550_24.138_8.20	0.777304	0.135205	0.995192	0.998217	0.700504	0.780654	0.581964	0.670402	0.999054	0.96328	0.402773	0.999876	1	1	1	1	1	1
576.51490_24.102_8.18	0.858971	0.167309	0.957677	0.999945	0.726432	0.793223	0.67427	0.747114	0.999415	0.96328	0.411487	0.999876	1	1	1	1	1	1
620.70794_24.225_8.46	0.786414	0.152637	0.980011	0.998027	0.737001	0.802814	0.618147	0.692946	0.999418	0.96328	0.40729	0.999876	1	1	1	1	1	1
631.05301_24.226_8.49	0.832384	0.138525	0.993709	0.999569	0.700354	0.760013	0.617318	0.682196	0.999622	0.96328	0.402773	0.999876	1	1	1	1	1	1
613.53801_24.201_8.37	0.845194	0.152166	0.948331	0.999933	0.698678	0.778255	0.642472	0.728548	0.99908	0.96328	0.40729	0.999876	1	1	1	1	1	1
583.85269_24.127_8.25	0.830506	0.146002	0.988478	0.999312	0.722173	0.772221	0.630914	0.686144	0.999765	0.96328	0.402773	0.999876	1	1	1	1	1	1
591.19041_24.145_8.25	0.823185	0.153818	0.995708	0.999389	0.726227	0.788608	0.637966	0.707289	0.999528	0.96328	0.407784	0.999876	1	1	1	1	1	1
598.52816_24.170_8.36	0.846165	0.155505	0.997273	0.999663	0.72962	0.78017	0.653443	0.709217	0.999751	0.96328	0.407888	0.999876	1	1	1	1	1	1
598.69480_24.168_8.29	0.843486	0.172576	0.976051	0.99978	0.743332	0.806432	0.675432	0.745673	0.999476	0.96328	0.416933	0.999876	1	1	1	1	1	1
606.03242_24.184_8.33	0.863847	0.157275	0.930977	0.999	0.768792	0.77046	0.673308	0.675188	1	0.96328	0.407888	0.999876	1	1	1	1	1	1
591.35731_24.145_8.24	0.836455	0.152568	0.99843	0.999512	0.727351	0.780128	0.643895	0.702264	0.999718	0.96328	0.40729	0.999876	1	1	1	1	1	1
594.19660_24.125_8.10	0.878735	0.127917	0.957231	0.999645	0.707614	0.715066	0.628739	0.63674	0.999999	0.96328	0.402126	0.999876	1	1	1	1	1	1
601.53424_24.147_8.19	0.847535	0.171472	0.973628	0.999333	0.767268	0.800497	0.681249	0.718994	0.99992	0.96328	0.416203	0.999876	1	1	1	1	1	1
579.68932_24.064_7.92	0.883416	0.192769	0.944308	0.999462	0.807859	0.809513	0.731981	0.733894	1	0.96328	0.443817	0.999876	1	1	1	1	1	1
638.39038_24.244_8.50	0.825483	0.133547	0.972206	0.998993	0.709772	0.752901	0.608252	0.65535	0.999857	0.96328	0.402773	0.999876	1	1	1	1	1	1
608.87190_24.167_8.21	0.863175	0.188517	0.93097	0.998902	0.809193	0.812774	0.717301	0.721509	1	0.96328	0.438182	0.999876	1	1	1	1	1	1
616.20964_24.190_8.28	0.907199	0.132731	0.980856	0.999997	0.683334	0.713295	0.646547	0.67822	0.999955	0.96328	0.402773	0.999876	1	1	1	1	1	1
623.71516_24.205_8.41	0.833491	0.154767	0.967079	0.999778	0.712689	0.786698	0.642163	0.7233	0.999233	0.96328	0.407888	0.999876	1	1	1	1	1	1
616.37746_24.183_8.30	0.8661	0.159473	0.992351	0.999761	0.740914	0.776025	0.671539	0.710247	0.999916	0.96328	0.407888	0.999876	1	1	1	1	1	1
587.02696_24.090_7.96	0.821905	0.170032	0.98006	0.99895	0.762105	0.81061	0.664521	0.720115	0.999749	0.96328	0.414428	0.999876	1	1	1	1	1	1
623.54794_24.211_8.35	0.888628	0.131911	0.997113	0.999949	0.690567	0.720192	0.636696	0.668251	0.999956	0.96328	0.402773	0.999876	1	1	1	1	1	1
594.36465_24.115_8.08	0.85405	0.166609	0.982827	0.999546	0.755993	0.791368	0.676739	0.716402	0.999908	0.96328	0.41069	0.999876	1	1	1	1	1	1
601.70223_24.138_8.13	0.860994	0.186009	0.963369	0.999381	0.790856	0.812379	0.709569	0.734363	0.999976	0.96328	0.434479	0.999876	1	1	1	1	1	1
609.03975_24.160_8.19	0.857484	0.157629	0.98857	0.999819	0.728308	0.778433	0.662035	0.717007	0.999759	0.96328	0.407888	0.999876	1	1	1	1	1	1
334.02484_1.293_5.37	0.546369	0.898666	0.62126	0.852953	0.967953	0.963206	0.991999	0.993829	0.999996	0.94968	0.961555	0.999876	1	1	1	1	1	1
129.43199_2.004_3.71	0.556347	0.898845	0.611789	0.854191	0.965957	0.965724	0.993022	0.993112	1	0.94968	0.961555	0.999876	1	1	1	1	1	1
271.66170_23.373_5.47	0.739299	0.918949	0.770074	0.969141	0.998915	0.999112	0.99272	0.991935	1	0.96328	0.972716	0.999876	1	1	1	1	1	1
446.19485_30.695_5.38	0.757035	0.995941	0.771034	0.972098	0.996581	0.997522	0.997584	0.996617	0.999997	0.96328	0.998706	0.999876	1	1	1	1	1	1
372.34714_30.439_7.27	0.713933	0.935606	0.767598	0.963147	0.998478	0.998098	0.991949	0.992987	0.999999	0.96328	0.977897	0.999876	1	1	1	1	1	1
397.29276_35.669_6.63	0.556084	0.277711	0.669909	0.996455	0.965008	0.598787	0.991444	0.687309	0.873384	0.94968	0.548342	0.999876	1	1	1	1	1	1
243.13566_29.794_5.81	0.904213	0.656229	0.897533	0.997313	0.976021	0.977181	0.994687	0.995144	1	0.96328	0.819066	0.999876	1	1	1	1	1	1
239.14900_16.260_4.86	0.0542353	0.394755	0.376939	0.77224	0.598375	0.820712	0.163685	1	0.223272	0.847723	0.630766	0.999876	1	1	1	1	1	1
232.02903_29.305_3.92	0.123116	0.00440133	0.104116	1	0.0133058	0.655546	0.0101051	0.62843	0.147624	0.94968	0.119549	0.999876	1	0.843289	1	0.509206	1	1
486.37858_31.818_7.83	0.0806857	0.0637739	0.0550903	1	0.0495906	1	0.0400385	1	0.0653315	0.899616	0.306288	0.999876	1	1	1	0.864096	1	1
642.23407_26.867_7.94	0.568641	0.423541	0.63669	0.999618	0.795808	0.99853	0.724662	0.993678	0.887251	0.94968	0.650479	0.999876	1	1	1	1	1	1
239.14900_10.413_4.79	0.886608	0.155279	0.292364	0.913615	0.300842	0.806533	0.585722	0.988029	0.815415	0.96328	0.407888	0.999876	1	1	1	1	1	1
422.22444_31.591_7.61	0.466189	0.0347127	0.464626	1	0.182179	0.68948	0.158573	0.663989	0.758358	0.94968	0.257814	0.999876	1	1	1	1	1	1
413.29030_33.223_7.43	0.248052	0.792761	0.260627	0.998921	0.736195	0.886354	0.635098	0.924776	0.376749	0.94968	0.894011	0.999876	1	1	1	1	1	1
757.16374_30.667_9.05	0.559291	0.997379	0.726715	0.995988	0.993981	0.97055	0.964061	0.99432	0.910866	0.94968	0.998706	0.999876	1	1	1	1	1	1
259.15172_36.695_5.10	0.879055	0.646735	0.446173	0.976332	0.811075	0.998172	0.947627	0.996793	0.902644	0.96328	0.813266	0.999876	1	1	1	1	1	1
388.26136_27.902_6.38	0.544138	0.994756	0.743077	0.994002	0.995171	0.967277	0.961593	0.995149	0.911407	0.94968	0.998706	0.999876	1	1	1	1	1	1
284.17890_4.240_5.29	0.00111529	0.669074	0.656987	0.0651368	0.921184	0.105395	0.026053	1	0.0445942	0.549935	0.826614	0.999876	1	1	1	0.761906	1	1
398.21786_35.157_7.29	0.0437854	0.694594	0.439275	0.167853	0.829845	0.341419	0.647328	0.993393	0.83536	0.847723	0.838274	0.999876	1	1	1	1	1	1
360.15674_11.161_6.43	0.582355	0.669387	0.590653	0.867055	0.999687	0.999994	0.922844	0.897432	0.999897	0.950159	0.826614	0.999876	1	1	1	1	1	1
413.23148_33.193_7.36	0.214189	0.0736903	0.941952	0.769897	0.588704	0.955427	0.158071	0.497106	0.883397	0.94968	0.307824	0.999876	1	1	1	1	1	1
579.23766_1.997_8.89	0.778082	0.390762	0.804972	0.984573	0.972092	0.965861	0.863221	0.848267	0.99999	0.96328	0.629384	0.999876	1	1	1	1	1	1
214.17085_12.256_4.75	0.511071	0.174893	0.652552	0.998376	0.565933	0.949537	0.448799	0.892505	0.877478	0.94968	0.41986	0.999876	1	1	1	1	1	1
295.22674_28.842_6.08	0.185032	0.0890136	0.937653	0.727178	0.634026	0.981799	0.15994	0.538318	0.858239	0.94968	0.338289	0.999876	1	1	1	1	1	1
213.16729_29.184_4.73	0.78633	0.665677	0.336008	0.834269	0.975796	0.996591	0.983127	0.747958	0.934007	0.96328	0.824364	0.999876	1	1	1	1	1	1
246.13966_35.910_4.82	0.871099	0.905529	0.249974	0.801012	0.780996	0.99957	0.999148	0.878264	0.854153	0.96328	0.965446	0.999876	1	1	1	1	1	1
263.02093_1.637_4.65	0.406046	0.599816	0.116765	0.334135	0.423155	0.834465	1	0.867615	0.898148	0.94968	0.789786	0.999876	1	1	1	1	1	1
187.09457_35.951_4.17	0.905451	0.90212	0.481992	0.981615	0.971886	0.995462	0.999627	0.93354	0.920835	0.96328	0.963613	0.999876	1	1	1	1	1	1
299.27089_18.245_5.64	0.849673	0.891978	0.126017	0.803567	0.711264	0.983162	0.993066	0.622532	0.541547	0.96328	0.959423	0.999876	1	1	1	1	1	1
349.28195_32.273_6.91	0.834537	0.781462	0.49702	0.991859	0.989672	0.976587	0.999943	0.900763	0.904896	0.96328	0.886989	0.999876	1	1	1	1	1	1
274.27403_25.745_6.33	0.602721	0.0311082	0.467727	1	0.68781	0.183509	0.662233	0.159807	0.762174	0.953388	0.257814	0.999876	1	1	1	1	1	1
277.05573_30.531_5.38	0.34217	0.701623	0.193167	0.999206	0.891204	0.71579	0.924642	0.620654	0.365581	0.94968	0.840768	0.999876	1	1	1	1	1	1
425.18625_24.751_7.02	0.184352	0.885938	0.472982	0.938892	0.920218	0.801727	0.640251	0.976678	0.484533	0.94968	0.956369	0.999876	1	1	1	1	1	1
318.15076_30.534_5.96	0.909855	0.187333	0.938687	0.999716	0.804192	0.790562	0.739244	0.723795	0.999994	0.96328	0.436499	0.999876	1	1	1	1	1	1
422.29051_33.225_7.47	0.916735	0.0100806	0.976131	1	0.224812	0.210426	0.198431	0.184909	0.999976	0.96328	0.201605	0.999876	1	1	1	1	1	1
245.13627_13.726_4.85	0.744211	0.0577316	0.647333	0.922103	0.328787	0.368147	0.610563	0.661531	0.999818	0.96328	0.301006	0.999876	1	1	1	1	1	1
282.91093_27.009_4.68	0.240802	0.013804	0.924114	0.867306	0.23044	0.651319	0.0580631	0.25301	0.859776	0.94968	0.201605	0.999876	1	1	1	1	1	1
149.02371_14.803_3.54	0.238522	0.0155955	0.944317	0.856877	0.252827	0.678452	0.0626369	0.262999	0.865863	0.94968	0.202174	0.999876	1	1	1	1	1	1
390.17023_29.138_6.41	0.802107	0.151312	0.430309	0.979832	0.391191	0.827276	0.556137	0.951068	0.880599	0.96328	0.40729	0.999876	1	1	1	1	1	1
383.11611_10.471_5.47	0.758586	0.330538	0.821676	0.974006	0.823752	0.792458	0.957482	0.940757	0.999924	0.96328	0.595835	0.999876	1	1	1	1	1	1
467.14237_29.493_8.10	0.589705	0.333349	0.630841	0.894283	0.985979	0.979757	0.744773	0.717715	0.999968	0.950764	0.596431	0.999876	1	1	1	1	1	1
374.17587_32.387_6.60	0.447083	0.0397845	0.14831	0.963301	0.0755349	0.766178	0.138101	0.940766	0.408385	0.94968	0.26084	0.999876	1	1	1	1	1	1
542.01542_30.731_7.31	0.9174	0.18977	0.471888	0.969216	0.470473	0.823359	0.681433	0.962801	0.933878	0.96328	0.439306	0.999876	1	1	1	1	1	1
425.08463_31.013_6.51	0.541299	0.330663	0.660935	0.998767	0.740854	0.993273	0.636587	0.975191	0.888936	0.94968	0.595835	0.999876	1	1	1	1	1	1
148.11238_35.724_3.86	0.341562	0.142906	0.972572	0.889493	0.725449	0.968664	0.329856	0.672537	0.940502	0.94968	0.402773	0.999876	1	1	1	1	1	1
149.02373_16.751_3.55	0.291812	0.141047	0.900808	0.897968	0.654613	0.982483	0.283363	0.733957	0.870659	0.94968	0.402773	0.999876	1	1	1	1	1	1
275.88916_9.777_4.24	0.125866	0.000851697	0.876724	0.475993	0.0405886	0.00463256	0.344744	0.0499753	0.720951	0.94968	0.0406073	0.999876	1	1	0.330302	1	1	1
452.39431_34.158_7.84	0.853467	0.189484	0.940946	0.99887	0.805647	0.818746	0.712414	0.72784	0.999994	0.96328	0.438999	0.999876	1	1	1	1	1	1
463.14848_32.153_7.29	0.704435	8.54341e-05	0.95362	0.998737	0.0113904	0.0126528	0.00651215	0.00726566	0.999951	0.96328	0.00937146	0.999876	1	0.823003	0.691534	0.509206	0.664816	1
449.34872_26.417_7.92	0.792237	0.303855	0.564812	0.998906	0.988836	0.750698	0.966484	0.650711	0.913027	0.96328	0.573025	0.999876	1	1	1	1	1	1
274.17069_14.351_5.29	0.0314874	0.12356	0.46969	0.160793	0.931449	0.980053	0.0689388	0.362462	0.789306	0.847723	0.402114	0.999876	1	1	1	1	1	1
284.13423_3.752_5.37	0.111208	0.552821	0.688815	0.729673	0.999238	0.391586	0.833107	0.887352	0.502397	0.94968	0.751858	0.999876	1	1	1	1	1	1
393.22425_28.994_6.88	0.0413424	0.446054	0.34262	0.735573	0.607175	0.729311	0.151351	0.999421	0.176154	0.847723	0.666045	0.999876	1	1	1	1	1	1
704.78029_3.539_6.24	0.246115	0.969652	0.868663	0.738371	0.999684	0.859979	0.823799	0.998874	0.912011	0.94968	0.987308	0.999876	1	1	1	1	1	1
313.23755_26.174_6.27	0.0290102	0.356321	0.946493	0.29238	0.927083	0.774155	0.127437	0.882283	0.467769	0.847723	0.613452	0.999876	1	1	1	1	1	1
277.21637_24.432_5.87	0.0178813	0.989315	0.989719	0.222427	1	0.306893	0.269219	0.999997	0.349393	0.808999	0.997006	0.999876	1	1	1	1	1	1
293.20898_28.985_6.09	0.0488082	0.458278	0.304056	0.800505	0.579938	0.750325	0.168619	0.997483	0.173872	0.847723	0.675457	0.999876	1	1	1	1	1	1
604.44179_32.377_8.71	0.541445	0.982919	0.0241101	0.660937	0.301485	0.926336	0.849872	0.346401	0.139689	0.94968	0.994779	0.999876	1	1	1	1	1	1
347.11343_7.136_6.49	0.910734	0.183645	0.84684	0.993434	0.690202	0.711186	0.80199	0.82099	0.999985	0.96328	0.431073	0.999876	1	1	1	1	1	1
347.11264_7.484_6.49	0.618793	0.305383	0.576676	0.85654	0.667441	0.711769	0.968966	0.982183	0.999858	0.959394	0.57375	0.999876	1	1	1	1	1	1
471.93116_26.451_6.13	0.40913	0.14741	0.100265	0.295761	0.137144	0.435628	0.899197	0.999449	0.881937	0.94968	0.402773	0.999876	1	1	1	1	1	1
355.15766_14.301_5.96	0.159251	0.921606	0.709252	0.537042	0.99684	0.799036	0.711932	0.986454	0.906437	0.94968	0.973489	0.999876	1	1	1	1	1	1
327.10492_13.075_5.46	0.278744	0.610639	0.99411	0.834743	0.984043	0.978715	0.661582	0.980623	0.891832	0.94968	0.797328	0.999876	1	1	1	1	1	1
273.13350_20.453_5.28	0.0787919	0.344846	0.77916	0.416512	0.964402	0.941591	0.240584	0.8046	0.762588	0.899616	0.605832	0.999876	1	1	1	1	1	1
243.08658_9.340_4.78	0.215032	0.158242	0.874424	0.840828	0.668315	0.997979	0.243625	0.774277	0.794746	0.94968	0.407888	0.999876	1	1	1	1	1	1
636.14889_35.970_8.00	0.519818	0.826191	0.746543	0.99215	0.978776	0.988632	0.907245	0.999886	0.906103	0.94968	0.916846	0.999876	1	1	1	1	1	1
344.05561_13.469_5.40	0.194189	0.15816	0.892929	0.809306	0.678276	0.999105	0.228098	0.765212	0.78224	0.94968	0.407888	0.999876	1	1	1	1	1	1
287.14908_17.204_5.48	0.27347	0.0302376	0.450493	0.99227	0.163274	0.808909	0.0896666	0.643796	0.602182	0.94968	0.257814	0.999876	1	1	1	1	1	1
607.22049_9.533_7.99	0.715034	0.853011	0.933223	0.985427	0.997373	0.979938	0.999299	0.99983	0.997741	0.96328	0.93749	0.999876	1	1	1	1	1	1
150.02714_31.113_3.54	0.450067	0.176	0.692912	0.99217	0.591718	0.96556	0.415365	0.877691	0.867455	0.94968	0.421455	0.999876	1	1	1	1	1	1
227.17595_4.086_6.36	0.257984	0.304796	0.24386	0.349226	0.402271	0.474067	0.999907	0.999838	0.999247	0.94968	0.573025	0.999876	1	1	1	1	1	1
546.40005_31.248_8.27	0.94488	0.449388	0.393451	0.959756	0.999683	0.902698	0.983013	0.654529	0.881189	0.967441	0.668505	0.999876	1	1	1	1	1	1
405.13517_31.168_7.39	0.734811	0.748911	0.0507112	0.391285	0.574202	0.99818	0.997988	0.353958	0.519119	0.96328	0.867078	0.999876	1	1	1	1	1	1
372.25446_19.447_6.73	0.0409909	0.000488019	0.161762	0.80988	0.227705	0.00107256	0.604162	0.0037522	0.0700933	0.847723	0.0284047	0.999876	1	1	0.166146	1	0.498588	1
219.17464_19.727_5.12	0.0459499	0.000647685	0.144969	0.854538	0.283463	0.00139814	0.641972	0.00418812	0.0691921	0.847723	0.0330471	0.999876	1	1	0.166146	1	0.498588	1
219.17464_15.739_5.12	0.0421843	0.000658225	0.142984	0.84144	0.28825	0.00133095	0.664746	0.00418884	0.064864	0.847723	0.0330471	0.999876	1	1	0.166146	1	0.498588	1
436.29539_25.349_7.19	0.0403735	0.000543447	0.14614	0.827527	0.257784	0.00113304	0.634494	0.00372549	0.0639386	0.847723	0.0308317	0.999876	1	1	0.166146	1	0.498588	1
219.17471_23.880_5.11	0.100021	0.000123555	0.239299	0.892324	0.0736527	0.000795641	0.19343	0.00195573	0.162672	0.94968	0.0106782	0.999876	1	1	0.162083	1	0.371849	1
306.24288_28.533_6.33	0.0452106	0.000386113	0.165798	0.822432	0.196913	0.000977001	0.533764	0.00324389	0.0755808	0.847723	0.0256092	0.999876	1	1	0.166146	1	0.498588	1
219.17462_25.220_5.11	0.14126	0.0050396	0.389911	0.889775	0.38847	0.0148723	0.734007	0.0416494	0.321338	0.94968	0.126641	0.999876	1	1	0.744648	1	1	1
219.17463_24.227_5.11	0.129491	0.00495383	0.395333	0.8708	0.381777	0.0137406	0.750377	0.0417392	0.309858	0.94968	0.126641	0.999876	1	1	0.72571	1	1	1
219.17461_19.327_5.12	0.128421	0.00532121	0.387237	0.874026	0.399772	0.0143102	0.766629	0.0428955	0.303773	0.94968	0.12971	0.999876	1	1	0.74205	1	1	1
248.03877_12.574_4.94	0.136438	0.0116924	0.350397	0.908566	0.579661	0.025586	0.886737	0.0656072	0.294608	0.94968	0.201605	0.999876	1	1	1	1	1	1
357.21421_11.523_5.40	0.232762	0.378277	0.349727	0.439569	0.999892	0.999401	0.531948	0.562949	0.999958	0.94968	0.625724	0.999876	1	1	1	1	1	1
353.22964_26.156_6.37	0.0777022	0.0605793	0.00792324	0.922992	0.0121957	0.999855	0.0289225	0.910269	0.0153243	0.899616	0.304177	0.999876	1	0.827676	1	0.762295	1	1
295.20206_33.543_5.71	0.400533	0.453043	0.55069	0.736492	0.999686	0.999999	0.717014	0.763578	0.999835	0.94968	0.670849	0.999876	1	1	1	1	1	1
315.12049_20.100_5.96	0.564149	0.320191	0.589619	0.999941	0.689088	0.990558	0.6337	0.983585	0.865902	0.94968	0.585	0.999876	1	1	1	1	1	1
352.16040_15.025_5.86	0.274938	0.448329	0.415619	0.531158	0.999904	0.998856	0.620366	0.67067	0.999824	0.94968	0.667681	0.999876	1	1	1	1	1	1
548.29137_10.250_7.51	0.170634	0.382168	0.365091	0.967859	0.578418	0.976146	0.32302	1	0.398437	0.94968	0.627402	0.999876	1	1	1	1	1	1
270.08591_4.483_3.82	0.332146	0.346361	0.983915	0.890026	0.899739	0.999998	0.526609	0.900699	0.917941	0.94968	0.606397	0.999876	1	1	1	1	1	1
245.88065_29.431_4.39	0.470098	0.455123	0.71712	0.990606	0.854384	0.999998	0.691063	0.990557	0.879621	0.94968	0.672286	0.999876	1	1	1	1	1	1
565.37116_25.664_7.93	0.566681	0.30989	0.589877	0.999952	0.679981	0.988654	0.62601	0.981275	0.867416	0.94968	0.577142	0.999876	1	1	1	1	1	1
299.19925_29.529_6.04	0.216995	0.391268	0.747517	0.855712	0.981215	0.435302	0.984066	0.823298	0.687771	0.94968	0.629384	0.999876	1	1	1	1	1	1
394.09167_30.699_6.42	0.907404	0.926519	0.169872	0.829227	0.69257	0.999205	0.984862	0.788305	0.654278	0.96328	0.976799	0.999876	1	1	1	1	1	1
380.08742_30.699_6.41	0.0700151	0.140637	0.117645	0.0821121	0.148366	0.135173	0.999751	0.99999	0.999947	0.899616	0.402773	0.999876	1	1	1	1	1	1
237.13885_30.182_5.20	0.650374	0.399272	0.40653	0.99801	0.999999	0.744241	0.998747	0.625858	0.765671	0.96328	0.63307	0.999876	1	1	1	1	1	1
373.08964_15.808_5.82	0.248091	0.47047	0.337584	0.444708	0.997021	0.996694	0.619607	0.624033	1	0.94968	0.684931	0.999876	1	1	1	1	1	1
480.05635_16.499_6.52	0.30846	0.623932	0.429862	0.57057	0.995076	0.990732	0.761296	0.792998	0.99994	0.94968	0.80264	0.999876	1	1	1	1	1	1
243.12060_34.775_4.86	0.962755	0.88723	0.220803	0.81911	0.740234	0.999984	0.994754	0.861449	0.786659	0.976797	0.957027	0.999876	1	1	1	1	1	1
309.24250_29.487_6.24	0.425271	0.802201	0.695712	0.818822	0.999494	0.985352	0.894055	0.966563	0.995954	0.94968	0.899323	0.999876	1	1	1	1	1	1
159.06559_9.049_5.12	0.232487	0.400619	0.504022	0.541574	0.999547	0.998142	0.52616	0.696053	0.993338	0.94968	0.63307	0.999876	1	1	1	1	1	1
275.11276_15.801_5.87	0.241513	0.490415	0.387601	0.472839	0.998716	0.99414	0.617516	0.679524	0.99967	0.94968	0.698158	0.999876	1	1	1	1	1	1
347.04256_9.050_5.38	0.170427	0.41456	0.568056	0.493275	0.99844	0.986893	0.449688	0.746484	0.965002	0.94968	0.643617	0.999876	1	1	1	1	1	1
431.15250_14.440_6.48	0.282714	0.997528	0.498417	0.578813	0.958348	0.893402	0.895839	0.96163	0.997171	0.94968	0.998706	0.999876	1	1	1	1	1	1
452.06153_16.491_6.37	0.268404	0.478565	0.340796	0.468761	0.996814	0.997756	0.646748	0.632669	0.999996	0.94968	0.690373	0.999876	1	1	1	1	1	1
282.91088_28.837_4.67	0.304344	0.0680223	0.24772	0.379052	0.159877	0.211895	0.869379	0.935645	0.998329	0.94968	0.307824	0.999876	1	1	1	1	1	1
439.13711_31.217_7.80	0.22389	0.943463	0.69016	0.89519	0.994743	0.776898	0.799998	0.986668	0.67439	0.94968	0.978371	0.999876	1	1	1	1	1	1
638.15070_9.543_7.91	0.333005	0.441285	0.587319	0.699094	0.998771	0.999882	0.648123	0.77647	0.996786	0.94968	0.662565	0.999876	1	1	1	1	1	1
322.18631_25.293_6.02	0.524649	0.489398	0.725582	0.894431	0.99531	0.999671	0.803972	0.871587	0.999162	0.94968	0.697185	0.999876	1	1	1	1	1	1
572.43663_29.782_8.27	0.643424	0.101428	0.27846	0.971934	0.224202	0.829823	0.360665	0.962869	0.689052	0.96328	0.36114	0.999876	1	1	1	1	1	1
254.94957_18.897_4.47	0.816511	0.393985	0.93029	0.993052	0.9058	0.857768	0.968898	0.939285	0.99948	0.96328	0.630553	0.999876	1	1	1	1	1	1
528.41052_29.808_7.90	0.235186	0.0850399	0.479839	0.95041	0.872552	0.157169	0.991256	0.297764	0.513717	0.94968	0.327228	0.999876	1	1	1	1	1	1
347.21937_25.761_6.45	0.162968	0.440302	0.874284	0.76185	0.908353	0.969825	0.401409	0.966682	0.72227	0.94968	0.662565	0.999876	1	1	1	1	1	1
283.17555_32.809_5.25	0.992796	0.753471	0.290503	0.883327	0.745439	0.998736	0.982643	0.950633	0.845577	0.995939	0.868593	0.999876	1	1	1	1	1	1
219.17465_21.534_5.11	0.277513	0.0202035	0.672739	0.909121	0.466926	0.0717557	0.791253	0.17646	0.674292	0.94968	0.251617	0.999876	1	1	1	1	1	1
357.11577_15.024_5.74	0.262979	0.450045	0.418684	0.520064	0.999913	0.998225	0.608494	0.674223	0.999609	0.94968	0.668505	0.999876	1	1	1	1	1	1
341.14206_15.807_5.74	0.300723	0.510147	0.360994	0.516462	0.996523	0.998169	0.696758	0.671869	0.999978	0.94968	0.713206	0.999876	1	1	1	1	1	1
373.08962_16.501_5.85	0.292079	0.416905	0.372244	0.519255	0.999778	0.999873	0.621577	0.612804	0.999999	0.94968	0.645351	0.999876	1	1	1	1	1	1
152.01685_12.461_3.72	0.868439	0.0298078	0.289916	0.792939	0.108883	0.326674	0.364974	0.768722	0.912645	0.96328	0.257814	0.999876	1	1	1	1	1	1
219.17464_22.491_5.12	0.342768	0.0019197	0.403203	0.989045	0.237755	0.0165259	0.325977	0.0224453	0.518459	0.94968	0.0720392	0.999876	1	1	0.785529	1	1	1
344.22799_18.191_5.93	0.778684	0.249495	0.814375	0.975317	0.750131	0.726813	0.91238	0.896415	0.999977	0.96328	0.518252	0.999876	1	1	1	1	1	1
554.12940_4.485_7.26	0.336719	0.360734	0.907891	0.85452	0.939807	0.999999	0.553679	0.870606	0.950959	0.94968	0.617951	0.999876	1	1	1	1	1	1
275.11273_9.376_5.09	0.23589	0.380122	0.557306	0.578881	0.997274	0.998912	0.507709	0.713491	0.988203	0.94968	0.626824	0.999876	1	1	1	1	1	1
275.11277_8.498_5.06	0.212069	0.421369	0.514798	0.521305	0.999703	0.994881	0.515687	0.718942	0.988623	0.94968	0.647992	0.999876	1	1	1	1	1	1
377.14191_6.170_5.79	0.159776	0.350613	0.326118	0.972546	0.518565	0.978059	0.286769	1	0.355663	0.94968	0.608047	0.999876	1	1	1	1	1	1
315.12072_20.382_5.82	0.841155	0.52588	0.288494	0.830687	0.985616	0.974406	0.970596	0.617762	0.886672	0.96328	0.726301	0.999876	1	1	1	1	1	1
275.11275_9.237_5.09	0.25009	0.394303	0.561437	0.598032	0.997828	0.999043	0.533854	0.727213	0.99016	0.94968	0.630707	0.999876	1	1	1	1	1	1
195.11483_32.252_4.87	0.618203	0.0229828	0.699735	0.884226	0.217657	0.182077	0.497643	0.433195	0.999552	0.959394	0.257814	0.999876	1	1	1	1	1	1
284.91110_34.069_4.62	0.998725	0.171783	0.973861	0.99986	0.741114	0.730621	0.756349	0.745617	0.999998	0.999598	0.416603	0.999876	1	1	1	1	1	1
167.91757_18.459_4.04	0.476626	0.492234	0.650109	0.838989	0.998623	0.999961	0.784117	0.84029	0.9996	0.94968	0.698781	0.999876	1	1	1	1	1	1
245.10210_7.613_4.88	0.421243	0.0825592	0.695767	0.989779	0.419897	0.875707	0.259413	0.715626	0.859762	0.94968	0.320705	0.999876	1	1	1	1	1	1
273.13343_13.469_5.29	0.207958	0.0411682	0.627459	0.93048	0.266936	0.904366	0.0930982	0.597025	0.656205	0.94968	0.265514	0.999876	1	1	1	1	1	1
275.11279_16.492_6.01	0.240585	0.410706	0.363514	0.457331	0.999739	0.998764	0.56353	0.600758	0.999929	0.94968	0.640423	0.999876	1	1	1	1	1	1
341.14205_16.503_5.72	0.273074	0.4921	0.39919	0.516153	0.999039	0.997047	0.651304	0.689627	0.99992	0.94968	0.698781	0.999876	1	1	1	1	1	1
219.17466_20.487_5.12	0.58515	0.00571312	0.842412	0.977265	0.20166	0.0662381	0.314588	0.107666	0.927213	0.950761	0.135782	0.999876	1	1	1	1	1	1
445.44311_30.687_5.38	0.460715	0.317204	0.477239	0.704204	0.610782	0.630494	0.992455	0.994916	0.999988	0.94968	0.583278	0.999876	1	1	1	1	1	1
275.11276_15.805_5.05	0.236363	0.462912	0.404845	0.479644	0.999675	0.995483	0.589927	0.673233	0.999207	0.94968	0.678552	0.999876	1	1	1	1	1	1
442.70913_30.704_5.69	0.599295	0.922808	0.411335	0.998844	0.904085	0.982875	0.94032	0.954222	0.758433	0.953232	0.974398	0.999876	1	1	1	1	1	1
243.10205_22.055_5.13	0.207615	0.585218	0.799024	0.847998	0.938473	0.95326	0.543031	0.995956	0.731429	0.94968	0.780291	0.999876	1	1	1	1	1	1
352.16042_15.805_5.87	0.251333	0.480221	0.400907	0.493665	0.999337	0.995874	0.619579	0.682623	0.999652	0.94968	0.691864	0.999876	1	1	1	1	1	1
219.17465_25.396_5.11	0.971187	0.252622	0.806051	0.997998	0.748924	0.84578	0.815098	0.901559	0.997873	0.982208	0.521708	0.999876	1	1	1	1	1	1
259.11777_10.320_5.09	0.361824	0.0537676	0.710192	0.978193	0.346112	0.834156	0.178554	0.609136	0.835808	0.94968	0.299958	0.999876	1	1	1	1	1	1
219.17472_24.628_5.11	0.194939	0.00290321	0.304499	0.966782	0.359551	0.0128511	0.558012	0.0226509	0.314444	0.94968	0.10412	0.999876	1	1	0.691534	1	1	1
333.11579_4.963_5.47	0.188987	0.338687	0.327068	0.984519	0.509489	0.989453	0.311101	1	0.389987	0.94968	0.600333	0.999876	1	1	1	1	1	1
410.10508_30.695_6.64	0.567447	0.00998872	0.515026	0.863734	0.427382	0.316975	0.129912	0.0862256	0.996446	0.94968	0.201605	0.999876	1	1	1	1	1	1
484.38439_29.831_7.59	0.154678	0.0782538	0.745035	0.508363	0.434873	0.126466	0.991981	0.676181	0.863389	0.94968	0.311269	0.999876	1	1	1	1	1	1
289.21640_25.762_5.76	0.130689	0.515083	0.196764	0.989063	0.497817	0.887411	0.318229	0.967366	0.215529	0.94968	0.716943	0.999876	1	1	1	1	1	1
233.10220_9.235_4.65	0.204383	0.393301	0.544814	0.529957	0.998389	0.995928	0.481907	0.716276	0.982611	0.94968	0.630553	0.999876	1	1	1	1	1	1
233.10223_9.066_4.72	0.241632	0.398532	0.485564	0.54126	0.99975	0.99878	0.537466	0.682123	0.995879	0.94968	0.63307	0.999876	1	1	1	1	1	1
219.17471_20.998_5.12	0.908367	0.0267339	0.87706	0.999654	0.304213	0.364588	0.31305	0.377043	0.99929	0.96328	0.257814	0.999876	1	1	1	1	1	1
672.52465_32.090_9.13	0.372495	0.030712	0.312185	0.999901	0.118296	0.74405	0.111439	0.755361	0.563832	0.94968	0.257814	0.999876	1	1	1	1	1	1
340.25170_21.535_6.51	0.341888	0.000408391	0.596025	0.946006	0.0648542	0.00583006	0.133514	0.0117611	0.647227	0.94968	0.0258829	0.999876	1	1	0.395889	1	0.767631	1
504.26516_9.363_7.17	0.156543	0.779447	0.747589	0.800479	0.971684	0.834025	0.574759	0.999996	0.6303	0.94968	0.88565	0.999876	1	1	1	1	1	1
233.10220_9.381_4.65	0.209336	0.393864	0.573544	0.553468	0.997293	0.996249	0.484964	0.734111	0.979169	0.94968	0.630553	0.999876	1	1	1	1	1	1
275.11279_16.495_5.22	0.233179	0.465855	0.413293	0.481512	0.999748	0.99482	0.586968	0.681724	0.998833	0.94968	0.679948	0.999876	1	1	1	1	1	1
315.10532_8.498_5.35	0.234037	0.367543	0.521561	0.555567	0.998131	0.999288	0.500296	0.68061	0.99201	0.94968	0.620601	0.999876	1	1	1	1	1	1
357.11582_15.808_5.76	0.254515	0.477759	0.390866	0.490306	0.999143	0.996407	0.622979	0.673147	0.999825	0.94968	0.689909	0.999876	1	1	1	1	1	1
357.11586_16.505_5.78	0.262242	0.480953	0.406217	0.509581	0.999435	0.996765	0.631198	0.687162	0.999755	0.94968	0.692417	0.999876	1	1	1	1	1	1
358.27009_5.334_6.37	0.970122	0.443975	0.931449	0.999923	0.961897	0.945033	0.943367	0.921704	0.999898	0.981479	0.664332	0.999876	1	1	1	1	1	1
219.17470_20.195_5.12	0.264615	0.000882767	0.688925	0.873133	0.0883553	0.00810232	0.244063	0.0241915	0.645667	0.94968	0.0406073	0.999876	1	1	0.525178	1	1	1
267.17224_29.371_5.60	0.103234	0.37581	0.0939151	0.997674	0.911858	0.234026	0.827685	0.270095	0.0983453	0.94968	0.624266	0.999876	1	1	1	1	1	1
315.15687_31.661_6.37	0.0608502	0.187098	0.487152	0.682304	0.969555	0.110518	0.93368	0.467195	0.269821	0.855409	0.436499	0.999876	1	1	1	1	1	1
289.15392_29.370_6.34	0.108562	0.315759	0.11406	0.995002	0.960255	0.212439	0.882489	0.264695	0.117014	0.94968	0.581947	0.999876	1	1	1	1	1	1
251.16434_27.565_5.61	0.253116	0.0268837	0.365084	0.996553	0.125346	0.811293	0.0748084	0.683324	0.512528	0.94968	0.257814	0.999876	1	1	1	1	1	1
275.11283_9.052_5.16	0.226033	0.417248	0.504106	0.532937	0.999768	0.996777	0.530947	0.708955	0.992337	0.94968	0.645351	0.999876	1	1	1	1	1	1
295.22686_26.149_6.09	0.00461137	0.025682	0.0486996	0.727434	0.0241547	0.911709	0.00275403	0.990533	0.00991353	0.549935	0.257814	0.999876	1	1	1	0.3415	1	1
307.22694_25.761_6.05	0.136288	0.601064	0.164943	0.995711	0.505441	0.849554	0.36211	0.921647	0.192647	0.94968	0.790161	0.999876	1	1	1	1	1	1
315.15687_31.505_6.35	0.0546613	0.267822	0.51811	0.641945	0.988093	0.138895	0.86103	0.583827	0.272986	0.847723	0.540189	0.999876	1	1	1	1	1	1
328.16038_4.963_5.78	0.141492	0.693222	0.752541	0.776185	0.95537	0.854477	0.503226	0.999886	0.61201	0.94968	0.838274	0.999876	1	1	1	1	1	1
329.17245_32.506_6.51	0.045633	0.236026	0.721208	0.484314	0.932361	0.116525	0.874446	0.670601	0.343982	0.847723	0.503098	0.999876	1	1	1	1	1	1
372.18648_6.170_6.15	0.12009	0.68531	0.682464	0.770738	0.934437	0.823496	0.453107	1	0.532335	0.94968	0.837765	0.999876	1	1	1	1	1	1
416.21266_7.322_6.45	0.135879	0.709379	0.676067	0.802084	0.939365	0.835412	0.493971	0.999996	0.555229	0.94968	0.846152	0.999876	1	1	1	1	1	1
457.11563_30.683_4.72	0.438522	0.406307	0.558077	0.739069	0.738291	0.685659	0.999567	0.997026	0.999752	0.94968	0.637748	0.999876	1	1	1	1	1	1
460.24004_8.388_6.81	0.171697	0.761417	0.728498	0.830576	0.96468	0.858953	0.586483	0.999996	0.640703	0.94968	0.875036	0.999876	1	1	1	1	1	1
485.35858_3.885_7.43	0.567083	0.388779	0.727336	0.915706	0.983483	0.992793	0.763544	0.812151	0.999773	0.94968	0.628926	0.999876	1	1	1	1	1	1
592.35403_12.904_7.91	0.59145	0.812978	0.88811	0.957581	0.999902	0.997464	0.948778	0.992606	0.994884	0.952465	0.906771	0.999876	1	1	1	1	1	1
636.38013_13.586_8.28	0.464682	0.63094	0.980922	0.948669	0.983729	0.998454	0.817551	0.986348	0.959752	0.94968	0.806314	0.999876	1	1	1	1	1	1
346.96166_20.541_5.29	0.164991	0.231216	0.24847	0.291404	1	1	0.342496	0.342496	1	0.94968	0.496879	0.999876	1	1	1	1	1	1
321.89455_8.613_4.74	0.471483	0.370115	0.0595742	0.854843	0.194786	1	0.492704	0.876365	0.230981	0.94968	0.621653	0.999876	1	1	1	1	1	1
424.08143_22.072_6.28	0.50802	0.126387	0.530299	0.758511	0.415694	0.415694	0.887278	0.887278	1	0.94968	0.402114	0.999876	1	1	1	1	1	1
285.22160_28.485_5.80	0.303534	0.619565	0.178372	0.999701	0.908246	0.63026	0.928867	0.550719	0.320447	0.94968	0.80096	0.999876	1	1	1	1	1	1
335.08294_32.194_5.97	0.165058	0.231291	0.248547	0.291536	1	1	0.342634	0.342634	1	0.94968	0.496879	0.999876	1	1	1	1	1	1
379.30508_29.850_6.83	0.239862	0.464773	0.962735	0.792928	0.961056	0.526768	0.983238	0.938483	0.828279	0.94968	0.679211	0.999876	1	1	1	1	1	1
258.07732_15.495_5.05	0.165323	0.231589	0.24885	0.29206	1	1	0.34318	0.34318	1	0.94968	0.496879	0.999876	1	1	1	1	1	1
267.15906_11.328_5.23	0.100083	0.790249	0.797974	0.467188	1	0.76082	0.519553	0.981223	0.787909	0.94968	0.892237	0.999876	1	1	1	1	1	1
257.10213_12.313_4.97	0.942244	0.477325	0.256951	0.831163	0.544707	0.961496	0.926406	0.990973	0.841344	0.966473	0.689909	0.999876	1	1	1	1	1	1
328.22561_28.043_6.33	0.640116	0.147295	0.731648	0.948561	0.849789	0.849789	0.551259	0.551259	1	0.96328	0.402773	0.999876	1	1	1	1	1	1
289.21637_26.229_5.84	0.0806652	0.0637562	0.0550742	1	0.0495705	1	0.0400214	1	0.0653068	0.899616	0.306288	0.999876	1	1	1	0.864096	1	1
677.48091_32.112_9.03	0.165009	0.231237	0.248491	0.29144	1	1	0.342533	0.342533	1	0.94968	0.496879	0.999876	1	1	1	1	1	1
207.15124_23.301_4.93	0.164978	0.231202	0.248456	0.29138	1	1	0.34247	0.34247	1	0.94968	0.496879	0.999876	1	1	1	1	1	1
159.96810_1.857_3.82	0.492889	0.125083	0.516867	0.740257	0.405428	0.405428	0.891453	0.891453	1	0.94968	0.402114	0.999876	1	1	1	1	1	1
287.20079_28.011_5.81	0.0820783	0.308665	0.326663	0.857643	1	0.191236	0.878804	0.482675	0.227131	0.899616	0.575633	0.999876	1	1	1	1	1	1
237.93983_12.475_4.30	0.949033	0.175756	0.31049	0.90235	0.33783	0.80472	0.653722	0.990588	0.854266	0.96864	0.421455	0.999876	1	1	1	1	1	1
249.19799_25.070_5.49	0.165459	0.231741	0.249005	0.292327	1	1	0.343459	0.343459	1	0.94968	0.496879	0.999876	1	1	1	1	1	1
180.10241_27.191_4.35	0.647082	0.14744	0.737926	0.951948	0.847146	0.847146	0.554977	0.554977	1	0.96328	0.402773	0.999876	1	1	1	1	1	1
345.21496_35.151_6.93	0.164937	0.231156	0.248409	0.291299	1	1	0.342386	0.342386	1	0.94968	0.496879	0.999876	1	1	1	1	1	1
619.47985_32.157_9.61	0.168503	0.235151	0.252472	0.298328	1	1	0.349714	0.349714	1	0.94968	0.502359	0.999876	1	1	1	1	1	1
301.21615_29.348_5.79	0.640384	0.319454	0.436385	0.9993	0.999023	0.673729	0.993665	0.578908	0.780326	0.96328	0.584323	0.999876	1	1	1	1	1	1
300.20186_11.254_5.57	0.249711	0.156798	0.884274	0.870394	0.671441	0.994446	0.269514	0.767366	0.831344	0.94968	0.407888	0.999876	1	1	1	1	1	1
278.21206_29.627_5.99	0.362842	0.0741495	0.477224	0.68282	0.850783	0.850783	0.273784	0.273784	1	0.94968	0.307824	0.999876	1	1	1	1	1	1
336.18082_22.694_6.09	0.269783	0.415408	0.98596	0.811868	0.940105	0.522403	0.994834	0.925398	0.861119	0.94968	0.644233	0.999876	1	1	1	1	1	1
301.16614_26.515_5.79	0.164998	0.231225	0.248479	0.291419	1	1	0.342512	0.342512	1	0.94968	0.496879	0.999876	1	1	1	1	1	1
593.30864_31.660_8.86	0.0795717	0.277338	0.295174	0.87101	1	0.170479	0.890419	0.426678	0.20446	0.899616	0.548342	0.999876	1	1	1	1	1	1
374.30433_33.554_6.80	0.895246	0.710755	0.0381585	0.524205	0.269218	1	0.906476	0.574621	0.310231	0.96328	0.846607	0.999876	1	1	1	1	1	1
195.46833_32.171_4.86	0.571239	0.145956	0.668888	0.906523	0.875677	0.875677	0.513955	0.513955	1	0.949956	0.402773	0.999876	1	1	1	1	1	1
708.41737_32.171_9.91	0.535912	0.14648	0.636033	0.878338	0.890084	0.890084	0.496244	0.496244	1	0.94968	0.402773	0.999876	1	1	1	1	1	1
346.27413_21.724_6.37	0.664732	0.14717	0.753855	0.959905	0.839545	0.839545	0.563287	0.563287	1	0.96328	0.402773	0.999876	1	1	1	1	1	1
210.59518_25.759_4.51	0.0807859	0.0638605	0.0551691	1	0.0496892	1	0.0401221	1	0.0654523	0.899616	0.306288	0.999876	1	1	1	0.864096	1	1
275.07083_14.906_5.16	0.609429	0.145575	0.703971	0.931889	0.859941	0.859941	0.532946	0.532946	1	0.954471	0.402773	0.999876	1	1	1	1	1	1
263.13892_4.738_5.37	0.0095485	0.11114	0.0989038	0.723062	0.111454	0.779551	0.0145346	1	0.0264337	0.549935	0.383741	0.999876	1	1	1	0.567844	1	1
333.20624_22.497_6.25	0.269539	0.117486	0.893733	0.74336	0.60674	0.239602	0.98516	0.693417	0.899181	0.94968	0.397425	0.999876	1	1	1	1	1	1
307.38988_25.758_6.04	0.0536464	0.384864	0.366981	0.777097	0.582172	0.824731	0.158361	1	0.21702	0.847723	0.627853	0.999876	1	1	1	1	1	1
230.13932_1.620_4.85	0.165401	0.231676	0.248938	0.292213	1	1	0.34334	0.34334	1	0.94968	0.496879	0.999876	1	1	1	1	1	1
257.13596_13.640_5.04	0.441715	0.0343116	0.436392	1	0.170749	0.706111	0.148005	0.681495	0.722076	0.94968	0.257814	0.999876	1	1	1	1	1	1
788.60916_33.485_9.94	0.584124	0.146437	0.680701	0.915604	0.871179	0.871179	0.521412	0.521412	1	0.950761	0.402773	0.999876	1	1	1	1	1	1
321.89463_11.650_4.74	0.980173	0.204259	0.297355	0.884213	0.358468	0.826247	0.705559	0.996683	0.854403	0.988142	0.463788	0.999876	1	1	1	1	1	1
[truncated: 853 more rows]

## Sheet: H
Peak	I.p	B.p	Interaction.p	I/D	DB/D	IB/I	IB/D	DB/I	DB/IB	I.fdr	B.fdr	Interaction.fdr	I/D.fdr	DB/D.fdr	IB/D.fdr	DB/I.fdr	IB/I.fdr	DB/IB.fdr
563.20000_24.281_7.78	0.077697	0.497132	0.497132	0.300608	1	0.841513	0.300608	0.763285	0.841513	0.424266	0.910803	0.973343	1	1	1	1	1	1
434.77971_7.291_6.43	0.921796	0.280533	0.281683	0.828697	1	0.890376	0.827754	0.419013	0.891141	0.999651	0.877642	0.973343	1	1	1	1	1	1
357.71581_11.509_5.41	0.508105	0.0770025	0.508105	0.776966	0.833929	0.833929	0.30476	0.30476	1	0.815683	0.754725	0.973343	1	1	1	1	1	1
115.96446_26.436_3.33	0.647443	0.638357	0.148803	0.519604	0.5142	0.908689	1	0.886198	0.88246	0.878104	0.916803	0.972671	1	1	1	1	1	1
665.06990_24.320_8.90	0.130465	0.130465	0.130465	0.149164	1	1	0.149164	0.149164	1	0.490066	0.754725	0.951086	1	1	1	1	1	1
406.09198_24.985_5.95	0.298785	0.283733	0.952175	0.854835	0.843455	0.437362	0.999994	0.881453	0.891407	0.681974	0.877642	0.999886	1	1	1	1	1	1
596.86103_24.135_8.06	0.0370786	0.975071	0.975071	0.424184	1	0.400033	0.424184	0.999967	0.400033	0.399953	0.999328	0.999886	1	1	1	1	1	1
515.17467_30.698_7.90	0.652297	0.196868	0.196441	0.923981	1	0.593146	0.924288	0.264088	0.592579	0.878104	0.826204	0.973343	1	1	1	1	1	1
442.28907_8.878_6.61	0.342684	0.358237	0.419681	0.999575	0.605154	0.999996	0.54215	0.999793	0.591666	0.713939	0.905064	0.973343	1	1	1	1	1	1
278.18552_7.999_4.76	0.314513	0.0654238	0.909565	0.848581	0.575297	0.914724	0.184663	0.478989	0.914938	0.690331	0.754725	0.999886	1	1	1	1	1	1
560.20070_24.273_7.77	0.129572	0.129572	0.129572	0.147709	1	1	0.147709	0.147709	1	0.490066	0.754725	0.951086	1	1	1	1	1	1
645.07030_24.258_8.63	0.0777946	0.549778	0.549778	0.812912	1	0.328016	0.812912	0.824895	0.328016	0.424266	0.911667	0.973343	1	1	1	1	1	1
514.18151_30.694_7.90	0.64918	0.194083	0.201117	0.928287	0.999999	0.58754	0.923291	0.265757	0.596859	0.878104	0.823291	0.973343	1	1	1	1	1	1
486.31730_11.852_7.58	0.075936	0.359628	0.970301	0.575374	0.899833	0.910572	0.226072	0.919023	0.543359	0.424266	0.905064	0.999886	1	1	1	1	1	1
215.10605_20.381_4.76	0.00921807	0.00849276	0.095607	0.0182741	0.841033	0.999993	0.00286934	0.0172686	0.853112	0.316944	0.35733	0.951086	1	1	1	0.697089	1	1
665.90338_24.321_8.91	0.0767202	0.498344	0.498344	0.299124	1	0.838619	0.299124	0.764818	0.838619	0.424266	0.910803	0.973343	1	1	1	1	1	1
460.25549_10.630_7.00	0.153414	0.0250519	0.624627	0.513374	0.536742	0.909549	0.0539048	0.198867	0.896677	0.520868	0.58208	0.973343	1	1	1	1	1	1
364.22488_12.765_5.61	0.983328	0.991475	0.371334	0.920587	0.91279	1	0.999996	0.918109	0.910186	0.999651	0.999328	0.973343	1	1	1	1	1	1
330.22547_32.387_6.78	0.265984	0.25768	0.848119	0.906425	0.900962	0.383642	0.999999	0.772604	0.780533	0.644334	0.863367	0.999886	1	1	1	1	1	1
653.40005_24.280_8.57	0.129613	0.129613	0.129613	0.147775	1	1	0.147775	0.147775	1	0.490066	0.754725	0.951086	1	1	1	1	1	1
122.08483_21.536_6.41	0.643905	0.628454	0.154523	0.890182	0.517429	0.999999	0.903695	0.896318	0.526687	0.878104	0.916803	0.973343	1	1	1	1	1	1
290.20958_14.257_5.60	0.622534	0.624792	0.165707	0.909423	0.532425	1	0.893996	0.90859	0.531053	0.877263	0.916803	0.973343	1	1	1	1	1	1
452.29027_25.247_7.21	0.669637	0.640507	0.140131	0.86252	0.501092	0.999991	0.917264	0.875146	0.518207	0.87872	0.916803	0.965026	1	1	1	1	1	1
219.60061_20.196_5.12	0.623806	0.639952	0.158477	0.902108	0.530528	0.999998	0.900418	0.895853	0.520806	0.877263	0.916803	0.973343	1	1	1	1	1	1
682.91614_24.354_9.05	0.129934	0.129934	0.129934	0.148299	1	1	0.148299	0.148299	1	0.490066	0.754725	0.951086	1	1	1	1	1	1
577.34563_24.324_7.97	0.130965	0.130965	0.130965	0.14998	1	1	0.14998	0.14998	1	0.490066	0.754725	0.951086	1	1	1	1	1	1
599.37139_24.380_8.21	0.131979	0.131979	0.131979	0.15164	1	1	0.15164	0.15164	1	0.490682	0.754725	0.951086	1	1	1	1	1	1
127.08936_3.551_4.34	0.993319	0.298135	0.315185	0.886955	0.465141	0.875856	0.870738	0.999993	0.882062	0.999651	0.88925	0.973343	1	1	1	1	1	1
681.75757_24.347_9.03	0.129561	0.129561	0.129561	0.147691	1	1	0.147691	0.147691	1	0.490066	0.754725	0.951086	1	1	1	1	1	1
563.91058_24.303_7.96	0.0767507	0.489441	0.489441	0.29461	1	0.843554	0.29461	0.753436	0.843554	0.424266	0.910803	0.973343	1	1	1	1	1	1
257.16837_10.166_5.36	0.707876	0.678801	0.531939	0.997822	0.876889	0.999991	0.941028	0.998689	0.88855	0.879109	0.916995	0.973343	1	1	1	1	1	1
528.41048_27.679_7.73	0.942918	0.985036	0.417839	0.919053	0.939411	0.99998	0.999899	0.931354	0.949805	0.999651	0.999328	0.973343	1	1	1	1	1	1
219.17474_20.143_6.59	0.638477	0.657171	0.145603	0.882515	0.520101	0.999998	0.912223	0.874668	0.509033	0.878104	0.916995	0.972671	1	1	1	1	1	1
556.34268_24.259_7.69	0.130515	0.130515	0.130515	0.149246	1	1	0.149246	0.149246	1	0.490066	0.754725	0.951086	1	1	1	1	1	1
572.77991_24.309_7.87	0.131006	0.131006	0.131006	0.150047	1	1	0.150047	0.150047	1	0.490066	0.754725	0.951086	1	1	1	1	1	1
688.92799_24.363_9.11	0.130217	0.130217	0.130217	0.14876	1	1	0.14876	0.14876	1	0.490066	0.754725	0.951086	1	1	1	1	1	1
543.62025_24.222_7.56	0.129663	0.129663	0.129663	0.147858	1	1	0.147858	0.147858	1	0.490066	0.754725	0.951086	1	1	1	1	1	1
607.20250_24.166_8.32	0.0772006	0.526168	0.526168	0.314499	1	0.824481	0.314499	0.798528	0.824481	0.424266	0.910803	0.973343	1	1	1	1	1	1
679.75414_13.745_9.36	0.896258	0.27464	0.273016	0.809846	1	0.895525	0.811259	0.405701	0.894445	0.992237	0.871553	0.973343	1	1	1	1	1	1
450.19351_30.693_5.39	0.306629	0.331925	0.955149	0.895249	0.909748	0.487502	0.999978	0.878369	0.861646	0.687989	0.901352	0.999886	1	1	1	1	1	1
341.23036_31.112_6.31	0.0789685	0.589057	0.589057	0.794143	1	0.35107	0.794143	0.864154	0.35107	0.424266	0.916803	0.973343	1	1	1	1	1	1
321.89447_10.749_4.73	0.0771731	0.522023	0.522023	0.312303	0.793687	0.312303	0.826693	1	0.826693	0.424266	0.910803	0.973343	1	1	1	1	1	1
358.26490_29.226_6.52	0.513015	0.0769947	0.513015	0.782946	0.831219	0.831219	0.30727	0.30727	1	0.819363	0.754725	0.973343	1	1	1	1	1	1
208.10846_26.411_3.98	0.0782378	0.565274	0.565274	0.805453	1	0.337043	0.805453	0.841071	0.337043	0.424266	0.915164	0.973343	1	1	1	1	1	1
407.27739_32.281_6.84	0.987565	0.300645	0.300407	0.87008	1	0.879709	0.870245	0.454256	0.87955	0.999651	0.89009	0.973343	1	1	1	1	1	1
149.02377_17.811_3.53	0.0778249	0.551359	0.551359	0.812115	1	0.328901	0.812115	0.826586	0.328901	0.424266	0.91191	0.973343	1	1	1	1	1	1
331.88540_11.185_5.25	0.0791559	0.593762	0.593762	0.353954	0.868471	0.353954	0.792015	1	0.792015	0.424266	0.916803	0.973343	1	1	1	1	1	1
234.94616_1.166_4.48	0.515062	0.0773088	0.515062	1	0.309016	0.830832	0.309016	0.830832	0.785413	0.821269	0.754725	0.973343	1	1	1	1	1	1
284.20697_34.784_5.33	0.997885	0.299939	0.310436	0.880707	0.46259	0.873733	0.875346	0.999998	0.882276	0.999651	0.889846	0.973343	1	1	1	1	1	1
394.29333_34.771_7.10	0.0777483	0.547669	0.547669	0.813962	0.822624	0.813962	0.326821	1	0.326821	0.424266	0.911667	0.973343	1	1	1	1	1	1
263.13043_12.578_5.31	0.583319	0.0787887	0.583319	0.858778	0.796861	0.796861	0.347671	0.347671	1	0.862762	0.754725	0.973343	1	1	1	1	1	1
731.16701_30.678_9.01	0.620508	0.688323	0.140712	0.490222	0.530099	0.916596	0.999884	0.855019	0.884306	0.877263	0.916995	0.965732	1	1	1	1	1	1
304.89066_11.572_4.46	0.0772458	0.527891	0.527891	0.315488	0.800522	0.315488	0.823641	1	0.823641	0.424266	0.910803	0.973343	1	1	1	1	1	1
266.98275_2.816_5.07	0.0375028	0.916482	0.916482	0.374527	1	0.455705	0.374527	0.99875	0.455705	0.399953	0.999328	0.999886	1	1	1	1	1	1
137.02369_2.817_3.44	0.0384909	0.854124	0.854124	0.350531	1	0.49335	0.350531	0.993393	0.49335	0.399953	0.987595	0.999886	1	1	1	1	1	1
155.03429_2.815_3.87	0.038596	0.877999	0.877999	0.361857	1	0.481287	0.361857	0.996122	0.481287	0.399953	0.996875	0.999886	1	1	1	1	1	1
294.97772_2.817_5.28	0.0374561	0.902814	0.902814	0.367997	1	0.462461	0.367997	0.998034	0.462461	0.399953	0.999328	0.999886	1	1	1	1	1	1
455.18909_20.952_6.67	0.650232	0.625216	0.6622	0.999999	0.909197	0.999994	0.904829	0.999981	0.918087	0.878104	0.916803	0.973343	1	1	1	1	1	1
406.51638_35.143_7.51	0.628978	0.164577	0.619937	0.894623	0.527775	0.533261	0.905989	0.90935	1	0.877919	0.78636	0.973343	1	1	1	1	1	1
397.26931_34.393_7.34	0.965577	0.965577	0.0369571	0.394913	0.428241	1	0.999912	0.394913	0.428241	0.999651	0.999328	0.909353	1	1	1	1	1	1
289.21634_22.799_5.78	0.492022	0.492022	0.0766374	0.841886	0.841886	0.756766	1	0.295695	0.295695	0.802098	0.910803	0.951086	1	1	1	1	1	1
445.93273_26.588_6.02	0.162106	0.642997	0.611633	0.518983	0.999988	0.898295	0.537957	0.896818	0.910151	0.537037	0.916995	0.973343	1	1	1	1	1	1
507.32911_35.150_7.94	0.973785	0.961223	0.373731	0.908284	0.928163	0.999999	0.999926	0.904142	0.924522	0.999651	0.999328	0.973343	1	1	1	1	1	1
322.23814_25.297_6.04	0.0369529	0.990554	0.990554	0.40683	1	0.415974	0.40683	0.999998	0.415974	0.399953	0.999328	0.999886	1	1	1	1	1	1
644.49333_31.708_9.02	0.509033	0.509033	0.0768768	0.833127	0.833127	0.778102	1	0.304962	0.304962	0.815683	0.910803	0.951086	1	1	1	1	1	1
383.20145_33.973_7.18	0.530446	0.0773343	0.530446	1	0.317002	0.822446	0.317002	0.822446	0.80346	0.831711	0.754725	0.973343	1	1	1	1	1	1
304.89066_9.744_4.46	0.326614	0.981682	0.29476	0.999954	0.87796	0.884925	0.89793	0.863806	0.471989	0.701918	0.999328	0.973343	1	1	1	1	1	1
155.08197_1.354_3.93	0.521858	0.521858	0.0771058	0.826625	0.826625	0.793493	1	0.312069	0.312069	0.826068	0.910803	0.951086	1	1	1	1	1	1
280.19101_19.440_5.58	0.130313	0.130313	0.130313	1	1	0.148917	1	0.148917	0.148917	0.490066	0.754725	0.951086	1	1	1	1	1	1
370.29533_27.854_6.81	0.129639	0.129639	0.129639	1	1	0.147818	1	0.147818	0.147818	0.490066	0.754725	0.951086	1	1	1	1	1	1
383.31343_35.678_7.23	0.952292	0.387557	0.955301	1	0.909067	0.936412	0.908087	0.935605	0.999788	0.999651	0.908367	0.999886	1	1	1	1	1	1
244.29777_3.236_5.29	0.161076	0.641649	0.615142	0.51955	0.897685	0.535566	0.897798	0.999993	0.907886	0.536186	0.916803	0.973343	1	1	1	1	1	1
285.29025_25.498_6.47	0.534421	0.0774409	0.534421	1	0.319291	0.820515	0.319291	0.820515	0.807981	0.835248	0.754725	0.973343	1	1	1	1	1	1
356.26188_27.464_6.73	0.469469	0.469469	0.0764347	0.853711	0.853711	0.726884	1	0.283672	0.283672	0.78777	0.910803	0.951086	1	1	1	1	1	1
263.13646_34.615_4.93	0.187043	0.641813	0.564826	0.52563	0.99981	0.920466	0.573484	0.876467	0.94489	0.571986	0.916803	0.973343	1	1	1	1	1	1
257.22252_17.073_5.42	0.523998	0.523998	0.077198	0.825668	0.825668	0.796001	1	0.313375	0.313375	0.826639	0.910803	0.951086	1	1	1	1	1	1
346.23526_22.801_6.47	0.869405	0.869405	0.0375296	0.480208	0.480208	0.995249	1	0.353105	0.353105	0.976351	0.993963	0.909353	1	1	1	1	1	1
333.27790_33.832_6.61	0.156082	0.630121	0.637992	0.89417	1	0.520882	0.897264	0.902099	0.525609	0.523827	0.916803	0.973343	1	1	1	1	1	1
335.27943_29.618_6.55	0.413881	0.995105	0.985905	0.930015	0.999998	0.932579	0.935248	1	0.937703	0.752584	0.999328	0.999886	1	1	1	1	1	1
239.14898_11.557_4.80	0.370112	0.289675	0.930906	0.891776	0.839047	0.503539	0.999348	0.893127	0.935064	0.728676	0.879541	0.999886	1	1	1	1	1	1
378.29994_26.713_6.92	0.129565	0.129565	0.129565	1	1	0.147697	1	0.147697	0.147697	0.490066	0.754725	0.951086	1	1	1	1	1	1
379.08388_30.713_5.37	0.546735	0.546735	0.0777706	0.81453	0.81453	0.821613	1	0.326389	0.326389	0.844051	0.911667	0.951086	1	1	1	1	1	1
322.27412_28.325_6.38	0.527743	0.527743	0.077269	0.823778	0.823778	0.800352	1	0.315463	0.315463	0.829852	0.910803	0.951086	1	1	1	1	1	1
121.02881_30.972_3.26	0.992319	0.31567	0.298444	0.870565	0.46585	0.882001	0.887619	0.999993	0.876444	0.999651	0.89009	0.973343	1	1	1	1	1	1
345.13333_7.310_6.61	0.211999	0.655505	0.749143	0.669335	0.99972	0.933495	0.614618	0.945604	0.902555	0.600629	0.916995	0.981426	1	1	1	1	1	1
273.09483_4.840_6.52	0.0774316	0.533365	0.533365	0.821073	0.806786	0.821073	0.318725	1	0.318725	0.424266	0.910803	0.973343	1	1	1	1	1	1
481.01034_30.769_7.11	0.251085	0.251085	0.0272786	0.0870989	0.830794	1	0.363905	0.0870989	0.830794	0.629946	0.860886	0.909353	1	1	1	1	1	1
331.88516_14.065_5.25	0.204164	0.662037	0.186848	0.261736	0.585431	0.608582	0.926272	0.913339	0.999979	0.595961	0.916995	0.973343	1	1	1	1	1	1
275.05572_30.803_5.47	0.903253	0.246888	0.30843	0.841474	0.999578	0.872856	0.788992	0.410417	0.913618	0.995129	0.85754	0.973343	1	1	1	1	1	1
298.24377_32.610_6.25	0.299633	0.308899	0.999186	0.874643	0.880194	0.999999	0.460946	0.8808	0.874022	0.683157	0.89009	0.999886	1	1	1	1	1	1
212.01827_29.301_3.90	0.312159	0.297458	0.999091	0.882264	0.873193	0.999995	0.461853	0.872495	0.882935	0.690298	0.887944	0.999886	1	1	1	1	1	1
432.17968_26.415_7.75	0.0370114	0.954079	0.954079	0.389741	1	0.43422	0.389741	0.999792	0.43422	0.399953	0.999328	0.999886	1	1	1	1	1	1
149.02378_36.570_3.54	0.98964	0.408794	0.991005	0.999998	0.92939	0.929003	0.934749	0.934378	1	0.999651	0.910803	0.999886	1	1	1	1	1	1
443.22120_34.261_7.63	0.981114	0.382983	0.985419	1	0.91645	0.92648	0.915109	0.925228	0.99999	0.999651	0.907504	0.999886	1	1	1	1	1	1
171.11327_2.541_4.27	0.939735	0.939735	0.0370543	0.441608	0.441608	0.99953	1	0.38321	0.38321	0.999651	0.999328	0.909353	1	1	1	1	1	1
333.24009_32.255_6.62	0.373254	0.996546	0.995908	0.917652	1	0.915314	0.917456	1	0.915114	0.730639	0.999328	0.999886	1	1	1	1	1	1
586.03129_24.087_7.98	0.0778697	0.550169	0.550169	0.812879	1	0.328389	0.812879	0.825315	0.328389	0.424266	0.911667	0.973343	1	1	1	1	1	1
354.30016_29.567_6.66	0.715885	0.152223	0.570914	0.907714	0.916021	0.857455	0.565339	0.478849	0.998842	0.883343	0.775239	0.973343	1	1	1	1	1	1
251.04721_33.995_5.01	0.163761	0.592035	0.659999	0.893336	0.999876	0.509475	0.918753	0.895528	0.550665	0.540064	0.916803	0.973343	1	1	1	1	1	1
315.10527_10.096_5.50	0.995567	0.0722202	0.344985	0.900494	0.911419	0.550582	0.545819	0.211892	0.903483	0.999651	0.754725	0.973343	1	1	1	1	1	1
609.33983_31.661_8.37	0.973858	0.378613	0.997153	0.999997	0.919769	0.910715	0.926668	0.918031	0.999993	0.999651	0.907504	0.999886	1	1	1	1	1	1
641.15900_9.539_7.91	0.279448	0.00319696	0.279448	0.415982	0.410756	0.410756	0.023721	0.023721	1	0.65884	0.220417	0.973343	1	1	1	0.796501	1	1
219.17475_31.908_5.11	0.989808	0.989808	0.037474	0.409066	0.409066	0.999998	1	0.418962	0.418962	0.999651	0.999328	0.909353	1	1	1	1	1	1
215.17339_4.076_5.01	0.653788	0.64223	0.64967	1	1	0.912368	0.999999	0.9109	0.914997	0.878104	0.916803	0.973343	1	1	1	1	1	1
429.26086_34.062_7.52	0.676171	0.210728	0.657707	0.925196	0.93201	0.926227	0.625409	0.61435	0.999998	0.87872	0.834428	0.973343	1	1	1	1	1	1
378.35811_33.505_7.24	0.734425	0.711369	0.735927	0.961528	0.999995	0.999996	0.956074	0.956418	1	0.891461	0.916995	0.976833	1	1	1	1	1	1
351.26400_28.106_6.57	0.61187	0.61187	0.0800202	0.365422	0.365422	0.884322	1	0.784191	0.784191	0.873282	0.916803	0.951086	1	1	1	1	1	1
352.09464_7.618_6.19	0.54062	0.54062	0.0780854	0.323939	0.323939	0.814914	1	0.818648	0.818648	0.839834	0.910803	0.951086	1	1	1	1	1	1
578.06865_24.317_7.92	0.130651	0.130651	0.130651	0.149469	1	1	0.149469	0.149469	1	0.490066	0.754725	0.951086	1	1	1	1	1	1
219.35055_23.877_5.11	0.130002	0.130002	0.130002	0.148409	1	1	0.148409	0.148409	1	0.490066	0.754725	0.951086	1	1	1	1	1	1
219.40171_23.877_5.11	0.129998	0.129998	0.129998	0.148403	1	1	0.148403	0.148403	1	0.490066	0.754725	0.951086	1	1	1	1	1	1
432.15571_14.352_6.49	0.540078	0.540078	0.0775528	0.32246	0.81767	1	0.814314	0.32246	0.81767	0.839588	0.910803	0.951086	1	1	1	1	1	1
188.07106_3.553_4.36	0.0778073	0.549906	0.549906	0.812872	0.825033	0.812872	0.328111	1	0.328111	0.424266	0.911667	0.973343	1	1	1	1	1	1
580.02316_24.064_7.80	0.0776173	0.542382	0.542382	0.323795	1	0.816557	0.323795	0.816859	0.816557	0.424266	0.911291	0.973343	1	1	1	1	1	1
595.21535_24.388_8.29	0.129863	0.129863	0.129863	0.148183	1	1	0.148183	0.148183	1	0.490066	0.754725	0.951086	1	1	1	1	1	1
610.51471_24.406_8.35	0.130429	0.130429	0.130429	0.149105	1	1	0.149105	0.149105	1	0.490066	0.754725	0.951086	1	1	1	1	1	1
388.25418_9.786_6.26	0.292441	0.27681	0.933223	0.842179	0.883683	0.999993	0.425286	0.829716	0.894081	0.67628	0.874128	0.999886	1	1	1	1	1	1
446.21510_32.285_7.54	0.134245	0.134245	0.134245	1	1	0.155362	1	0.155362	0.155362	0.492842	0.754725	0.952002	1	1	1	1	1	1
571.05591_24.304_7.89	0.131801	0.131801	0.131801	0.151348	1	1	0.151348	0.151348	1	0.490682	0.754725	0.951086	1	1	1	1	1	1
219.60061_23.877_5.11	0.130005	0.130005	0.130005	0.148414	1	1	0.148414	0.148414	1	0.490066	0.754725	0.951086	1	1	1	1	1	1
304.70497_23.878_6.41	0.276236	0.276521	0.902154	0.815333	0.894695	1	0.410371	0.815577	0.894506	0.655798	0.874128	0.999886	1	1	1	1	1	1
614.70715_24.191_8.17	0.0777032	0.544768	0.544768	0.325221	1	0.81545	0.325221	0.819474	0.81545	0.424266	0.911667	0.973343	1	1	1	1	1	1
594.22041_24.369_8.12	0.130052	0.130052	0.130052	0.148491	1	1	0.148491	0.148491	1	0.490066	0.754725	0.951086	1	1	1	1	1	1
289.06854_3.628_5.34	0.227393	0.026138	0.227393	0.320263	0.845328	0.845328	0.0776344	0.0776344	1	0.613317	0.58208	0.973343	1	1	1	1	1	1
273.19741_4.812_5.12	0.0369115	0.0369115	0.0369115	0.0233118	1	1	0.0233118	0.0233118	1	0.399953	0.58208	0.909353	1	1	1	0.796501	1	1
675.57929_24.340_8.99	0.129572	0.129572	0.129572	0.147709	1	1	0.147709	0.147709	1	0.490066	0.754725	0.951086	1	1	1	1	1	1
443.18888_32.215_7.60	0.955991	0.955991	0.0372361	0.434424	0.434424	0.999817	1	0.39174	0.39174	0.999651	0.999328	0.909353	1	1	1	1	1	1
631.22061_24.218_8.28	0.130341	0.130341	0.130341	0.148962	1	1	0.148962	0.148962	1	0.490066	0.754725	0.951086	1	1	1	1	1	1
395.21931_30.119_6.75	0.664556	0.604846	0.156374	0.883834	0.506051	0.999918	0.902349	0.907281	0.541906	0.87872	0.916803	0.973343	1	1	1	1	1	1
556.48240_24.259_7.66	0.130386	0.130386	0.130386	0.149035	1	1	0.149035	0.149035	1	0.490066	0.754725	0.951086	1	1	1	1	1	1
614.36811_24.423_8.45	0.12957	0.12957	0.12957	0.147706	1	1	0.147706	0.147706	1	0.490066	0.754725	0.951086	1	1	1	1	1	1
567.20282_24.295_7.86	0.130129	0.130129	0.130129	0.148615	1	1	0.148615	0.148615	1	0.490066	0.754725	0.951086	1	1	1	1	1	1
587.93234_24.345_8.01	0.129582	0.129582	0.129582	0.147725	1	1	0.147725	0.147725	1	0.490066	0.754725	0.951086	1	1	1	1	1	1
383.25798_25.501_6.33	0.857052	0.639164	0.651471	0.968211	0.910439	0.965699	0.996728	0.999999	0.997273	0.968594	0.916803	0.973343	1	1	1	1	1	1
305.03145_9.037_4.94	0.129601	0.129601	0.129601	0.147755	1	1	0.147755	0.147755	1	0.490066	0.754725	0.951086	1	1	1	1	1	1
580.35248_24.077_7.99	0.0773259	0.524989	0.524989	0.314171	1	0.825426	0.314171	0.797158	0.825426	0.424266	0.910803	0.973343	1	1	1	1	1	1
622.04409_24.212_8.50	0.129582	0.129582	0.129582	0.147724	1	1	0.147724	0.147724	1	0.490066	0.754725	0.951086	1	1	1	1	1	1
594.69827_24.118_8.03	0.130176	0.130176	0.130176	0.148693	1	1	0.148693	0.148693	1	0.490066	0.754725	0.951086	1	1	1	1	1	1
401.26838_25.501_6.85	0.840041	0.953232	0.429585	0.973435	0.927032	0.9996	0.997617	0.951248	0.89009	0.960539	0.999328	0.973343	1	1	1	1	1	1
262.59859_4.640_3.87	0.233524	0.026361	0.233524	0.331547	0.841057	0.841057	0.0799085	0.0799085	1	0.616294	0.58208	0.973343	1	1	1	1	1	1
624.37844_24.215_8.47	0.0786427	0.551186	0.551186	0.81418	1	0.330667	0.81418	0.826402	0.330667	0.424266	0.91191	0.973343	1	1	1	1	1	1
387.23778_25.366_6.56	0.317083	0.268479	0.957307	0.900743	0.868507	0.438926	0.999815	0.833297	0.869635	0.693149	0.871201	0.999886	1	1	1	1	1	1
601.36221_24.405_8.39	0.0762964	0.452759	0.452759	0.274797	1	0.862449	0.274797	0.703603	0.862449	0.424266	0.910803	0.973343	1	1	1	1	1	1
307.22453_32.935_6.39	0.302271	0.956973	0.280602	0.437548	0.843021	0.859297	0.891904	0.877474	0.999983	0.685309	0.999328	0.973343	1	1	1	1	1	1
315.14347_20.445_5.67	0.358273	0.925846	0.867666	0.860697	0.999946	0.9314	0.883275	0.997639	0.946669	0.724216	0.999328	0.999886	1	1	1	1	1	1
639.05372_24.255_8.63	0.0767075	0.500071	0.500071	0.299984	1	0.837644	0.299984	0.766992	0.837644	0.424266	0.910803	0.973343	1	1	1	1	1	1
287.18539_21.735_5.64	0.564276	0.140228	0.753604	0.917925	0.566824	0.455654	0.906597	0.82458	0.997504	0.853243	0.755364	0.982084	1	1	1	1	1	1
153.13327_4.824_3.51	0.957078	0.957078	0.0373057	0.43424	0.43424	0.99983	1	0.392594	0.392594	0.999651	0.999328	0.909353	1	1	1	1	1	1
676.22772_30.669_8.87	0.325852	0.289531	0.992277	0.888306	0.870287	0.999931	0.466457	0.864239	0.893801	0.700911	0.879541	0.999886	1	1	1	1	1	1
213.11223_13.470_4.48	0.224174	0.681974	0.67079	0.638709	1	0.933039	0.645343	0.931147	0.936366	0.611147	0.916995	0.973343	1	1	1	1	1	1
269.16464_25.127_5.56	0.985667	0.0665529	0.379103	0.923432	0.881406	0.522674	0.537961	0.218235	0.914699	0.999651	0.754725	0.973343	1	1	1	1	1	1
653.72969_24.288_8.77	0.0767752	0.504905	0.504905	0.302617	1	0.835153	0.302617	0.773021	0.835153	0.424266	0.910803	0.973343	1	1	1	1	1	1
214.21678_30.430_5.57	0.377742	0.380735	0.358454	0.571975	0.999989	1	0.590588	0.57443	0.999993	0.733184	0.907504	0.973343	1	1	1	1	1	1
405.22351_27.529_6.58	0.385915	0.420347	0.979404	0.915949	0.941773	0.999966	0.628716	0.930777	0.928237	0.738143	0.910803	0.999886	1	1	1	1	1	1
355.13649_20.454_5.84	0.0952499	0.362643	0.328764	0.241321	0.999956	0.937093	0.260797	0.533583	0.950666	0.461321	0.906194	0.973343	1	1	1	1	1	1
280.02471_1.182_4.84	0.381824	0.968723	0.996798	0.921342	0.999989	0.929525	0.910626	0.999994	0.919408	0.736032	0.999328	0.999886	1	1	1	1	1	1
219.17476_24.629_6.63	0.665907	0.646459	0.139149	0.862896	0.502932	0.999997	0.918051	0.871371	0.514343	0.87872	0.916995	0.961095	1	1	1	1	1	1
257.13812_20.928_5.12	0.0777937	0.313192	0.313518	0.205105	1	0.936052	0.204933	0.477274	0.935901	0.424266	0.89009	0.973343	1	1	1	1	1	1
307.03267_4.640_3.89	0.580362	0.128317	0.136544	0.459253	0.999994	0.886185	0.445189	0.152292	0.896077	0.861745	0.754725	0.954958	1	1	1	1	1	1
145.03355_4.511_3.19	0.354622	0.0866147	0.371217	0.563317	0.922	0.929533	0.241966	0.251075	0.999995	0.723262	0.754725	0.973343	1	1	1	1	1	1
325.97531_3.629_5.21	0.684554	0.634585	0.749665	0.999908	0.939845	0.999954	0.920227	0.999472	0.953232	0.878992	0.916803	0.981522	1	1	1	1	1	1
592.36082_24.120_8.13	0.0775918	0.54244	0.54244	0.323768	1	0.816463	0.323768	0.816923	0.816463	0.424266	0.911291	0.973343	1	1	1	1	1	1
373.22190_24.841_6.41	0.598821	0.145009	0.700733	0.913003	0.544609	0.484338	0.898022	0.855084	0.999603	0.866527	0.759508	0.973343	1	1	1	1	1	1
233.98249_3.833_4.36	0.643095	0.599201	0.803188	0.998651	0.943759	0.999966	0.891828	0.997113	0.955441	0.878104	0.916803	0.999886	1	1	1	1	1	1
585.17052_4.639_7.54	0.92994	0.0652741	0.322608	0.862546	0.910032	0.563724	0.489137	0.188338	0.91284	0.999651	0.754725	0.973343	1	1	1	1	1	1
307.03285_16.481_4.96	0.229392	0.255651	0.686423	0.654138	0.948724	0.999956	0.347628	0.683468	0.934836	0.614283	0.863367	0.973343	1	1	1	1	1	1
320.58453_9.045_4.11	0.636249	0.198265	0.636209	0.903748	0.930453	0.930441	0.585241	0.585217	1	0.878104	0.826204	0.973343	1	1	1	1	1	1
263.02106_4.332_4.64	0.202144	0.665573	0.643329	0.594644	0.999996	0.923714	0.608085	0.916857	0.930837	0.59246	0.916995	0.973343	1	1	1	1	1	1
304.02432_4.479_3.78	0.968632	0.0679447	0.340053	0.888259	0.905899	0.551629	0.518106	0.201707	0.909708	0.999651	0.754725	0.973343	1	1	1	1	1	1
263.02133_16.484_4.64	0.240783	0.204946	0.666667	0.655555	0.925322	0.999863	0.310917	0.612369	0.946625	0.620534	0.831474	0.973343	1	1	1	1	1	1
647.21960_24.275_8.54	0.131487	0.131487	0.131487	0.150834	1	1	0.150834	0.150834	1	0.490189	0.754725	0.951086	1	1	1	1	1	1
610.36900_24.175_8.23	0.129682	0.129682	0.129682	0.147888	1	1	0.147888	0.147888	1	0.490066	0.754725	0.951086	1	1	1	1	1	1
595.07236_24.389_8.32	0.0762904	0.471333	0.471333	0.284326	1	0.852378	0.284326	0.729421	0.852378	0.424266	0.910803	0.973343	1	1	1	1	1	1
587.21668_24.349_8.05	0.0771514	0.490897	0.490897	0.29622	1	0.84367	0.29622	0.755317	0.84367	0.424266	0.910803	0.973343	1	1	1	1	1	1
591.21358_24.371_8.20	0.0762019	0.462219	0.462219	0.279461	1	0.857128	0.279461	0.7169	0.857128	0.424266	0.910803	0.973343	1	1	1	1	1	1
659.74490_24.296_8.78	0.0777141	0.544344	0.544344	0.325027	1	0.81571	0.325027	0.81901	0.81571	0.424266	0.911667	0.973343	1	1	1	1	1	1
568.21419_24.289_7.79	0.133398	0.133398	0.133398	0.153968	1	1	0.153968	0.153968	1	0.491864	0.754725	0.951632	1	1	1	1	1	1
616.71151_24.185_8.31	0.129612	0.129612	0.129612	0.147774	1	1	0.147774	0.147774	1	0.490066	0.754725	0.951086	1	1	1	1	1	1
556.62440_24.263_7.73	0.0761019	0.445001	0.445001	0.270412	1	0.866209	0.270412	0.692475	0.866209	0.424266	0.910803	0.973343	1	1	1	1	1	1
551.33245_24.272_7.86	0.0772743	0.529149	0.529149	0.3162	1	0.823017	0.3162	0.801972	0.823017	0.424266	0.910803	0.973343	1	1	1	1	1	1
591.50300_24.365_8.17	0.129727	0.129727	0.129727	0.147962	1	1	0.147962	0.147962	1	0.490066	0.754725	0.951086	1	1	1	1	1	1
340.47862_13.743_5.12	0.286648	0.341104	0.974526	0.875071	0.890984	0.999776	0.476708	0.908351	0.854978	0.669254	0.902217	0.999886	1	1	1	1	1	1
562.91405_24.282_7.79	0.0786464	0.550126	0.550126	0.330126	1	0.814771	0.330126	0.825268	0.814771	0.424266	0.911667	0.973343	1	1	1	1	1	1
653.89633_24.287_8.77	0.077288	0.522973	0.522973	0.313047	1	0.826444	0.313047	0.794802	0.826444	0.424266	0.910803	0.973343	1	1	1	1	1	1
340.54230_13.743_5.12	0.586774	0.650471	0.699621	0.908099	0.999958	0.999896	0.889607	0.930216	0.999453	0.863043	0.916995	0.973343	1	1	1	1	1	1
258.13388_7.936_5.06	0.053084	0.0513944	0.0571087	0.0422075	0.99998	0.999999	0.0390297	0.0412116	0.999993	0.424266	0.675304	0.951086	1	1	1	1	1	1
499.26247_4.124_7.36	0.07991	0.608886	0.608886	0.78556	1	0.363605	0.78556	0.881793	0.363605	0.42455	0.916803	0.973343	1	1	1	1	1	1
610.69827_24.180_8.37	0.129547	0.129547	0.129547	0.147668	1	1	0.147668	0.147668	1	0.490066	0.754725	0.951086	1	1	1	1	1	1
580.64991_24.327_7.95	0.0769808	0.515915	0.515915	0.308732	1	0.829594	0.308732	0.786436	0.829594	0.424266	0.910803	0.973343	1	1	1	1	1	1
199.10235_25.349_4.34	0.620103	0.621969	0.168157	0.912508	0.534366	1	0.891884	0.911831	0.533229	0.877263	0.916803	0.973343	1	1	1	1	1	1
597.36025_24.387_8.25	0.129532	0.129532	0.129532	0.147644	1	1	0.147644	0.147644	1	0.490066	0.754725	0.951086	1	1	1	1	1	1
290.24811_22.801_6.30	0.336972	0.331387	0.462111	0.998333	0.613302	1	0.514053	0.998072	0.618306	0.708094	0.901207	0.973343	1	1	1	1	1	1
219.17466_22.487_6.76	0.654949	0.633149	0.148432	0.878918	0.510491	0.999996	0.909501	0.887913	0.523448	0.878104	0.916803	0.972671	1	1	1	1	1	1
219.31239_22.493_5.12	0.61603	0.621281	0.170324	0.915857	0.53715	1	0.889948	0.913978	0.533943	0.875495	0.916803	0.973343	1	1	1	1	1	1
390.23418_19.039_6.80	0.65807	0.630516	0.149363	0.878688	0.510427	0.999992	0.90966	0.89001	0.526815	0.878104	0.916803	0.973343	1	1	1	1	1	1
580.79147_24.329_7.97	0.129549	0.129549	0.129549	0.147671	1	1	0.147671	0.147671	1	0.490066	0.754725	0.951086	1	1	1	1	1	1
218.12845_25.349_7.11	0.625751	0.641779	0.156591	0.899482	0.528677	0.999998	0.901863	0.8932	0.519048	0.877336	0.916803	0.973343	1	1	1	1	1	1
263.23697_30.313_5.77	0.130032	0.130032	0.130032	1	0.148457	1	0.148457	1	0.148457	0.490066	0.754725	0.951086	1	1	1	1	1	1
650.39446_24.286_8.75	0.0761661	0.453197	0.453197	0.274754	1	0.86193	0.274754	0.704226	0.86193	0.424266	0.910803	0.973343	1	1	1	1	1	1
462.36852_25.622_7.82	0.630809	0.656808	0.148425	0.888858	0.524536	0.999993	0.909314	0.878133	0.509083	0.878057	0.916995	0.972671	1	1	1	1	1	1
601.22004_24.403_8.34	0.076597	0.494621	0.494621	0.296943	1	0.840372	0.296943	0.760093	0.840372	0.424266	0.910803	0.973343	1	1	1	1	1	1
269.10001_12.710_5.05	0.938949	0.383677	0.448781	0.930494	0.999784	0.938412	0.901717	0.648253	0.960089	0.999651	0.907504	0.973343	1	1	1	1	1	1
618.95078_24.427_8.43	0.129533	0.129533	0.129533	0.147645	1	1	0.147645	0.147645	1	0.490066	0.754725	0.951086	1	1	1	1	1	1
696.92543_24.385_9.21	0.129596	0.129596	0.129596	0.147747	1	1	0.147747	0.147747	1	0.490066	0.754725	0.951086	1	1	1	1	1	1
704.42984_24.398_9.28	0.129714	0.129714	0.129714	0.14794	1	1	0.14794	0.14794	1	0.490066	0.754725	0.951086	1	1	1	1	1	1
642.05861_24.260_8.58	0.0769131	0.510124	0.510124	0.305603	1	0.832613	0.305603	0.779436	0.832613	0.424266	0.910803	0.973343	1	1	1	1	1	1
689.42425_24.367_9.07	0.129576	0.129576	0.129576	0.147715	1	1	0.147715	0.147715	1	0.490066	0.754725	0.951086	1	1	1	1	1	1
581.78242_24.337_8.02	0.129533	0.129533	0.129533	0.147645	1	1	0.147645	0.147645	1	0.490066	0.754725	0.951086	1	1	1	1	1	1
628.38152_24.228_8.52	0.0768068	0.482868	0.482868	0.291349	1	0.847262	0.291349	0.744853	0.847262	0.424266	0.910803	0.973343	1	1	1	1	1	1
551.47543_24.258_7.74	0.129619	0.129619	0.129619	0.147785	1	1	0.147785	0.147785	1	0.490066	0.754725	0.951086	1	1	1	1	1	1
631.38625_24.229_8.43	0.130518	0.130518	0.130518	0.149251	1	1	0.149251	0.149251	1	0.490066	0.754725	0.951086	1	1	1	1	1	1
594.36117_24.372_8.17	0.130383	0.130383	0.130383	0.14903	1	1	0.14903	0.14903	1	0.490066	0.754725	0.951086	1	1	1	1	1	1
718.03666_24.170_9.27	0.129556	0.129556	0.129556	0.147683	1	1	0.147683	0.147683	1	0.490066	0.754725	0.951086	1	1	1	1	1	1
608.38158_24.157_8.22	0.12954	0.12954	0.12954	0.147656	1	1	0.147656	0.147656	1	0.490066	0.754725	0.951086	1	1	1	1	1	1
683.57990_24.352_9.06	0.129534	0.129534	0.129534	0.147648	1	1	0.147648	0.147648	1	0.490066	0.754725	0.951086	1	1	1	1	1	1
453.84425_15.976_6.02	0.0776443	0.538246	0.538246	0.321721	1	0.818898	0.321721	0.812276	0.818898	0.424266	0.910803	0.973343	1	1	1	1	1	1
683.21662_24.047_8.97	0.0369598	0.98078	0.98078	0.402173	1	0.420779	0.402173	0.999985	0.420779	0.399953	0.999328	0.999886	1	1	1	1	1	1
588.78287_24.377_8.28	0.0767368	0.50305	0.50305	0.301579	1	0.83608	0.301579	0.770717	0.83608	0.424266	0.910803	0.973343	1	1	1	1	1	1
559.62377_24.290_7.90	0.0767944	0.506157	0.506157	0.303303	1	0.834511	0.303303	0.774569	0.834511	0.424266	0.910803	0.973343	1	1	1	1	1	1
597.79348_24.379_8.24	0.129624	0.129624	0.129624	0.147794	1	1	0.147794	0.147794	1	0.490066	0.754725	0.951086	1	1	1	1	1	1
679.07942_24.352_9.04	0.130531	0.130531	0.130531	0.149273	1	1	0.149273	0.149273	1	0.490066	0.754725	0.951086	1	1	1	1	1	1
597.64806_24.382_8.21	0.0770455	0.494751	0.494751	0.297978	1	0.841329	0.297978	0.760259	0.841329	0.424266	0.910803	0.973343	1	1	1	1	1	1
594.50473_24.365_8.15	0.0764885	0.486168	0.486168	0.292366	1	0.844743	0.292366	0.749182	0.844743	0.424266	0.910803	0.973343	1	1	1	1	1	1
614.37355_24.187_8.36	0.0775417	0.539751	0.539751	0.322267	1	0.817823	0.322267	0.813951	0.817823	0.424266	0.910803	0.973343	1	1	1	1	1	1
636.38647_24.248_8.57	0.0767642	0.494513	0.494513	0.297248	1	0.840815	0.297248	0.759955	0.840815	0.424266	0.910803	0.973343	1	1	1	1	1	1
599.69850_24.143_8.19	0.0774145	0.535345	0.535345	0.319708	1	0.819943	0.319708	0.809023	0.819943	0.424266	0.910803	0.973343	1	1	1	1	1	1
638.88969_24.252_8.62	0.13011	0.13011	0.13011	0.148585	1	1	0.148585	0.148585	1	0.490066	0.754725	0.951086	1	1	1	1	1	1
691.82007_24.090_9.05	0.078048	0.557857	0.557857	0.33277	1	0.809077	0.33277	0.833441	0.809077	0.424266	0.913819	0.973343	1	1	1	1	1	1
590.86830_24.111_8.07	0.0773503	0.529322	0.529322	0.316459	1	0.823103	0.316459	0.802171	0.823103	0.424266	0.910803	0.973343	1	1	1	1	1	1
564.05385_24.289_7.82	0.0770241	0.517141	0.517141	0.309459	1	0.829023	0.309459	0.787902	0.829023	0.424266	0.910803	0.973343	1	1	1	1	1	1
666.91441_24.315_8.85	0.0770439	0.518453	0.518453	0.310178	1	0.828349	0.310178	0.789465	0.828349	0.424266	0.910803	0.973343	1	1	1	1	1	1
623.05721_24.200_8.38	0.0761842	0.459673	0.459673	0.278117	1	0.858469	0.278117	0.713352	0.858469	0.424266	0.910803	0.973343	1	1	1	1	1	1
668.90446_24.320_8.91	0.129557	0.129557	0.129557	0.147684	1	1	0.147684	0.147684	1	0.490066	0.754725	0.951086	1	1	1	1	1	1
652.40708_24.278_8.71	0.0782285	0.548957	0.548957	0.814411	1	0.328576	0.814411	0.824013	0.328576	0.424266	0.911667	0.973343	1	1	1	1	1	1
614.54003_24.190_8.40	0.0770973	0.492609	0.492609	0.296986	1	0.842615	0.296986	0.757518	0.842615	0.424266	0.910803	0.973343	1	1	1	1	1	1
566.05659_24.308_7.96	0.0776243	0.52603	0.52603	0.31537	1	0.82556	0.31537	0.798368	0.82556	0.424266	0.910803	0.973343	1	1	1	1	1	1
545.04291_24.250_7.79	0.0765799	0.486076	0.486076	0.292514	1	0.845001	0.292514	0.749061	0.845001	0.424266	0.910803	0.973343	1	1	1	1	1	1
623.22011_24.199_8.34	0.0273949	0.26057	0.26057	0.0902554	1	0.82313	0.0902554	0.381366	0.82313	0.399953	0.865474	0.973343	1	1	1	1	1	1
557.05177_24.283_7.88	0.0780226	0.486865	0.486865	0.295996	1	0.847809	0.295996	0.750091	0.847809	0.424266	0.910803	0.973343	1	1	1	1	1	1
621.04373_24.206_8.38	0.0136498	0.62497	0.62497	0.140622	1	0.421997	0.140622	0.895037	0.421997	0.316944	0.916803	0.973343	1	1	1	1	1	1
727.04161_24.178_9.37	0.0779792	0.555402	0.555402	0.331343	1	0.810262	0.331343	0.830869	0.810262	0.424266	0.913649	0.973343	1	1	1	1	1	1
709.43100_24.139_9.21	0.0774781	0.530851	0.530851	0.317532	1	0.822567	0.317532	0.803923	0.822567	0.424266	0.910803	0.973343	1	1	1	1	1	1
724.56923_13.746_9.52	0.571239	0.644279	0.686923	0.897309	0.999972	0.99984	0.880376	0.924252	0.999393	0.856119	0.916995	0.973343	1	1	1	1	1	1
571.85440_24.060_7.97	0.130113	0.130113	0.130113	1	1	0.14859	1	0.14859	0.14859	0.490066	0.754725	0.951086	1	1	1	1	1	1
668.73856_24.320_8.92	0.0764702	0.485818	0.485818	0.292147	1	0.844892	0.292147	0.748724	0.844892	0.424266	0.910803	0.973343	1	1	1	1	1	1
276.72756_13.743_5.33	0.596254	0.646758	0.595142	0.870224	0.999945	0.999949	0.892071	0.891612	1	0.865422	0.916995	0.973343	1	1	1	1	1	1
582.35185_24.356_8.18	0.0764138	0.481891	0.481891	0.290009	1	0.846907	0.290009	0.743563	0.846907	0.424266	0.910803	0.973343	1	1	1	1	1	1
636.55234_24.248_8.56	0.0764011	0.461206	0.461206	0.279355	1	0.858114	0.279355	0.715491	0.858114	0.424266	0.910803	0.973343	1	1	1	1	1	1
572.01572_24.076_8.05	0.0775703	0.491164	0.491164	0.84447	1	0.297254	0.84447	0.755661	0.297254	0.424266	0.910803	0.973343	1	1	1	1	1	1
615.88257_24.182_8.26	0.0134286	0.562364	0.562364	0.123633	1	0.455479	0.123633	0.838102	0.455479	0.316944	0.915164	0.973343	1	1	1	1	1	1
340.76088_13.744_6.07	0.390008	0.936972	0.921289	0.898909	0.999999	0.941374	0.904229	0.999236	0.945312	0.740451	0.999328	0.999886	1	1	1	1	1	1
397.30257_14.891_5.51	0.184079	0.651853	0.237269	0.287199	0.948784	0.914664	0.575447	0.642694	0.999488	0.566487	0.916995	0.973343	1	1	1	1	1	1
453.34292_15.977_6.02	0.357755	0.917767	0.40196	0.590908	0.950356	0.933417	0.879962	0.90367	0.999919	0.724216	0.999328	0.973343	1	1	1	1	1	1
390.21921_13.744_4.94	0.404317	0.441949	0.442898	0.660351	1	0.99996	0.65965	0.688733	0.999957	0.746383	0.910803	0.973343	1	1	1	1	1	1
684.51883_13.748_9.24	0.206282	0.6498	0.237547	0.309413	0.949461	0.931564	0.603919	0.641773	0.999908	0.596707	0.916995	0.973343	1	1	1	1	1	1
313.25611_25.973_5.88	0.987962	0.0370023	0.987962	1	0.417486	0.40583	0.417486	0.40583	0.999996	0.999651	0.58208	0.999886	1	1	1	1	1	1
316.02430_7.613_5.26	0.09746	0.0773004	0.372086	0.269836	0.906679	0.999751	0.0827444	0.235018	0.935802	0.468266	0.754725	0.973343	1	1	1	1	1	1
395.04843_9.533_5.85	0.192861	0.647526	0.209242	0.271826	0.934177	0.922939	0.584892	0.606312	0.999983	0.580842	0.916995	0.973343	1	1	1	1	1	1
623.88244_24.205_8.24	0.0765752	0.491272	0.491272	0.295175	1	0.842153	0.295175	0.7558	0.842153	0.424266	0.910803	0.973343	1	1	1	1	1	1
586.20058_24.089_7.99	0.0268347	0.245453	0.245453	0.0844652	1	0.833137	0.0844652	0.353527	0.833137	0.399953	0.855271	0.973343	1	1	1	1	1	1
645.23466_24.259_8.58	0.037028	0.950748	0.950748	0.388252	1	0.435964	0.388252	0.999743	0.435964	0.399953	0.999328	0.999886	1	1	1	1	1	1
615.55127_24.178_8.30	0.0796019	0.600926	0.600926	0.789176	1	0.358729	0.789176	0.874886	0.358729	0.42455	0.916803	0.973343	1	1	1	1	1	1
601.04388_24.136_8.14	0.0780167	0.540188	0.540188	0.818721	1	0.323561	0.818721	0.814436	0.323561	0.424266	0.910803	0.973343	1	1	1	1	1	1
557.67649_23.986_7.70	0.0771069	0.521124	0.521124	0.827031	1	0.311693	0.827031	0.792628	0.311693	0.424266	0.910803	0.973343	1	1	1	1	1	1
637.56423_24.240_8.56	0.0772714	0.528333	0.528333	0.823459	1	0.315773	0.823459	0.801033	0.315773	0.424266	0.910803	0.973343	1	1	1	1	1	1
624.71277_24.210_8.46	0.0132934	0.54433	0.54433	0.118539	1	0.464719	0.118539	0.818995	0.464719	0.316944	0.911667	0.973343	1	1	1	1	1	1
451.16467_25.755_7.28	0.21199	0.21199	0.0257275	0.0722752	0.857181	1	0.292004	0.0722752	0.857181	0.600629	0.834428	0.909353	1	1	1	1	1	1
283.20576_26.212_5.85	0.948247	0.0377858	0.948247	0.999702	0.441102	0.441102	0.39074	0.39074	1	0.999651	0.58208	0.999886	1	1	1	1	1	1
290.26918_20.910_6.35	0.129586	0.129586	0.129586	1	0.147732	1	0.147732	1	0.147732	0.490066	0.754725	0.951086	1	1	1	1	1	1
299.20058_26.935_6.04	0.979687	0.0372775	0.979687	0.999982	0.403224	0.403224	0.422927	0.422927	1	0.999651	0.58208	0.999886	1	1	1	1	1	1
638.55830_24.246_8.57	0.0374305	0.0374305	0.0374305	0.0237999	1	1	0.0237999	0.0237999	1	0.399953	0.58208	0.909353	1	1	1	0.796501	1	1
204.96720_9.762_3.90	0.522547	0.522547	0.0771197	0.312454	0.312454	0.794302	1	0.826279	0.826279	0.826068	0.910803	0.951086	1	1	1	1	1	1
339.19307_28.923_6.52	0.138588	0.138588	0.138588	0.162552	0.162552	0.162552	1	1	1	0.494741	0.754725	0.960656	1	1	1	1	1	1
451.16435_26.528_7.26	0.219767	0.219767	0.026035	0.0751618	0.851752	1	0.306252	0.0751618	0.851752	0.607142	0.842338	0.909353	1	1	1	1	1	1
263.99552_5.273_5.49	0.0265146	0.238337	0.238337	0.0816633	1	0.83761	0.0816633	0.340414	0.83761	0.399953	0.853946	0.973343	1	1	1	1	1	1
545.81920_28.869_6.78	0.078028	0.557877	0.557877	0.809017	1	0.332734	0.809017	0.833462	0.332734	0.424266	0.913819	0.973343	1	1	1	1	1	1
265.07080_8.651_5.31	0.312475	0.320499	0.963931	0.895736	0.900471	0.482824	0.999999	0.874431	0.869128	0.690298	0.89009	0.999886	1	1	1	1	1	1
255.08433_10.497_4.88	0.0369313	0.0369313	0.0369313	0.0233303	1	1	0.0233303	0.0233303	1	0.399953	0.58208	0.909353	1	1	1	0.796501	1	1
167.91752_3.422_4.02	0.372987	0.110768	0.42344	0.62047	0.930215	0.949333	0.291613	0.321877	0.99989	0.730639	0.754725	0.973343	1	1	1	1	1	1
392.22409_9.512_5.83	0.633238	0.678195	0.687526	0.999941	1	0.917639	0.999966	0.935049	0.920748	0.878104	0.916995	0.973343	1	1	1	1	1	1
262.23777_12.923_5.83	0.129743	0.129743	0.129743	1	0.147987	1	0.147987	1	0.147987	0.490066	0.754725	0.951086	1	1	1	1	1	1
364.58240_30.699_5.89	0.328434	0.285097	0.995382	0.890968	0.862233	0.4645	0.999881	0.86589	0.89423	0.70389	0.877642	0.999886	1	1	1	1	1	1
330.07776_26.855_5.86	0.431613	0.350911	0.341085	0.599362	0.999999	0.999535	0.60796	0.534541	0.999327	0.759534	0.902217	0.973343	1	1	1	1	1	1
267.20693_4.883_5.38	0.370253	0.372563	0.374655	0.579372	1	1	0.577638	0.581294	1	0.728676	0.907504	0.973343	1	1	1	1	1	1
612.16332_37.486_8.07	0.51128	0.0768924	0.51128	0.780842	0.831931	0.831931	0.306152	0.306152	1	0.818351	0.754725	0.973343	1	1	1	1	1	1
373.16839_8.373_6.22	0.583895	0.130319	0.135764	0.460057	0.999998	0.887182	0.450759	0.153344	0.893724	0.862762	0.754725	0.954958	1	1	1	1	1	1
313.14706_7.415_5.55	0.0369321	0.0369321	0.0369321	0.0233311	1	1	0.0233311	0.0233311	1	0.399953	0.58208	0.909353	1	1	1	0.796501	1	1
253.19128_3.910_5.22	0.373642	0.342784	0.40234	0.604595	0.999794	0.999969	0.555086	0.578235	0.999979	0.730741	0.902217	0.973343	1	1	1	1	1	1
455.11442_30.682_7.33	0.968748	0.306365	0.323265	0.878034	0.479735	0.866849	0.89028	0.999993	0.900427	0.999651	0.89009	0.973343	1	1	1	1	1	1
477.01439_30.700_6.99	0.150865	0.617301	0.130944	0.165929	0.873558	0.89691	0.504913	0.471576	0.999929	0.518339	0.916803	0.951086	1	1	1	1	1	1
243.08413_5.884_4.76	0.165214	0.186205	0.184196	0.224382	1	0.999952	0.226082	0.243446	0.999964	0.541356	0.818818	0.973343	1	1	1	1	1	1
663.06574_24.319_8.89	0.0775682	0.541108	0.541108	0.323027	1	0.81714	0.323027	0.815454	0.81714	0.424266	0.910803	0.973343	1	1	1	1	1	1
627.38425_24.220_8.43	0.130076	0.130076	0.130076	1	1	0.148531	1	0.148531	0.148531	0.490066	0.754725	0.951086	1	1	1	1	1	1
271.07889_5.487_4.98	0.28005	0.00319273	0.28005	0.417083	0.40999	0.40999	0.023752	0.023752	1	0.659483	0.220417	0.973343	1	1	1	0.796501	1	1
262.01387_9.053_4.61	0.70299	0.213976	0.673124	0.938041	0.929335	0.919784	0.645273	0.627657	0.999991	0.879109	0.834428	0.973343	1	1	1	1	1	1
233.18384_4.087_6.18	0.993481	0.319852	0.286488	0.862499	0.458428	0.885059	0.889774	0.999945	0.867644	0.999651	0.89009	0.973343	1	1	1	1	1	1
533.20135_4.109_7.17	0.0370822	0.0370822	0.0370822	0.0234719	1	1	0.0234719	0.0234719	1	0.399953	0.58208	0.909353	1	1	1	0.796501	1	1
406.05632_9.532_4.25	0.00545341	0.07222	0.07222	0.0100754	1	0.824756	0.0100754	0.0630528	0.824756	0.262063	0.754725	0.951086	1	1	1	0.796501	1	1
297.09469_11.939_5.17	0.0762668	0.283101	0.314835	0.20329	0.999951	0.947633	0.186559	0.450898	0.933055	0.424266	0.877642	0.973343	1	1	1	1	1	1
333.24001_32.607_6.53	0.971809	0.388785	0.986161	0.999999	0.919348	0.931587	0.914917	0.927531	0.99998	0.999651	0.908367	0.999886	1	1	1	1	1	1
299.11073_30.749_4.87	0.37517	0.368697	0.372819	0.581933	1	1	0.578497	0.576551	1	0.731439	0.907504	0.973343	1	1	1	1	1	1
640.19443_37.488_8.17	0.291777	0.283079	0.94405	0.846244	0.884009	0.999999	0.430486	0.839485	0.889805	0.676078	0.877642	0.999886	1	1	1	1	1	1
653.04675_4.488_7.60	0.568782	0.0133472	0.568782	0.844609	0.450495	0.450495	0.124755	0.124755	1	0.854928	0.407809	0.973343	1	1	1	1	1	1
275.06851_23.321_5.01	0.953306	0.0369722	0.953306	0.999781	0.434402	0.434402	0.389184	0.389184	1	0.999651	0.58208	0.999886	1	1	1	1	1	1
349.04360_16.482_5.38	0.0913665	0.40052	0.375243	0.261449	0.999986	0.915466	0.27555	0.604481	0.926808	0.451975	0.909413	0.973343	1	1	1	1	1	1
303.10742_5.420_5.48	0.657834	0.591643	0.633829	0.910783	0.999969	0.999885	0.894528	0.884904	0.999995	0.878104	0.916803	0.973343	1	1	1	1	1	1
429.58034_4.828_5.61	0.0369814	0.0369814	0.0369814	0.0233773	1	1	0.0233773	0.0233773	1	0.399953	0.58208	0.909353	1	1	1	0.796501	1	1
315.31600_9.231_5.43	0.668523	0.195799	0.651387	0.920607	0.923814	0.918093	0.601487	0.591173	0.999998	0.87872	0.825638	0.973343	1	1	1	1	1	1
267.01753_4.484_4.55	0.970499	0.0650254	0.35106	0.895221	0.893753	0.54103	0.509638	0.201674	0.914767	0.999651	0.754725	0.973343	1	1	1	1	1	1
426.19703_13.855_6.67	0.207506	0.627149	0.642531	0.601067	0.999999	0.939207	0.591647	0.902682	0.934592	0.597703	0.916803	0.973343	1	1	1	1	1	1
312.09656_9.233_4.07	0.662276	0.182739	0.65456	0.919586	0.912616	0.909872	0.57984	0.575201	1	0.878104	0.816259	0.973343	1	1	1	1	1	1
345.11628_10.507_5.68	0.362191	0.0931447	0.359374	0.559816	0.935924	0.934734	0.25708	0.255484	1	0.726526	0.754725	0.973343	1	1	1	1	1	1
233.10229_8.802_5.51	0.440991	0.376675	0.958402	0.932946	0.930237	0.999784	0.63677	0.904698	0.953656	0.765447	0.907504	0.999886	1	1	1	1	1	1
322.08132_9.541_4.12	0.97698	0.367336	0.980918	0.99998	0.919449	0.920642	0.906105	0.907399	1	0.999651	0.907504	0.999886	1	1	1	1	1	1
539.16490_4.483_7.11	0.571909	0.0133345	0.571909	0.847724	0.448447	0.448447	0.12545	0.12545	1	0.856493	0.407809	0.973343	1	1	1	1	1	1
312.59827_9.044_4.05	0.650565	0.196176	0.640687	0.910664	0.927572	0.924358	0.591178	0.585179	1	0.878104	0.825677	0.973343	1	1	1	1	1	1
159.06562_8.498_5.04	0.425284	0.376169	0.948523	0.923898	0.932776	0.9999	0.624516	0.901119	0.950946	0.758199	0.907504	0.999886	1	1	1	1	1	1
377.07578_9.378_5.77	0.242347	0.211538	0.638367	0.640298	0.938352	0.999917	0.318696	0.603631	0.954664	0.622076	0.834428	0.973343	1	1	1	1	1	1
267.01778_4.636_4.58	0.0303093	0.15396	0.158768	0.0631305	0.999999	0.930655	0.0615427	0.192656	0.926621	0.399953	0.775955	0.973343	1	1	1	1	1	1
453.06532_16.498_6.38	0.152906	0.02992	0.163659	0.195865	0.921033	0.930169	0.0606581	0.064178	0.999992	0.520118	0.58208	0.973343	1	1	1	1	1	1
315.27050_8.498_5.35	0.429031	0.387559	0.95574	0.927532	0.935487	0.999942	0.63667	0.909211	0.950491	0.759269	0.908367	0.999886	1	1	1	1	1	1
265.02202_9.230_4.56	0.240441	0.208198	0.648973	0.644571	0.933066	0.999902	0.313792	0.605864	0.951092	0.620534	0.834428	0.973343	1	1	1	1	1	1
345.05080_4.326_5.78	0.666158	0.191174	0.641645	0.916472	0.923643	0.915345	0.593838	0.579036	0.999995	0.87872	0.821221	0.973343	1	1	1	1	1	1
387.12622_17.871_5.86	0.173532	0.192704	0.54629	0.495089	0.953484	0.999967	0.239363	0.521337	0.941594	0.554312	0.822942	0.973343	1	1	1	1	1	1
392.04020_15.811_5.64	0.212489	0.19186	0.591948	0.57599	0.939878	0.999967	0.273729	0.54927	0.951918	0.601432	0.821748	0.973343	1	1	1	1	1	1
424.06661_15.803_6.15	0.172728	0.188526	0.575499	0.512368	0.942669	0.999981	0.235027	0.53441	0.931688	0.552957	0.818818	0.973343	1	1	1	1	1	1
534.98431_16.508_6.73	0.204559	0.171952	0.54167	0.533706	0.941934	0.999847	0.247924	0.489907	0.96081	0.595961	0.800808	0.973343	1	1	1	1	1	1
307.03287_9.378_4.95	0.442071	0.387545	0.972101	0.937053	0.93099	0.999872	0.64643	0.914429	0.950886	0.766059	0.908367	0.999886	1	1	1	1	1	1
484.61002_9.541_5.07	0.656988	0.179577	0.624345	0.906988	0.920582	0.909093	0.572185	0.552385	0.999987	0.878104	0.808056	0.973343	1	1	1	1	1	1
478.06182_16.501_6.51	0.402975	0.394683	0.95103	0.914952	0.939531	1	0.622253	0.9111	0.942641	0.745435	0.908456	0.999886	1	1	1	1	1	1
419.08622_15.809_6.07	0.189484	0.178699	0.558136	0.524659	0.941469	0.999994	0.241351	0.509887	0.948326	0.576121	0.807184	0.973343	1	1	1	1	1	1
480.05638_15.024_6.38	0.183174	0.176494	0.5437	0.506851	0.944386	0.999999	0.233815	0.49761	0.948641	0.566059	0.805645	0.973343	1	1	1	1	1	1
304.02444_15.799_4.94	0.191521	0.203209	0.601058	0.55451	0.94422	0.999994	0.265252	0.569932	0.936877	0.58	0.829722	0.973343	1	1	1	1	1	1
466.07699_16.494_6.62	0.164536	0.172039	0.515998	0.462881	0.949732	0.999998	0.213372	0.473563	0.94473	0.540584	0.800808	0.973343	1	1	1	1	1	1
638.38563_9.538_7.90	0.637177	0.0239061	0.164207	0.537656	0.893031	0.519881	0.197902	0.0552947	0.902553	0.878104	0.58208	0.973343	1	1	1	1	1	1
554.34842_4.640_7.30	0.935582	0.0620397	0.337891	0.874671	0.894548	0.549586	0.481385	0.189741	0.918996	0.999651	0.754725	0.973343	1	1	1	1	1	1
638.15070_9.539_5.33	0.369841	0.08583	0.374591	0.578975	0.919287	0.921489	0.248964	0.251555	1	0.728676	0.754725	0.973343	1	1	1	1	1	1
554.12940_4.332_7.33	0.618112	0.199547	0.634811	0.896197	0.931763	0.936917	0.575777	0.586049	0.999998	0.877057	0.826204	0.973343	1	1	1	1	1	1
613.65793_24.414_8.38	0.130253	0.130253	0.130253	0.148819	1	1	0.148819	0.148819	1	0.490066	0.754725	0.951086	1	1	1	1	1	1
602.03636_24.142_8.16	0.0775165	0.525845	0.525845	0.315036	1	0.825407	0.315036	0.798154	0.825407	0.424266	0.910803	0.973343	1	1	1	1	1	1
673.24118_24.337_8.98	0.130731	0.130731	0.130731	0.149599	1	1	0.149599	0.149599	1	0.490066	0.754725	0.951086	1	1	1	1	1	1
552.35894_31.423_8.06	0.138693	0.648131	0.664212	0.863052	0.999998	0.503138	0.870074	0.918051	0.512569	0.494741	0.916995	0.973343	1	1	1	1	1	1
574.35997_24.307_7.85	0.129807	0.129807	0.129807	0.148091	1	1	0.148091	0.148091	1	0.490066	0.754725	0.951086	1	1	1	1	1	1
696.43390_24.380_9.19	0.129558	0.129558	0.129558	0.147686	1	1	0.147686	0.147686	1	0.490066	0.754725	0.951086	1	1	1	1	1	1
230.14475_12.251_4.88	0.648938	0.640209	0.645566	1	0.908684	1	0.909906	1	0.911835	0.878104	0.916803	0.973343	1	1	1	1	1	1
676.24245_24.337_8.99	0.129535	0.129535	0.129535	0.147648	1	1	0.147648	0.147648	1	0.490066	0.754725	0.951086	1	1	1	1	1	1
525.17586_4.486_7.21	0.958934	0.064378	0.346436	0.88849	0.894929	0.54506	0.501406	0.198222	0.916066	0.999651	0.754725	0.973343	1	1	1	1	1	1
619.23802_24.435_8.39	0.130597	0.130597	0.130597	0.149379	1	1	0.149379	0.149379	1	0.490066	0.754725	0.951086	1	1	1	1	1	1
678.91583_24.349_9.04	0.129837	0.129837	0.129837	0.148141	1	1	0.148141	0.148141	1	0.490066	0.754725	0.951086	1	1	1	1	1	1
594.78883_24.368_8.16	0.129533	0.129533	0.129533	0.147645	1	1	0.147645	0.147645	1	0.490066	0.754725	0.951086	1	1	1	1	1	1
530.34776_32.678_8.32	0.129608	0.129608	0.129608	1	0.147768	1	0.147768	1	0.147768	0.490066	0.754725	0.951086	1	1	1	1	1	1
261.09695_2.453_5.08	0.680862	0.237634	0.239701	0.662726	1	0.941092	0.660382	0.341019	0.942202	0.87872	0.853946	0.973343	1	1	1	1	1	1
187.09651_3.259_4.21	0.970031	0.410381	0.442277	0.936577	0.999976	0.94053	0.923992	0.664602	0.951426	0.999651	0.910803	0.973343	1	1	1	1	1	1
638.72439_24.245_8.46	0.129566	0.129566	0.129566	0.147699	1	1	0.147699	0.147699	1	0.490066	0.754725	0.951086	1	1	1	1	1	1
562.05722_24.290_7.86	0.131426	0.131426	0.131426	0.150735	1	1	0.150735	0.150735	1	0.490189	0.754725	0.951086	1	1	1	1	1	1
532.32174_24.221_7.74	0.129837	0.129837	0.129837	0.14814	1	1	0.14814	0.14814	1	0.490066	0.754725	0.951086	1	1	1	1	1	1
403.13505_31.127_7.26	0.348585	0.335958	0.340289	0.531859	1	0.999998	0.528076	0.520937	0.999999	0.717686	0.902217	0.973343	1	1	1	1	1	1
389.25748_6.645_6.27	0.129541	0.129541	0.129541	1	1	0.147659	1	0.147659	0.147659	0.490066	0.754725	0.951086	1	1	1	1	1	1
219.06505_8.652_4.65	0.310284	0.320157	0.967746	0.893066	0.89897	0.480552	0.999999	0.875663	0.869133	0.689116	0.89009	0.999886	1	1	1	1	1	1
304.89099_29.092_4.47	0.533809	0.0773788	0.533809	1	0.820703	0.318836	0.820703	0.318836	0.807288	0.83459	0.754725	0.973343	1	1	1	1	1	1
427.30176_34.117_7.44	0.989889	0.989889	0.0369308	0.406399	0.406399	0.999998	1	0.416186	0.416186	0.999651	0.999328	0.909353	1	1	1	1	1	1
227.12575_19.130_4.88	0.370164	0.997679	0.967578	0.924738	0.999989	0.915634	0.914181	0.999993	0.904436	0.728676	0.999328	0.999886	1	1	1	1	1	1
254.21172_26.366_5.82	0.129636	0.129636	0.129636	1	0.147812	1	0.147812	1	0.147812	0.490066	0.754725	0.951086	1	1	1	1	1	1
370.83565_25.617_5.36	0.569515	0.145545	0.737781	0.914668	0.566897	0.467443	0.910058	0.839204	0.998228	0.855543	0.759508	0.977671	1	1	1	1	1	1
399.14060_26.651_6.56	0.129559	0.129559	0.129559	1	0.147688	1	0.147688	1	0.147688	0.490066	0.754725	0.951086	1	1	1	1	1	1
212.07575_18.359_4.37	0.130065	0.130065	0.130065	1	0.148512	1	0.148512	1	0.148512	0.490066	0.754725	0.951086	1	1	1	1	1	1
135.01412_18.377_3.36	0.129846	0.129846	0.129846	1	0.148155	1	0.148155	1	0.148155	0.490066	0.754725	0.951086	1	1	1	1	1	1
194.13920_18.374_4.08	0.129734	0.129734	0.129734	1	0.147972	1	0.147972	1	0.147972	0.490066	0.754725	0.951086	1	1	1	1	1	1
388.32091_28.089_7.19	0.129605	0.129605	0.129605	1	0.147763	1	0.147763	1	0.147763	0.490066	0.754725	0.951086	1	1	1	1	1	1
194.00960_26.538_4.08	0.130877	0.130877	0.130877	1	0.149837	1	0.149837	1	0.149837	0.490066	0.754725	0.951086	1	1	1	1	1	1
209.20148_12.819_5.24	0.129694	0.129694	0.129694	1	0.147907	1	0.147907	1	0.147907	0.490066	0.754725	0.951086	1	1	1	1	1	1
403.32553_12.054_7.09	0.129633	0.129633	0.129633	1	0.147808	1	0.147808	1	0.147808	0.490066	0.754725	0.951086	1	1	1	1	1	1
293.18525_26.419_6.16	0.668817	0.652182	0.663217	1	1	0.920972	0.999998	0.919097	0.924616	0.87872	0.916995	0.973343	1	1	1	1	1	1
136.02165_18.375_3.45	0.129748	0.129748	0.129748	1	0.147996	1	0.147996	1	0.147996	0.490066	0.754725	0.951086	1	1	1	1	1	1
420.28026_31.516_7.18	0.621832	0.640092	0.159167	0.903537	0.531684	0.999998	0.899706	0.896496	0.520679	0.877263	0.916803	0.973343	1	1	1	1	1	1
362.32634_25.319_7.21	0.129733	0.129733	0.129733	1	0.14797	1	0.14797	1	0.14797	0.490066	0.754725	0.951086	1	1	1	1	1	1
194.00970_15.585_4.10	0.129961	0.129961	0.129961	1	0.148342	1	0.148342	1	0.148342	0.490066	0.754725	0.951086	1	1	1	1	1	1
215.17571_6.645_5.11	0.129587	0.129587	0.129587	1	0.147733	1	0.147733	1	0.147733	0.490066	0.754725	0.951086	1	1	1	1	1	1
225.28744_23.941_5.32	0.129572	0.129572	0.129572	1	0.147709	1	0.147709	1	0.147709	0.490066	0.754725	0.951086	1	1	1	1	1	1
449.38509_23.937_8.23	0.131964	0.131964	0.131964	1	0.151615	1	0.151615	1	0.151615	0.490682	0.754725	0.951086	1	1	1	1	1	1
439.05538_16.494_6.20	0.0884284	0.0773196	0.330718	0.23169	0.927089	0.999952	0.0769923	0.213395	0.942262	0.44397	0.754725	0.973343	1	1	1	1	1	1
596.98381_16.503_7.12	0.0909249	0.0850739	0.347055	0.244892	0.930813	0.999994	0.0842617	0.235227	0.938407	0.451259	0.754725	0.973343	1	1	1	1	1	1
337.10496_28.257_6.12	0.919414	0.952009	0.941036	0.999997	0.999671	0.999991	0.999429	1	0.99927	0.999651	0.999328	0.999886	1	1	1	1	1	1
499.10465_30.697_5.56	0.652934	0.661035	0.659921	0.918237	1	1	0.918615	0.920972	1	0.878104	0.916995	0.973343	1	1	1	1	1	1
643.01829_4.641_7.47	0.424516	0.0824936	0.376521	0.62422	0.913219	0.889504	0.272323	0.246715	0.999907	0.757718	0.754725	0.973343	1	1	1	1	1	1
609.37356_24.163_8.21	0.129682	0.129682	0.129682	1	1	0.147887	1	0.147887	0.147887	0.490066	0.754725	0.951086	1	1	1	1	1	1
325.13963_6.805_5.88	0.398559	0.418885	0.901409	0.896366	0.959302	0.999993	0.637739	0.906292	0.952979	0.744154	0.910803	0.999886	1	1	1	1	1	1
571.69415_24.037_7.84	0.0766281	0.495664	0.495664	0.297546	1	0.839873	0.297546	0.761422	0.839873	0.424266	0.910803	0.973343	1	1	1	1	1	1
597.50269_24.387_8.28	0.129558	0.129558	0.129558	0.147686	1	1	0.147686	0.147686	1	0.490066	0.754725	0.951086	1	1	1	1	1	1
587.68968_24.100_8.05	0.0780007	0.54645	0.54645	0.326763	1	0.815241	0.326763	0.821304	0.815241	0.424266	0.911667	0.973343	1	1	1	1	1	1
610.53092_24.176_8.26	0.0782817	0.556438	0.556438	0.332569	1	0.810426	0.332569	0.831957	0.810426	0.424266	0.913819	0.973343	1	1	1	1	1	1
671.58020_24.328_8.95	0.129627	0.129627	0.129627	0.147798	1	1	0.147798	0.147798	1	0.490066	0.754725	0.951086	1	1	1	1	1	1
692.02174_24.075_9.05	0.129612	0.129612	0.129612	0.147774	1	1	0.147774	0.147774	1	0.490066	0.754725	0.951086	1	1	1	1	1	1
617.70704_24.199_8.22	0.0761321	0.452197	0.452197	0.27417	1	0.862396	0.27417	0.702804	0.862396	0.424266	0.910803	0.973343	1	1	1	1	1	1
586.06961_24.347_8.06	0.132189	0.132189	0.132189	0.151984	1	1	0.151984	0.151984	1	0.490716	0.754725	0.951086	1	1	1	1	1	1
643.72433_24.267_8.69	0.129569	0.129569	0.129569	0.147703	1	1	0.147703	0.147703	1	0.490066	0.754725	0.951086	1	1	1	1	1	1
273.09477_4.334_7.25	0.966594	0.0683013	0.337403	0.885949	0.908024	0.553876	0.518157	0.201042	0.908964	0.999651	0.754725	0.973343	1	1	1	1	1	1
566.48986_24.294_7.82	0.129786	0.129786	0.129786	0.148058	1	1	0.148058	0.148058	1	0.490066	0.754725	0.951086	1	1	1	1	1	1
690.75134_24.369_9.13	0.129634	0.129634	0.129634	0.147809	1	1	0.147809	0.147809	1	0.490066	0.754725	0.951086	1	1	1	1	1	1
642.22882_24.261_8.67	0.0771853	0.523673	0.523673	0.31318	1	0.825816	0.31318	0.795621	0.825816	0.424266	0.910803	0.973343	1	1	1	1	1	1
259.11778_10.493_5.09	0.226741	0.218336	0.667164	0.639605	0.933921	0.999998	0.311284	0.629477	0.938917	0.613317	0.839738	0.973343	1	1	1	1	1	1
589.92494_24.359_8.12	0.129677	0.129677	0.129677	0.14788	1	1	0.14788	0.14788	1	0.490066	0.754725	0.951086	1	1	1	1	1	1
307.13908_9.675_5.64	0.233284	0.0263281	0.233284	0.331105	0.841077	0.841077	0.0797712	0.0797712	1	0.616289	0.58208	0.973343	1	1	1	1	1	1
336.16549_17.192_5.77	0.0920297	0.339051	0.343803	0.244845	1	0.94305	0.242149	0.526672	0.941091	0.453716	0.902217	0.973343	1	1	1	1	1	1
600.79299_24.382_8.23	0.130316	0.130316	0.130316	0.148921	1	1	0.148921	0.148921	1	0.490066	0.754725	0.951086	1	1	1	1	1	1
689.26104_24.363_9.11	0.129628	0.129628	0.129628	0.1478	1	1	0.1478	0.1478	1	0.490066	0.754725	0.951086	1	1	1	1	1	1
575.92054_24.326_8.02	0.076478	0.442342	0.442342	0.26981	1	0.868435	0.26981	0.688616	0.868435	0.424266	0.910803	0.973343	1	1	1	1	1	1
327.10488_10.100_5.50	0.0224827	0.129759	0.53829	0.159749	0.905478	0.920668	0.0435508	0.422569	0.569862	0.399953	0.754725	0.973343	1	1	1	1	1	1
343.14756_16.478_5.72	0.175002	0.038335	0.185975	0.234908	0.931012	0.938801	0.0802103	0.0843441	0.999994	0.555097	0.58208	0.973343	1	1	1	1	1	1
584.78075_24.353_8.15	0.129835	0.129835	0.129835	0.148137	1	1	0.148137	0.148137	1	0.490066	0.754725	0.951086	1	1	1	1	1	1
315.31605_9.376_5.41	0.671161	0.198441	0.661774	0.924904	0.922306	0.91918	0.606574	0.600946	1	0.87872	0.826204	0.973343	1	1	1	1	1	1
339.14164_20.926_5.72	0.0775309	0.308679	0.317609	0.206838	0.999999	0.937763	0.202114	0.476858	0.933616	0.424266	0.89009	0.973343	1	1	1	1	1	1
550.33344_24.247_7.65	0.0782165	0.561881	0.561881	0.335237	1	0.807271	0.335237	0.837605	0.807271	0.424266	0.915164	0.973343	1	1	1	1	1	1
499.26266_3.973_7.36	0.565617	0.013313	0.565617	0.841419	0.451936	0.451936	0.123793	0.123793	1	0.8535	0.407809	0.973343	1	1	1	1	1	1
315.37755_9.376_5.41	0.391794	0.0888022	0.382292	0.603309	0.920088	0.915723	0.266199	0.260959	0.999999	0.741054	0.754725	0.973343	1	1	1	1	1	1
660.90349_24.306_8.84	0.0772736	0.529438	0.529438	0.316347	1	0.822856	0.316347	0.802304	0.822856	0.424266	0.910803	0.973343	1	1	1	1	1	1
483.28898_4.332_7.32	0.416196	0.39821	0.978363	0.928817	0.933625	0.999995	0.63539	0.921207	0.94053	0.752931	0.909413	0.999886	1	1	1	1	1	1
395.04872_9.054_5.81	0.681643	0.18341	0.657553	0.926888	0.912111	0.903435	0.592342	0.577946	0.999995	0.87872	0.816754	0.973343	1	1	1	1	1	1
651.22724_24.282_8.75	0.0775684	0.474823	0.474823	0.28881	1	0.853313	0.28881	0.734139	0.853313	0.424266	0.910803	0.973343	1	1	1	1	1	1
262.09716_4.482_3.80	0.552376	0.0131958	0.552376	0.82767	0.45839	0.45839	0.119947	0.119947	1	0.847261	0.407809	0.973343	1	1	1	1	1	1
324.12101_22.425_5.67	0.591877	0.0135087	0.591877	0.866751	0.439002	0.439002	0.131381	0.131381	1	0.863665	0.407809	0.973343	1	1	1	1	1	1
335.06526_4.330_5.46	0.964073	0.0670082	0.339801	0.88646	0.904159	0.55104	0.512694	0.199875	0.911044	0.999651	0.754725	0.973343	1	1	1	1	1	1
159.06571_4.829_3.81	0.34496	0.0728883	0.998413	0.901446	0.551088	0.912638	0.213073	0.549381	0.902516	0.71595	0.754725	0.999886	1	1	1	1	1	1
450.06764_16.500_6.38	0.230701	0.234646	0.669628	0.645738	0.942612	1	0.329969	0.650318	0.94045	0.614283	0.853946	0.973343	1	1	1	1	1	1
187.04408_15.797_3.29	0.0762129	0.0781413	0.334135	0.213299	0.926719	1	0.0695284	0.216589	0.923695	0.424266	0.754725	0.973343	1	1	1	1	1	1
315.61590_9.230_5.43	0.236813	0.196978	0.634992	0.63194	0.929955	0.9998	0.299685	0.582768	0.95292	0.618259	0.826204	0.973343	1	1	1	1	1	1
233.10223_8.500_4.69	0.230434	0.207015	0.649041	0.633072	0.932279	0.99996	0.303895	0.604397	0.946025	0.614283	0.833692	0.973343	1	1	1	1	1	1
406.05587_15.809_6.02	0.178327	0.178042	0.55305	0.506135	0.942582	1	0.230924	0.505737	0.942772	0.559818	0.807184	0.973343	1	1	1	1	1	1
363.06128_4.331_5.61	0.635349	0.2061	0.659138	0.911795	0.928515	0.935878	0.594883	0.609328	0.999995	0.878104	0.83297	0.973343	1	1	1	1	1	1
273.24843_4.331_5.14	0.643446	0.200167	0.660637	0.915198	0.923922	0.929461	0.592132	0.602535	0.999998	0.878104	0.826204	0.973343	1	1	1	1	1	1
275.26704_16.467_5.99	0.19035	0.21153	0.596129	0.549852	0.95029	0.999964	0.271462	0.577427	0.937614	0.578055	0.834428	0.973343	1	1	1	1	1	1
315.61588_9.376_5.41	0.236022	0.198316	0.640775	0.634555	0.929038	0.999831	0.300324	0.58807	0.951057	0.617672	0.826204	0.973343	1	1	1	1	1	1
275.11278_15.798_3.50	0.187584	0.198765	0.601249	0.549284	0.941472	0.999994	0.25768	0.564265	0.934143	0.573239	0.826204	0.973343	1	1	1	1	1	1
449.07427_16.500_4.44	0.159258	0.168843	0.502341	0.44647	0.951689	0.999995	0.205915	0.460224	0.945256	0.53285	0.795637	0.973343	1	1	1	1	1	1
315.27050_8.799_5.33	0.0987968	0.0834882	0.362768	0.266626	0.921303	0.999903	0.0883702	0.241064	0.941109	0.471658	0.754725	0.973343	1	1	1	1	1	1
362.09322_16.493_4.32	0.0756947	0.0823224	0.316505	0.203215	0.94073	0.999989	0.0718965	0.214051	0.9314	0.424266	0.754725	0.973343	1	1	1	1	1	1
457.18942_21.072_6.88	0.0714364	0.0825607	0.315776	0.19568	0.94136	0.999942	0.0690649	0.214037	0.924947	0.424266	0.754725	0.973343	1	1	1	1	1	1
275.53234_9.523_5.21	0.416082	0.401421	0.953671	0.921554	0.941396	0.999997	0.637846	0.915071	0.946652	0.752931	0.909866	0.999886	1	1	1	1	1	1
349.08091_4.825_3.91	0.948815	0.0647482	0.33693	0.879088	0.90105	0.551754	0.49731	0.194326	0.914401	0.999651	0.754725	0.973343	1	1	1	1	1	1
265.02202_9.377_4.55	0.234568	0.203872	0.647291	0.63683	0.930751	0.999911	0.304485	0.599294	0.94863	0.616599	0.830876	0.973343	1	1	1	1	1	1
305.03196_8.497_4.94	0.228469	0.204147	0.659426	0.637018	0.927096	0.999954	0.299423	0.606988	0.942092	0.613317	0.831224	0.973343	1	1	1	1	1	1
390.04495_9.233_5.78	0.240264	0.195303	0.647646	0.643569	0.924684	0.999715	0.300962	0.588244	0.951347	0.620534	0.8246	0.973343	1	1	1	1	1	1
390.04509_9.378_5.83	0.234786	0.202356	0.655299	0.641913	0.927185	0.999894	0.303204	0.602177	0.946604	0.616599	0.828562	0.973343	1	1	1	1	1	1
278.57378_4.824_3.85	0.605295	0.20265	0.615592	0.883108	0.939637	0.942662	0.571858	0.578264	1	0.871424	0.828988	0.973343	1	1	1	1	1	1
407.06344_9.538_4.23	0.233274	0.190603	0.643536	0.633053	0.922589	0.99974	0.290379	0.57941	0.948968	0.616289	0.820381	0.973343	1	1	1	1	1	1
117.05497_9.235_4.65	0.236026	0.195978	0.650874	0.640677	0.924113	0.999795	0.298027	0.591101	0.948418	0.617672	0.825638	0.973343	1	1	1	1	1	1
320.08273_9.542_5.09	0.228139	0.201602	0.6534	0.633002	0.927273	0.99994	0.296693	0.600047	0.943596	0.613317	0.826447	0.973343	1	1	1	1	1	1
304.10773_9.540_4.13	0.241911	0.194202	0.637229	0.639114	0.927291	0.99966	0.301257	0.580433	0.954746	0.622076	0.823291	0.973343	1	1	1	1	1	1
347.04260_9.049_4.18	0.232831	0.185731	0.620784	0.618592	0.92651	0.99964	0.28516	0.558818	0.954613	0.616289	0.818818	0.973343	1	1	1	1	1	1
391.16011_13.856_6.32	0.205607	0.213881	0.643169	0.599025	0.938353	0.999998	0.287842	0.609492	0.933174	0.596629	0.834428	0.973343	1	1	1	1	1	1
605.66224_24.400_8.29	0.129535	0.129535	0.129535	0.147649	1	1	0.147649	0.147649	1	0.490066	0.754725	0.951086	1	1	1	1	1	1
664.24323_24.313_8.89	0.129858	0.129858	0.129858	0.148175	1	1	0.148175	0.148175	1	0.490066	0.754725	0.951086	1	1	1	1	1	1
555.76870_24.270_7.82	0.132887	0.132887	0.132887	0.153128	1	1	0.153128	0.153128	1	0.491301	0.754725	0.951086	1	1	1	1	1	1
627.21015_24.222_8.52	0.129533	0.129533	0.129533	0.147645	1	1	0.147645	0.147645	1	0.490066	0.754725	0.951086	1	1	1	1	1	1
549.91022_24.241_7.63	0.129599	0.129599	0.129599	0.147753	1	1	0.147753	0.147753	1	0.490066	0.754725	0.951086	1	1	1	1	1	1
601.07850_24.383_8.24	0.129683	0.129683	0.129683	0.14789	1	1	0.14789	0.14789	1	0.490066	0.754725	0.951086	1	1	1	1	1	1
604.08189_24.395_8.33	0.12969	0.12969	0.12969	0.147901	1	1	0.147901	0.147901	1	0.490066	0.754725	0.951086	1	1	1	1	1	1
656.90509_24.296_8.82	0.129562	0.129562	0.129562	0.147692	1	1	0.147692	0.147692	1	0.490066	0.754725	0.951086	1	1	1	1	1	1
661.23311_24.305_8.81	0.12955	0.12955	0.12955	0.147672	1	1	0.147672	0.147672	1	0.490066	0.754725	0.951086	1	1	1	1	1	1
589.21089_24.361_8.14	0.0789151	0.574454	0.574454	0.343362	1	0.802055	0.343362	0.850231	0.802055	0.424266	0.916803	0.973343	1	1	1	1	1	1
553.47820_24.271_7.84	0.0764802	0.483687	0.483687	0.291074	1	0.846078	0.291074	0.745931	0.846078	0.424266	0.910803	0.973343	1	1	1	1	1	1
637.73219_24.242_8.56	0.0775429	0.534393	0.534393	0.820774	1	0.319505	0.820774	0.807949	0.319505	0.424266	0.910803	0.973343	1	1	1	1	1	1
603.36080_24.158_8.28	0.0770682	0.519985	0.519985	0.311021	1	0.827565	0.311021	0.791283	0.827565	0.424266	0.910803	0.973343	1	1	1	1	1	1
639.22128_24.251_8.62	0.0768468	0.50812	0.50812	0.304427	1	0.833558	0.304427	0.776983	0.833558	0.424266	0.910803	0.973343	1	1	1	1	1	1
652.57211_24.279_8.63	0.0773157	0.522447	0.522447	0.312838	1	0.826798	0.312838	0.794185	0.826798	0.424266	0.910803	0.973343	1	1	1	1	1	1
559.76716_24.292_7.93	0.0765145	0.488369	0.488369	0.293553	1	0.843601	0.293553	0.752047	0.843601	0.424266	0.910803	0.973343	1	1	1	1	1	1
286.17091_30.812_6.17	0.67335	0.698139	0.211511	0.624713	0.919652	0.999995	0.936717	0.639366	0.927644	0.87872	0.916995	0.973343	1	1	1	1	1	1
553.76733_24.261_7.75	0.12954	0.12954	0.12954	0.147657	1	1	0.147657	0.147657	1	0.490066	0.754725	0.951086	1	1	1	1	1	1
569.34634_24.296_7.86	0.0771107	0.49692	0.49692	0.299236	1	0.840294	0.299236	0.763016	0.840294	0.424266	0.910803	0.973343	1	1	1	1	1	1
387.19323_27.375_6.83	0.551749	0.146292	0.110362	0.396052	0.999472	0.917511	0.457756	0.14397	0.874192	0.847013	0.762496	0.951086	1	1	1	1	1	1
620.21878_24.198_8.37	0.0776707	0.5056	0.5056	0.304925	1	0.836842	0.304925	0.773881	0.836842	0.424266	0.910803	0.973343	1	1	1	1	1	1
569.63094_24.314_7.97	0.0775017	0.538456	0.538456	0.321508	1	0.81844	0.321508	0.81251	0.81844	0.424266	0.910803	0.973343	1	1	1	1	1	1
587.64677_24.351_8.07	0.0761463	0.44719	0.44719	0.271627	1	0.865126	0.271627	0.695635	0.865126	0.424266	0.910803	0.973343	1	1	1	1	1	1
630.39453_24.218_8.45	0.0784175	0.571175	0.571175	0.802641	1	0.340513	0.802641	0.846995	0.340513	0.424266	0.916803	0.973343	1	1	1	1	1	1
566.34549_24.299_7.89	0.037399	0.91425	0.91425	0.373002	1	0.456303	0.373002	0.998648	0.456303	0.399953	0.999328	0.999886	1	1	1	1	1	1
468.23391_3.586_6.99	0.151993	0.0248188	0.622451	0.50981	0.536203	0.909802	0.0531481	0.197087	0.896055	0.518866	0.58208	0.973343	1	1	1	1	1	1
389.14200_9.457_6.20	0.714673	0.171789	0.192034	0.898737	0.99996	0.595	0.879798	0.237165	0.623671	0.882399	0.800808	0.973343	1	1	1	1	1	1
550.47794_24.242_7.65	0.0781541	0.556648	0.556648	0.332387	1	0.81	0.332387	0.832178	0.81	0.424266	0.913819	0.973343	1	1	1	1	1	1
579.19281_24.083_8.01	0.0790429	0.588587	0.588587	0.351	1	0.794586	0.351	0.863718	0.794586	0.424266	0.916803	0.973343	1	1	1	1	1	1
630.18276_23.899_8.52	0.037014	0.939878	0.939878	0.441327	1	0.383082	0.441327	0.999533	0.383082	0.399953	0.999328	0.999886	1	1	1	1	1	1
278.57380_4.483_3.81	0.930568	0.065561	0.322199	0.862521	0.910828	0.564346	0.490394	0.188651	0.91242	0.999651	0.754725	0.973343	1	1	1	1	1	1
555.13337_4.485_7.24	0.653611	0.194171	0.64906	0.914722	0.923395	0.921884	0.590339	0.587585	1	0.878104	0.823291	0.973343	1	1	1	1	1	1
270.58769_4.483_3.81	0.625734	0.183846	0.639806	0.901107	0.918656	0.923441	0.559238	0.567825	0.999999	0.877336	0.817031	0.973343	1	1	1	1	1	1
367.05383_4.825_3.94	0.35977	0.0860784	0.373278	0.569412	0.920265	0.926463	0.243884	0.251271	0.999998	0.72461	0.754725	0.973343	1	1	1	1	1	1
263.02150_3.858_4.61	0.363658	0.0904217	0.383032	0.580719	0.922048	0.930639	0.253374	0.264176	0.999993	0.727377	0.754725	0.973343	1	1	1	1	1	1
420.07156_8.855_6.05	0.376537	0.0800984	0.346787	0.560956	0.923696	0.909277	0.242428	0.226641	0.999973	0.732471	0.754725	0.973343	1	1	1	1	1	1
303.10560_5.152_5.34	0.0943017	0.0832593	0.373107	0.265189	0.916065	0.999961	0.0852098	0.246239	0.931536	0.460761	0.754725	0.973343	1	1	1	1	1	1
426.19714_14.073_6.66	0.220201	0.204952	0.597242	0.588838	0.946324	0.999988	0.292883	0.569784	0.954469	0.607142	0.831474	0.973343	1	1	1	1	1	1
738.07639_9.539_8.22	0.248878	0.189116	0.637176	0.646858	0.923598	0.999336	0.301932	0.573511	0.957856	0.628508	0.818818	0.973343	1	1	1	1	1	1
304.52780_4.482_3.79	0.180168	0.0286314	0.186594	0.240152	0.895589	0.901307	0.0675302	0.0695622	0.999999	0.560501	0.58208	0.973343	1	1	1	1	1	1
384.18652_9.672_6.27	0.224215	0.200269	0.639663	0.619994	0.930726	0.999954	0.291985	0.589961	0.945266	0.611147	0.826204	0.973343	1	1	1	1	1	1
349.14964_8.728_5.98	0.215628	0.206369	0.653656	0.618022	0.930419	0.999997	0.290119	0.606365	0.936307	0.604655	0.833288	0.973343	1	1	1	1	1	1
384.18653_8.854_6.41	0.217541	0.200608	0.641815	0.613198	0.930277	0.999983	0.286434	0.591717	0.940912	0.605741	0.826447	0.973343	1	1	1	1	1	1
552.13399_4.484_7.26	0.108899	0.0821956	0.374554	0.289642	0.913689	0.99954	0.0939328	0.245131	0.947005	0.490066	0.754725	0.973343	1	1	1	1	1	1
229.06863_1.226_4.65	0.0859082	0.0851432	0.338814	0.232091	0.934591	1	0.0808674	0.23083	0.935605	0.439953	0.754725	0.973343	1	1	1	1	1	1
610.22603_24.414_8.42	0.129775	0.129775	0.129775	0.14804	1	1	0.14804	0.14804	1	0.490066	0.754725	0.951086	1	1	1	1	1	1
562.77319_24.276_7.77	0.129776	0.129776	0.129776	0.148041	1	1	0.148041	0.148041	1	0.490066	0.754725	0.951086	1	1	1	1	1	1
607.08368_24.398_8.30	0.129571	0.129571	0.129571	0.147707	1	1	0.147707	0.147707	1	0.490066	0.754725	0.951086	1	1	1	1	1	1
616.54491_24.183_8.21	0.0371602	0.974182	0.974182	0.400012	1	0.425037	0.400012	0.999963	0.425037	0.399953	0.999328	0.999886	1	1	1	1	1	1
283.07891_10.225_5.16	0.0487406	0.0477866	0.307178	0.150578	0.875577	1	0.0347077	0.148718	0.878515	0.424266	0.648978	0.973343	1	1	1	0.954571	1	1
572.05880_24.312_7.90	0.131478	0.131478	0.131478	0.150819	1	1	0.150819	0.150819	1	0.490189	0.754725	0.951086	1	1	1	1	1	1
619.09475_24.427_8.45	0.130682	0.130682	0.130682	0.149518	1	1	0.149518	0.149518	1	0.490066	0.754725	0.951086	1	1	1	1	1	1
679.24179_24.366_9.06	0.129952	0.129952	0.129952	0.148328	1	1	0.148328	0.148328	1	0.490066	0.754725	0.951086	1	1	1	1	1	1
584.92390_24.354_8.12	0.0769005	0.50848	0.50848	0.30473	1	0.833485	0.30473	0.777425	0.833485	0.424266	0.910803	0.973343	1	1	1	1	1	1
603.93790_24.396_8.32	0.129875	0.129875	0.129875	0.148203	1	1	0.148203	0.148203	1	0.490066	0.754725	0.951086	1	1	1	1	1	1
578.49142_24.341_8.09	0.0768272	0.507998	0.507998	0.304321	1	0.833579	0.304321	0.776834	0.833579	0.424266	0.910803	0.973343	1	1	1	1	1	1
595.50093_24.383_8.27	0.130416	0.130416	0.130416	0.149084	1	1	0.149084	0.149084	1	0.490066	0.754725	0.951086	1	1	1	1	1	1
612.88118_24.178_8.33	0.129545	0.129545	0.129545	0.147665	1	1	0.147665	0.147665	1	0.490066	0.754725	0.951086	1	1	1	1	1	1
572.20225_24.327_8.05	0.0772911	0.528831	0.528831	0.316073	1	0.823232	0.316073	0.801606	0.823232	0.424266	0.910803	0.973343	1	1	1	1	1	1
612.80494_24.410_8.37	0.130251	0.130251	0.130251	0.148815	1	1	0.148815	0.148815	1	0.490066	0.754725	0.951086	1	1	1	1	1	1
550.76236_24.265_7.83	0.130521	0.130521	0.130521	0.149256	1	1	0.149256	0.149256	1	0.490066	0.754725	0.951086	1	1	1	1	1	1
572.63455_24.315_7.98	0.13014	0.13014	0.13014	0.148635	1	1	0.148635	0.148635	1	0.490066	0.754725	0.951086	1	1	1	1	1	1
635.71932_24.246_8.57	0.129591	0.129591	0.129591	0.14774	1	1	0.14774	0.14774	1	0.490066	0.754725	0.951086	1	1	1	1	1	1
679.57610_24.360_9.06	0.0763905	0.471977	0.471977	0.284868	1	0.852251	0.284868	0.730295	0.852251	0.424266	0.910803	0.973343	1	1	1	1	1	1
658.56503_24.304_8.84	0.0771922	0.524856	0.524856	0.313805	1	0.825182	0.313805	0.797003	0.825182	0.424266	0.910803	0.973343	1	1	1	1	1	1
565.91295_24.311_7.98	0.129889	0.129889	0.129889	0.148225	1	1	0.148225	0.148225	1	0.490066	0.754725	0.951086	1	1	1	1	1	1
606.51623_24.396_8.26	0.0771674	0.522991	0.522991	0.312789	1	0.826148	0.312789	0.794823	0.826148	0.424266	0.910803	0.973343	1	1	1	1	1	1
646.22802_24.270_8.69	0.0791678	0.591362	0.591362	0.352735	1	0.793366	0.352735	0.86628	0.793366	0.424266	0.916803	0.973343	1	1	1	1	1	1
674.58669_24.333_8.92	0.0770637	0.518357	0.518357	0.310173	1	0.828449	0.310173	0.789351	0.828449	0.424266	0.910803	0.973343	1	1	1	1	1	1
585.06887_24.352_8.11	0.0774912	0.535929	0.535929	0.320181	1	0.819806	0.320181	0.80968	0.819806	0.424266	0.910803	0.973343	1	1	1	1	1	1
700.62609_24.117_9.13	0.0767353	0.502982	0.502982	0.301541	1	0.836114	0.301541	0.770632	0.836114	0.424266	0.910803	0.973343	1	1	1	1	1	1
544.18851_24.225_7.58	0.1298	0.1298	0.1298	0.148081	1	1	0.148081	0.148081	1	0.490066	0.754725	0.951086	1	1	1	1	1	1
544.47273_24.256_7.86	0.129574	0.129574	0.129574	0.147712	1	1	0.147712	0.147712	1	0.490066	0.754725	0.951086	1	1	1	1	1	1
606.37249_24.396_8.29	0.130532	0.130532	0.130532	0.149274	1	1	0.149274	0.149274	1	0.490066	0.754725	0.951086	1	1	1	1	1	1
612.66128_24.413_8.35	0.129538	0.129538	0.129538	0.147654	1	1	0.147654	0.147654	1	0.490066	0.754725	0.951086	1	1	1	1	1	1
599.86499_24.147_8.22	0.13059	0.13059	0.13059	0.149369	1	1	0.149369	0.149369	1	0.490066	0.754725	0.951086	1	1	1	1	1	1
609.87033_24.171_8.32	0.0372187	0.0372187	0.0372187	0.0236003	1	1	0.0236003	0.0236003	1	0.399953	0.58208	0.909353	1	1	1	0.796501	1	1
661.40106_24.303_8.84	0.0766425	0.494607	0.494607	0.297034	1	0.840484	0.297034	0.760075	0.840484	0.424266	0.910803	0.973343	1	1	1	1	1	1
682.81604_24.080_8.98	0.0775567	0.540409	0.540409	0.32264	1	0.817497	0.32264	0.81468	0.817497	0.424266	0.910803	0.973343	1	1	1	1	1	1
664.90175_24.332_8.92	0.0764766	0.486715	0.486715	0.292622	1	0.844417	0.292622	0.749896	0.844417	0.424266	0.910803	0.973343	1	1	1	1	1	1
593.64889_24.366_8.15	0.130557	0.130557	0.130557	0.149314	1	1	0.149314	0.149314	1	0.490066	0.754725	0.951086	1	1	1	1	1	1
575.49220_24.320_7.97	0.0767808	0.502832	0.502832	0.301563	1	0.836302	0.301563	0.770446	0.836302	0.424266	0.910803	0.973343	1	1	1	1	1	1
664.40363_24.321_8.89	0.0765286	0.489039	0.489039	0.293927	1	0.843267	0.293927	0.752916	0.843267	0.424266	0.910803	0.973343	1	1	1	1	1	1
643.05687_24.265_8.63	0.076706	0.492857	0.492857	0.296272	1	0.841586	0.296272	0.757837	0.841586	0.424266	0.910803	0.973343	1	1	1	1	1	1
599.03080_24.142_8.17	0.0137247	0.58123	0.58123	0.129934	1	0.448122	0.129934	0.85679	0.448122	0.316944	0.916803	0.973343	1	1	1	1	1	1
543.47705_24.223_7.57	0.129762	0.129762	0.129762	0.148018	1	1	0.148018	0.148018	1	0.490066	0.754725	0.951086	1	1	1	1	1	1
673.62223_24.013_8.87	0.129902	0.129902	0.129902	0.148247	1	1	0.148247	0.148247	1	0.490066	0.754725	0.951086	1	1	1	1	1	1
560.05704_24.279_7.82	0.129703	0.129703	0.129703	0.147922	1	1	0.147922	0.147922	1	0.490066	0.754725	0.951086	1	1	1	1	1	1
553.33504_24.273_7.84	0.0763048	0.461855	0.461855	0.279488	1	0.857552	0.279488	0.716394	0.857552	0.424266	0.910803	0.973343	1	1	1	1	1	1
671.90465_24.352_8.99	0.0764895	0.476481	0.476481	0.287391	1	0.850024	0.287391	0.736365	0.850024	0.424266	0.910803	0.973343	1	1	1	1	1	1
679.40925_24.361_8.99	0.0782094	0.558436	0.558436	0.333438	1	0.809151	0.333438	0.834043	0.809151	0.424266	0.913819	0.973343	1	1	1	1	1	1
682.08557_24.354_9.05	0.0763156	0.45482	0.45482	0.275896	1	0.861378	0.275896	0.706527	0.861378	0.424266	0.910803	0.973343	1	1	1	1	1	1
556.20024_24.259_7.70	0.0767387	0.500624	0.500624	0.300336	1	0.837414	0.300336	0.767686	0.837414	0.424266	0.910803	0.973343	1	1	1	1	1	1
588.21472_24.350_8.08	0.0766831	0.499978	0.499978	0.299883	1	0.837639	0.299883	0.766875	0.837639	0.424266	0.910803	0.973343	1	1	1	1	1	1
601.20622_24.143_8.18	0.0136703	0.577988	0.577988	0.128821	1	0.449328	0.128821	0.853674	0.449328	0.316944	0.916803	0.973343	1	1	1	1	1	1
532.17823_24.226_7.79	0.129665	0.129665	0.129665	0.147861	1	1	0.147861	0.147861	1	0.490066	0.754725	0.951086	1	1	1	1	1	1
582.49324_24.361_8.23	0.0773447	0.525483	0.525483	0.314467	1	0.825199	0.314467	0.797733	0.825199	0.424266	0.910803	0.973343	1	1	1	1	1	1
661.56732_24.301_8.83	0.129611	0.129611	0.129611	0.147773	1	1	0.147773	0.147773	1	0.490066	0.754725	0.951086	1	1	1	1	1	1
591.35843_24.368_8.20	0.0761804	0.458624	0.458624	0.27757	1	0.859028	0.27757	0.711882	0.859028	0.424266	0.910803	0.973343	1	1	1	1	1	1
659.91008_24.298_8.74	0.0767704	0.504632	0.504632	0.302466	1	0.835292	0.302466	0.772682	0.835292	0.424266	0.910803	0.973343	1	1	1	1	1	1
593.93692_24.364_8.12	0.0771878	0.520287	0.520287	0.311441	1	0.827682	0.311441	0.791639	0.827682	0.424266	0.910803	0.973343	1	1	1	1	1	1
581.06982_24.334_8.00	0.0761979	0.45941	0.45941	0.27801	1	0.858641	0.27801	0.712984	0.858641	0.424266	0.910803	0.973343	1	1	1	1	1	1
582.63610_24.358_8.19	0.0764133	0.482036	0.482036	0.290083	1	0.846826	0.290083	0.743756	0.846826	0.424266	0.910803	0.973343	1	1	1	1	1	1
605.54375_24.154_8.22	0.0784042	0.554443	0.554443	0.331814	1	0.811819	0.331814	0.829859	0.811819	0.424266	0.913587	0.973343	1	1	1	1	1	1
578.92386_24.330_8.00	0.076635	0.476089	0.476089	0.287497	1	0.850562	0.287497	0.73584	0.850562	0.424266	0.910803	0.973343	1	1	1	1	1	1
587.35930_24.350_8.07	0.0775042	0.527212	0.527212	0.315714	1	0.824627	0.315714	0.799738	0.824627	0.424266	0.910803	0.973343	1	1	1	1	1	1
588.92553_24.371_8.23	0.0772368	0.525311	0.525311	0.314138	1	0.825038	0.314138	0.797533	0.825038	0.424266	0.910803	0.973343	1	1	1	1	1	1
544.90001_24.253_7.82	0.0767457	0.491403	0.491403	0.295609	1	0.842471	0.295609	0.75597	0.842471	0.424266	0.910803	0.973343	1	1	1	1	1	1
657.06553_24.306_8.83	0.0770761	0.518148	0.518148	0.310092	1	0.828593	0.310092	0.789102	0.828593	0.424266	0.910803	0.973343	1	1	1	1	1	1
676.07582_24.337_8.99	0.0769384	0.513625	0.513625	0.30746	1	0.830752	0.30746	0.783682	0.830752	0.424266	0.910803	0.973343	1	1	1	1	1	1
624.21398_24.214_8.45	0.0761204	0.449905	0.449905	0.272969	1	0.863608	0.272969	0.699533	0.863608	0.424266	0.910803	0.973343	1	1	1	1	1	1
637.89668_24.239_8.48	0.0371114	0.975842	0.975842	0.400563	1	0.423972	0.400563	0.99997	0.423972	0.399953	0.999328	0.999886	1	1	1	1	1	1
579.03126_24.064_7.90	0.078229	0.554651	0.554651	0.811281	1	0.331524	0.811281	0.830079	0.331524	0.424266	0.913587	0.973343	1	1	1	1	1	1
599.93919_24.383_8.23	0.0771295	0.50583	0.50583	0.303866	1	0.83547	0.303866	0.774164	0.83547	0.424266	0.910803	0.973343	1	1	1	1	1	1
600.08259_24.380_8.21	0.0770016	0.516874	0.516874	0.309272	1	0.829117	0.309272	0.787583	0.829117	0.424266	0.910803	0.973343	1	1	1	1	1	1
600.22625_24.381_8.20	0.0766317	0.496518	0.496518	0.297993	1	0.839414	0.297993	0.762506	0.839414	0.424266	0.910803	0.973343	1	1	1	1	1	1
575.63572_24.315_7.94	0.0773891	0.527467	0.527467	0.315588	1	0.824215	0.315588	0.800033	0.824215	0.424266	0.910803	0.973343	1	1	1	1	1	1
591.69339_24.121_8.11	0.0770939	0.504019	0.504019	0.302855	1	0.836378	0.302855	0.771922	0.836378	0.424266	0.910803	0.973343	1	1	1	1	1	1
538.32501_24.244_7.82	0.0778284	0.535416	0.535416	0.320672	1	0.820893	0.320672	0.809103	0.820893	0.424266	0.910803	0.973343	1	1	1	1	1	1
547.18811_24.253_7.77	0.0762022	0.455205	0.455205	0.275859	1	0.860925	0.275859	0.70707	0.860925	0.424266	0.910803	0.973343	1	1	1	1	1	1
547.33291_24.251_7.75	0.0772048	0.526425	0.526425	0.314641	1	0.824349	0.314641	0.798827	0.824349	0.424266	0.910803	0.973343	1	1	1	1	1	1
549.62255_24.243_7.66	0.077007	0.513698	0.513698	0.307649	1	0.830873	0.307649	0.78377	0.830873	0.424266	0.910803	0.973343	1	1	1	1	1	1
553.62233_24.266_7.79	0.0776274	0.54108	0.54108	0.323146	1	0.817298	0.323146	0.815423	0.817298	0.424266	0.910803	0.973343	1	1	1	1	1	1
562.20198_24.280_7.79	0.0764663	0.467858	0.467858	0.28291	1	0.854655	0.28291	0.72468	0.854655	0.424266	0.910803	0.973343	1	1	1	1	1	1
689.75434_24.368_9.13	0.0768619	0.507393	0.507393	0.304086	1	0.833992	0.304086	0.776091	0.833992	0.424266	0.910803	0.973343	1	1	1	1	1	1
718.23624_24.156_9.29	0.0768265	0.507798	0.507798	0.304216	1	0.833687	0.304216	0.776588	0.833687	0.424266	0.910803	0.973343	1	1	1	1	1	1
563.48285_24.307_8.00	0.0263592	0.230991	0.230991	0.079145	1	0.843358	0.079145	0.326883	0.843358	0.399953	0.85253	0.973343	1	1	1	1	1	1
617.54137_24.189_8.36	0.0370265	0.962623	0.962623	0.393854	1	0.430057	0.393854	0.999888	0.430057	0.399953	0.999328	0.999886	1	1	1	1	1	1
572.34585_24.324_8.04	0.076865	0.508874	0.508874	0.304855	1	0.833187	0.304855	0.777908	0.833187	0.424266	0.910803	0.973343	1	1	1	1	1	1
672.23806_24.345_8.99	0.0786389	0.575281	0.575281	0.343153	1	0.800922	0.343153	0.851041	0.800922	0.424266	0.916803	0.973343	1	1	1	1	1	1
544.61425_24.258_7.86	0.0768664	0.468813	0.468813	0.284239	1	0.85502	0.284239	0.725987	0.85502	0.424266	0.910803	0.973343	1	1	1	1	1	1
550.90420_24.273_7.90	0.0775769	0.538474	0.538474	0.321687	1	0.818611	0.321687	0.81253	0.818611	0.424266	0.910803	0.973343	1	1	1	1	1	1
555.91123_24.261_7.70	0.0761776	0.455373	0.455373	0.275895	1	0.86078	0.275895	0.707308	0.86078	0.424266	0.910803	0.973343	1	1	1	1	1	1
568.49170_24.297_7.86	0.076782	0.505019	0.505019	0.30269	1	0.835106	0.30269	0.773162	0.835106	0.424266	0.910803	0.973343	1	1	1	1	1	1
576.20419_24.344_8.16	0.0762338	0.46531	0.46531	0.281115	1	0.855523	0.281115	0.721178	0.855523	0.424266	0.910803	0.973343	1	1	1	1	1	1
578.77932_24.334_8.04	0.077668	0.53023	0.53023	0.317636	1	0.823359	0.317636	0.803212	0.823359	0.424266	0.910803	0.973343	1	1	1	1	1	1
627.55586_24.222_8.51	0.0763844	0.475395	0.475395	0.286611	1	0.850379	0.286611	0.734908	0.850379	0.424266	0.910803	0.973343	1	1	1	1	1	1
699.83698_24.092_9.13	0.0764782	0.485066	0.485066	0.291778	1	0.845321	0.291778	0.74774	0.845321	0.424266	0.910803	0.973343	1	1	1	1	1	1
557.19359_24.288_7.92	0.0773769	0.525699	0.525699	0.31465	1	0.825157	0.31465	0.797984	0.825157	0.424266	0.910803	0.973343	1	1	1	1	1	1
538.46739_24.240_7.82	0.129573	0.129573	0.129573	0.147711	1	1	0.147711	0.147711	1	0.490066	0.754725	0.951086	1	1	1	1	1	1
551.18860_24.270_7.88	0.0764166	0.481002	0.481002	0.289559	1	0.847398	0.289559	0.742388	0.847398	0.424266	0.910803	0.973343	1	1	1	1	1	1
559.91291_24.282_7.83	0.0765146	0.488323	0.488323	0.293529	1	0.843626	0.293529	0.751987	0.843626	0.424266	0.910803	0.973343	1	1	1	1	1	1
566.20086_24.302_7.92	0.0784453	0.572813	0.572813	0.341426	1	0.801806	0.341426	0.848617	0.801806	0.424266	0.916803	0.973343	1	1	1	1	1	1
574.78090_24.315_7.92	0.0774747	0.53375	0.53375	0.31902	1	0.820965	0.31902	0.807222	0.820965	0.424266	0.910803	0.973343	1	1	1	1	1	1
581.35782_24.333_7.98	0.129699	0.129699	0.129699	0.147916	1	1	0.147916	0.147916	1	0.490066	0.754725	0.951086	1	1	1	1	1	1
657.56397_24.316_8.86	0.0767861	0.505336	0.505336	0.302862	1	0.834942	0.302862	0.773554	0.834942	0.424266	0.910803	0.973343	1	1	1	1	1	1
569.91463_24.325_8.08	0.0763042	0.462753	0.462753	0.279949	1	0.857064	0.279949	0.717641	0.857064	0.424266	0.910803	0.973343	1	1	1	1	1	1
674.74739_24.337_8.88	0.0779453	0.553588	0.553588	0.330328	1	0.811179	0.330328	0.828956	0.811179	0.424266	0.913587	0.973343	1	1	1	1	1	1
674.91173_24.337_8.87	0.0771439	0.518573	0.518573	0.310461	1	0.828519	0.310461	0.789608	0.828519	0.424266	0.910803	0.973343	1	1	1	1	1	1
682.24984_24.353_9.05	0.0768991	0.506193	0.506193	0.30355	1	0.834736	0.30355	0.774613	0.834736	0.424266	0.910803	0.973343	1	1	1	1	1	1
562.48928_24.276_7.76	0.0764197	0.482319	0.482319	0.290242	1	0.846687	0.290242	0.744129	0.846687	0.424266	0.910803	0.973343	1	1	1	1	1	1
652.23928_24.279_8.71	0.0292401	0.286302	0.286302	0.102366	1	0.81208	0.102366	0.42848	0.81208	0.399953	0.877688	0.973343	1	1	1	1	1	1
638.78933_23.938_8.60	0.129533	0.129533	0.129533	1	1	0.147645	1	0.147645	0.147645	0.490066	0.754725	0.951086	1	1	1	1	1	1
622.88918_24.199_8.40	0.0136092	0.600097	0.600097	0.134027	1	0.435567	0.134027	0.874154	0.435567	0.316944	0.916803	0.973343	1	1	1	1	1	1
554.50183_24.030_8.01	0.0778175	0.551172	0.551172	0.8122	1	0.328788	0.8122	0.826387	0.328788	0.424266	0.91191	0.973343	1	1	1	1	1	1
563.34139_24.300_7.94	0.0761209	0.448118	0.448118	0.272052	1	0.864572	0.272052	0.69697	0.864572	0.424266	0.910803	0.973343	1	1	1	1	1	1
568.77884_24.295_7.84	0.0775957	0.540695	0.540695	0.322876	1	0.817434	0.322876	0.814997	0.817434	0.424266	0.910803	0.973343	1	1	1	1	1	1
572.49042_24.317_7.99	0.0766395	0.458966	0.458966	0.278698	1	0.859843	0.278698	0.712362	0.859843	0.424266	0.910803	0.973343	1	1	1	1	1	1
576.06208_24.340_8.12	0.0769967	0.514273	0.514273	0.307922	1	0.830533	0.307922	0.784463	0.830533	0.424266	0.910803	0.973343	1	1	1	1	1	1
593.79291_24.364_8.14	0.0762831	0.470564	0.470564	0.283916	1	0.85278	0.283916	0.728375	0.85278	0.424266	0.910803	0.973343	1	1	1	1	1	1
654.06333_24.285_8.77	0.0770756	0.51538	0.51538	0.308666	1	0.830111	0.308666	0.785794	0.830111	0.424266	0.910803	0.973343	1	1	1	1	1	1
654.22944_24.284_8.76	0.0768603	0.502944	0.502944	0.301794	1	0.836425	0.301794	0.770586	0.836425	0.424266	0.910803	0.973343	1	1	1	1	1	1
660.06998_24.309_8.80	0.0765994	0.494209	0.494209	0.296736	1	0.840603	0.296736	0.759567	0.840603	0.424266	0.910803	0.973343	1	1	1	1	1	1
664.56656_24.334_8.85	0.0770653	0.5198	0.5198	0.310919	1	0.82766	0.310919	0.791063	0.82766	0.424266	0.910803	0.973343	1	1	1	1	1	1
664.73341_24.332_8.88	0.0775478	0.540798	0.540798	0.322821	1	0.817261	0.322821	0.815111	0.817261	0.424266	0.910803	0.973343	1	1	1	1	1	1
667.40879_24.321_8.81	0.0766607	0.497556	0.497556	0.298589	1	0.838913	0.298589	0.763822	0.838913	0.424266	0.910803	0.973343	1	1	1	1	1	1
667.57384_24.323_8.90	0.0764563	0.470361	0.470361	0.284176	1	0.853275	0.284176	0.7281	0.853275	0.424266	0.910803	0.973343	1	1	1	1	1	1
672.07110_24.349_8.99	0.0776448	0.544582	0.544582	0.324993	1	0.815412	0.324993	0.81927	0.815412	0.424266	0.911667	0.973343	1	1	1	1	1	1
682.41646_24.352_9.04	0.0764419	0.481427	0.481427	0.289831	1	0.847224	0.289831	0.74295	0.847224	0.424266	0.910803	0.973343	1	1	1	1	1	1
568.63535_24.296_7.84	0.0261387	0.219782	0.219782	0.0753636	1	0.852349	0.0753636	0.30628	0.852349	0.399953	0.842338	0.973343	1	1	1	1	1	1
621.87754_24.210_8.41	0.0371658	0.99658	0.99658	0.414118	1	0.410803	0.414118	1	0.410803	0.399953	0.999328	0.999886	1	1	1	1	1	1
544.75651_24.255_7.85	0.0775867	0.53531	0.53531	0.320076	1	0.820374	0.320076	0.808984	0.820374	0.424266	0.910803	0.973343	1	1	1	1	1	1
549.76676_24.242_7.64	0.0775724	0.521554	0.521554	0.312946	1	0.827892	0.312946	0.793135	0.827892	0.424266	0.910803	0.973343	1	1	1	1	1	1
574.92509_24.315_7.92	0.0777988	0.548811	0.548811	0.327526	1	0.813455	0.327526	0.823855	0.813455	0.424266	0.911667	0.973343	1	1	1	1	1	1
576.34700_24.340_8.11	0.0764621	0.481438	0.481438	0.28988	1	0.847263	0.28988	0.742965	0.847263	0.424266	0.910803	0.973343	1	1	1	1	1	1
581.21413_24.331_7.98	0.0772549	0.519063	0.519063	0.310959	1	0.828512	0.310959	0.79019	0.828512	0.424266	0.910803	0.973343	1	1	1	1	1	1
587.50363_24.350_8.07	0.076538	0.480775	0.480775	0.289701	1	0.847796	0.289701	0.742087	0.847796	0.424266	0.910803	0.973343	1	1	1	1	1	1
649.72870_24.286_8.71	0.0770509	0.513333	0.513333	0.307558	1	0.831176	0.307558	0.78333	0.831176	0.424266	0.910803	0.973343	1	1	1	1	1	1
649.89224_24.301_8.75	0.0775136	0.534054	0.534054	0.319264	1	0.820891	0.319264	0.807565	0.820891	0.424266	0.910803	0.973343	1	1	1	1	1	1
652.73285_24.288_8.61	0.0767078	0.492238	0.492238	0.295957	1	0.841929	0.295957	0.757043	0.841929	0.424266	0.910803	0.973343	1	1	1	1	1	1
657.22945_24.316_8.81	0.0767413	0.502761	0.502761	0.30144	1	0.836249	0.30144	0.770357	0.836249	0.424266	0.910803	0.973343	1	1	1	1	1	1
657.39567_24.317_8.78	0.0768539	0.496667	0.496667	0.29855	1	0.839844	0.29855	0.762695	0.839844	0.424266	0.910803	0.973343	1	1	1	1	1	1
659.57724_24.297_8.79	0.0781012	0.536929	0.536929	0.322065	1	0.820711	0.322065	0.810802	0.820711	0.424266	0.910803	0.973343	1	1	1	1	1	1
551.04625_24.275_7.91	0.0267827	0.216866	0.216866	0.0756991	1	0.858744	0.0756991	0.300932	0.858744	0.399953	0.839252	0.973343	1	1	1	1	1	1
557.33580_24.295_7.98	0.0270904	0.244422	0.244422	0.0846741	1	0.835598	0.0846741	0.351626	0.835598	0.399953	0.854104	0.973343	1	1	1	1	1	1
563.76793_24.304_7.99	0.0266291	0.237826	0.237826	0.0817389	1	0.838764	0.0817389	0.339471	0.838764	0.399953	0.853946	0.973343	1	1	1	1	1	1
629.21565_24.230_8.56	0.076879	0.510672	0.510672	0.30581	1	0.832233	0.30581	0.780103	0.832233	0.424266	0.910803	0.973343	1	1	1	1	1	1
576.35148_24.090_8.07	0.0771556	0.521612	0.521612	0.826878	1	0.312052	0.826878	0.793203	0.312052	0.424266	0.910803	0.973343	1	1	1	1	1	1
579.35424_24.090_8.06	0.0373362	0.998241	0.998241	0.414165	1	0.412459	0.414165	1	0.412459	0.399953	0.999328	0.999886	1	1	1	1	1	1
624.87874_24.210_8.41	0.013486	0.566076	0.566076	0.124856	1	0.454007	0.124856	0.841884	0.454007	0.316944	0.915164	0.973343	1	1	1	1	1	1
602.86581_24.146_8.21	0.0770251	0.511009	0.511009	0.306305	1	0.83239	0.306305	0.780513	0.83239	0.424266	0.910803	0.973343	1	1	1	1	1	1
642.39070_24.269_8.61	0.076778	0.501021	0.501021	0.300625	1	0.837288	0.300625	0.768183	0.837288	0.424266	0.910803	0.973343	1	1	1	1	1	1
645.39612_24.271_8.60	0.0773045	0.512384	0.512384	0.307626	1	0.832289	0.307626	0.782181	0.832289	0.424266	0.910803	0.973343	1	1	1	1	1	1
556.05609_24.261_7.71	0.0273678	0.254833	0.254833	0.0884348	1	0.828015	0.0884348	0.370808	0.828015	0.399953	0.862534	0.973343	1	1	1	1	1	1
646.72588_24.267_8.69	0.037312	0.915055	0.915055	0.372963	1	0.455438	0.372963	0.998685	0.455438	0.399953	0.999328	0.999886	1	1	1	1	1	1
650.05823_24.303_8.80	0.0778872	0.553728	0.553728	0.330267	1	0.810961	0.330267	0.829103	0.810961	0.424266	0.913587	0.973343	1	1	1	1	1	1
675.07923_24.335_8.96	0.0768524	0.508505	0.508505	0.304637	1	0.83336	0.304637	0.777455	0.83336	0.424266	0.910803	0.973343	1	1	1	1	1	1
635.05286_24.252_8.58	0.0270322	0.248105	0.248105	0.0856782	1	0.83196	0.0856782	0.358415	0.83196	0.399953	0.858299	0.973343	1	1	1	1	1	1
569.77278_24.324_8.06	0.0376909	0.855006	0.855006	0.347348	1	0.488662	0.347348	0.993512	0.488662	0.399953	0.987805	0.999886	1	1	1	1	1	1
557.47841_24.288_7.93	0.0138529	0.594007	0.594007	0.133877	1	0.442287	0.133877	0.868694	0.442287	0.316944	0.916803	0.973343	1	1	1	1	1	1
562.34551_24.278_7.77	0.0260436	0.22355	0.22355	0.0763051	1	0.848304	0.0763051	0.313198	0.848304	0.399953	0.847045	0.973343	1	1	1	1	1	1
563.62481_24.313_8.06	0.037711	0.83629	0.83629	0.33907	1	0.498749	0.33907	0.99069	0.498749	0.399953	0.98177	0.999886	1	1	1	1	1	1
570.05746_24.325_8.05	0.0133398	0.530415	0.530415	0.11546	1	0.474125	0.11546	0.803424	0.474125	0.316944	0.910803	0.973343	1	1	1	1	1	1
660.23634_24.306_8.83	0.0136919	0.621511	0.621511	0.139981	1	0.424474	0.139981	0.892268	0.424474	0.316944	0.916803	0.973343	1	1	1	1	1	1
569.34438_24.082_8.13	0.0369333	0.970106	0.970106	0.396947	1	0.425885	0.396947	0.999943	0.425885	0.399953	0.999328	0.999886	1	1	1	1	1	1
580.68720_24.073_7.99	0.0774817	0.537784	0.537784	0.321117	1	0.818762	0.321117	0.811759	0.818762	0.424266	0.910803	0.973343	1	1	1	1	1	1
586.69147_24.110_8.10	0.0372183	0.953928	0.953928	0.435359	1	0.390678	0.435359	0.99979	0.390678	0.399953	0.999328	0.999886	1	1	1	1	1	1
632.21653_24.230_8.50	0.0374125	0.971419	0.971419	0.399934	1	0.42768	0.399934	0.99995	0.42768	0.399953	0.999328	0.999886	1	1	1	1	1	1
639.55423_24.248_8.62	0.0371514	0.94146	0.94146	0.384488	1	0.441246	0.384488	0.999569	0.441246	0.399953	0.999328	0.999886	1	1	1	1	1	1
650.22581_24.295_8.70	0.0374145	0.897665	0.897665	0.365438	1	0.464894	0.365438	0.997706	0.464894	0.399953	0.999328	0.999886	1	1	1	1	1	1
642.55383_24.280_8.65	0.0138235	0.56815	0.56815	0.127212	1	0.457263	0.127212	0.843975	0.457263	0.316944	0.916121	0.973343	1	1	1	1	1	1
620.37719_24.217_8.42	0.0137651	0.58355	0.58355	0.130741	1	0.44728	0.130741	0.858997	0.44728	0.316944	0.916803	0.973343	1	1	1	1	1	1
667.74146_24.319_8.89	0.0136647	0.583062	0.583062	0.130057	1	0.446242	0.130057	0.858535	0.446242	0.316944	0.916803	0.973343	1	1	1	1	1	1
635.21654_24.265_8.61	0.0371493	0.915414	0.915414	0.372357	1	0.454403	0.372357	0.998702	0.454403	0.399953	0.999328	0.999886	1	1	1	1	1	1
642.72075_24.284_8.73	0.036989	0.948996	0.948996	0.387238	1	0.436636	0.387238	0.999715	0.436636	0.399953	0.999328	0.999886	1	1	1	1	1	1
639.38824_24.250_8.58	0.0137571	0.566222	0.566222	0.126372	1	0.45755	0.126372	0.842031	0.45755	0.316944	0.915164	0.973343	1	1	1	1	1	1
628.21314_24.241_8.50	0.0134833	0.56511	0.56511	0.124604	1	0.454555	0.124604	0.840905	0.454555	0.316944	0.915164	0.973343	1	1	1	1	1	1
602.69992_24.146_8.21	0.0136542	0.609366	0.609366	0.136643	1	0.430844	0.136643	0.882201	0.430844	0.316944	0.916803	0.973343	1	1	1	1	1	1
393.04321_9.539_5.81	0.689962	0.685067	0.691272	1	0.938141	1	0.937766	1	0.939536	0.879109	0.916995	0.973343	1	1	1	1	1	1
355.07006_32.905_5.82	0.0701218	0.42904	0.411978	0.241552	0.999996	0.861617	0.25004	0.655975	0.87112	0.424266	0.910803	0.973343	1	1	1	1	1	1
446.44467_30.688_5.37	0.165999	0.625399	0.621191	0.910183	1	0.533232	0.908632	0.8937	0.530675	0.542537	0.916803	0.973343	1	1	1	1	1	1
307.03296_4.826_5.02	0.683348	0.678888	0.617334	0.913765	0.999912	1	0.934017	0.912218	0.999892	0.87872	0.916995	0.973343	1	1	1	1	1	1
306.24296_21.072_6.36	0.976176	0.976176	0.036943	0.42295	0.42295	0.999971	1	0.399888	0.399888	0.999651	0.999328	0.909353	1	1	1	1	1	1
327.10505_13.237_5.51	0.0459292	0.00446233	0.0424689	0.0304288	0.882818	0.871277	0.00608381	0.00571879	0.999992	0.424266	0.260917	0.951086	1	1	1	0.796501	1	1
357.34013_15.805_5.75	0.0823978	0.0782221	0.330254	0.221634	0.928687	0.999997	0.0736968	0.214675	0.934702	0.433605	0.754725	0.973343	1	1	1	1	1	1
357.40565_15.804_5.75	0.0838276	0.0796015	0.335889	0.227057	0.928098	0.999997	0.0756	0.219992	0.934122	0.437816	0.754725	0.973343	1	1	1	1	1	1
293.12365_8.802_5.50	0.0990366	0.0825122	0.363275	0.267307	0.919579	0.999876	0.0877793	0.23964	0.941172	0.472287	0.754725	0.973343	1	1	1	1	1	1
338.18100_8.801_5.83	0.0929066	0.0822282	0.360745	0.255868	0.920341	0.999963	0.0835169	0.237786	0.935053	0.456495	0.754725	0.973343	1	1	1	1	1	1
357.59376_16.494_5.77	0.0849183	0.0795806	0.325719	0.223272	0.932814	0.999995	0.0763097	0.214537	0.940047	0.438987	0.754725	0.973343	1	1	1	1	1	1
275.30950_16.489_5.21	0.0784117	0.0835651	0.33816	0.219176	0.932741	0.999995	0.074598	0.227858	0.925212	0.424266	0.754725	0.973343	1	1	1	1	1	1
577.01805_24.078_8.02	0.0773119	0.531018	0.531018	0.317247	1	0.822078	0.317247	0.804114	0.822078	0.424266	0.910803	0.973343	1	1	1	1	1	1
600.87564_24.134_8.15	0.076575	0.481767	0.481767	0.29029	1	0.847339	0.29029	0.7434	0.847339	0.424266	0.910803	0.973343	1	1	1	1	1	1
608.54402_24.162_8.19	0.0132661	0.551047	0.551047	0.120007	1	0.460179	0.120007	0.826253	0.460179	0.316944	0.91191	0.973343	1	1	1	1	1	1
617.20793_24.193_8.40	0.013506	0.587558	0.587558	0.130286	1	0.441489	0.130286	0.862762	0.441489	0.316944	0.916803	0.973343	1	1	1	1	1	1
564.18815_24.010_7.76	0.0776803	0.545955	0.545955	0.325782	1	0.814742	0.325782	0.820766	0.814742	0.424266	0.911667	0.973343	1	1	1	1	1	1
586.36850_24.088_8.00	0.0369334	0.972054	0.972054	0.424926	1	0.397875	0.424926	0.999953	0.397875	0.399953	0.999328	0.999886	1	1	1	1	1	1
593.86868_24.126_8.12	0.0372961	0.889827	0.889827	0.468321	1	0.361301	0.468321	0.99714	0.361301	0.399953	0.999328	0.999886	1	1	1	1	1	1
638.15057_9.235_7.98	0.253684	0.18578	0.63314	0.649664	0.922428	0.999031	0.302442	0.566455	0.960808	0.633558	0.818818	0.973343	1	1	1	1	1	1
117.05502_9.381_4.65	0.239475	0.201651	0.649128	0.643567	0.92867	0.999835	0.306561	0.597524	0.950584	0.620534	0.826447	0.973343	1	1	1	1	1	1
492.59659_9.541_5.06	0.240381	0.191449	0.622021	0.628053	0.930242	0.999624	0.297213	0.567401	0.957766	0.620534	0.821597	0.973343	1	1	1	1	1	1
258.13390_8.082_4.96	0.178839	0.172637	0.183909	0.236581	0.999993	0.999999	0.226541	0.230954	0.999999	0.56012	0.80176	0.973343	1	1	1	1	1	1
275.11282_9.541_4.14	0.231215	0.200167	0.625065	0.619347	0.935196	0.999904	0.297984	0.580881	0.952752	0.614283	0.826204	0.973343	1	1	1	1	1	1
215.09157_5.372_4.49	0.0318113	0.151732	0.177615	0.071618	0.999894	0.937468	0.0628433	0.206381	0.916411	0.399953	0.775239	0.973343	1	1	1	1	1	1
[truncated: 3,680 more rows]
