# Supplementary material for: A dynamic rhizosphere interplay between tree roots and soil bacteria under drought stress
Source: eLife. 2022 Jul 20;11:e79679. doi: 10.7554/eLife.79679 (PMC9385208; doi:10.7554/eLife.79679)
Supplement: Figure 5—source data 1. [file elife-79679-fig5-data1.xlsx]

## Sheet: Legend
Source Data6: Leaf and soil elements respond to drought and bacterial inoculation
(A) Statistical results of leaves phosphorus (P)
(B) Statistical results of Fe
(C) Statistical results of Zn
(D) Statistical results of Mn
(E) Statistical results of soil phosphorus (P)

## Sheet: (A)
(A) P
ANOVATwoWay_Repeated-Measures
Mauchly's Test of Sphericity
	Mauchly's W	Approx. Chi-Square	DF	Prob>ChiSq	Greenhouse-Geisser Epsilon	Huynh-Feldt Epsilon	Lower-bound Epsilon
P	0.60971	1.84162	5	0.8706	0.82162	1	0.33333
Days	0.07496	9.64341	5	0.08599	0.47664	0.61431	0.33333
P * Days	1.08736e-63	260.425	44	0	0.30108	0.69174	0.11111
Tests of Within-Subjects Effects
		Sum of Squares	DF	Mean Square	F	Prob>F
P	Sphericity Assumed	0.25612	3	0.08537	1.14329	0.36364
P	Greenhouse-Geisser	0.25612	2.46487	0.10391	1.14329	0.36118
P	Huynh-Feldt	0.25612	3	0.08537	1.14329	0.36364
P	Lower-bound	0.25612	1	0.25612	1.14329	0.33384
Error(P)	Sphericity Assumed	1.1201	15	0.07467
Error(P)	Greenhouse-Geisser	1.1201	12.3243	0.09088
Error(P)	Huynh-Feldt	1.1201	15	0.07467
Error(P)	Lower-bound	1.1201	5	0.22402
Days	Sphericity Assumed	1.27829	3	0.4261	2.04955	0.15012
Days	Greenhouse-Geisser	1.27829	1.42991	0.89397	2.04955	0.19813
Days	Huynh-Feldt	1.27829	1.84294	0.69362	2.04955	0.18455
Days	Lower-bound	1.27829	1	1.27829	2.04955	0.21167
Error(Days)	Sphericity Assumed	3.11847	15	0.2079
Error(Days)	Greenhouse-Geisser	3.11847	7.14954	0.43618
Error(Days)	Huynh-Feldt	3.11847	9.21468	0.33842
Error(Days)	Lower-bound	3.11847	5	0.62369
P * Days	Sphericity Assumed	9.54247	9	1.06027	3.592	0.00194
P * Days	Greenhouse-Geisser	9.54247	2.70973	3.52156	3.592	0.04542
P * Days	Huynh-Feldt	9.54247	6.22564	1.53277	3.592	0.00751
P * Days	Lower-bound	9.54247	1	9.54247	3.592	0.11657
Error(P * Days)	Sphericity Assumed	13.283	45	0.29518
Error(P * Days)	Greenhouse-Geisser	13.283	13.5487	0.98039
Error(P * Days)	Huynh-Feldt	13.283	31.1282	0.42672
Error(P * Days)	Lower-bound	13.283	5	2.65659
Tests of Between-Subjects Effects
	Sum of Squares	DF	Mean Square	F	Prob>F
Intercept	0.07762	1	0.07762	0.86094	0.39606
Error	0.4508	5	0.09016
P
Descriptive Statistics
	Mean	Std. Error	95.00% LCL	95.00% UCL
P Drought with bacteria	0.01242	0.07571	-0.18221	0.20705
P Drought withoout bacteria	-0.00259	0.05821	-0.15222	0.14704
P Irrigated with bacteria	-0.00651	0.04045	-0.1105	0.09747
P Irrigated without bacteria	-0.11706	0.0483	-0.24123	0.00711
Pairwise Comparison
Bonferroni Test
	Index	Mean Difference	Std. Error	DF	|t|value	Prob>|t|	Alpha	Sig Flag	95.00% LCL	95.00% UCL
P Drought with bacteria P Drought withoout bacteria	0	0.01501	0.13953	15	0.10756	1	0.05	0	-0.40864	0.43866
P Drought with bacteria P Irrigated with bacteria	1	0.01893	0.13953	15	0.13568	1	0.05	0	-0.40472	0.44258
P Drought with bacteria P Irrigated without bacteria	2	0.12948	0.13953	15	0.92795	1	0.05	0	-0.29417	0.55313
P Drought withoout bacteria P Irrigated with bacteria	3	0.00392	0.13953	15	0.02812	1	0.05	0	-0.41973	0.42757
P Drought withoout bacteria P Irrigated without bacteria	4	0.11447	0.13953	15	0.82039	1	0.05	0	-0.30918	0.53812
P Irrigated with bacteria P Irrigated without bacteria	5	0.11054	0.13953	15	0.79227	1	0.05	0	-0.31311	0.53419
Days
Descriptive Statistics
	Mean	Std. Error	95.00% LCL	95.00% UCL
20.5	-0.09602	0.07254	-0.28249	0.09045
27.5	0.1665	0.0959	-0.08001	0.41301
3.6	-0.12806	0.11493	-0.42349	0.16736
10.6	-0.05616	0.04558	-0.17333	0.06102
Pairwise Comparison
Bonferroni Test
	Index	Mean Difference	Std. Error	DF	|t|value	Prob>|t|	Alpha	Sig Flag	95.00% LCL	95.00% UCL
20.5 27.5	0	-0.26252	0.13953	15	1.88149	0.47675	0.05	0	-0.68617	0.16113
20.5 3.6	1	0.03204	0.13953	15	0.22964	1	0.05	0	-0.39161	0.45569
20.5 10.6	2	-0.03986	0.13953	15	0.28569	1	0.05	0	-0.46351	0.38379
27.5 3.6	3	0.29456	0.13953	15	2.11112	0.31173	0.05	0	-0.12909	0.71821
27.5 10.6	4	0.22266	0.13953	15	1.5958	0.78829	0.05	0	-0.20099	0.64631
3.6 10.6	5	-0.0719	0.13953	15	0.51532	1	0.05	0	-0.49555	0.35175
P * Days
Descriptive Statistics
		Mean	Std. Error	95.00% LCL	95.00% UCL
P Drought with bacteria	20.5	-0.08657	0.09642	-0.33443	0.1613
P Drought with bacteria	27.5	0.12453	0.26635	-0.56015	0.80921
P Drought with bacteria	3.6	0.03594	0.33479	-0.82467	0.89654
P Drought with bacteria	10.6	-0.02423	0.08192	-0.23481	0.18636
P Drought withoout bacteria	20.5	0.01709	0.23352	-0.58318	0.61736
P Drought withoout bacteria	27.5	-0.47865	0.20461	-1.00463	0.04733
P Drought withoout bacteria	3.6	0.4947	0.23351	-0.10556	1.09495
P Drought withoout bacteria	10.6	-0.04349	0.03187	-0.12542	0.03843
P Irrigated with bacteria	20.5	-0.12087	0.10121	-0.38103	0.13929
P Irrigated with bacteria	27.5	0.39794	0.26875	-0.2929	1.08877
P Irrigated with bacteria	3.6	-0.20247	0.25514	-0.85833	0.45339
P Irrigated with bacteria	10.6	-0.10065	0.09824	-0.35318	0.15188
P Irrigated without bacteria	20.5	-0.19374	0.0521	-0.32765	-0.05982
P Irrigated without bacteria	27.5	0.62219	0.13924	0.26425	0.98012
P Irrigated without bacteria	3.6	-0.84041	0.24979	-1.48252	-0.19829
P Irrigated without bacteria	10.6	-0.05627	0.07992	-0.2617	0.14916
Pairwise Comparison
Bonferroni Test
Days within P = P Drought with bacteria
	Index	Mean Difference	Std. Error	DF	|t|value	Prob>|t|	Alpha	Sig Flag	95.00% LCL	95.00% UCL
20.5 27.5	0	-0.2111	0.27906	45	0.75647	1	0.05	0	-1.27482	0.85262
20.5 3.6	1	-0.1225	0.27906	45	0.43899	1	0.05	0	-1.18622	0.94122
20.5 10.6	2	-0.06234	0.27906	45	0.2234	1	0.05	0	-1.12606	1.00138
27.5 3.6	3	0.08859	0.27906	45	0.31748	1	0.05	0	-0.97513	1.15231
27.5 10.6	4	0.14876	0.27906	45	0.53307	1	0.05	0	-0.91496	1.21248
3.6 10.6	5	0.06016	0.27906	45	0.21559	1	0.05	0	-1.00356	1.12388
Days within P = P Drought withoout bacteria
	Index	Mean Difference	Std. Error	DF	|t|value	Prob>|t|	Alpha	Sig Flag	95.00% LCL	95.00% UCL
20.5 27.5	0	0.49574	0.27906	45	1.77647	1	0.05	0	-0.56798	1.55946
20.5 3.6	1	-0.47761	0.27906	45	1.71149	1	0.05	0	-1.54133	0.58612
20.5 10.6	2	0.06059	0.27906	45	0.21711	1	0.05	0	-1.00313	1.12431
27.5 3.6	3	-0.97334	0.27906	45	3.48796	0.13197	0.05	0	-2.03706	0.09038
27.5 10.6	4	-0.43515	0.27906	45	1.55937	1	0.05	0	-1.49887	0.62857
3.6 10.6	5	0.53819	0.27906	45	1.9286	1	0.05	0	-0.52553	1.60191
Days within P = P Irrigated with bacteria
	Index	Mean Difference	Std. Error	DF	|t|value	Prob>|t|	Alpha	Sig Flag	95.00% LCL	95.00% UCL
20.5 27.5	0	-0.51881	0.27906	45	1.85913	1	0.05	0	-1.58253	0.54491
20.5 3.6	1	0.0816	0.27906	45	0.29241	1	0.05	0	-0.98212	1.14532
20.5 10.6	2	-0.02022	0.27906	45	0.07247	1	0.05	0	-1.08394	1.0435
27.5 3.6	3	0.60041	0.27906	45	2.15154	1	0.05	0	-0.46331	1.66413
27.5 10.6	4	0.49858	0.27906	45	1.78666	1	0.05	0	-0.56514	1.5623
3.6 10.6	5	-0.10182	0.27906	45	0.36488	1	0.05	0	-1.16554	0.9619
Days within P = P Irrigated without bacteria
	Index	Mean Difference	Std. Error	DF	|t|value	Prob>|t|	Alpha	Sig Flag	95.00% LCL	95.00% UCL
20.5 27.5	0	-0.81593	0.27906	45	2.92385	0.6475	0.05	0	-1.87965	0.2478
20.5 3.6	1	0.64667	0.27906	45	2.31733	1	0.05	0	-0.41705	1.71039
20.5 10.6	2	-0.13747	0.27906	45	0.49261	1	0.05	0	-1.20119	0.92625
27.5 3.6	3	1.4626	0.27906	45	5.24119	0.000492517	0.05	1	0.39888	2.52632
27.5 10.6	4	0.67846	0.27906	45	2.43124	1	0.05	0	-0.38526	1.74218
3.6 10.6	5	-0.78414	0.27906	45	2.80995	0.87705	0.05	0	-1.84786	0.27958
P within Days = 20.5
	Index	Mean Difference	Std. Error	DF	|t|value	Prob>|t|	Alpha	Sig Flag	95.00% LCL	95.00% UCL
P Drought with bacteria P Drought withoout bacteria	0	-0.10366	0.27906	45	0.37146	1	0.05	0	-1.16738	0.96006
P Drought with bacteria P Irrigated with bacteria	1	0.0343	0.27906	45	0.12292	1	0.05	0	-1.02942	1.09802
P Drought with bacteria P Irrigated without bacteria	2	0.10717	0.27906	45	0.38404	1	0.05	0	-0.95655	1.17089
P Drought withoout bacteria P Irrigated with bacteria	3	0.13796	0.27906	45	0.49438	1	0.05	0	-0.92576	1.20168
P Drought withoout bacteria P Irrigated without bacteria	4	0.21083	0.27906	45	0.7555	1	0.05	0	-0.85289	1.27455
P Irrigated with bacteria P Irrigated without bacteria	5	0.07287	0.27906	45	0.26112	1	0.05	0	-0.99085	1.13659
P within Days = 27.5
	Index	Mean Difference	Std. Error	DF	|t|value	Prob>|t|	Alpha	Sig Flag	95.00% LCL	95.00% UCL
P Drought with bacteria P Drought withoout bacteria	0	0.60318	0.27906	45	2.16148	0.0232	0.05	0	-0.46054	1.6669
P Drought with bacteria P Irrigated with bacteria	1	-0.2734	0.27906	45	0.97974	1	0.05	0	-1.33712	0.79032
P Drought with bacteria P Irrigated without bacteria	2	-0.49766	0.27906	45	1.78334	1	0.05	0	-1.56138	0.56606
P Drought withoout bacteria P Irrigated with bacteria	3	-0.87658	0.27906	45	3.14122	0.35665	0.05	0	-1.9403	0.18714
P Drought withoout bacteria P Irrigated without bacteria	4	-1.10084	0.27906	45	3.94482	0.03322	0.05	1	-2.16456	-0.03712
P Irrigated with bacteria P Irrigated without bacteria	5	-0.22425	0.27906	45	0.8036	1	0.05	0	-1.28797	0.83947
P within Days = 3.6
	Index	Mean Difference	Std. Error	DF	|t|value	Prob>|t|	Alpha	Sig Flag	95.00% LCL	95.00% UCL
P Drought with bacteria P Drought withoout bacteria	0	-0.45876	0.27906	45	1.64395	1	0.05	0	-1.52248	0.60496
P Drought with bacteria P Irrigated with bacteria	1	0.23841	0.27906	45	0.85433	1	0.05	0	-0.82531	1.30213
P Drought with bacteria P Irrigated without bacteria	2	0.87635	0.27906	45	3.14037	0.3575	0.05	0	-0.18737	1.94007
P Drought withoout bacteria P Irrigated with bacteria	3	0.69717	0.27906	45	2.49828	1	0.05	0	-0.36655	1.76089
P Drought withoout bacteria P Irrigated without bacteria	4	1.3351	0.27906	45	4.78432	0.00226	0.05	1	0.27138	2.39883
P Irrigated with bacteria P Irrigated without bacteria	5	0.63794	0.27906	45	2.28604	1	0.05	0	-0.42578	1.70166
P within Days = 10.6
	Index	Mean Difference	Std. Error	DF	|t|value	Prob>|t|	Alpha	Sig Flag	95.00% LCL	95.00% UCL
P Drought with bacteria P Drought withoout bacteria	0	0.01927	0.27906	45	0.06905	1	0.05	0	-1.04445	1.08299
P Drought with bacteria P Irrigated with bacteria	1	0.07642	0.27906	45	0.27385	1	0.05	0	-0.9873	1.14014
P Drought with bacteria P Irrigated without bacteria	2	0.03204	0.27906	45	0.11483	1	0.05	0	-1.03168	1.09576
P Drought withoout bacteria P Irrigated with bacteria	3	0.05715	0.27906	45	0.2048	1	0.05	0	-1.00657	1.12087
P Drought withoout bacteria P Irrigated without bacteria	4	0.01278	0.27906	45	0.04578	1	0.05	0	-1.05094	1.0765
P Irrigated with bacteria P Irrigated without bacteria	5	-0.04438	0.27906	45	0.15902	1	0.05	0	-1.1081	1.01934

## Sheet: (B)
(B) Fe
ANOVATwoWay_Repeated-Measures
Mauchly's Test of Sphericity
	Mauchly's W	Approx. Chi-Square	DF	Prob>ChiSq	Greenhouse-Geisser Epsilon	Huynh-Feldt Epsilon	Lower-bound Epsilon
Fe	0.43823	3.07089	5	0.68906	0.65189	1	0.33333
Days	0.07771	9.50927	5	0.0904	0.58615	0.87928	0.33333
Fe * Days	5.11527e-62	253.508	44	0	0.32024	0.80236	0.11111
Tests of Within-Subjects Effects
		Sum of Squares	DF	Mean Square	F	Prob>F
Fe	Sphericity Assumed	0.18834	3	0.06278	0.46943	0.70803
Fe	Greenhouse-Geisser	0.18834	1.95567	0.09631	0.46943	0.63466
Fe	Huynh-Feldt	0.18834	3	0.06278	0.46943	0.70803
Fe	Lower-bound	0.18834	1	0.18834	0.46943	0.52372
Error(Fe)	Sphericity Assumed	2.00608	15	0.13374
Error(Fe)	Greenhouse-Geisser	2.00608	9.77837	0.20516
Error(Fe)	Huynh-Feldt	2.00608	15	0.13374
Error(Fe)	Lower-bound	2.00608	5	0.40122
Days	Sphericity Assumed	52.8624	3	17.6208	31.8709	9.44579e-07
Days	Greenhouse-Geisser	52.8624	1.75845	30.0619	31.8709	0.000118303
Days	Huynh-Feldt	52.8624	2.63785	20.04	31.8709	3.83026e-06
Days	Lower-bound	52.8624	1	52.8624	31.8709	0.00242
Error(Days)	Sphericity Assumed	8.2932	15	0.55288
Error(Days)	Greenhouse-Geisser	8.2932	8.79226	0.94324
Error(Days)	Huynh-Feldt	8.2932	13.1892	0.62879
Error(Days)	Lower-bound	8.2932	5	1.65864
Fe * Days	Sphericity Assumed	6.1506	9	0.6834	0.72079	0.68724
Fe * Days	Greenhouse-Geisser	6.1506	2.8822	2.13399	0.72079	0.55049
Fe * Days	Huynh-Feldt	6.1506	7.22126	0.85173	0.72079	0.65904
Fe * Days	Lower-bound	6.1506	1	6.1506	0.72079	0.43464
Error(Fe * Days)	Sphericity Assumed	42.6657	45	0.94813
Error(Fe * Days)	Greenhouse-Geisser	42.6657	14.411	2.96064
Error(Fe * Days)	Huynh-Feldt	42.6657	36.1063	1.18167
Error(Fe * Days)	Lower-bound	42.6657	5	8.53315
Tests of Between-Subjects Effects
	Sum of Squares	DF	Mean Square	F	Prob>F
Intercept	1.02946	1	1.02946	21.1666	0.00584
Error	0.24318	5	0.04864
Fe
Descriptive Statistics
	Mean	Std. Error	95.00% LCL	95.00% UCL
Fe Drought with bacteria	-0.03775	0.06566	-0.20653	0.13104
Fe Drought withoout bacteria	-0.14408	0.06573	-0.31304	0.02488
Fe Irrigated with bacteria	-0.14408	0.09186	-0.3802	0.09205
Fe Irrigated without bacteria	-0.08831	0.04092	-0.1935	0.01687
Pairwise Comparison
Bonferroni Test
	Index	Mean Difference	Std. Error	DF	|t|value	Prob>|t|	Alpha	Sig Flag	95.00% LCL	95.00% UCL
Fe Drought with bacteria Fe Drought withoout bacteria	0	0.10634	0.24259	15	0.43834	1	0.05	0	-0.63024	0.84291
Fe Drought with bacteria Fe Irrigated with bacteria	1	0.10633	0.24259	15	0.43831	1	0.05	0	-0.63024	0.8429
Fe Drought with bacteria Fe Irrigated without bacteria	2	0.05057	0.24259	15	0.20845	1	0.05	0	-0.68601	0.78714
Fe Drought withoout bacteria Fe Irrigated with bacteria	3	-5.53265e-06	0.24259	15	2.28066e-05	1	0.05	0	-0.73658	0.73657
Fe Drought withoout bacteria Fe Irrigated without bacteria	4	-0.05577	0.24259	15	0.22989	1	0.05	0	-0.79234	0.6808
Fe Irrigated with bacteria Fe Irrigated without bacteria	5	-0.05576	0.24259	15	0.22987	1	0.05	0	-0.79234	0.68081
Days
Descriptive Statistics
	Mean	Std. Error	95.00% LCL	95.00% UCL
20.5	-0.33849	0.12328	-0.6554	-0.02159
27.5	-1.21489	0.07014	-1.3952	-1.03458
3.6	0.51423	0.17668	0.06005	0.96841
10.6	0.62493	0.14071	0.26321	0.98665
Pairwise Comparison
Bonferroni Test
	Index	Mean Difference	Std. Error	DF	|t|value	Prob>|t|	Alpha	Sig Flag	95.00% LCL	95.00% UCL
20.5 27.5	0	0.87639	0.24259	15	3.61265	0.01535	0.05	1	0.13982	1.61297
20.5 3.6	1	-0.85272	0.24259	15	3.51508	0.01875	0.05	1	-1.5893	-0.11615
20.5 10.6	2	-0.96342	0.24259	15	3.97139	0.00737	0.05	1	-1.69999	-0.22685
27.5 3.6	3	-1.72912	0.24259	15	7.12773	2.0772e-05	0.05	1	-2.46569	-0.99255
27.5 10.6	4	-1.83981	0.24259	15	7.58404	9.90923e-06	0.05	1	-2.57639	-1.10324
3.6 10.6	5	-0.1107	0.24259	15	0.4563	1	0.05	0	-0.84727	0.62588
Fe * Days
Descriptive Statistics
		Mean	Std. Error	95.00% LCL	95.00% UCL
Fe Drought with bacteria	20.5	-0.30018	0.37966	-1.27612	0.67575
Fe Drought with bacteria	27.5	-1.07913	0.31624	-1.89205	-0.26622
Fe Drought with bacteria	3.6	0.25591	0.36242	-0.67571	1.18753
Fe Drought with bacteria	10.6	0.97242	0.32757	0.13037	1.81447
Fe Drought withoout bacteria	20.5	-0.35519	0.27164	-1.05346	0.34308
Fe Drought withoout bacteria	27.5	-1.63999	0.40518	-2.68154	-0.59844
Fe Drought withoout bacteria	3.6	0.87143	0.35824	-0.04946	1.79232
Fe Drought withoout bacteria	10.6	0.54742	0.2468	-0.087	1.18184
Fe Irrigated with bacteria	20.5	-0.28316	0.26964	-0.97628	0.40996
Fe Irrigated with bacteria	27.5	-0.90805	0.22836	-1.49505	-0.32104
Fe Irrigated with bacteria	3.6	0.03303	0.39994	-0.99505	1.06111
Fe Irrigated with bacteria	10.6	0.58187	0.29783	-0.18374	1.34747
Fe Irrigated without bacteria	20.5	-0.41544	0.28754	-1.15458	0.3237
Fe Irrigated without bacteria	27.5	-1.23237	0.42322	-2.3203	-0.14445
Fe Irrigated without bacteria	3.6	0.89656	0.44015	-0.23489	2.02801
Fe Irrigated without bacteria	10.6	0.398	0.18594	-0.07996	0.87596
Pairwise Comparison
Bonferroni Test
Days within Fe = Fe Drought with bacteria
	Index	Mean Difference	Std. Error	DF	|t|value	Prob>|t|	Alpha	Sig Flag	95.00% LCL	95.00% UCL
20.5 27.5	0	0.77895	0.48518	45	1.60548	1	0.05	0	-1.07047	2.62837
20.5 3.6	1	-0.55609	0.48518	45	1.14616	1	0.05	0	-2.40551	1.29333
20.5 10.6	2	-1.2726	0.48518	45	2.62295	1	0.05	0	-3.12203	0.57682
27.5 3.6	3	-1.33504	0.48518	45	2.75164	1	0.05	0	-3.18446	0.51438
27.5 10.6	4	-2.05155	0.48518	45	4.22843	0.01365	0.05	1	-3.90098	-0.20213
3.6 10.6	5	-0.71651	0.48518	45	1.47679	1	0.05	0	-2.56593	1.13291
Days within Fe = Fe Drought withoout bacteria
	Index	Mean Difference	Std. Error	DF	|t|value	Prob>|t|	Alpha	Sig Flag	95.00% LCL	95.00% UCL
20.5 27.5	0	1.2848	0.48518	45	2.64809	1	0.05	0	-0.56462	3.13422
20.5 3.6	1	-1.22662	0.48518	45	2.52818	1	0.05	0	-3.07604	0.6228
20.5 10.6	2	-0.90261	0.48518	45	1.86037	1	0.05	0	-2.75203	0.94681
27.5 3.6	3	-2.51142	0.48518	45	5.17626	0.000612481	0.05	1	-4.36084	-0.662
27.5 10.6	4	-2.18741	0.48518	45	4.50845	0.00556	0.05	1	-4.03683	-0.33799
3.6 10.6	5	0.32401	0.48518	45	0.66781	1	0.05	0	-1.52541	2.17343
Days within Fe = Fe Irrigated with bacteria
	Index	Mean Difference	Std. Error	DF	|t|value	Prob>|t|	Alpha	Sig Flag	95.00% LCL	95.00% UCL
20.5 27.5	0	0.62489	0.48518	45	1.28795	1	0.05	0	-1.22453	2.47431
20.5 3.6	1	-0.31619	0.48518	45	0.65169	1	0.05	0	-2.16561	1.53323
20.5 10.6	2	-0.86503	0.48518	45	1.7829	1	0.05	0	-2.71445	0.98439
27.5 3.6	3	-0.94108	0.48518	45	1.93964	1	0.05	0	-2.7905	0.90835
27.5 10.6	4	-1.48992	0.48518	45	3.07085	0.43364	0.05	0	-3.33934	0.35951
3.6 10.6	5	-0.54884	0.48518	45	1.13121	1	0.05	0	-2.39826	1.30058
Days within Fe = Fe Irrigated without bacteria
	Index	Mean Difference	Std. Error	DF	|t|value	Prob>|t|	Alpha	Sig Flag	95.00% LCL	95.00% UCL
20.5 27.5	0	0.81694	0.48518	45	1.68378	1	0.05	0	-1.03248	2.66636
20.5 3.6	1	-1.312	0.48518	45	2.70414	1	0.05	0	-3.16142	0.53743
20.5 10.6	2	-0.81343	0.48518	45	1.67656	1	0.05	0	-2.66286	1.03599
27.5 3.6	3	-2.12893	0.48518	45	4.38792	0.0082	0.05	1	-3.97835	-0.27951
27.5 10.6	4	-1.63037	0.48518	45	3.36034	0.19138	0.05	0	-3.47979	0.21905
3.6 10.6	5	0.49856	0.48518	45	1.02758	1	0.05	0	-1.35086	2.34798
Fe within Days = 20.5
	Index	Mean Difference	Std. Error	DF	|t|value	Prob>|t|	Alpha	Sig Flag	95.00% LCL	95.00% UCL
Fe Drought with bacteria Fe Drought withoout bacteria	0	0.05501	0.48518	45	0.11338	1	0.05	0	-1.79441	1.90443
Fe Drought with bacteria Fe Irrigated with bacteria	1	-0.01703	0.48518	45	0.03509	1	0.05	0	-1.86645	1.8324
Fe Drought with bacteria Fe Irrigated without bacteria	2	0.11525	0.48518	45	0.23755	1	0.05	0	-1.73417	1.96467
Fe Drought withoout bacteria Fe Irrigated with bacteria	3	-0.07203	0.48518	45	0.14847	1	0.05	0	-1.92146	1.77739
Fe Drought withoout bacteria Fe Irrigated without bacteria	4	0.06025	0.48518	45	0.12417	1	0.05	0	-1.78918	1.90967
Fe Irrigated with bacteria Fe Irrigated without bacteria	5	0.13228	0.48518	45	0.27264	1	0.05	0	-1.71714	1.9817
Fe within Days = 27.5
	Index	Mean Difference	Std. Error	DF	|t|value	Prob>|t|	Alpha	Sig Flag	95.00% LCL	95.00% UCL
Fe Drought with bacteria Fe Drought withoout bacteria	0	0.56086	0.48518	45	1.15598	0.0421	0.05	0	-1.28856	2.41028
Fe Drought with bacteria Fe Irrigated with bacteria	1	-0.17109	0.48518	45	0.35262	1	0.05	0	-2.02051	1.67834
Fe Drought with bacteria Fe Irrigated without bacteria	2	0.15324	0.48518	45	0.31584	1	0.05	0	-1.69618	2.00266
Fe Drought withoout bacteria Fe Irrigated with bacteria	3	-0.73194	0.48518	45	1.5086	1	0.05	0	-2.58137	1.11748
Fe Drought withoout bacteria Fe Irrigated without bacteria	4	-0.40762	0.48518	45	0.84014	1	0.05	0	-2.25704	1.4418
Fe Irrigated with bacteria Fe Irrigated without bacteria	5	0.32433	0.48518	45	0.66847	1	0.05	0	-1.5251	2.17375
Fe within Days = 3.6
	Index	Mean Difference	Std. Error	DF	|t|value	Prob>|t|	Alpha	Sig Flag	95.00% LCL	95.00% UCL
Fe Drought with bacteria Fe Drought withoout bacteria	0	-0.61552	0.48518	45	1.26864	1	0.05	0	-2.46494	1.2339
Fe Drought with bacteria Fe Irrigated with bacteria	1	0.22288	0.48518	45	0.45938	1	0.05	0	-1.62654	2.0723
Fe Drought with bacteria Fe Irrigated without bacteria	2	-0.64065	0.48518	45	1.32044	1	0.05	0	-2.49007	1.20877
Fe Drought withoout bacteria Fe Irrigated with bacteria	3	0.8384	0.48518	45	1.72802	1	0.05	0	-1.01102	2.68782
Fe Drought withoout bacteria Fe Irrigated without bacteria	4	-0.02513	0.48518	45	0.05179	1	0.05	0	-1.87455	1.82429
Fe Irrigated with bacteria Fe Irrigated without bacteria	5	-0.86353	0.48518	45	1.77981	1	0.05	0	-2.71295	0.98589
Fe within Days = 10.6
	Index	Mean Difference	Std. Error	DF	|t|value	Prob>|t|	Alpha	Sig Flag	95.00% LCL	95.00% UCL
Fe Drought with bacteria Fe Drought withoout bacteria	0	0.425	0.48518	45	0.87596	1	0.05	0	-1.42442	2.27442
Fe Drought with bacteria Fe Irrigated with bacteria	1	0.39055	0.48518	45	0.80496	1	0.05	0	-1.45887	2.23997
Fe Drought with bacteria Fe Irrigated without bacteria	2	0.57442	0.48518	45	1.18394	1	0.05	0	-1.275	2.42384
Fe Drought withoout bacteria Fe Irrigated with bacteria	3	-0.03445	0.48518	45	0.071	1	0.05	0	-1.88387	1.81497
Fe Drought withoout bacteria Fe Irrigated without bacteria	4	0.14942	0.48518	45	0.30798	1	0.05	0	-1.7	1.99885
Fe Irrigated with bacteria Fe Irrigated without bacteria	5	0.18387	0.48518	45	0.37897	1	0.05	0	-1.66555	2.03329

## Sheet: (C)
(C) Zn
ANOVATwoWay_Repeated-Measures
Mauchly's Test of Sphericity
	Mauchly's W	Approx. Chi-Square	DF	Prob>ChiSq	Greenhouse-Geisser Epsilon	Huynh-Feldt Epsilon	Lower-bound Epsilon
Zn	0	0	0	0	0.39968	0.66464	0.33333
Days	0	0	0	0	0.41259	0.74922	0.33333
Zn * Days	3.29091e-105	-289.587	44	0	0.1425	0.28612	0.11111
Tests of Within-Subjects Effects
		Sum of Squares	DF	Mean Square	F	Prob>F
Zn	Sphericity Assumed	1.97939	3	0.6598	3.22754	0.10331
Zn	Greenhouse-Geisser	1.97939	1.19903	1.65083	3.22754	0.19787
Zn	Huynh-Feldt	1.97939	1.99393	0.99271	3.22754	0.1467
Zn	Lower-bound	1.97939	1	1.97939	3.22754	0.21425
Error(Zn)	Sphericity Assumed	1.22657	6	0.20443
Error(Zn)	Greenhouse-Geisser	1.22657	2.39806	0.51148
Error(Zn)	Huynh-Feldt	1.22657	3.98786	0.30757
Error(Zn)	Lower-bound	1.22657	2	0.61328
Days	Sphericity Assumed	0.88424	3	0.29475	0.76974	0.55158
Days	Greenhouse-Geisser	0.88424	1.23776	0.71439	0.76974	0.48741
Days	Huynh-Feldt	0.88424	2.24767	0.3934	0.76974	0.52994
Days	Lower-bound	0.88424	1	0.88424	0.76974	0.47283
Error(Days)	Sphericity Assumed	2.29751	6	0.38292
Error(Days)	Greenhouse-Geisser	2.29751	2.47551	0.92809
Error(Days)	Huynh-Feldt	2.29751	4.49534	0.51109
Error(Days)	Lower-bound	2.29751	2	1.14876
Zn * Days	Sphericity Assumed	3.82892	9	0.42544	1.74653	0.15007
Zn * Days	Greenhouse-Geisser	3.82892	1.28252	2.98547	1.74653	0.30787
Zn * Days	Huynh-Feldt	3.82892	2.57505	1.48693	1.74653	0.26822
Zn * Days	Lower-bound	3.82892	1	3.82892	1.74653	0.31723
Error(Zn * Days)	Sphericity Assumed	4.38461	18	0.24359
Error(Zn * Days)	Greenhouse-Geisser	4.38461	2.56504	1.70937
Error(Zn * Days)	Huynh-Feldt	4.38461	5.15011	0.85136
Error(Zn * Days)	Lower-bound	4.38461	2	2.1923
Tests of Between-Subjects Effects
	Sum of Squares	DF	Mean Square	F	Prob>F
Intercept	6.98066	1	6.98066	7.10122	0.11668
Error	1.96605	2	0.98302
Zn
Descriptive Statistics
	Mean	Std. Error	95.00% LCL	95.00% UCL
Zn Drought with bacteria	0.22749	0.15246	-0.42849	0.88347
Zn Drought withoout bacteria	0.16065	0.22904	-0.82484	1.14615
Zn Irrigated with bacteria	0.67451	0.15871	-0.00836	1.35738
Zn Irrigated without bacteria	0.46276	0.17925	-0.30851	1.23403
Pairwise Comparison
Bonferroni Test
	Index	Mean Difference	Std. Error	DF	|t|value	Prob>|t|	Alpha	Sig Flag	95.00% LCL	95.00% UCL
Zn Drought with bacteria Zn Drought withoout bacteria	0	0.06684	0.20961	6	0.31885	1	0.05	0	-0.74289	0.87656
Zn Drought with bacteria Zn Irrigated with bacteria	1	-0.44702	0.20961	6	2.13261	0.46159	0.05	0	-1.25675	0.36271
Zn Drought with bacteria Zn Irrigated without bacteria	2	-0.23527	0.20961	6	1.12241	1	0.05	0	-1.045	0.57446
Zn Drought withoout bacteria Zn Irrigated with bacteria	3	-0.51385	0.20961	6	2.45146	0.29815	0.05	0	-1.32358	0.29587
Zn Drought withoout bacteria Zn Irrigated without bacteria	4	-0.30211	0.20961	6	1.44126	1	0.05	0	-1.11183	0.50762
Zn Irrigated with bacteria Zn Irrigated without bacteria	5	0.21175	0.20961	6	1.0102	1	0.05	0	-0.59798	1.02148
Days
Descriptive Statistics
	Mean	Std. Error	95.00% LCL	95.00% UCL
20.5	0.35155	0.07637	0.02298	0.68013
27.5	0.39523	0.21714	-0.53906	1.32951
3.6	0.57968	0.34283	-0.8954	2.05477
10.6	0.19895	0.08445	-0.16443	0.56233
Pairwise Comparison
Bonferroni Test
	Index	Mean Difference	Std. Error	DF	|t|value	Prob>|t|	Alpha	Sig Flag	95.00% LCL	95.00% UCL
20.5 27.5	0	-0.04367	0.20961	6	0.20835	1	0.05	0	-0.8534	0.76606
20.5 3.6	1	-0.22813	0.20961	6	1.08835	1	0.05	0	-1.03786	0.5816
20.5 10.6	2	0.1526	0.20961	6	0.72803	1	0.05	0	-0.65713	0.96233
27.5 3.6	3	-0.18446	0.20961	6	0.88001	1	0.05	0	-0.99419	0.62527
27.5 10.6	4	0.19627	0.20961	6	0.93637	1	0.05	0	-0.61345	1.006
3.6 10.6	5	0.38073	0.20961	6	1.81638	0.7153	0.05	0	-0.42899	1.19046
Zn * Days
Descriptive Statistics
		Mean	Std. Error	95.00% LCL	95.00% UCL
Zn Drought with bacteria	20.5	0.51377	0.58594	-2.00733	3.03486
Zn Drought with bacteria	27.5	-0.09292	0.42844	-1.93633	1.7505
Zn Drought with bacteria	3.6	0.28691	0.09676	-0.12941	0.70324
Zn Drought with bacteria	10.6	0.2022	0.19819	-0.65055	1.05495
Zn Drought withoout bacteria	20.5	0.16168	0.2511	-0.9187	1.24206
Zn Drought withoout bacteria	27.5	-0.34755	0.02904	-0.47248	-0.22262
Zn Drought withoout bacteria	3.6	0.69907	0.54058	-1.62687	3.025
Zn Drought withoout bacteria	10.6	0.12942	0.20938	-0.77147	1.03031
Zn Irrigated with bacteria	20.5	0.58659	0.01583	0.51846	0.65472
Zn Irrigated with bacteria	27.5	1.20351	0.50183	-0.95568	3.36271
Zn Irrigated with bacteria	3.6	0.58249	0.20592	-0.30351	1.46849
Zn Irrigated with bacteria	10.6	0.32544	0.06331	0.05305	0.59784
Zn Irrigated without bacteria	20.5	0.14417	0.03642	-0.01254	0.30089
Zn Irrigated without bacteria	27.5	0.81786	0.16214	0.12022	1.51549
Zn Irrigated without bacteria	3.6	0.75027	0.58027	-1.74644	3.24699
Zn Irrigated without bacteria	10.6	0.13874	0.08645	-0.23324	0.51072
Pairwise Comparison
Bonferroni Test
Days within Zn = Zn Drought with bacteria
	Index	Mean Difference	Std. Error	DF	|t|value	Prob>|t|	Alpha	Sig Flag	95.00% LCL	95.00% UCL
20.5 27.5	0	0.60668	0.41922	18	1.44716	1	0.05	0	-1.20242	2.41579
20.5 3.6	1	0.22686	0.41922	18	0.54113	1	0.05	0	-1.58224	2.03596
20.5 10.6	2	0.31157	0.41922	18	0.7432	1	0.05	0	-1.49753	2.12067
27.5 3.6	3	-0.37983	0.41922	18	0.90603	1	0.05	0	-2.18893	1.42927
27.5 10.6	4	-0.29512	0.41922	18	0.70396	1	0.05	0	-2.10422	1.51398
3.6 10.6	5	0.08471	0.41922	18	0.20207	1	0.05	0	-1.72439	1.89381
Days within Zn = Zn Drought withoout bacteria
	Index	Mean Difference	Std. Error	DF	|t|value	Prob>|t|	Alpha	Sig Flag	95.00% LCL	95.00% UCL
20.5 27.5	0	0.50923	0.41922	18	1.2147	1	0.05	0	-1.29987	2.31833
20.5 3.6	1	-0.53739	0.41922	18	1.28186	1	0.05	0	-2.34649	1.27172
20.5 10.6	2	0.03226	0.41922	18	0.07696	1	0.05	0	-1.77684	1.84136
27.5 3.6	3	-1.04662	0.41922	18	2.49656	1	0.05	0	-2.85572	0.76248
27.5 10.6	4	-0.47697	0.41922	18	1.13775	1	0.05	0	-2.28607	1.33213
3.6 10.6	5	0.56965	0.41922	18	1.35881	1	0.05	0	-1.23945	2.37875
Days within Zn = Zn Irrigated with bacteria
	Index	Mean Difference	Std. Error	DF	|t|value	Prob>|t|	Alpha	Sig Flag	95.00% LCL	95.00% UCL
20.5 27.5	0	-0.61692	0.41922	18	1.47158	1	0.05	0	-2.42602	1.19218
20.5 3.6	1	0.0041	0.41922	18	0.00978	1	0.05	0	-1.805	1.8132
20.5 10.6	2	0.26115	0.41922	18	0.62293	1	0.05	0	-1.54795	2.07025
27.5 3.6	3	0.62102	0.41922	18	1.48136	1	0.05	0	-1.18808	2.43012
27.5 10.6	4	0.87807	0.41922	18	2.09451	1	0.05	0	-0.93103	2.68717
3.6 10.6	5	0.25704	0.41922	18	0.61314	1	0.05	0	-1.55206	2.06615
Days within Zn = Zn Irrigated without bacteria
	Index	Mean Difference	Std. Error	DF	|t|value	Prob>|t|	Alpha	Sig Flag	95.00% LCL	95.00% UCL
20.5 27.5	0	-0.67368	0.41922	18	1.60698	1	0.05	0	-2.48279	1.13542
20.5 3.6	1	-0.6061	0.41922	18	1.44577	1	0.05	0	-2.4152	1.203
20.5 10.6	2	0.00543	0.41922	18	0.01296	1	0.05	0	-1.80367	1.81454
27.5 3.6	3	0.06758	0.41922	18	0.16121	1	0.05	0	-1.74152	1.87668
27.5 10.6	4	0.67912	0.41922	18	1.61994	1	0.05	0	-1.12998	2.48822
3.6 10.6	5	0.61154	0.41922	18	1.45873	1	0.05	0	-1.19757	2.42064
Zn within Days = 20.5
	Index	Mean Difference	Std. Error	DF	|t|value	Prob>|t|	Alpha	Sig Flag	95.00% LCL	95.00% UCL
Zn Drought with bacteria Zn Drought withoout bacteria	0	0.35209	0.41922	18	0.83985	1	0.05	0	-1.45702	2.16119
Zn Drought with bacteria Zn Irrigated with bacteria	1	-0.07282	0.41922	18	0.17371	1	0.05	0	-1.88193	1.73628
Zn Drought with bacteria Zn Irrigated without bacteria	2	0.36959	0.41922	18	0.88162	1	0.05	0	-1.43951	2.1787
Zn Drought withoout bacteria Zn Irrigated with bacteria	3	-0.42491	0.41922	18	1.01356	1	0.05	0	-2.23401	1.38419
Zn Drought withoout bacteria Zn Irrigated without bacteria	4	0.01751	0.41922	18	0.04176	1	0.05	0	-1.79159	1.82661
Zn Irrigated with bacteria Zn Irrigated without bacteria	5	0.44242	0.41922	18	1.05533	1	0.05	0	-1.36668	2.25152
Zn within Days = 27.5
	Index	Mean Difference	Std. Error	DF	|t|value	Prob>|t|	Alpha	Sig Flag	95.00% LCL	95.00% UCL
Zn Drought with bacteria Zn Drought withoout bacteria	0	0.25463	0.41922	18	0.60739	0.0323	0.05	0	-1.55447	2.06373
Zn Drought with bacteria Zn Irrigated with bacteria	1	-1.29643	0.41922	18	3.09245	0.75386	0.05	0	-3.10553	0.51267
Zn Drought with bacteria Zn Irrigated without bacteria	2	-0.91077	0.41922	18	2.17252	1	0.05	0	-2.71988	0.89833
Zn Drought withoout bacteria Zn Irrigated with bacteria	3	-1.55106	0.41922	18	3.69984	0.19671	0.05	0	-3.36016	0.25804
Zn Drought withoout bacteria Zn Irrigated without bacteria	4	-1.16541	0.41922	18	2.77992	1	0.05	0	-2.97451	0.64369
Zn Irrigated with bacteria Zn Irrigated without bacteria	5	0.38565	0.41922	18	0.91993	1	0.05	0	-1.42345	2.19476
Zn within Days = 3.6
	Index	Mean Difference	Std. Error	DF	|t|value	Prob>|t|	Alpha	Sig Flag	95.00% LCL	95.00% UCL
Zn Drought with bacteria Zn Drought withoout bacteria	0	-0.41216	0.41922	18	0.98314	1	0.05	0	-2.22126	1.39695
Zn Drought with bacteria Zn Irrigated with bacteria	1	-0.29558	0.41922	18	0.70506	1	0.05	0	-2.10468	1.51352
Zn Drought with bacteria Zn Irrigated without bacteria	2	-0.46336	0.41922	18	1.10529	1	0.05	0	-2.27246	1.34574
Zn Drought withoout bacteria Zn Irrigated with bacteria	3	0.11658	0.41922	18	0.27808	1	0.05	0	-1.69252	1.92568
Zn Drought withoout bacteria Zn Irrigated without bacteria	4	-0.05121	0.41922	18	0.12215	1	0.05	0	-1.86031	1.75789
Zn Irrigated with bacteria Zn Irrigated without bacteria	5	-0.16778	0.41922	18	0.40023	1	0.05	0	-1.97688	1.64132
Zn within Days = 10.6
	Index	Mean Difference	Std. Error	DF	|t|value	Prob>|t|	Alpha	Sig Flag	95.00% LCL	95.00% UCL
Zn Drought with bacteria Zn Drought withoout bacteria	0	0.07278	0.41922	18	0.1736	1	0.05	0	-1.73632	1.88188
Zn Drought with bacteria Zn Irrigated with bacteria	1	-0.12325	0.41922	18	0.29399	1	0.05	0	-1.93235	1.68586
Zn Drought with bacteria Zn Irrigated without bacteria	2	0.06346	0.41922	18	0.15138	1	0.05	0	-1.74564	1.87256
Zn Drought withoout bacteria Zn Irrigated with bacteria	3	-0.19602	0.41922	18	0.46759	1	0.05	0	-2.00513	1.61308
Zn Drought withoout bacteria Zn Irrigated without bacteria	4	-0.00932	0.41922	18	0.02223	1	0.05	0	-1.81842	1.79978
Zn Irrigated with bacteria Zn Irrigated without bacteria	5	0.18671	0.41922	18	0.44536	1	0.05	0	-1.62239	1.99581

## Sheet: (D)
(D) Mn
ANOVATwoWay_Repeated-Measures
Mauchly's Test of Sphericity
	Mauchly's W	Approx. Chi-Square	DF	Prob>ChiSq	Greenhouse-Geisser Epsilon	Huynh-Feldt Epsilon	Lower-bound Epsilon
Mn	0.15049	7.0493	5	0.217	0.47539	0.61158	0.33333
Days	0.50303	2.55753	5	0.76781	0.75004	1	0.33333
Mn * Days	0	0	0	0	0.24656	0.45206	0.11111
Tests of Within-Subjects Effects
		Sum of Squares	DF	Mean Square	F	Prob>F
Mn	Sphericity Assumed	5.52367	3	1.84122	4.01608	0.02779
Mn	Greenhouse-Geisser	5.52367	1.42617	3.87307	4.01608	0.07637
Mn	Huynh-Feldt	5.52367	1.83474	3.0106	4.01608	0.05839
Mn	Lower-bound	5.52367	1	5.52367	4.01608	0.10142
Error(Mn)	Sphericity Assumed	6.87695	15	0.45846
Error(Mn)	Greenhouse-Geisser	6.87695	7.13087	0.96439
Error(Mn)	Huynh-Feldt	6.87695	9.17371	0.74964
Error(Mn)	Lower-bound	6.87695	5	1.37539
Days	Sphericity Assumed	2.15999	3	0.72	6.97036	0.00369
Days	Greenhouse-Geisser	2.15999	2.25013	0.95994	6.97036	0.0093
Days	Huynh-Feldt	2.15999	3	0.72	6.97036	0.00369
Days	Lower-bound	2.15999	1	2.15999	6.97036	0.04597
Error(Days)	Sphericity Assumed	1.54941	15	0.10329
Error(Days)	Greenhouse-Geisser	1.54941	11.2507	0.13772
Error(Days)	Huynh-Feldt	1.54941	15	0.10329
Error(Days)	Lower-bound	1.54941	5	0.30988
Mn * Days	Sphericity Assumed	0.95375	9	0.10597	0.51244	0.85776
Mn * Days	Greenhouse-Geisser	0.95375	2.21907	0.4298	0.51244	0.63067
Mn * Days	Huynh-Feldt	0.95375	4.06856	0.23442	0.51244	0.73014
Mn * Days	Lower-bound	0.95375	1	0.95375	0.51244	0.50611
Error(Mn * Days)	Sphericity Assumed	9.30593	45	0.2068
Error(Mn * Days)	Greenhouse-Geisser	9.30593	11.0953	0.83872
Error(Mn * Days)	Huynh-Feldt	9.30593	20.3428	0.45746
Error(Mn * Days)	Lower-bound	9.30593	5	1.86119
Tests of Between-Subjects Effects
	Sum of Squares	DF	Mean Square	F	Prob>F
Intercept	2.94837	1	2.94837	4.76773	0.08075
Error	3.09201	5	0.6184
Mn
Descriptive Statistics
	Mean	Std. Error	95.00% LCL	95.00% UCL
Mn Drought with bacteria	-0.50572	0.16283	-0.92428	-0.08716
Mn Drought withoout bacteria	0.07674	0.15889	-0.33169	0.48517
Mn Irrigated with bacteria	-0.30088	0.13228	-0.6409	0.03914
Mn Irrigated without bacteria	0.02886	0.11756	-0.27334	0.33107
Pairwise Comparison
Bonferroni Test
	Index	Mean Difference	Std. Error	DF	|t|value	Prob>|t|	Alpha	Sig Flag	95.00% LCL	95.00% UCL
Mn Drought with bacteria Mn Drought withoout bacteria	0	-0.58246	0.14037	15	4.14956	0.00514	0.05	1	-1.00865	-0.15627
Mn Drought with bacteria Mn Irrigated with bacteria	1	-0.20484	0.14037	15	1.45931	0.99062	0.05	0	-0.63103	0.22135
Mn Drought with bacteria Mn Irrigated without bacteria	2	-0.53458	0.14037	15	3.8085	0.01028	0.05	1	-0.96077	-0.10839
Mn Drought withoout bacteria Mn Irrigated with bacteria	3	0.37762	0.14037	15	2.69025	0.1007	0.05	0	-0.04857	0.80381
Mn Drought withoout bacteria Mn Irrigated without bacteria	4	0.04787	0.14037	15	0.34107	1	0.05	0	-0.37832	0.47406
Mn Irrigated with bacteria Mn Irrigated without bacteria	5	-0.32975	0.14037	15	2.34919	0.19758	0.05	0	-0.75594	0.09644
Days
Descriptive Statistics
	Mean	Std. Error	95.00% LCL	95.00% UCL
20.5	-0.01128	0.09681	-0.26014	0.23757
27.5	-0.41239	0.1373	-0.76533	-0.05946
3.6	-0.18448	0.09054	-0.41723	0.04827
10.6	-0.09284	0.04752	-0.21499	0.02931
Pairwise Comparison
Bonferroni Test
	Index	Mean Difference	Std. Error	DF	|t|value	Prob>|t|	Alpha	Sig Flag	95.00% LCL	95.00% UCL
20.5 27.5	0	0.40111	0.14037	15	2.85761	0.07188	0.05	0	-0.02508	0.8273
20.5 3.6	1	0.1732	0.14037	15	1.23389	1	0.05	0	-0.25299	0.59939
20.5 10.6	2	0.08155	0.14037	15	0.58101	1	0.05	0	-0.34464	0.50774
27.5 3.6	3	-0.22792	0.14037	15	1.62373	0.75155	0.05	0	-0.65411	0.19827
27.5 10.6	4	-0.31956	0.14037	15	2.27661	0.22738	0.05	0	-0.74575	0.10663
3.6 10.6	5	-0.09164	0.14037	15	0.65288	1	0.05	0	-0.51783	0.33455
Mn * Days
Descriptive Statistics
		Mean	Std. Error	95.00% LCL	95.00% UCL
Mn Drought with bacteria	20.5	-0.39446	0.13047	-0.72984	-0.05907
Mn Drought with bacteria	27.5	-0.90497	0.38049	-1.88306	0.07313
Mn Drought with bacteria	3.6	-0.44467	0.14826	-0.82578	-0.06356
Mn Drought with bacteria	10.6	-0.27878	0.10737	-0.55478	-0.00278
Mn Drought withoout bacteria	20.5	0.26506	0.14743	-0.11392	0.64403
Mn Drought withoout bacteria	27.5	-0.28859	0.29083	-1.03619	0.45901
Mn Drought withoout bacteria	3.6	0.1403	0.13861	-0.21601	0.4966
Mn Drought withoout bacteria	10.6	0.1902	0.15473	-0.20756	0.58795
Mn Irrigated with bacteria	20.5	-0.08321	0.17849	-0.54204	0.37561
Mn Irrigated with bacteria	27.5	-0.45261	0.24563	-1.08402	0.1788
Mn Irrigated with bacteria	3.6	-0.39357	0.29671	-1.15629	0.36916
Mn Irrigated with bacteria	10.6	-0.27413	0.13555	-0.62257	0.07431
Mn Irrigated without bacteria	20.5	0.16748	0.14526	-0.20592	0.54087
Mn Irrigated without bacteria	27.5	-0.00341	0.33092	-0.85406	0.84724
Mn Irrigated without bacteria	3.6	-0.03997	0.11822	-0.34386	0.26391
Mn Irrigated without bacteria	10.6	-0.00864	0.07859	-0.21067	0.19339
Pairwise Comparison
Bonferroni Test
Days within Mn = Mn Drought with bacteria
	Index	Mean Difference	Std. Error	DF	|t|value	Prob>|t|	Alpha	Sig Flag	95.00% LCL	95.00% UCL
20.5 27.5	0	0.51051	0.28073	45	1.8185	1	0.05	0	-0.55959	1.58061
20.5 3.6	1	0.05022	0.28073	45	0.17888	1	0.05	0	-1.01988	1.12031
20.5 10.6	2	-0.11568	0.28073	45	0.41206	1	0.05	0	-1.18578	0.95442
27.5 3.6	3	-0.46029	0.28073	45	1.63962	1	0.05	0	-1.53039	0.6098
27.5 10.6	4	-0.62619	0.28073	45	2.23056	1	0.05	0	-1.69629	0.44391
3.6 10.6	5	-0.16589	0.28073	45	0.59093	1	0.05	0	-1.23599	0.9042
Days within Mn = Mn Drought withoout bacteria
	Index	Mean Difference	Std. Error	DF	|t|value	Prob>|t|	Alpha	Sig Flag	95.00% LCL	95.00% UCL
20.5 27.5	0	0.55365	0.28073	45	1.97216	1	0.05	0	-0.51645	1.62375
20.5 3.6	1	0.12476	0.28073	45	0.44441	1	0.05	0	-0.94534	1.19486
20.5 10.6	2	0.07486	0.28073	45	0.26666	1	0.05	0	-0.99524	1.14496
27.5 3.6	3	-0.42889	0.28073	45	1.52775	1	0.05	0	-1.49899	0.64121
27.5 10.6	4	-0.47879	0.28073	45	1.7055	1	0.05	0	-1.54889	0.59131
3.6 10.6	5	-0.0499	0.28073	45	0.17775	1	0.05	0	-1.12	1.0202
Days within Mn = Mn Irrigated with bacteria
	Index	Mean Difference	Std. Error	DF	|t|value	Prob>|t|	Alpha	Sig Flag	95.00% LCL	95.00% UCL
20.5 27.5	0	0.3694	0.28073	45	1.31585	1	0.05	0	-0.7007	1.4395
20.5 3.6	1	0.31036	0.28073	45	1.10552	1	0.05	0	-0.75974	1.38045
20.5 10.6	2	0.19092	0.28073	45	0.68007	1	0.05	0	-0.87918	1.26102
27.5 3.6	3	-0.05905	0.28073	45	0.21033	1	0.05	0	-1.12914	1.01105
27.5 10.6	4	-0.17848	0.28073	45	0.63578	1	0.05	0	-1.24858	0.89162
3.6 10.6	5	-0.11944	0.28073	45	0.42545	1	0.05	0	-1.18954	0.95066
Days within Mn = Mn Irrigated without bacteria
	Index	Mean Difference	Std. Error	DF	|t|value	Prob>|t|	Alpha	Sig Flag	95.00% LCL	95.00% UCL
20.5 27.5	0	0.17089	0.28073	45	0.60872	1	0.05	0	-0.89921	1.24098
20.5 3.6	1	0.20745	0.28073	45	0.73897	1	0.05	0	-0.86265	1.27755
20.5 10.6	2	0.17611	0.28073	45	0.62734	1	0.05	0	-0.89399	1.24621
27.5 3.6	3	0.03656	0.28073	45	0.13025	1	0.05	0	-1.03353	1.10666
27.5 10.6	4	0.00523	0.28073	45	0.01862	1	0.05	0	-1.06487	1.07533
3.6 10.6	5	-0.03134	0.28073	45	0.11163	1	0.05	0	-1.10144	1.03876
Mn within Days = 20.5
	Index	Mean Difference	Std. Error	DF	|t|value	Prob>|t|	Alpha	Sig Flag	95.00% LCL	95.00% UCL
Mn Drought with bacteria Mn Drought withoout bacteria	0	-0.65951	0.28073	45	2.34926	1	0.05	0	-1.72961	0.41059
Mn Drought with bacteria Mn Irrigated with bacteria	1	-0.31124	0.28073	45	1.10869	1	0.05	0	-1.38134	0.75886
Mn Drought with bacteria Mn Irrigated without bacteria	2	-0.56193	0.28073	45	2.00167	1	0.05	0	-1.63203	0.50817
Mn Drought withoout bacteria Mn Irrigated with bacteria	3	0.34827	0.28073	45	1.24057	1	0.05	0	-0.72183	1.41837
Mn Drought withoout bacteria Mn Irrigated without bacteria	4	0.09758	0.28073	45	0.34758	1	0.05	0	-0.97252	1.16768
Mn Irrigated with bacteria Mn Irrigated without bacteria	5	-0.25069	0.28073	45	0.89299	1	0.05	0	-1.32079	0.81941
Mn within Days = 27.5
	Index	Mean Difference	Std. Error	DF	|t|value	Prob>|t|	Alpha	Sig Flag	95.00% LCL	95.00% UCL
Mn Drought with bacteria Mn Drought withoout bacteria	0	-0.61637	0.28073	45	2.1956	1	0.05	0	-1.68647	0.45372
Mn Drought with bacteria Mn Irrigated with bacteria	1	-0.45235	0.28073	45	1.61134	1	0.05	0	-1.52245	0.61775
Mn Drought with bacteria Mn Irrigated without bacteria	2	-0.90156	0.28073	45	3.21146	0.29279	0.05	0	-1.97166	0.16854
Mn Drought withoout bacteria Mn Irrigated with bacteria	3	0.16402	0.28073	45	0.58426	1	0.05	0	-0.90608	1.23412
Mn Drought withoout bacteria Mn Irrigated without bacteria	4	-0.28518	0.28073	45	1.01585	1	0.05	0	-1.35528	0.78492
Mn Irrigated with bacteria Mn Irrigated without bacteria	5	-0.4492	0.28073	45	1.60012	1	0.05	0	-1.5193	0.62089
Mn within Days = 3.6
	Index	Mean Difference	Std. Error	DF	|t|value	Prob>|t|	Alpha	Sig Flag	95.00% LCL	95.00% UCL
Mn Drought with bacteria Mn Drought withoout bacteria	0	-0.58497	0.28073	45	2.08372	1	0.05	0	-1.65507	0.48513
Mn Drought with bacteria Mn Irrigated with bacteria	1	-0.0511	0.28073	45	0.18204	1	0.05	0	-1.1212	1.01899
Mn Drought with bacteria Mn Irrigated without bacteria	2	-0.4047	0.28073	45	1.44158	1	0.05	0	-1.4748	0.6654
Mn Drought withoout bacteria Mn Irrigated with bacteria	3	0.53386	0.28073	45	1.90169	1	0.05	0	-0.53624	1.60396
Mn Drought withoout bacteria Mn Irrigated without bacteria	4	0.18027	0.28073	45	0.64214	1	0.05	0	-0.88983	1.25037
Mn Irrigated with bacteria Mn Irrigated without bacteria	5	-0.35359	0.28073	45	1.25954	1	0.05	0	-1.42369	0.7165
Mn within Days = 10.6
	Index	Mean Difference	Std. Error	DF	|t|value	Prob>|t|	Alpha	Sig Flag	95.00% LCL	95.00% UCL
Mn Drought with bacteria Mn Drought withoout bacteria	0	-0.46897	0.28073	45	1.67054	1	0.05	0	-1.53907	0.60113
Mn Drought with bacteria Mn Irrigated with bacteria	1	-0.00465	0.28073	45	0.01655	1	0.05	0	-1.07475	1.06545
Mn Drought with bacteria Mn Irrigated without bacteria	2	-0.27014	0.28073	45	0.96228	1	0.05	0	-1.34024	0.79996
Mn Drought withoout bacteria Mn Irrigated with bacteria	3	0.46433	0.28073	45	1.65398	1	0.05	0	-0.60577	1.53442
Mn Drought withoout bacteria Mn Irrigated without bacteria	4	0.19883	0.28073	45	0.70826	1	0.05	0	-0.87127	1.26893
Mn Irrigated with bacteria Mn Irrigated without bacteria	5	-0.26549	0.28073	45	0.94572	1	0.05	0	-1.33559	0.8046

## Sheet: (E)
(E) Soil phosporous
ANOVATwoWay Drought peirod (21.05)
Descriptive Statistics
Treatment
	N	Mean	SD	SEM	Variance	Missing	NonMissing
Drought	12	0.80677	0.10721	0.03095	0.01149	0	12
Irrigated	12	0.81851	0.1157	0.0334	0.01339	0	12
Bacteria
	N	Mean	SD	SEM	Variance	Missing	NonMissing
with Bacteria	12	0.83301	0.11475	0.03313	0.01317	0	12
without Bacteria	12	0.79227	0.10433	0.03012	0.01088	0	12
Overall
	N	Mean	SD	SEM	Variance	Missing	NonMissing
	24	0.81264	0.10925	0.0223	0.01194	0	24
Interaction
		N	Mean	SD	SEM	Variance	Missing	NonMissing
Drought	with Bacteria	6	0.84211	0.11543	0.04712	0.01332	0	6
Drought	without Bacteria	6	0.77143	0.09469	0.03866	0.00897	0	6
Irrigated	with Bacteria	6	0.82391	0.12429	0.05074	0.01545	0	6
Irrigated	without Bacteria	6	0.8131	0.11805	0.04819	0.01394	0	6
ANOVA
Overall ANOVA
	DF	Sum of Squares	Mean Square	F Value	P Value
Treatment	1	0.000826459	0.000826459	0.06398	0.8029
Bacteria	1	0.00996	0.00996	0.77103	0.39033
Interaction	1	0.00538	0.00538	0.4163	0.52612
Model	3	0.01616	0.00539	0.4171	0.74264
Error	20	0.25836	0.01292	--	--
Corrected Total	23	0.27453	--	--	--
Means Comparisons
Tukey Test
Treatment
	MeanDiff	SEM	q Value	Prob	Alpha	Sig	LCL	UCL
Irrigated Drought	0.01174	0.0464	0.35771	0.8029	0.05	0	-0.08505	0.10853
Bacteria
	MeanDiff	SEM	q Value	Prob	Alpha	Sig	LCL	UCL
without Bacteria with Bacteria	-0.04074	0.0464	1.24179	0.39033	0.05	0	-0.13753	0.05605
Interactions
Treatment	Bacteria	Treatment	Bacteria	MeanDiff	SEM	q Value	Prob	Alpha	Sig	LCL	UCL
Drought	without Bacteria	Drought	with Bacteria	0.07068	0.06562	1.5233	0.047	0.05	1	0.25435	0.11298
Irrigated	with Bacteria	Drought	with Bacteria	-0.0182	0.06562	0.39228	0.99231	0.05	0	-0.20187	0.16546
Irrigated	with Bacteria	Drought	without Bacteria	0.05248	0.06562	1.13102	0.8537	0.05	0	-0.13119	0.23615
Irrigated	without Bacteria	Drought	with Bacteria	-0.02901	0.06562	0.62515	0.9704	0.05	0	-0.21267	0.15466
Irrigated	without Bacteria	Drought	without Bacteria	0.04167	0.06562	0.89815	0.91945	0.05	0	-0.14199	0.22534
Irrigated	without Bacteria	Irrigated	with Bacteria	-0.01081	0.06562	0.23287	0.99836	0.05	0	-0.19447	0.17286
ANOVATwoWay Re-Irrigated peirod (16.06)
Descriptive Statistics
Treatment
	N	Mean	SD	SEM	Variance	Missing	NonMissing
Drought	12	0.96533	0.08635	0.02493	0.00746	0	12
Irrigated	12	0.98231	0.11451	0.03306	0.01311	0	12
Bacteria
	N	Mean	SD	SEM	Variance	Missing	NonMissing
with Bacteria	12	0.96165	0.10102	0.02916	0.0102	0	12
without Bacteria	12	0.98599	0.10098	0.02915	0.0102	0	12
Overall
	N	Mean	SD	SEM	Variance	Missing	NonMissing
	24	0.97382	0.09956	0.02032	0.00991	0	24
Interaction
		N	Mean	SD	SEM	Variance	Missing	NonMissing
Drought	with Bacteria	6	0.96741	0.08545	0.03488	0.0073	0	6
Drought	without Bacteria	6	0.96326	0.09536	0.03893	0.00909	0	6
Irrigated	with Bacteria	6	0.95589	0.12276	0.05012	0.01507	0	6
Irrigated	without Bacteria	6	1.00873	0.11	0.04491	0.0121	0	6
ANOVA
Overall ANOVA
	DF	Sum of Squares	Mean Square	F Value	P Value
Treatment	1	0.00173	0.00173	0.15875	0.69454
Bacteria	1	0.00355	0.00355	0.3264	0.57415
Interaction	1	0.00487	0.00487	0.44725	0.51129
Model	3	0.01016	0.00339	0.3108	0.81732
Error	20	0.21783	0.01089	--	--
Corrected Total	23	0.22798	--	--	--
Means Comparisons
Tukey Test
Treatment
	MeanDiff	SEM	q Value	Prob	Alpha	Sig	LCL	UCL
Irrigated Drought	0.01698	0.04261	0.56346	0.69454	0.05	0	-0.0719	0.10585
Bacteria
	MeanDiff	SEM	q Value	Prob	Alpha	Sig	LCL	UCL
without Bacteria with Bacteria	0.02434	0.04261	0.80796	0.57415	0.05	0	-0.06453	0.11322
Interactions
Treatment	Bacteria	Treatment	Bacteria	MeanDiff	SEM	q Value	Prob	Alpha	Sig	LCL	UCL
Drought	without Bacteria	Drought	with Bacteria	-0.00415	0.06025	0.09745	0.99988	0.05	0	-0.1728	0.16449
Irrigated	with Bacteria	Drought	with Bacteria	-0.01152	0.06025	0.27034	0.99744	0.05	0	-0.18016	0.15713
Irrigated	with Bacteria	Drought	without Bacteria	-0.00737	0.06025	0.17289	0.99932	0.05	0	-0.17601	0.16128
Irrigated	without Bacteria	Drought	with Bacteria	0.04132	0.06025	0.96975	0.90132	0.05	0	-0.12733	0.20996
Irrigated	without Bacteria	Drought	without Bacteria	0.04547	0.06025	1.0672	0.87362	0.05	0	-0.12317	0.21411
Irrigated	without Bacteria	Irrigated	with Bacteria	0.05283	0.06025	1.24009	0.81669	0.05	0	-0.11581	0.22148
